# Supplementary material for: Social and geographic inequalities in premature adult mortality in Japan: a multilevel observational study from 1970 to 2005
Source: PubMed Central journal article supplement — BMJ Open. 2012 Mar 2;2(2):e000425. doi: 10.1136/bmjopen-2011-000425 (PMC3293144; doi:10.1136/bmjopen-2011-000425), 2012-03-02
Supplement: bmjopen-2011-000425-s3.pdf [file bmjopen-2011-000425-s3.pdf]

## Supplementary Text

### **Overview of supplementary analyses**

As supplementary analyses, we examined two additional issues to further explore the social and geographic inequalities in premature mortality; (i) the patterns of geographic inequalities in mortality by occupations, and (ii) the presence of contextual effects of prefecture-level socioeconomic status on mortality risk.

### **Geographic inequalities in all-cause premature mortality by occupations**

#### ***Background and aims***

Although we examined the patterns of geographic inequalities in premature mortality for all occupations in the main analysis, the patterns may vary (substantially) according to occupations. Therefore, we examined the occupation-specific geographic inequality in premature mortality for the overall study period. This analysis may further facilitate understanding of the possible pathways of emerging geographic inequalities in Japan.

#### ***Methods***

Following the previous report of the Population Census,<sup>1</sup> we summarized the 11 occupations into six groups to increase the statistical power as follows: I. clerical, technical and managerial occupations (ie, (1) specialist and technical workers, (2) administrative and managerial workers, and (3) clerical workers), II. sales and service occupations (ie, (4) sales workers, (5) service workers, and (6) security workers), III. agriculture, forestry and fishery occupations (ie, (7) agriculture, forestry and fishery workers), IV. production and transport occupations (ie, (8) transport and communication workers and (9) production process and related workers), V. unclassifiable occupations (ie, (10) workers not classifiable by occupation), and VI. non-employed (ie, (11) non-employed) (Supplementary Table 1).

In this supplementary analysis, we specified six prefecture-level error terms (at level 3) corresponding to the six occupational groups, conditional on individual age, 11 occupations, and years as fixed terms. We calculated the variance and covariance of these error terms, and we also derived their correlation coefficients to explore the possible differential geographic patterns of mortality by the six occupational groups. Finally, we created maps showing prefecture-level residuals in the same methods as the main analysis.

#### ***Results***

We show the results of variance and covariance of prefecture-level residuals among the six occupational groups (Supplementary Table 8). Men and women revealed a similar pattern except for the covariance between sales and service occupations and non-employed (-0.003 and 0.005 in men and women, respectively) and the covariance between agriculture, forestry and fishery occupations and unclassifiable occupations (0.006 and -0.019 in men and women, respectively). In both sexes, the

variances among unclassifiable occupations were much higher than those of other occupational groups (0.317 and 0.331 in men and women, respectively). Further, excluding unclassifiable occupations and non-employed, the signs of correlation coefficients were all positive, indicating that the patterns of geographic inequalities were similar across the remaining four occupational groups. We show these geographic patterns in both sexes (Supplementary Figures 4 and 5).

## **Contextual effect of prefecture-level socioeconomic status**

### ***Background and aims***

Previous studies in Japan have examined possible contextual effects of area-level socioeconomic status (eg, income inequality, per-capita income) on self-rated health and health-related behaviours by using multilevel analysis.<sup>2-4</sup> The relationship between area-level socioeconomic status and mortality has been also investigated in ecological studies,<sup>5-12</sup> most of which indicated higher mortality in areas of lower socioeconomic position. Indeed, recent international comparative studies have confirmed an association between income inequality and health, which included Japan.<sup>13-15</sup> However, no studies have examined the association between area-level socioeconomic status and premature adult mortality in Japan, by considering both individual- and area-level socioeconomic indicators. Further, we note the possibility that contextual effects by area-level disadvantage may have changed after the collapse of asset bubble in the early 1990s. Therefore, we examined the trends of contextual effects of prefecture-level socioeconomic status on premature adult mortality.

### ***Methods***

We derived prefecture-level socioeconomic status variables from the *National Survey of Family Income and Expenditure*,<sup>16</sup> which has been implemented every 5 years since the first survey in 1959. We derived the following three variables for each prefecture and divided them into tertiles; Gini's coefficient of yearly income, average yearly income, and average savings (Supplementary Table 9). These variables were calculated among two-or-more-person households. Gini's coefficient of yearly income was available since 1979, and we imputed the values of 1979 forwardly to 1969 and 1974. Although household income and savings may follow the skewed distributions, median income or savings were not available throughout the study period. Note that a previous review article suggested that the studies in income inequality are more supportive in large areas, eg, states, regions, and metropolitan areas, because in that context income inequality serves as a measure of the scale of social stratification.<sup>17</sup> As Shibuya *et al*<sup>2</sup> noted, a prefecture is similar to a state in the United States in terms of its population size and variations in income inequality.

We linked the data set of prefecture-level variables to the data set of the Population Census and the Vital Statistics one year out, eg, National Survey of Family Income and Expenditure in 2004 was linked with the Population Census in 2005 and the Vital Statistics in 2005 fiscal year.

In the analysis, we conducted three-level analyses as an overall model, with cells at level 1, years at level 2, and prefectures at level 3. The prefecture-level socioeconomic status variable was entered

into the model as a level-2 variable separately. Furthermore, to examine the joint effects of income inequality and average income/savings, we also entered Gini's coefficient and average yearly income/savings into the model simultaneously. In like manner, to examine the temporal patterns of contextual effects, we also conducted two-level analysis, with cells at level 1 and prefectures at level 2 separately for each year.

### **Results**

Overall, we found little evidence of the association between prefecture-level socioeconomic status and the risk of mortality in both sexes, conditional on individual age and occupation (Supplementary Table 10). Likewise, in year-specific analyses, no clear associations were found although lower average savings were associated with higher risk of mortality in some years. When we examined the joint effects of income inequality and average income/savings, no substantial differences were observed (data not shown).

### **Conclusions of supplementary analyses**

Excluding unclassifiable occupations and non-employed, the patterns of geographic inequalities were similar across occupational groups. We found no clear associations between prefecture-level socioeconomic status and premature mortality risk throughout the period although there is a suggestion of an inverse association between average savings and mortality in some years.

### **References**

1. Ministry of Internal Affairs and Communications. *Population Census: Explanation of Terms*.  
<http://www.stat.go.jp/english/data/kokusei/2000/terms.htm#Occupation>
2. Shibuya K, Hashimoto H, Yano E. Individual income, income distribution, and self rated health in Japan: cross sectional analysis of nationally representative sample. *BMJ* 2002;324:16-9.
3. Fukuda Y, Nakamura K, Takano T. Accumulation of health risk behaviours is associated with lower socioeconomic status and women's urban residence: a multilevel analysis in Japan. *BMC Public Health* 2005;5:53.
4. Ichida Y, Kondo K, Hirai H, *et al*. Social capital, income inequality and self-rated health in Chita peninsula, Japan: a multilevel analysis of older people in 25 communities. *Soc Sci Med* 2009;69:489-99.
5. Fukuda Y, Nakao H, Yahata Y, *et al*. Are health inequalities increasing in Japan? The trends of 1955 to 2000. *Biosci Trends* 2007;1:38-42.
6. Fukuda Y, Nakamura K, Takano T. Higher mortality in areas of lower socioeconomic position measured by a single index of deprivation in Japan. *Public Health* 2007;121:163-73.
7. Nakaya T, Dorling D. Geographical inequalities of mortality by income in two developed island countries: a cross-national comparison of Britain and Japan. *Soc Sci Med* 2005;60:2865-75.

8. Fukuda Y, Nakamura K, Takano T. Cause-specific mortality differences across socioeconomic position of municipalities in Japan, 1973-1977 and 1993-1998: increased importance of injury and suicide in inequality for ages under 75. *Int J Epidemiol* 2005;34:100-9.
9. Fukuda Y, Umezaki M, Nakamura K, *et al.* Variations in societal characteristics of spatial disease clusters: examples of colon, lung and breast cancer in Japan. *Int J Health Geogr* 2005;4:16.
10. Fukuda Y, Nakamura K, Takano T. Municipal health expectancy in Japan: decreased healthy longevity of older people in socioeconomically disadvantaged areas. *BMC Public Health* 2005;5:65.
11. Fukuda Y, Nakamura K, Takano T. Municipal socioeconomic status and mortality in Japan: sex and age differences, and trends in 1973-1998. *Soc Sci Med* 2004;59:2435-45.
12. Fukuda Y, Nakamura K, Takano T. Wide range of socioeconomic factors associated with mortality among cities in Japan. *Health Promot Int* 2004;19:177-87.
13. Kim D, Kawachi I, Hoorn SV, *et al.* Is inequality at the heart of it? Cross-country associations of income inequality with cardiovascular diseases and risk factors. *Soc Sci Med* 2008;66:1719-32.
14. Elgar FJ. Income inequality, trust, and population health in 33 countries. *Am J Public Health* 2010;100:2311-5.
15. Karlsson M, Nilsson T, Lyttkens CH, *et al.* Income inequality and health: importance of a cross-country perspective. *Soc Sci Med* 2010;70:875-85.
16. Ministry of Internal Affairs and Communications. *National Survey of Family Income and Expenditure*. <http://www.stat.go.jp/english/data/zensho/index.htm>
17. Wilkinson RG, Pickett KE. Income inequality and population health: a review and explanation of the evidence. *Soc Sci Med* 2006;62:1768-84.

**Supplementary Table 1.** The history of the Japan Standard Occupational Classification <sup>a</sup>

| 1st revision, 1970 |                                                     | 2nd revision, 1979 |                                                     | 3rd revision, 1986 |                                                                             | 4th revision, 1997 |                                           |
|--------------------|-----------------------------------------------------|--------------------|-----------------------------------------------------|--------------------|-----------------------------------------------------------------------------|--------------------|-------------------------------------------|
| No.                | Occupation (major group)                            | No.                | Occupation (major group)                            | No.                | Occupation (major group)                                                    | No.                | Occupation (major group) <sup>b</sup>     |
| (1) [1]            | Professional and technical workers                  | (1) [1]            | Professional and technical workers                  | (1) [1]            | Professional and technical workers                                          | (1) [1]            | Specialist and technical workers          |
| (2) [2]            | Managers and officials                              | (2) [2]            | Managers and officials                              | (2) [2]            | Managers and officials                                                      | (2) [2]            | Administrative and managerial workers     |
| (3) [3]            | Clerical and related workers                        | (3) [3]            | Clerical and related workers                        | (3) [3]            | Clerical and related workers                                                | (3) [3]            | Clerical workers                          |
| (4) [4]            | Sales workers                                       | (4) [4]            | Sales workers                                       | (4) [4]            | Sales workers                                                               | (4) [4]            | Sales workers                             |
| (5) [7]            | Farmers, Lumbermen and fishermen                    | (5) [7]            | Agricultural, forestry and fisheries workers        | (5) [5]            | Service workers                                                             | (5) [5]            | Service workers                           |
| (6) [9]            | Workers in mining and quarrying occupations         | (6) [9]            | Mining workers                                      | (6) [6]            | Protective service workers                                                  | (6) [6]            | Security workers                          |
| (7) [8]            | Workers in transport and communications occupations | (7) [8]            | Workers in transport and communications occupations | (7) [7]            | Agricultural, forestry and fisheries workers                                | (7) [7]            | Agriculture, forestry and fishery workers |
| (8) [9]            | Craftsmen, production process workers and labourers | (8) [9]            | Craftsmen, production process workers and labours   | (8) [8]            | Workers in transport and communications occupations                         | (8) [8]            | Transport and communication workers       |
| (9) [6]            | Protective service workers                          | (9) [6]            | Protective service workers                          | (9) [9]            | Craftsmen, mining, production process and construction workers and laborers | (9) [9]            | Production process and related workers    |
| (10) [5]           | Service workers                                     | (10) [5]           | Service workers                                     | (10) [10]          | Workers not classifiable by occupation                                      | (10) [10]          | Workers not classifiable by occupation    |
| (11) [10]          | Unclassifiable                                      | (11) [10]          | Workers not classifiable by occupation              | (11) [11]          | Non-employed <sup>c</sup>                                                   | (11) [11]          | Non-employed <sup>c</sup>                 |
| (12) [11]          | Non-employed <sup>c</sup>                           | (11) [11]          | Non-employed <sup>c</sup>                           |                    |                                                                             |                    |                                           |

<sup>a</sup> We consistently used occupation (major group) of the 4th revision. The number in square brackets is the classification used in this present study.

<sup>b</sup> When showing geographic inequality by occupation, we summarized these 11 occupation into six groups as follows:

- I. Clerical, technical and managerial occupations: (1) specialist and technical workers, (2) administrative and managerial workers, and (3) clerical workers
- II. Sales and service occupations: (4) sales workers, (5) service workers, and (6) security workers
- III. Agriculture, forestry and fishery occupations: (7) agriculture, forestry and fishery workers
- IV. Production and transport occupations: (8) transport and communication workers and (9) production process and related workers
- V. Unclassifiable occupations: (10) workers not classifiable by occupation
- VI. Non-employed: (11) non-employed

<sup>c</sup> Non-employed refers to the sum of unemployed and non-labour force in line with the *Report of Vital Statistics: Occupational and Industrial Aspects*.

**Supplementary Table 2.** Description of data in 47 prefectures, Japan, 1970-2005

|                         | Men           |                  |                                         |         | Women         |                  |                                         |         |
|-------------------------|---------------|------------------|-----------------------------------------|---------|---------------|------------------|-----------------------------------------|---------|
|                         | No. of deaths | Total population | Mortality rate per 100,000 <sup>a</sup> |         | No. of deaths | Total population | Mortality rate per 100,000 <sup>a</sup> |         |
|                         |               |                  |                                         | (SD)    |               |                  |                                         | (SD)    |
| Overall                 | 984,022       | 251,576,351      | 1,569                                   | (6,718) | 532,223       | 259,688,353      | 758                                     | (3,914) |
| Prefectures             |               |                  |                                         |         |               |                  |                                         |         |
| 1 Hokkaido              | 49,247        | 11,489,095       | 1,870                                   | (7,692) | 26,436        | 12,394,724       | 886                                     | (4,366) |
| 2 Aomori                | 15,202        | 2,959,355        | 1,531                                   | (6,760) | 7,282         | 3,248,812        | 471                                     | (2,143) |
| 3 Iwate                 | 13,258        | 2,856,175        | 2,187                                   | (9,429) | 6,959         | 3,067,651        | 864                                     | (4,827) |
| 4 Miyagi                | 17,042        | 4,448,360        | 1,412                                   | (5,469) | 9,137         | 4,625,004        | 728                                     | (3,064) |
| 5 Akita                 | 12,371        | 2,512,525        | 1,410                                   | (5,569) | 6,168         | 2,740,415        | 561                                     | (3,178) |
| 6 Yamagata              | 10,748        | 2,553,156        | 1,863                                   | (8,426) | 5,824         | 2,679,130        | 978                                     | (4,649) |
| 7 Fukushima             | 18,520        | 4,200,931        | 1,368                                   | (4,958) | 9,601         | 4,341,831        | 454                                     | (1,655) |
| 8 Ibaraki               | 23,125        | 5,779,563        | 1,101                                   | (3,644) | 12,135        | 5,665,132        | 511                                     | (2,853) |
| 9 Tochigi               | 16,375        | 3,976,411        | 1,643                                   | (6,942) | 8,590         | 3,941,144        | 876                                     | (3,381) |
| 10 Gunma                | 15,506        | 4,036,944        | 1,704                                   | (6,946) | 8,651         | 4,069,213        | 532                                     | (2,058) |
| 11 Saitama              | 43,148        | 13,129,693       | 1,436                                   | (5,956) | 23,114        | 12,774,631       | 519                                     | (1,419) |
| 12 Chiba                | 39,273        | 11,279,717       | 1,247                                   | (4,401) | 19,925        | 11,073,425       | 652                                     | (3,696) |
| 13 Tokyo                | 91,194        | 25,686,395       | 1,374                                   | (5,119) | 49,601        | 25,677,746       | 598                                     | (1,754) |
| 14 Kanagawa             | 54,947        | 16,940,375       | 1,330                                   | (5,569) | 28,202        | 16,194,532       | 1,053                                   | (5,584) |
| 15 Niigata              | 21,083        | 5,083,511        | 1,945                                   | (7,533) | 10,861        | 5,245,859        | 714                                     | (3,398) |
| 16 Toyama               | 9,238         | 2,300,243        | 1,606                                   | (7,190) | 5,250         | 2,429,822        | 980                                     | (5,406) |
| 17 Ishikawa             | 8,670         | 2,301,490        | 1,655                                   | (7,956) | 5,013         | 2,447,439        | 953                                     | (6,194) |
| 18 Fukui                | 5,611         | 1,643,881        | 1,677                                   | (7,209) | 3,556         | 1,721,279        | 1,391                                   | (7,473) |
| 19 Yamanashi            | 7,183         | 1,720,587        | 1,436                                   | (5,625) | 3,727         | 1,754,097        | 719                                     | (3,804) |
| 20 Nagano               | 15,876        | 4,393,794        | 2,175                                   | (8,828) | 9,505         | 4,551,945        | 853                                     | (4,017) |
| 21 Gifu                 | 14,957        | 4,139,225        | 1,515                                   | (6,609) | 9,222         | 4,333,798        | 913                                     | (4,421) |
| 22 Shizuoka             | 28,057        | 7,639,953        | 1,962                                   | (8,756) | 14,720        | 7,674,935        | 565                                     | (1,736) |
| 23 Aichi                | 46,925        | 14,066,571       | 1,626                                   | (7,368) | 26,699        | 13,817,272       | 764                                     | (2,784) |
| 24 Mie                  | 14,118        | 3,624,980        | 1,408                                   | (5,186) | 7,828         | 3,794,338        | 583                                     | (2,379) |
| 25 Shiga                | 8,125         | 2,428,751        | 1,453                                   | (5,976) | 4,883         | 2,465,170        | 782                                     | (3,805) |
| 26 Kyoto                | 18,723        | 5,109,042        | 1,166                                   | (3,889) | 11,146        | 5,465,224        | 464                                     | (2,094) |
| 27 Osaka                | 73,055        | 18,232,091       | 1,964                                   | (7,462) | 38,671        | 18,808,092       | 1,109                                   | (4,676) |
| 28 Hyogo                | 44,110        | 10,970,009       | 1,940                                   | (7,967) | 23,963        | 11,550,437       | 798                                     | (3,145) |
| 29 Nara                 | 9,755         | 2,621,500        | 1,730                                   | (7,403) | 5,598         | 2,813,039        | 971                                     | (4,423) |
| 30 Wakayama             | 10,006        | 2,169,994        | 1,276                                   | (6,597) | 5,596         | 2,358,333        | 573                                     | (2,872) |
| 31 Tottori              | 5,687         | 1,212,157        | 2,055                                   | (8,746) | 2,862         | 1,295,687        | 695                                     | (3,717) |
| 32 Shimane              | 7,103         | 1,546,077        | 2,051                                   | (8,981) | 3,829         | 1,651,580        | 891                                     | (4,704) |
| 33 Okayama              | 15,296        | 3,828,579        | 1,991                                   | (8,329) | 8,127         | 4,043,112        | 720                                     | (3,298) |
| 34 Hiroshima            | 23,074        | 5,750,006        | 1,708                                   | (6,593) | 12,338        | 6,008,967        | 852                                     | (3,726) |
| 35 Yamaguchi            | 14,671        | 3,127,157        | 2,051                                   | (8,498) | 7,883         | 3,435,624        | 582                                     | (2,276) |
| 36 Tokushima            | 7,871         | 1,661,674        | 711                                     | (1,797) | 4,406         | 1,786,025        | 454                                     | (1,935) |
| 37 Kagawa               | 8,494         | 2,052,654        | 999                                     | (3,529) | 4,743         | 2,182,213        | 551                                     | (3,159) |
| 38 Ehime                | 13,813        | 2,961,350        | 2,209                                   | (8,794) | 7,631         | 3,279,967        | 781                                     | (3,189) |
| 39 Kochi                | 8,686         | 1,627,246        | 1,004                                   | (3,355) | 4,403         | 1,792,884        | 353                                     | (1,777) |
| 40 Fukuoka              | 41,386        | 9,316,985        | 1,349                                   | (5,374) | 22,159        | 10,313,913       | 790                                     | (3,359) |
| 41 Saga                 | 7,618         | 1,664,620        | 1,458                                   | (7,446) | 4,307         | 1,844,827        | 1,057                                   | (6,718) |
| 42 Nagasaki             | 14,563        | 2,995,173        | 1,398                                   | (5,680) | 8,010         | 3,346,375        | 813                                     | (4,295) |
| 43 Kumamoto             | 15,029        | 3,485,422        | 780                                     | (2,080) | 8,554         | 3,916,400        | 623                                     | (2,600) |
| 44 Oita                 | 10,691        | 2,389,418        | 1,658                                   | (6,904) | 6,345         | 2,691,272        | 834                                     | (3,893) |
| 45 Miyazaki             | 10,422        | 2,240,503        | 1,866                                   | (8,416) | 5,606         | 2,496,028        | 1,239                                   | (7,251) |
| 46 Kagoshima            | 16,626        | 3,369,654        | 1,329                                   | (5,321) | 9,565         | 3,795,497        | 859                                     | (3,649) |
| 47 Okinawa <sup>b</sup> | 7,544         | 2,053,359        | 1,046                                   | (5,404) | 3,592         | 2,083,513        | 722                                     | (4,594) |

SD; standard deviation

<sup>a</sup> Mortality rate was calculated on the basis of the means of the proportion of deaths for each prefecture across all cell types.<sup>b</sup> The data for Okinawa prefecture were not available in 1970.

**Supplementary Table 3.** The number (percentage) of total population in each occupation, Japan, 1970-2005

|                                           | 1970       |          | 1975       |          | 1980       |          | 1985       |          | 1990       |          | 1995       |          | 2000       |          | 2005       |          |
|-------------------------------------------|------------|----------|------------|----------|------------|----------|------------|----------|------------|----------|------------|----------|------------|----------|------------|----------|
| <i>Men</i>                                |            |          |            |          |            |          |            |          |            |          |            |          |            |          |            |          |
| Specialist and technical workers          | 1,835,895  | (7.32)   | 2,080,025  | (7.25)   | 2,306,830  | (7.51)   | 3,143,412  | (9.76)   | 3,637,515  | (10.95)  | 3,991,077  | (11.72)  | 4,221,683  | (12.27)  | 3,950,815  | (11.90)  |
| Administrative and managerial workers     | 1,797,390  | (7.17)   | 1,972,340  | (6.88)   | 2,210,783  | (7.19)   | 1,868,101  | (5.80)   | 1,998,511  | (6.01)   | 2,066,172  | (6.07)   | 1,305,093  | (3.79)   | 1,031,316  | (3.11)   |
| Clerical workers                          | 2,914,350  | (11.62)  | 3,674,725  | (12.81)  | 3,637,048  | (11.83)  | 3,857,022  | (11.98)  | 3,895,784  | (11.72)  | 3,906,006  | (11.47)  | 4,077,310  | (11.85)  | 4,093,124  | (12.33)  |
| Sales workers                             | 2,681,490  | (10.69)  | 3,508,340  | (12.23)  | 4,132,015  | (13.44)  | 4,509,884  | (14.00)  | 4,794,455  | (14.43)  | 5,044,836  | (14.82)  | 5,159,661  | (15.00)  | 4,716,064  | (14.21)  |
| Service workers                           | 738,725    | (2.95)   | 984,940    | (3.43)   | 1,027,910  | (3.34)   | 1,123,385  | (3.49)   | 1,202,319  | (3.62)   | 1,270,668  | (3.73)   | 1,381,504  | (4.02)   | 1,441,522  | (4.34)   |
| Security workers                          | 438,955    | (1.75)   | 520,720    | (1.82)   | 567,438    | (1.85)   | 615,053    | (1.91)   | 660,161    | (1.99)   | 706,462    | (2.08)   | 787,325    | (2.29)   | 832,148    | (2.51)   |
| Agriculture, forestry and fishery workers | 3,531,500  | (14.08)  | 2,849,180  | (9.94)   | 2,379,666  | (7.74)   | 2,112,513  | (6.56)   | 1,615,756  | (4.86)   | 1,199,620  | (3.52)   | 899,881    | (2.62)   | 823,066    | (2.48)   |
| Transport and communication workers       | 1,682,400  | (6.71)   | 1,972,390  | (6.88)   | 2,072,133  | (6.74)   | 1,997,137  | (6.2)    | 1,984,890  | (5.97)   | 2,020,393  | (5.93)   | 1,957,847  | (5.69)   | 1,794,551  | (5.41)   |
| Production process and related workers    | 8,428,675  | (33.61)  | 9,645,620  | (33.63)  | 10,682,007 | (34.76)  | 10,644,436 | (33.05)  | 10,985,461 | (33.06)  | 10,945,330 | (32.15)  | 10,762,241 | (31.28)  | 10,451,026 | (31.48)  |
| Workers not classifiable by occupation    | 6,725      | (0.03)   | 13,870     | (0.05)   | 22,474     | (0.07)   | 50,391     | (0.16)   | 115,015    | (0.35)   | 151,362    | (0.44)   | 294,663    | (0.86)   | 502,667    | (1.51)   |
| Non-employed <sup>a</sup>                 | 1,024,357  | (4.08)   | 1,456,032  | (5.08)   | 1,696,114  | (5.52)   | 2,283,403  | (7.09)   | 2,339,703  | (7.04)   | 2,744,327  | (8.06)   | 3,559,611  | (10.35)  | 3,559,611  | (10.72)  |
| Total                                     | 25,080,462 | (100.00) | 28,678,182 | (100.00) | 30,734,418 | (100.00) | 32,204,737 | (100.00) | 33,229,570 | (100.00) | 34,046,253 | (100.00) | 34,406,819 | (100.00) | 33,195,910 | (100.00) |
| <i>Women</i>                              |            |          |            |          |            |          |            |          |            |          |            |          |            |          |            |          |
| Specialist and technical workers          | 800,245    | (3.00)   | 1,121,045  | (3.73)   | 1,507,610  | (4.72)   | 1,891,400  | (5.73)   | 2,250,231  | (6.69)   | 2,684,971  | (7.83)   | 3,094,599  | (8.87)   | 3,459,894  | (9.83)   |
| Administrative and managerial workers     | 86,615     | (0.32)   | 105,985    | (0.35)   | 155,251    | (0.49)   | 171,782    | (0.52)   | 184,219    | (0.55)   | 199,894    | (0.58)   | 142,983    | (0.41)   | 123,283    | (0.35)   |
| Clerical workers                          | 1,694,870  | (6.36)   | 2,753,760  | (9.16)   | 3,369,822  | (10.56)  | 4,248,922  | (12.86)  | 5,155,485  | (15.32)  | 5,748,954  | (16.76)  | 6,289,031  | (18.03)  | 6,422,961  | (18.25)  |
| Sales workers                             | 1,885,440  | (7.07)   | 2,152,320  | (7.16)   | 2,586,857  | (8.11)   | 2,447,212  | (7.41)   | 2,534,197  | (7.53)   | 2,702,863  | (7.88)   | 2,618,387  | (7.51)   | 2,561,132  | (7.28)   |
| Service workers                           | 1,634,865  | (6.13)   | 1,974,925  | (6.57)   | 2,106,305  | (6.60)   | 2,173,931  | (6.58)   | 2,263,285  | (6.73)   | 2,516,848  | (7.34)   | 2,825,178  | (8.10)   | 3,207,147  | (9.11)   |
| Security workers                          | 5,830      | (0.02)   | 8,010      | (0.03)   | 9,876      | (0.03)   | 12,390     | (0.04)   | 16,562     | (0.05)   | 24,289     | (0.07)   | 37,414     | (0.11)   | 43,158     | (0.12)   |
| Agriculture, forestry and fishery workers | 4,558,975  | (17.10)  | 3,154,040  | (10.49)  | 2,471,427  | (7.75)   | 2,029,368  | (6.14)   | 1,478,304  | (4.39)   | 1,055,672  | (3.08)   | 755,524    | (2.17)   | 600,419    | (1.71)   |
| Transport and communication workers       | 99,570     | (0.37)   | 108,500    | (0.36)   | 108,205    | (0.34)   | 96,205     | (0.29)   | 84,717     | (0.25)   | 93,936     | (0.27)   | 92,226     | (0.26)   | 85,394     | (0.24)   |
| Production process and related workers    | 3,546,495  | (13.30)  | 3,691,205  | (12.28)  | 4,456,927  | (13.97)  | 4,911,261  | (14.87)  | 5,158,278  | (15.33)  | 4,862,147  | (14.17)  | 4,664,292  | (13.37)  | 4,228,532  | (12.01)  |
| Workers not classifiable by occupation    | 5,285      | (0.02)   | 34,995     | (0.12)   | 24,186     | (0.08)   | 66,917     | (0.20)   | 89,544     | (0.27)   | 121,135    | (0.35)   | 223,913    | (0.64)   | 327,266    | (0.93)   |
| Non-employed <sup>a</sup>                 | 12,339,091 | (46.29)  | 14,949,973 | (49.74)  | 15,110,843 | (47.36)  | 14,978,370 | (45.35)  | 14,434,745 | (42.90)  | 14,296,062 | (41.67)  | 14,141,088 | (40.54)  | 14,141,088 | (40.17)  |
| Total                                     | 26,657,281 | (100.00) | 30,054,758 | (100.00) | 31,907,309 | (100.00) | 33,027,758 | (100.00) | 33,649,567 | (100.00) | 34,306,771 | (100.00) | 34,884,635 | (100.00) | 35,200,274 | (100.00) |

<sup>a</sup> Non-employed is the sum of unemployed and non-labour force.





**Supplementary Table 5. Age-adjusted mortality rate per 100,000 in each occupation, Japan, 1970-2005 <sup>a</sup>**

|                                           | 1970   | 1975   | 1980   | 1985  | 1990  | 1995  | 2000  | 2005  |
|-------------------------------------------|--------|--------|--------|-------|-------|-------|-------|-------|
| <i>Men</i>                                |        |        |        |       |       |       |       |       |
| Specialist and technical workers          | 340    | 282    | 319    | 257   | 234   | 223   | 312   | 231   |
| Administrative and managerial workers     | 233    | 223    | 192    | 215   | 193   | 170   | 248   | 241   |
| Clerical workers                          | 460    | 366    | 298    | 267   | 253   | 207   | 146   | 95    |
| Sales workers                             | 547    | 444    | 370    | 322   | 246   | 187   | 146   | 113   |
| Service workers                           | 515    | 389    | 488    | 426   | 476   | 442   | 401   | 348   |
| Security workers                          | 295    | 259    | 238    | 226   | 228   | 189   | 161   | 159   |
| Agriculture, forestry and fishery workers | 571    | 489    | 442    | 425   | 384   | 365   | 346   | 287   |
| Transport and communication workers       | 449    | 339    | 328    | 276   | 253   | 230   | 200   | 180   |
| Production process and related workers    | 415    | 327    | 250    | 216   | 181   | 156   | 105   | 89    |
| Workers not classifiable by occupation    | 14,668 | 15,038 | 20,796 | 9,141 | 5,935 | 7,231 | 4,900 | 768   |
| Non-employed <sup>b</sup>                 | 2,669  | 2,226  | 1,891  | 1,648 | 1,774 | 1,533 | 1,289 | 1,313 |
| <i>Women</i>                              |        |        |        |       |       |       |       |       |
| Specialist and technical workers          | 246    | 181    | 146    | 126   | 115   | 90    | 97    | 66    |
| Administrative and managerial workers     | 548    | 452    | 239    | 268   | 337   | 263   | 345   | 306   |
| Clerical workers                          | 234    | 153    | 105    | 83    | 68    | 54    | 39    | 29    |
| Sales workers                             | 197    | 164    | 137    | 135   | 111   | 81    | 68    | 55    |
| Service workers                           | 160    | 117    | 130    | 111   | 111   | 92    | 78    | 60    |
| Security workers                          | 1,615  | 1,027  | 822    | 1,335 | 991   | 508   | 398   | 390   |
| Agriculture, forestry and fishery workers | 256    | 224    | 172    | 148   | 133   | 114   | 103   | 85    |
| Transport and communication workers       | 899    | 585    | 844    | 712   | 808   | 440   | 324   | 278   |
| Production process and related workers    | 145    | 114    | 73     | 67    | 60    | 43    | 32    | 25    |
| Workers not classifiable by occupation    | 4,769  | 1,533  | 6,995  | 3,024 | 2,967 | 3,382 | 2,296 | 325   |
| Non-employed <sup>b</sup>                 | 489    | 387    | 324    | 286   | 256   | 254   | 242   | 222   |

<sup>a</sup> Age-adjusted mortality rates were calculated by the direct method, using the model population of 1985 in Japan as a reference.

<sup>b</sup> Non-employed is the sum of unemployed and non-labour force.

Supplementary Table 6. Adjusted prefecture-level residuals for all-cause premature mortality among men, Japan, 1970-2005

| Prefectures  | Overall |                |      | 1970 |                |      | 1975 |                |      | 1980 |                |      | 1985 |                |      | 1990 |                |      | 1995 |                |      | 2000 |                |      | 2005 |                |      |
|--------------|---------|----------------|------|------|----------------|------|------|----------------|------|------|----------------|------|------|----------------|------|------|----------------|------|------|----------------|------|------|----------------|------|------|----------------|------|
|              | OR      | (95% CI)       | Rank | OR   | (95% CI)       | Rank | OR   | (95% CI)       | Rank | OR   | (95% CI)       | Rank | OR   | (95% CI)       | Rank | OR   | (95% CI)       | Rank | OR   | (95% CI)       | Rank | OR   | (95% CI)       | Rank | OR   | (95% CI)       | Rank |
| 1 Hokkaido   | 1.02    | (0.98 to 1.06) | 31   | 1.02 | (0.99 to 1.05) | 28   | 1.05 | (1.02 to 1.08) | 37   | 1.05 | (1.02 to 1.09) | 40   | 1.01 | (0.98 to 1.04) | 26   | 0.97 | (0.94 to 0.99) | 10   | 1.01 | (0.98 to 1.04) | 26   | 1.05 | (1.01 to 1.08) | 33   | 1.06 | (1.02 to 1.11) | 36   |
| 2 Aomori     | 1.13    | (1.09 to 1.18) | 47   | 1.07 | (1.03 to 1.12) | 42   | 1.06 | (1.01 to 1.10) | 44   | 1.10 | (1.05 to 1.15) | 45   | 1.09 | (1.05 to 1.14) | 45   | 1.09 | (1.04 to 1.14) | 44   | 1.17 | (1.11 to 1.23) | 46   | 1.25 | (1.19 to 1.31) | 47   | 1.27 | (1.20 to 1.34) | 47   |
| 3 Iwate      | 1.07    | (1.03 to 1.11) | 45   | 1.09 | (1.04 to 1.13) | 44   | 1.04 | (0.99 to 1.08) | 35   | 1.04 | (0.99 to 1.09) | 37   | 1.02 | (0.98 to 1.07) | 36   | 1.06 | (1.01 to 1.11) | 43   | 1.05 | (0.99 to 1.10) | 34   | 1.08 | (1.03 to 1.15) | 40   | 1.22 | (1.15 to 1.29) | 46   |
| 4 Miyagi     | 0.97    | (0.93 to 1.01) | 14   | 0.94 | (0.90 to 0.98) | 4    | 0.97 | (0.93 to 1.01) | 11   | 0.96 | (0.92 to 1.00) | 8    | 0.94 | (0.91 to 0.98) | 4    | 0.98 | (0.94 to 1.02) | 14   | 0.97 | (0.92 to 1.01) | 14   | 0.99 | (0.94 to 1.04) | 20   | 1.04 | (0.99 to 1.10) | 31   |
| 5 Akita      | 1.07    | (1.02 to 1.11) | 44   | 1.12 | (1.07 to 1.17) | 46   | 1.06 | (1.01 to 1.10) | 43   | 1.04 | (0.99 to 1.09) | 36   | 1.01 | (0.97 to 1.06) | 29   | 1.01 | (0.96 to 1.06) | 28   | 1.10 | (1.04 to 1.16) | 44   | 1.09 | (1.03 to 1.15) | 43   | 1.17 | (1.10 to 1.24) | 45   |
| 6 Yamagata   | 0.99    | (0.95 to 1.03) | 20   | 1.02 | (0.97 to 1.07) | 27   | 1.00 | (0.95 to 1.05) | 22   | 1.00 | (0.95 to 1.05) | 20   | 0.94 | (0.90 to 0.99) | 3    | 0.97 | (0.92 to 1.02) | 13   | 0.97 | (0.92 to 1.03) | 17   | 1.00 | (0.94 to 1.07) | 23   | 1.06 | (0.99 to 1.13) | 34   |
| 7 Fukushima  | 1.04    | (1.00 to 1.08) | 37   | 1.02 | (0.98 to 1.07) | 29   | 1.02 | (0.98 to 1.06) | 31   | 1.00 | (0.96 to 1.05) | 25   | 1.01 | (0.97 to 1.05) | 31   | 1.01 | (0.97 to 1.06) | 29   | 1.06 | (1.01 to 1.11) | 37   | 1.09 | (1.03 to 1.14) | 41   | 1.14 | (1.08 to 1.20) | 44   |
| 8 Ibaraki    | 1.02    | (0.98 to 1.07) | 34   | 1.03 | (0.99 to 1.07) | 32   | 1.01 | (0.98 to 1.05) | 27   | 1.01 | (0.97 to 1.05) | 30   | 1.02 | (0.98 to 1.06) | 34   | 1.03 | (0.99 to 1.07) | 36   | 1.07 | (1.03 to 1.12) | 40   | 1.03 | (0.99 to 1.07) | 30   | 1.03 | (0.98 to 1.08) | 24   |
| 9 Tochigi    | 1.07    | (1.03 to 1.11) | 43   | 1.09 | (1.04 to 1.14) | 45   | 1.05 | (1.01 to 1.10) | 41   | 1.06 | (1.02 to 1.11) | 42   | 1.09 | (1.05 to 1.14) | 46   | 1.11 | (1.07 to 1.16) | 47   | 1.09 | (1.04 to 1.14) | 43   | 1.06 | (1.01 to 1.11) | 35   | 1.04 | (0.98 to 1.09) | 28   |
| 10 Gunma     | 1.01    | (0.97 to 1.06) | 28   | 1.02 | (0.97 to 1.06) | 26   | 0.97 | (0.93 to 1.02) | 12   | 0.97 | (0.93 to 1.02) | 11   | 1.04 | (0.99 to 1.08) | 39   | 1.00 | (0.96 to 1.05) | 24   | 1.06 | (1.01 to 1.11) | 38   | 1.02 | (0.97 to 1.07) | 26   | 1.04 | (0.99 to 1.10) | 29   |
| 11 Saitama   | 0.96    | (0.92 to 1.00) | 9    | 1.00 | (0.97 to 1.04) | 22   | 0.98 | (0.94 to 1.01) | 14   | 0.98 | (0.94 to 1.01) | 15   | 0.99 | (0.96 to 1.02) | 19   | 1.00 | (0.97 to 1.03) | 26   | 0.93 | (0.90 to 0.97) | 10   | 0.91 | (0.88 to 0.94) | 8    | 0.86 | (0.83 to 0.90) | 6    |
| 12 Chiba     | 0.96    | (0.92 to 1.00) | 8    | 0.98 | (0.95 to 1.01) | 18   | 0.94 | (0.91 to 0.97) | 5    | 0.95 | (0.92 to 0.99) | 6    | 0.99 | (0.95 to 1.02) | 17   | 0.99 | (0.96 to 1.02) | 19   | 0.93 | (0.90 to 0.96) | 7    | 0.91 | (0.88 to 0.94) | 7    | 0.93 | (0.89 to 0.97) | 12   |
| 13 Tokyo     | 0.99    | (0.95 to 1.03) | 19   | 0.96 | (0.93 to 0.98) | 16   | 0.97 | (0.95 to 1.00) | 13   | 1.00 | (0.97 to 1.02) | 21   | 1.01 | (0.99 to 1.03) | 28   | 1.06 | (1.03 to 1.08) | 41   | 0.93 | (0.90 to 0.96) | 8    | 0.91 | (0.88 to 0.94) | 6    | 0.97 | (0.94 to 1.01) | 16   |
| 14 Kanagawa  | 0.94    | (0.90 to 0.98) | 5    | 0.95 | (0.92 to 0.98) | 11   | 0.89 | (0.86 to 0.92) | 2    | 0.89 | (0.86 to 0.91) | 2    | 0.99 | (0.96 to 1.02) | 18   | 1.02 | (0.99 to 1.05) | 31   | 0.93 | (0.90 to 0.96) | 6    | 0.89 | (0.86 to 0.92) | 5    | 0.83 | (0.80 to 0.87) | 2    |
| 15 Niigata   | 1.02    | (0.98 to 1.07) | 33   | 1.00 | (0.96 to 1.04) | 21   | 1.01 | (0.98 to 1.05) | 28   | 1.00 | (0.96 to 1.04) | 22   | 1.02 | (0.98 to 1.06) | 33   | 0.98 | (0.95 to 1.02) | 16   | 1.07 | (1.02 to 1.12) | 39   | 1.10 | (1.05 to 1.15) | 45   | 1.06 | (1.01 to 1.11) | 35   |
| 16 Toyama    | 1.05    | (1.00 to 1.09) | 40   | 1.03 | (0.98 to 1.08) | 31   | 1.04 | (0.99 to 1.09) | 36   | 1.04 | (0.98 to 1.09) | 35   | 1.09 | (1.04 to 1.15) | 47   | 1.05 | (1.00 to 1.11) | 39   | 0.94 | (0.88 to 1.02) | 11   | 1.10 | (1.03 to 1.17) | 44   | 1.13 | (1.06 to 1.21) | 42   |
| 17 Ishikawa  | 1.00    | (0.96 to 1.04) | 23   | 0.99 | (0.94 to 1.04) | 19   | 1.01 | (0.96 to 1.07) | 26   | 1.03 | (0.97 to 1.09) | 34   | 0.97 | (0.92 to 1.02) | 9    | 0.97 | (0.91 to 1.02) | 11   | 0.94 | (0.88 to 1.00) | 12   | 1.03 | (0.97 to 1.10) | 31   | 1.10 | (1.03 to 1.18) | 41   |
| 18 Fukui     | 0.93    | (0.89 to 0.98) | 4    | 0.91 | (0.86 to 0.97) | 2    | 0.96 | (0.91 to 1.02) | 9    | 0.89 | (0.84 to 0.95) | 3    | 0.97 | (0.92 to 1.03) | 11   | 0.93 | (0.87 to 0.99) | 4    | 0.87 | (0.81 to 0.94) | 2    | 0.99 | (0.92 to 1.07) | 21   | 1.03 | (0.95 to 1.12) | 25   |
| 19 Yamanashi | 1.07    | (1.02 to 1.11) | 42   | 1.04 | (0.98 to 1.10) | 34   | 1.00 | (0.95 to 1.06) | 23   | 1.07 | (1.01 to 1.14) | 43   | 1.06 | (1.00 to 1.12) | 43   | 1.09 | (1.03 to 1.16) | 45   | 1.11 | (1.04 to 1.18) | 45   | 1.06 | (0.99 to 1.13) | 36   | 1.09 | (1.02 to 1.18) | 40   |
| 20 Nagano    | 0.97    | (0.93 to 1.01) | 11   | 0.93 | (0.90 to 0.97) | 4    | 0.98 | (0.94 to 1.02) | 15   | 0.95 | (0.90 to 0.99) | 6    | 0.98 | (0.94 to 1.02) | 13   | 0.94 | (0.89 to 0.98) | 6    | 0.98 | (0.93 to 1.03) | 18   | 1.00 | (0.95 to 1.05) | 22   | 1.03 | (0.98 to 1.09) | 26   |
| 21 Gifu      | 1.01    | (0.97 to 1.05) | 26   | 0.89 | (0.85 to 0.93) | 1    | 1.01 | (0.97 to 1.06) | 25   | 0.97 | (0.93 to 1.02) | 13   | 1.05 | (1.01 to 1.10) | 42   | 1.02 | (0.98 to 1.07) | 33   | 1.01 | (0.96 to 1.06) | 27   | 1.07 | (1.02 to 1.12) | 37   | 1.07 | (1.02 to 1.13) | 37   |
| 22 Shizuoka  | 1.01    | (0.97 to 1.05) | 27   | 0.97 | (0.94 to 1.01) | 17   | 0.99 | (0.95 to 1.02) | 19   | 1.03 | (0.99 to 1.07) | 33   | 1.04 | (1.00 to 1.08) | 40   | 1.04 | (1.00 to 1.07) | 37   | 1.05 | (1.01 to 1.09) | 32   | 1.01 | (0.97 to 1.05) | 24   | 0.99 | (0.94 to 1.03) | 18   |
| 23 Aichi     | 0.99    | (0.95 to 1.03) | 18   | 0.95 | (0.92 to 0.98) | 13   | 0.94 | (0.91 to 0.97) | 4    | 0.95 | (0.92 to 0.98) | 7    | 0.98 | (0.95 to 1.01) | 15   | 1.00 | (0.97 to 1.03) | 21   | 1.03 | (1.00 to 1.07) | 31   | 1.02 | (0.99 to 1.06) | 27   | 1.04 | (1.00 to 1.08) | 30   |
| 24 Mie       | 0.97    | (0.93 to 1.01) | 15   | 0.94 | (0.90 to 0.98) | 6    | 0.96 | (0.92 to 1.01) | 7    | 0.96 | (0.92 to 1.01) | 9    | 0.98 | (0.93 to 1.02) | 12   | 1.00 | (0.96 to 1.05) | 25   | 1.02 | (0.97 to 1.07) | 29   | 0.99 | (0.94 to 1.04) | 19   | 0.99 | (0.94 to 1.05) | 19   |
| 25 Shiga     | 0.93    | (0.89 to 0.97) | 3    | 0.95 | (0.90 to 1.01) | 12   | 0.96 | (0.91 to 1.02) | 10   | 1.00 | (0.94 to 1.06) | 19   | 0.96 | (0.91 to 1.01) | 7    | 0.97 | (0.92 to 1.02) | 12   | 0.94 | (0.88 to 1.00) | 13   | 0.84 | (0.79 to 0.90) | 1    | 0.88 | (0.82 to 0.94) | 8    |
| 26 Kyoto     | 0.95    | (0.91 to 0.99) | 7    | 0.94 | (0.91 to 0.98) | 8    | 0.96 | (0.93 to 1.00) | 8    | 0.97 | (0.93 to 1.01) | 12   | 0.95 | (0.92 to 0.99) | 5    | 0.93 | (0.90 to 0.97) | 5    | 0.87 | (0.84 to 0.91) | 3    | 0.94 | (0.90 to 0.98) | 12   | 0.94 | (0.89 to 0.99) | 15   |
| 27 Osaka     | 1.02    | (0.98 to 1.06) | 32   | 1.04 | (1.01 to 1.07) | 36   | 1.02 | (0.99 to 1.05) | 30   | 1.05 | (1.02 to 1.08) | 39   | 1.07 | (1.04 to 1.09) | 44   | 1.09 | (1.07 to 1.12) | 46   | 1.02 | (0.99 to 1.05) | 28   | 0.97 | (0.94 to 1.00) | 14   | 0.84 | (0.81 to 0.88) | 4    |
| 28 Hyogo     | 1.00    | (0.96 to 1.04) | 22   | 1.01 | (0.98 to 1.04) | 24   | 1.02 | (0.99 to 1.05) | 32   | 1.02 | (0.99 to 1.06) | 32   | 1.01 | (0.98 to 1.04) | 30   | 1.03 | (1.00 to 1.06) | 35   | 0.99 | (0.96 to 1.02) | 20   | 0.92 | (0.89 to 0.95) | 11   | 0.90 | (0.86 to 0.93) | 10   |
| 29 Nara      | 0.94    | (0.90 to 0.98) | 6    | 0.93 | (0.88 to 0.98) | 3    | 0.98 | (0.93 to 1.03) | 16   | 0.96 | (0.91 to 1.02) | 10   | 1.00 | (0.95 to 1.05) | 21   | 1.01 | (0.96 to 1.06) | 27   | 0.91 | (0.86 to 0.96) | 5    | 0.85 | (0.80 to 0.89) | 2    | 0.81 | (0.76 to 0.86) | 1    |
| 30 Wakayama  | 0.99    | (0.95 to 1.04) | 21   | 0.95 | (0.91 to 1.00) | 14   | 0.96 | (0.92 to 1.01) | 6    | 1.01 | (0.95 to 1.06) | 27   | 0.98 | (0.93 to 1.03) | 14   | 1.00 | (0.95 to 1.05) | 22   | 0.98 | (0.93 to 1.04) | 19   | 1.01 | (0.96 to 1.08) | 25   | 1.02 | (0.96 to 1.09) | 22   |
| 31 Tottori   | 1.08    | (1.03 to 1.12) | 46   | 1.06 | (0.99 to 1.12) | 39   | 1.00 | (0.94 to 1.06) | 20   | 1.09 | (1.02 to 1.16) | 44   | 1.00 | (0.95 to 1.07) | 25   | 1.05 | (0.99 to 1.12) | 38   | 1.22 | (1.13 to 1.30) | 47   | 1.08 | (1.00 to 1.16) | 38   | 1.14 | (1.05 to 1.23) | 43   |
| 32 Shimane   | 1.05    | (1.00 to 1.09) | 39   | 1.01 | (0.96 to 1.07) | 23   | 1.05 | (1.00 to 1.11) | 39   | 1.10 | (1.04 to 1.17) | 46   | 1.00 | (0.94 to 1.05) | 20   | 1.00 | (0.94 to 1.06) | 23   | 1.08 | (1.01 to 1.15) | 41   | 1.13 | (1.06 to 1.21) | 46   | 1.03 | (0.95 to 1.11) | 23   |
| 33 Okayama   | 0.97    | (0.93 to 1.01) | 10   | 0.94 | (0.90 to 0.98) | 7    | 1.00 | (0.96 to 1.04) | 21   | 0.99 | (0.94 to 1.03) | 16   | 1.00 | (0.96 to 1.04) | 24   | 1.02 | (0.98 to 1.06) | 32   | 1.00 | (0.95 to 1.04) | 23   | 0.98 | (0.93 to 1.03) | 16   | 0.84 | (0.79 to 0.89) | 3    |
| 34 Hiroshima | 1.00    | (0.96 to 1.05) | 25   | 1.04 | (1.00 to 1.08) | 35   | 1.05 | (1.01 to 1.09) | 38   | 1.00 | (0.96 to 1.04) | 24   | 1.05 | (1.01 to 1.09) | 41   | 1.02 | (0.98 to 1.05) | 30   | 1.05 | (1.01 to 1.10) | 36   | 0.97 | (0.93 to 1.02) | 15   | 0.87 | (0.82 to 0.91) | 7    |
| 35 Yamaguchi | 1.06    | (1.02 to 1.10) | 41   | 1.06 | (1.02 to 1.11) | 40   | 1.05 | (1.01 to 1.10) | 40   | 1.11 | (1.06 to 1.16) | 47   | 1.03 | (0.99 to 1.07) | 37   | 1.06 | (1.01 to 1.10) | 40   | 1.09 | (1.03 to 1.14) | 42   | 1.04 | (0.99 to 1.10) | 32   | 1.05 | (0.99 to 1.12) | 33   |
| 36 Tokushima | 0.97    | (0.93 to 1.01) | 12   | 1.03 | (0.98 to 1.09) | 33   | 1.01 | (0.96 to 1.06) | 24   | 1.01 | (0.96 to 1.07) | 31   | 0.97 | (0.92 to 1.02) | 10   | 0.92 | (0.87 to 0.97) | 3    | 0.93 | (0.87 to 0.99) | 9    | 0.89 | (0.83 to 0.95) | 4    | 0.99 | (0.92 to 1.07) | 20   |
| 37 Kagawa    | 0.98    | (0.94 to 1.03) | 17   | 1.01 | (0.96 to 1.07) | 25   | 0.98 | (0.93 to 1.04) | 18   | 0.98 | (0.92 to 1.03) | 14   | 0.96 | (0.91 to 1.01) | 6    | 0.99 | (0.94 to 1.05) | 20   | 1.00 | (0.94 to 1.06) | 24   | 0.98 | (0.92 to 1.04) | 17   | 0.99 | (0.93 to 1.06) | 21   |
| 38 Ehime     | 1.02    | (0.97 to 1.06) | 30   | 1.03 | (0.98 to 1.07) | 30   | 1.03 | (0.99 to 1.08) | 34   | 1.01 | (0.96 to 1.05) | 28   | 1.00 | (0.96 to 1.04) | 22   | 0.99 | (0.94 to 1.03) | 18   | 1.05 | (0.99 to 1.10) | 33   | 1.08 | (1.03 to 1.14) | 39   | 0.97 | (0.92 to 1.03) | 17   |
| 39 Kochi     | 1.03    | (0.98 to 1.07) | 35   | 1.07 | (1.02 to 1.13) | 41   | 1.06 | (1.00 to 1.11) | 46   | 1.05 | (1.00 to 1.11) | 41   | 0.98 | (0.93 to 1.04) | 16   | 0.94 | (0.89 to 0.99) | 8    | 0.99 | (0.93 to 1.06) | 22   | 1.03 | (0.96 to 1.09) | 28   | 1.08 | (1.00 to 1.15) | 39   |
| 40 Fukuoka   | 0.98    | (0.94 to 1.02) | 16   | 0.95 | (0.92 to 0.97) | 9    | 0.98 | (0.95 to 1.01) | 17   | 0.99 | (0.96 to 1.02) | 17   | 1.00 | (0.97 to 1.03) | 23   | 1.02 | (0.99 to 1.06) | 34   | 0.99 | (0.96 to 1.03) | 21   | 0.96 | (0.92 to 0.99) | 13   | 0.94 | (0.90 to 0.98) | 13   |
| 41 Saga      | 1.04    | (1.00 to 1.09) | 38   | 0.96 | (0.90 to 1.01) | 15   | 1.09 | (1.03 to 1.15) | 47   | 1.00 | (0.95 to 1.06) | 26   | 1.02 | (0.96 to 1.08) | 32   | 1.06 | (1.00 to 1.12) | 42   | 1.05 | (0.98 to 1.12) | 35   | 1.09 | (1.02 to 1.16) | 42   | 1    |                |      |

**Supplementary Table 7. Adjusted prefecture-level residuals for all-cause premature mortality among women, Japan, 1970-2005**

| Prefectures  | Overall |                |      | 1970 |                |      | 1975 |                |      | 1980 |                |      | 1985 |                |      | 1990 |                |      | 1995 |                |      | 2000 |                |      | 2005 |                |      |
|--------------|---------|----------------|------|------|----------------|------|------|----------------|------|------|----------------|------|------|----------------|------|------|----------------|------|------|----------------|------|------|----------------|------|------|----------------|------|
|              | OR      | (95% CI)       | Rank | OR   | (95% CI)       | Rank | OR   | (95% CI)       | Rank | OR   | (95% CI)       | Rank | OR   | (95% CI)       | Rank | OR   | (95% CI)       | Rank | OR   | (95% CI)       | Rank | OR   | (95% CI)       | Rank | OR   | (95% CI)       | Rank |
| 1 Hokkaido   | 0.97    | (0.93 to 1.00) | 14   | 0.95 | (0.92 to 0.99) | 10   | 0.96 | (0.92 to 1.00) | 17   | 0.97 | (0.94 to 1.01) | 13   | 0.99 | (0.95 to 1.02) | 18   | 0.97 | (0.93 to 1.01) | 14   | 0.97 | (0.93 to 1.02) | 14   | 0.97 | (0.93 to 1.01) | 16   | 1.01 | (0.96 to 1.06) | 20   |
| 2 Aomori     | 1.04    | (1.00 to 1.08) | 31   | 0.98 | (0.93 to 1.04) | 15   | 0.99 | (0.93 to 1.05) | 20   | 1.00 | (0.95 to 1.07) | 23   | 1.05 | (0.99 to 1.11) | 40   | 1.01 | (0.95 to 1.08) | 23   | 1.07 | (1.00 to 1.15) | 38   | 1.11 | (1.03 to 1.19) | 42   | 1.13 | (1.05 to 1.22) | 43   |
| 3 Iwate      | 1.07    | (1.02 to 1.11) | 40   | 1.05 | (0.99 to 1.12) | 35   | 1.04 | (0.98 to 1.10) | 34   | 1.03 | (0.97 to 1.09) | 33   | 1.02 | (0.96 to 1.09) | 25   | 1.03 | (0.97 to 1.10) | 31   | 1.09 | (1.02 to 1.17) | 43   | 1.13 | (1.05 to 1.22) | 46   | 1.17 | (1.08 to 1.27) | 45   |
| 4 Miyagi     | 0.91    | (0.88 to 0.95) | 6    | 0.89 | (0.85 to 0.94) | 4    | 0.87 | (0.82 to 0.92) | 3    | 0.88 | (0.83 to 0.93) | 3    | 0.93 | (0.88 to 0.98) | 6    | 0.96 | (0.91 to 1.02) | 13   | 0.95 | (0.90 to 1.02) | 13   | 0.92 | (0.86 to 0.98) | 10   | 0.96 | (0.90 to 1.03) | 15   |
| 5 Akita      | 0.96    | (0.92 to 1.00) | 12   | 0.99 | (0.94 to 1.05) | 20   | 0.94 | (0.89 to 1.00) | 9    | 0.91 | (0.86 to 0.97) | 5    | 0.93 | (0.88 to 1.00) | 8    | 0.93 | (0.87 to 1.00) | 6    | 1.00 | (0.93 to 1.07) | 21   | 1.04 | (0.96 to 1.13) | 26   | 1.05 | (0.96 to 1.14) | 29   |
| 6 Yamagata   | 0.96    | (0.92 to 1.00) | 11   | 0.99 | (0.93 to 1.05) | 18   | 0.95 | (0.89 to 1.01) | 11   | 0.95 | (0.89 to 1.01) | 9    | 0.95 | (0.89 to 1.01) | 11   | 0.94 | (0.88 to 1.00) | 8    | 1.00 | (0.92 to 1.08) | 19   | 0.97 | (0.89 to 1.05) | 15   | 1.05 | (0.96 to 1.14) | 30   |
| 7 Fukushima  | 1.04    | (1.00 to 1.08) | 30   | 1.04 | (0.98 to 1.09) | 30   | 1.07 | (1.01 to 1.13) | 40   | 0.99 | (0.94 to 1.05) | 18   | 1.03 | (0.98 to 1.09) | 32   | 1.01 | (0.95 to 1.06) | 21   | 1.02 | (0.95 to 1.08) | 26   | 1.07 | (1.00 to 1.14) | 32   | 1.10 | (1.02 to 1.18) | 40   |
| 8 Ibaraki    | 1.04    | (1.00 to 1.08) | 33   | 1.08 | (1.03 to 1.14) | 42   | 1.02 | (0.96 to 1.07) | 28   | 1.01 | (0.96 to 1.06) | 27   | 1.04 | (0.99 to 1.10) | 36   | 1.06 | (1.01 to 1.12) | 43   | 1.07 | (1.01 to 1.13) | 37   | 0.99 | (0.94 to 1.05) | 19   | 1.05 | (0.98 to 1.11) | 31   |
| 9 Tochigi    | 1.09    | (1.05 to 1.13) | 44   | 1.09 | (1.03 to 1.15) | 43   | 1.05 | (0.99 to 1.11) | 38   | 1.06 | (1.00 to 1.13) | 40   | 1.13 | (1.07 to 1.20) | 47   | 1.09 | (1.03 to 1.16) | 46   | 1.04 | (0.98 to 1.11) | 29   | 1.11 | (1.04 to 1.19) | 43   | 1.09 | (1.01 to 1.17) | 38   |
| 10 Gunma     | 1.05    | (1.01 to 1.09) | 34   | 1.08 | (1.02 to 1.14) | 40   | 1.01 | (0.95 to 1.07) | 22   | 1.02 | (0.96 to 1.08) | 31   | 1.05 | (0.99 to 1.11) | 39   | 1.02 | (0.97 to 1.09) | 27   | 1.01 | (0.94 to 1.08) | 23   | 1.09 | (1.02 to 1.17) | 40   | 1.10 | (1.03 to 1.18) | 41   |
| 11 Saitama   | 0.92    | (0.88 to 0.95) | 7    | 0.94 | (0.90 to 0.98) | 9    | 0.92 | (0.88 to 0.96) | 6    | 0.91 | (0.88 to 0.95) | 6    | 0.95 | (0.91 to 0.99) | 10   | 0.96 | (0.92 to 1.00) | 12   | 0.92 | (0.88 to 0.96) | 9    | 0.89 | (0.85 to 0.93) | 7    | 0.84 | (0.80 to 0.88) | 4    |
| 12 Chiba     | 0.88    | (0.85 to 0.91) | 3    | 0.90 | (0.86 to 0.95) | 5    | 0.89 | (0.85 to 0.93) | 4    | 0.88 | (0.84 to 0.92) | 4    | 0.90 | (0.86 to 0.94) | 3    | 0.88 | (0.85 to 0.92) | 1    | 0.87 | (0.83 to 0.91) | 4    | 0.84 | (0.80 to 0.88) | 3    | 0.89 | (0.85 to 0.94) | 8    |
| 13 Tokyo     | 0.89    | (0.86 to 0.92) | 4    | 0.79 | (0.76 to 0.81) | 1    | 0.86 | (0.83 to 0.89) | 2    | 0.92 | (0.89 to 0.95) | 7    | 0.93 | (0.90 to 0.96) | 7    | 0.93 | (0.90 to 0.96) | 5    | 0.88 | (0.85 to 0.91) | 6    | 0.89 | (0.86 to 0.93) | 6    | 0.93 | (0.89 to 0.97) | 11   |
| 14 Kanagawa  | 0.84    | (0.81 to 0.87) | 1    | 0.79 | (0.76 to 0.82) | 2    | 0.82 | (0.78 to 0.85) | 1    | 0.85 | (0.82 to 0.88) | 1    | 0.87 | (0.84 to 0.91) | 2    | 0.89 | (0.86 to 0.92) | 3    | 0.86 | (0.82 to 0.89) | 3    | 0.83 | (0.79 to 0.86) | 2    | 0.80 | (0.76 to 0.84) | 2    |
| 15 Niigata   | 0.96    | (0.93 to 1.00) | 13   | 1.00 | (0.96 to 1.05) | 23   | 0.95 | (0.90 to 0.99) | 10   | 0.95 | (0.90 to 1.00) | 10   | 0.92 | (0.87 to 0.97) | 5    | 0.97 | (0.92 to 1.03) | 15   | 1.00 | (0.94 to 1.06) | 20   | 1.01 | (0.95 to 1.08) | 22   | 0.97 | (0.90 to 1.04) | 16   |
| 16 Toyama    | 1.06    | (1.01 to 1.10) | 38   | 1.08 | (1.02 to 1.15) | 41   | 1.04 | (0.97 to 1.11) | 35   | 1.02 | (0.95 to 1.09) | 29   | 1.03 | (0.96 to 1.10) | 29   | 1.01 | (0.94 to 1.08) | 22   | 1.01 | (0.93 to 1.09) | 24   | 1.15 | (1.06 to 1.25) | 47   | 1.13 | (1.04 to 1.24) | 44   |
| 17 Ishikawa  | 1.03    | (0.99 to 1.07) | 25   | 1.04 | (0.97 to 1.11) | 31   | 1.02 | (0.96 to 1.10) | 30   | 1.00 | (0.93 to 1.07) | 21   | 0.98 | (0.91 to 1.05) | 16   | 1.03 | (0.96 to 1.11) | 32   | 1.02 | (0.94 to 1.11) | 27   | 1.06 | (0.98 to 1.15) | 30   | 1.10 | (1.00 to 1.20) | 39   |
| 18 Fukui     | 1.05    | (1.00 to 1.10) | 35   | 1.07 | (1.00 to 1.15) | 38   | 1.01 | (0.94 to 1.09) | 25   | 1.06 | (0.98 to 1.15) | 41   | 1.02 | (0.95 to 1.11) | 27   | 1.04 | (0.96 to 1.12) | 35   | 0.91 | (0.83 to 1.00) | 8    | 1.07 | (0.97 to 1.18) | 33   | 1.18 | (1.06 to 1.30) | 46   |
| 19 Yamanashi | 1.01    | (0.97 to 1.06) | 23   | 1.00 | (0.93 to 1.07) | 22   | 1.00 | (0.93 to 1.08) | 21   | 0.99 | (0.92 to 1.07) | 19   | 1.03 | (0.96 to 1.12) | 33   | 0.99 | (0.91 to 1.07) | 19   | 1.05 | (0.96 to 1.15) | 32   | 1.03 | (0.94 to 1.13) | 25   | 1.02 | (0.92 to 1.13) | 23   |
| 20 Nagano    | 1.04    | (1.00 to 1.08) | 32   | 1.05 | (1.00 to 1.11) | 36   | 1.01 | (0.96 to 1.06) | 24   | 1.05 | (1.00 to 1.11) | 38   | 1.05 | (0.99 to 1.11) | 41   | 1.06 | (1.00 to 1.12) | 40   | 1.07 | (1.01 to 1.14) | 39   | 1.01 | (0.94 to 1.08) | 20   | 1.04 | (0.97 to 1.12) | 28   |
| 21 Gifu      | 1.11    | (1.07 to 1.16) | 46   | 1.02 | (0.97 to 1.08) | 26   | 1.10 | (1.04 to 1.17) | 43   | 1.15 | (1.09 to 1.22) | 47   | 1.11 | (1.05 to 1.17) | 45   | 1.08 | (1.02 to 1.15) | 45   | 1.14 | (1.08 to 1.22) | 46   | 1.11 | (1.04 to 1.18) | 41   | 1.12 | (1.04 to 1.20) | 42   |
| 22 Shizuoka  | 1.01    | (0.97 to 1.05) | 22   | 0.94 | (0.89 to 0.98) | 7    | 0.96 | (0.91 to 1.00) | 15   | 1.00 | (0.96 to 1.05) | 22   | 1.00 | (0.95 to 1.05) | 21   | 1.06 | (1.01 to 1.11) | 39   | 1.06 | (1.01 to 1.12) | 35   | 1.05 | (1.00 to 1.11) | 29   | 1.05 | (0.99 to 1.12) | 33   |
| 23 Aichi     | 1.03    | (0.99 to 1.07) | 24   | 0.98 | (0.94 to 1.02) | 13   | 1.01 | (0.97 to 1.05) | 23   | 1.04 | (1.00 to 1.08) | 34   | 1.07 | (1.03 to 1.11) | 43   | 1.04 | (1.00 to 1.08) | 38   | 1.06 | (1.02 to 1.11) | 34   | 1.02 | (0.98 to 1.07) | 24   | 1.04 | (0.99 to 1.09) | 27   |
| 24 Mie       | 0.98    | (0.94 to 1.02) | 19   | 0.99 | (0.93 to 1.04) | 16   | 0.93 | (0.88 to 0.99) | 8    | 0.97 | (0.92 to 1.03) | 14   | 0.99 | (0.93 to 1.05) | 19   | 0.94 | (0.89 to 1.00) | 10   | 1.01 | (0.95 to 1.08) | 25   | 1.06 | (0.99 to 1.14) | 31   | 0.99 | (0.92 to 1.06) | 18   |
| 25 Shiga     | 0.98    | (0.94 to 1.02) | 18   | 1.07 | (1.00 to 1.14) | 37   | 1.02 | (0.95 to 1.09) | 27   | 1.01 | (0.94 to 1.08) | 28   | 0.94 | (0.87 to 1.01) | 9    | 0.98 | (0.91 to 1.05) | 17   | 1.01 | (0.93 to 1.09) | 22   | 0.90 | (0.83 to 0.98) | 8    | 0.90 | (0.83 to 0.99) | 10   |
| 26 Kyoto     | 0.93    | (0.89 to 0.97) | 9    | 0.89 | (0.84 to 0.93) | 3    | 0.96 | (0.91 to 1.01) | 16   | 0.99 | (0.94 to 1.04) | 17   | 0.97 | (0.92 to 1.03) | 15   | 0.94 | (0.89 to 0.99) | 9    | 0.85 | (0.80 to 0.90) | 2    | 0.88 | (0.83 to 0.94) | 5    | 0.95 | (0.89 to 1.01) | 13   |
| 27 Osaka     | 0.95    | (0.91 to 0.98) | 10   | 0.92 | (0.89 to 0.95) | 6    | 0.96 | (0.92 to 0.99) | 14   | 0.98 | (0.95 to 1.02) | 16   | 1.00 | (0.97 to 1.04) | 22   | 0.98 | (0.95 to 1.02) | 18   | 0.94 | (0.91 to 0.98) | 10   | 0.91 | (0.87 to 0.95) | 9    | 0.85 | (0.81 to 0.89) | 5    |
| 28 Hyogo     | 0.92    | (0.89 to 0.96) | 8    | 0.94 | (0.90 to 0.97) | 8    | 0.96 | (0.92 to 1.00) | 13   | 0.98 | (0.94 to 1.02) | 15   | 0.97 | (0.93 to 1.01) | 14   | 0.93 | (0.89 to 0.96) | 4    | 0.89 | (0.85 to 0.93) | 7    | 0.84 | (0.80 to 0.88) | 4    | 0.86 | (0.81 to 0.90) | 6    |
| 29 Nara      | 0.87    | (0.83 to 0.90) | 2    | 0.97 | (0.91 to 1.04) | 12   | 0.95 | (0.89 to 1.02) | 12   | 0.95 | (0.88 to 1.01) | 8    | 0.91 | (0.85 to 0.97) | 4    | 0.89 | (0.83 to 0.95) | 2    | 0.80 | (0.75 to 0.86) | 1    | 0.76 | (0.71 to 0.82) | 1    | 0.75 | (0.69 to 0.82) | 1    |
| 30 Wakayama  | 1.01    | (0.96 to 1.05) | 21   | 1.03 | (0.97 to 1.09) | 27   | 1.02 | (0.95 to 1.08) | 29   | 1.00 | (0.94 to 1.07) | 24   | 1.04 | (0.98 to 1.12) | 37   | 0.98 | (0.91 to 1.05) | 16   | 0.95 | (0.87 to 1.02) | 11   | 0.93 | (0.86 to 1.02) | 12   | 1.08 | (0.99 to 1.18) | 37   |
| 31 Tottori   | 1.07    | (1.02 to 1.12) | 41   | 1.07 | (0.99 to 1.16) | 39   | 1.04 | (0.96 to 1.13) | 37   | 1.05 | (0.97 to 1.14) | 37   | 1.04 | (0.96 to 1.13) | 35   | 1.03 | (0.95 to 1.12) | 33   | 1.08 | (0.98 to 1.19) | 41   | 1.11 | (1.00 to 1.23) | 44   | 1.01 | (0.90 to 1.14) | 21   |
| 32 Shimane   | 1.05    | (1.01 to 1.10) | 36   | 1.05 | (0.98 to 1.13) | 33   | 1.09 | (1.01 to 1.17) | 42   | 1.06 | (0.98 to 1.14) | 39   | 0.98 | (0.91 to 1.06) | 17   | 1.03 | (0.95 to 1.11) | 30   | 1.13 | (1.03 to 1.23) | 44   | 1.05 | (0.95 to 1.15) | 27   | 0.96 | (0.86 to 1.07) | 14   |
| 33 Okayama   | 0.97    | (0.93 to 1.01) | 16   | 0.98 | (0.93 to 1.04) | 14   | 0.98 | (0.93 to 1.04) | 18   | 0.97 | (0.91 to 1.03) | 12   | 1.04 | (0.99 to 1.11) | 38   | 1.03 | (0.97 to 1.09) | 29   | 0.98 | (0.92 to 1.05) | 17   | 0.92 | (0.86 to 0.99) | 11   | 0.84 | (0.78 to 0.91) | 3    |
| 34 Hiroshima | 0.99    | (0.96 to 1.03) | 20   | 0.99 | (0.94 to 1.04) | 17   | 1.03 | (0.98 to 1.08) | 31   | 1.03 | (0.98 to 1.08) | 32   | 1.01 | (0.96 to 1.06) | 23   | 1.04 | (0.99 to 1.10) | 37   | 0.98 | (0.93 to 1.04) | 16   | 0.94 | (0.88 to 0.99) | 13   | 0.90 | (0.85 to 0.96) | 9    |
| 35 Yamaguchi | 1.03    | (0.99 to 1.07) | 27   | 0.99 | (0.94 to 1.05) | 19   | 1.04 | (0.98 to 1.10) | 36   | 1.01 | (0.95 to 1.07) | 25   | 1.03 | (0.97 to 1.09) | 30   | 1.01 | (0.96 to 1.08) | 24   | 1.04 | (0.98 to 1.12) | 30   | 1.07 | (1.00 to 1.15) | 36   | 1.05 | (0.97 to 1.13) | 32   |
| 36 Tokushima | 1.08    | (1.04 to 1.13) | 43   | 1.11 | (1.03 to 1.18) | 45   | 1.19 | (1.11 to 1.27) | 47   | 1.10 | (1.03 to 1.18) | 45   | 0.97 | (0.90 to 1.04) | 13   | 1.06 | (0.98 to 1.14) | 42   | 1.08 | (1.00 to 1.18) | 42   | 1.01 | (0.93 to 1.11) | 23   | 1.02 | (0.92 to 1.12) | 22   |
| 37 Kagawa    | 1.03    | (0.99 to 1.08) | 28   | 1.03 | (0.96 to 1.10) | 29   | 1.01 | (0.95 to 1.09) | 26   | 1.00 | (0.93 to 1.07) | 20   | 1.03 | (0.96 to 1.11) | 31   | 1.02 | (0.95 to 1.09) | 26   | 1.07 | (0.98 to 1.16) | 36   | 1.05 | (0.96 to 1.15) | 28   | 1.02 | (0.93 to 1.12) | 24   |
| 38 Ehime     | 1.06    | (1.02 to 1.10) | 37   | 1.02 | (0.96 to 1.08) | 24   | 1.13 | (1.07 to 1.19) | 44   | 1.02 | (0.96 to 1.08) | 30   | 1.03 | (0.97 to 1.09) | 28   | 1.08 | (1.02 to 1.15) | 44   | 1.03 | (0.96 to 1.11) | 28   | 1.07 | (0.99 to 1.15) | 34   | 1.07 | (0.99 to 1.16) | 35   |
| 39 Kochi     | 1.11    | (1.06 to 1.16) | 45   | 1.05 | (0.98 to 1.13) | 34   | 1.19 | (1.11 to 1.27) | 46   | 1.05 | (0.98 to 1.13) | 36   | 1.06 | (0.99 to 1.15) | 42   | 1.06 | (0.98 to 1.14) | 41   | 1.07 | (0.99 to 1.17) | 40   | 1.08 | (0.98 to 1.18) | 37   | 1.18 | (1.07 to 1.30) | 47   |
| 40 Fukuoka   | 0.97    | (0.94 to 1.01) | 17   | 0.96 | (0.92 to 1.00) | 11   | 0.93 | (0.89 to 0.97) | 7    | 0.97 | (0.93 to 1.01) | 11   | 1.04 | (1.00 to 1.08) | 34   | 0.99 | (0.95 to 1.03) | 20   | 0.98 | (0.93 to 1.02) | 15   | 0.97 | (0.92 to 1.02) | 17   | 0.94 | (0.89 to 0.99) | 12   |
| 41 Saga      | 1.08    | (1.04 to 1.13) | 42   | 1.03 | (0.96 to 1.10) | 28   | 1.09 | (1.01 to 1.17) | 41   | 1.09 | (1.01 to 1.17) | 43   | 0.99 | (0.92 to 1.07) | 20   | 1.10 | (1.03 to 1.19) | 47   | 1.13 | (1.04 to 1.23) | 45   | 1.11 | (1.02 to 1.22) | 45   | 1.   |                |      |

**Supplementary Table 8.** Variance and covariance matrices of prefecture-level variances of each occupation group, Japan, 1970-2005 <sup>a</sup>

|                                                | Men                                            |                                    |                                               |                                      |                                  |                                  | Women                                          |                                    |                                               |                                      |                                  |                                  |
|------------------------------------------------|------------------------------------------------|------------------------------------|-----------------------------------------------|--------------------------------------|----------------------------------|----------------------------------|------------------------------------------------|------------------------------------|-----------------------------------------------|--------------------------------------|----------------------------------|----------------------------------|
|                                                | Clerical, technical and managerial occupations | Sales and service occupations      | Agriculture, forestry and fishery occupations | Production and transport occupations | Unclassifiable occupations       | Non-employed <sup>b</sup>        | Clerical, technical and managerial occupations | Sales and service occupations      | Agriculture, forestry and fishery occupations | Production and transport occupations | Unclassifiable occupations       | Non-employed <sup>b</sup>        |
| Clerical, technical and managerial occupations | 0.005<br>(0.001)<br><i>1.000</i>               |                                    |                                               |                                      |                                  |                                  | 0.008<br>(0.002)<br><i>1.000</i>               |                                    |                                               |                                      |                                  |                                  |
| Sales and service occupations                  | 0.006<br>(0.002)<br><i>0.716</i>               | 0.014<br>(0.003)<br><i>1.000</i>   |                                               |                                      |                                  |                                  | 0.003<br>(0.002)<br><i>0.345</i>               | 0.010<br>(0.002)<br><i>1.000</i>   |                                               |                                      |                                  |                                  |
| Agriculture, forestry and fishery occupations  | 0.002<br>(0.001)<br><i>0.303</i>               | 0.005<br>(0.002)<br><i>0.506</i>   | 0.006<br>(0.001)<br><i>1.000</i>              |                                      |                                  |                                  | 0.002<br>(0.002)<br><i>0.176</i>               | 0.004<br>(0.002)<br><i>0.393</i>   | 0.013<br>(0.003)<br><i>1.000</i>              |                                      |                                  |                                  |
| Production and transport occupations           | 0.006<br>(0.002)<br><i>0.731</i>               | 0.012<br>(0.003)<br><i>0.920</i>   | 0.004<br>(0.002)<br><i>0.484</i>              | 0.013<br>(0.003)<br><i>1.000</i>     |                                  |                                  | 0.004<br>(0.002)<br><i>0.472</i>               | 0.006<br>(0.002)<br><i>0.544</i>   | 0.004<br>(0.002)<br><i>0.308</i>              | 0.011<br>(0.003)<br><i>1.000</i>     |                                  |                                  |
| Unclassifiable occupations                     | -0.007<br>(0.007)<br><i>-0.168</i>             | -0.003<br>(0.010)<br><i>-0.051</i> | 0.006<br>(0.007)<br><i>0.139</i>              | -0.005<br>(0.010)<br><i>-0.078</i>   | 0.317<br>(0.066)<br><i>1.000</i> |                                  | -0.022<br>(0.009)<br><i>-0.440</i>             | -0.014<br>(0.009)<br><i>-0.247</i> | -0.019<br>(0.011)<br><i>-0.297</i>            | -0.014<br>(0.010)<br><i>-0.244</i>   | 0.331<br>(0.070)<br><i>1.000</i> |                                  |
| Non-employed <sup>b</sup>                      | -0.001<br>(0.001)<br><i>-0.226</i>             | -0.003<br>(0.001)<br><i>-0.387</i> | -0.0002<br>(0.001)<br><i>-0.030</i>           | -0.003<br>(0.001)<br><i>-0.358</i>   | 0.006<br>(0.007)<br><i>0.144</i> | 0.006<br>(0.001)<br><i>1.000</i> | -0.002<br>(0.001)<br><i>-0.198</i>             | 0.005<br>(0.002)<br><i>0.508</i>   | -0.002<br>(0.002)<br><i>-0.203</i>            | -0.001<br>(0.002)<br><i>-0.112</i>   | 0.014<br>(0.008)<br><i>0.262</i> | 0.008<br>(0.002)<br><i>1.000</i> |

<sup>a</sup> The number in parentheses is a standard error of the corresponding variances and covariances. The italicized numbers are correlation coefficients.

<sup>b</sup> Non-employed is the sum of unemployed and non-labour force.

**Supplementary Table 9.** Gini's coefficient of yearly income, average yearly income, and average savings in 47 prefectures, Japan, 1969-2004<sup>a</sup>

| Prefectures        | 1969 <sup>b,c</sup> |        |         | 1974 <sup>c</sup> |        |         | 1979  |        |         | 1984  |        |         | 1989  |        |         | 1994  |        |         | 1999  |        |         | 2004  |        |         |
|--------------------|---------------------|--------|---------|-------------------|--------|---------|-------|--------|---------|-------|--------|---------|-------|--------|---------|-------|--------|---------|-------|--------|---------|-------|--------|---------|
|                    | Gini                | Income | Savings | Gini              | Income | Savings | Gini  | Income | Savings | Gini  | Income | Savings | Gini  | Income | Savings | Gini  | Income | Savings | Gini  | Income | Savings | Gini  | Income | Savings |
| 1 Hokkaido         | NA                  | 1,154  | 966     | NA                | 2,366  | 1,686   | 0.268 | 3,969  | 3,998   | 0.265 | 4,851  | 5,097   | 0.267 | 5,407  | 7,276   | 0.273 | 6,506  | 10,241  | 0.292 | 6,588  | 11,616  | 0.294 | 5,928  | 12,062  |
| 2 Aomori           | NA                  | 1,157  | 1,014   | NA                | 2,056  | 1,626   | 0.253 | 3,951  | 3,570   | 0.266 | 4,738  | 4,573   | 0.289 | 5,405  | 6,440   | 0.298 | 5,974  | 7,707   | 0.294 | 6,239  | 9,270   | 0.291 | 5,896  | 11,267  |
| 3 Iwate            | NA                  | 1,012  | 786     | NA                | 2,426  | 1,954   | 0.263 | 3,502  | 3,023   | 0.294 | 4,448  | 4,629   | 0.283 | 5,307  | 6,901   | 0.272 | 6,674  | 10,540  | 0.283 | 7,351  | 12,767  | 0.298 | 6,455  | 12,363  |
| 4 Miyagi           | NA                  | 1,105  | 1,021   | NA                | 2,788  | 2,301   | 0.251 | 4,223  | 4,470   | 0.260 | 5,158  | 4,947   | 0.271 | 6,307  | 8,006   | 0.279 | 7,486  | 10,666  | 0.275 | 7,167  | 12,261  | 0.307 | 6,764  | 11,894  |
| 5 Akita            | NA                  | 1,336  | 864     | NA                | 2,616  | 1,810   | 0.268 | 4,129  | 3,814   | 0.262 | 4,821  | 4,266   | 0.274 | 5,872  | 7,364   | 0.274 | 7,284  | 9,642   | 0.279 | 7,254  | 9,966   | 0.300 | 6,235  | 11,512  |
| 6 Yamagata         | NA                  | 1,053  | 877     | NA                | 2,341  | 1,803   | 0.256 | 4,151  | 3,761   | 0.266 | 5,088  | 4,688   | 0.272 | 6,748  | 7,695   | 0.273 | 8,045  | 10,705  | 0.277 | 7,926  | 13,045  | 0.306 | 7,070  | 12,675  |
| 7 Fukushima        | NA                  | 1,027  | 864     | NA                | 2,407  | 1,963   | 0.279 | 3,893  | 3,798   | 0.278 | 5,182  | 5,290   | 0.273 | 6,127  | 7,660   | 0.299 | 7,294  | 11,202  | 0.301 | 7,578  | 12,405  | 0.312 | 6,536  | 13,216  |
| 8 Ibaraki          | NA                  | 1,130  | 1,266   | NA                | 2,573  | 2,376   | 0.264 | 4,369  | 4,751   | 0.278 | 5,437  | 6,813   | 0.272 | 7,140  | 10,569  | 0.276 | 8,516  | 14,506  | 0.295 | 8,261  | 15,136  | 0.295 | 7,339  | 16,224  |
| 9 Tochigi          | NA                  | 1,291  | 1,306   | NA                | 2,617  | 2,577   | 0.276 | 4,461  | 4,981   | 0.262 | 5,819  | 6,365   | 0.262 | 6,884  | 11,496  | 0.296 | 8,146  | 16,105  | 0.290 | 7,630  | 15,077  | 0.310 | 7,527  | 15,793  |
| 10 Gunma           | NA                  | 1,203  | 1,135   | NA                | 2,586  | 2,361   | 0.251 | 4,216  | 4,627   | 0.267 | 5,475  | 6,571   | 0.289 | 6,312  | 9,731   | 0.287 | 8,001  | 15,031  | 0.302 | 7,415  | 16,836  | 0.293 | 6,704  | 15,878  |
| 11 Saitama         | NA                  | 1,347  | 1,322   | NA                | 2,758  | 2,462   | 0.244 | 4,473  | 4,314   | 0.253 | 5,803  | 6,431   | 0.268 | 7,322  | 11,731  | 0.274 | 8,565  | 13,811  | 0.281 | 7,994  | 14,871  | 0.295 | 7,165  | 14,919  |
| 12 Chiba           | NA                  | 1,355  | 1,319   | NA                | 2,765  | 2,511   | 0.254 | 4,593  | 5,108   | 0.266 | 5,898  | 7,036   | 0.272 | 7,439  | 11,391  | 0.283 | 8,683  | 13,165  | 0.294 | 8,330  | 16,243  | 0.302 | 7,230  | 16,646  |
| 13 Tokyo           | NA                  | 1,572  | 1,700   | NA                | 3,067  | 3,137   | 0.287 | 4,843  | 6,287   | 0.282 | 6,165  | 8,236   | 0.315 | 7,691  | 14,720  | 0.301 | 8,494  | 16,210  | 0.314 | 8,082  | 18,408  | 0.314 | 7,799  | 19,961  |
| 14 Kanagawa        | NA                  | 1,443  | 1,481   | NA                | 2,885  | 2,788   | 0.260 | 4,500  | 4,970   | 0.272 | 6,281  | 7,832   | 0.280 | 7,785  | 13,434  | 0.291 | 8,948  | 16,366  | 0.285 | 8,340  | 17,587  | 0.299 | 7,566  | 17,916  |
| 15 Niigata         | NA                  | 1,227  | 1,259   | NA                | 2,432  | 1,963   | 0.263 | 4,177  | 4,116   | 0.259 | 5,631  | 6,296   | 0.271 | 6,515  | 9,215   | 0.279 | 8,086  | 12,637  | 0.292 | 7,904  | 14,513  | 0.312 | 7,406  | 16,220  |
| 16 Toyama          | NA                  | 1,178  | 1,150   | NA                | 2,815  | 2,506   | 0.268 | 4,460  | 5,176   | 0.259 | 5,959  | 7,286   | 0.259 | 7,481  | 10,780  | 0.294 | 8,947  | 15,490  | 0.276 | 8,915  | 15,676  | 0.303 | 8,001  | 16,814  |
| 17 Ishikawa        | NA                  | 1,235  | 1,384   | NA                | 2,773  | 2,857   | 0.247 | 4,486  | 5,005   | 0.261 | 5,875  | 7,285   | 0.272 | 7,144  | 14,108  | 0.281 | 9,152  | 16,794  | 0.285 | 8,728  | 17,861  | 0.286 | 7,409  | 16,219  |
| 18 Fukui           | NA                  | 1,213  | 1,541   | NA                | 2,735  | 3,181   | 0.286 | 5,025  | 5,759   | 0.269 | 6,089  | 7,819   | 0.316 | 7,823  | 13,122  | 0.273 | 8,639  | 16,529  | 0.291 | 8,841  | 19,639  | 0.304 | 8,297  | 19,330  |
| 19 Yamanashi       | NA                  | 1,114  | 927     | NA                | 2,580  | 2,368   | 0.267 | 4,178  | 4,796   | 0.257 | 5,550  | 6,703   | 0.258 | 6,370  | 9,703   | 0.278 | 7,967  | 12,968  | 0.287 | 7,591  | 13,453  | 0.280 | 6,380  | 13,253  |
| 20 Nagano          | NA                  | 1,165  | 1,203   | NA                | 2,463  | 2,314   | 0.254 | 4,347  | 4,939   | 0.260 | 5,525  | 6,656   | 0.270 | 6,547  | 10,632  | 0.280 | 8,041  | 13,811  | 0.284 | 7,970  | 15,089  | 0.275 | 6,807  | 15,597  |
| 21 Gifu            | NA                  | 1,160  | 1,272   | NA                | 2,813  | 3,074   | 0.237 | 4,602  | 5,033   | 0.265 | 5,840  | 7,173   | 0.271 | 6,895  | 10,957  | 0.273 | 8,300  | 15,472  | 0.302 | 8,593  | 18,079  | 0.293 | 7,345  | 17,212  |
| 22 Shizuoka        | NA                  | 1,315  | 1,321   | NA                | 2,615  | 2,420   | 0.276 | 4,380  | 5,196   | 0.267 | 5,666  | 7,009   | 0.282 | 7,156  | 10,970  | 0.288 | 8,183  | 13,564  | 0.287 | 8,057  | 16,410  | 0.298 | 7,361  | 17,622  |
| 23 Aichi           | NA                  | 1,279  | 1,540   | NA                | 2,836  | 2,892   | 0.277 | 4,456  | 5,716   | 0.271 | 6,098  | 8,468   | 0.280 | 7,223  | 12,592  | 0.296 | 8,574  | 15,924  | 0.301 | 8,081  | 16,767  | 0.306 | 7,636  | 19,433  |
| 24 Mie             | NA                  | 1,269  | 1,597   | NA                | 2,736  | 3,058   | 0.247 | 4,137  | 5,033   | 0.251 | 5,541  | 6,694   | 0.283 | 7,161  | 11,692  | 0.289 | 8,224  | 15,492  | 0.286 | 8,159  | 15,888  | 0.287 | 7,346  | 19,677  |
| 25 Shiga           | NA                  | 1,286  | 1,497   | NA                | 2,930  | 3,361   | 0.232 | 4,753  | 5,470   | 0.262 | 6,027  | 7,817   | 0.266 | 7,407  | 12,852  | 0.266 | 8,745  | 15,929  | 0.286 | 7,994  | 16,220  | 0.280 | 7,231  | 17,098  |
| 26 Kyoto           | NA                  | 1,593  | 1,646   | NA                | 3,004  | 3,105   | 0.260 | 4,439  | 5,632   | 0.270 | 5,485  | 8,077   | 0.272 | 6,678  | 11,127  | 0.294 | 7,458  | 13,633  | 0.303 | 7,434  | 16,289  | 0.295 | 6,565  | 16,383  |
| 27 Osaka           | NA                  | 1,481  | 1,736   | NA                | 2,844  | 2,975   | 0.276 | 4,275  | 5,378   | 0.271 | 5,304  | 7,208   | 0.291 | 6,725  | 12,716  | 0.308 | 7,742  | 14,578  | 0.296 | 7,223  | 15,175  | 0.323 | 6,443  | 15,079  |
| 28 Hyogo           | NA                  | 1,367  | 1,779   | NA                | 2,746  | 2,827   | 0.272 | 4,384  | 5,839   | 0.281 | 5,771  | 7,835   | 0.293 | 6,709  | 13,310  | 0.287 | 7,955  | 15,221  | 0.296 | 7,552  | 15,221  | 0.314 | 6,887  | 16,826  |
| 29 Nara            | NA                  | 1,220  | 1,733   | NA                | 2,639  | 2,927   | 0.248 | 4,659  | 6,405   | 0.255 | 5,664  | 7,923   | 0.252 | 6,882  | 12,601  | 0.292 | 8,066  | 15,819  | 0.292 | 8,019  | 16,010  | 0.290 | 7,019  | 19,270  |
| 30 Wakayama        | NA                  | 1,180  | 1,693   | NA                | 2,574  | 3,311   | 0.255 | 4,038  | 5,210   | 0.303 | 5,511  | 8,111   | 0.303 | 5,916  | 10,795  | 0.309 | 7,009  | 12,886  | 0.295 | 6,959  | 14,747  | 0.304 | 6,209  | 16,929  |
| 31 Tottori         | NA                  | 1,112  | 1,134   | NA                | 2,574  | 2,223   | 0.259 | 4,100  | 4,752   | 0.278 | 5,208  | 6,922   | 0.276 | 6,599  | 9,898   | 0.289 | 7,698  | 13,798  | 0.296 | 7,400  | 14,908  | 0.297 | 6,875  | 16,442  |
| 32 Shimane         | NA                  | 999    | 777     | NA                | 2,343  | 1,890   | 0.269 | 4,021  | 4,191   | 0.284 | 5,444  | 5,958   | 0.271 | 6,032  | 9,969   | 0.292 | 7,395  | 12,366  | 0.322 | 7,707  | 13,343  | 0.298 | 6,789  | 15,128  |
| 33 Okayama         | NA                  | 1,164  | 1,330   | NA                | 2,594  | 2,696   | 0.267 | 4,478  | 5,659   | 0.280 | 5,329  | 7,799   | 0.292 | 6,162  | 11,342  | 0.282 | 7,206  | 14,636  | 0.291 | 7,756  | 16,356  | 0.303 | 6,493  | 17,909  |
| 34 Hiroshima       | NA                  | 1,187  | 1,326   | NA                | 2,641  | 2,444   | 0.264 | 4,136  | 4,935   | 0.276 | 5,351  | 6,620   | 0.275 | 6,225  | 10,185  | 0.286 | 7,659  | 13,471  | 0.311 | 7,240  | 15,763  | 0.301 | 6,778  | 15,478  |
| 35 Yamaguchi       | NA                  | 1,069  | 1,168   | NA                | 2,639  | 2,391   | 0.252 | 4,122  | 5,025   | 0.267 | 4,990  | 6,585   | 0.283 | 6,135  | 10,064  | 0.282 | 7,410  | 13,813  | 0.294 | 6,530  | 13,216  | 0.293 | 6,388  | 14,772  |
| 36 Tokushima       | NA                  | 1,101  | 1,292   | NA                | 2,330  | 2,156   | 0.298 | 4,128  | 5,444   | 0.287 | 5,384  | 6,979   | 0.284 | 6,065  | 9,934   | 0.294 | 7,235  | 13,253  | 0.321 | 7,361  | 15,291  | 0.345 | 6,607  | 16,186  |
| 37 Kagawa          | NA                  | 1,165  | 1,259   | NA                | 2,762  | 2,886   | 0.266 | 4,429  | 5,768   | 0.288 | 5,257  | 7,573   | 0.266 | 6,347  | 13,286  | 0.294 | 7,438  | 15,379  | 0.285 | 7,530  | 17,431  | 0.292 | 6,805  | 18,858  |
| 38 Ehime           | NA                  | 1,144  | 1,084   | NA                | 2,272  | 2,126   | 0.265 | 3,876  | 4,516   | 0.291 | 4,834  | 6,734   | 0.299 | 5,627  | 10,117  | 0.300 | 6,833  | 12,740  | 0.288 | 6,355  | 12,883  | 0.295 | 6,157  | 15,770  |
| 39 Kochi           | NA                  | 1,074  | 1,058   | NA                | 2,496  | 2,325   | 0.271 | 3,749  | 4,267   | 0.310 | 4,613  | 5,482   | 0.299 | 5,613  | 9,695   | 0.330 | 6,612  | 12,490  | 0.326 | 6,726  | 13,279  | 0.313 | 6,331  | 16,847  |
| 40 Fukuoka         | NA                  | 1,175  | 1,079   | NA                | 2,404  | 1,788   | 0.267 | 4,008  | 4,112   | 0.296 | 5,024  | 5,324   | 0.290 | 5,579  | 8,374   | 0.311 | 7,159  | 11,540  | 0.317 | 6,797  | 11,946  | 0.302 | 6,464  | 13,414  |
| 41 Saga            | NA                  | 1,073  | 1,064   | NA                | 2,293  | 2,065   | 0.261 | 3,799  | 3,610   | 0.286 | 4,923  | 5,248   | 0.301 | 6,147  | 8,612   | 0.296 | 7,159  | 11,607  | 0.284 | 7,440  | 12,538  | 0.296 | 6,832  | 13,363  |
| 42 Nagasaki        | NA                  | 1,113  | 942     | NA                | 2,184  | 1,473   | 0.249 | 3,659  | 3,511   | 0.287 | 4,273  | 5,116   | 0.259 | 5,249  | 6,941   | 0.289 | 6,129  | 8,777   | 0.301 | 6,646  | 10,999  | 0.309 | 5,855  | 11,355  |
| 43 Kumamoto        | NA                  | 1,116  | 804     | NA                | 2,233  | 1,750   | 0.276 | 3,713  | 3,716   | 0.286 | 4,791  | 5,155   | 0.308 | 5,721  | 7,603   | 0.313 | 6,874  | 10,354  | 0.310 | 6,640  | 10,824  | 0.316 | 6,388  | 11,657  |
| 44 Oita            | NA                  | 1,178  | 1,072   | NA                | 2,281  | 1,969   | 0.275 | 3,666  | 3,944   | 0.274 | 4,470  | 4,539   | 0.299 | 5,560  | 7,827   | 0.291 | 6,406  | 10,268  | 0.283 | 6,764  | 12,249  | 0.299 | 5,811  | 12,271  |
| 45 Miyazaki        | NA                  | 1,037  | 906     | NA                | 2,408  | 1,677   | 0.301 | 3,520  | 3,125   | 0.319 | 4,104  | 3,876   | 0.298 | 4,781  | 6,044   | 0.294 | 5,797  | 8,779   | 0.312 | 6,216  | 10,263  | 0.311 | 5,934  | 10,030  |
| 46 Kagoshima       | NA                  | 887    | 644     | NA                | 2,037  | 1,423   | 0.272 | 3,236  | 2,854   | 0.291 | 3,730  | 4,031   | 0.310 | 4,583  | 6,318   | 0.302 | 5,831  | 8,461   | 0.282 | 5,885  | 10,217  | 0.293 | 5,827  | 10,410  |
| 47 Okinawa         | NA                  | NA     | NA      | NA                | 2,128  | 990     | 0.299 | 3,261  | 2,345   | 0.337 | 3,648  | 2,656   | 0.332 | 4,505  | 4,728   | 0.380 | 5,491  | 5,238   | 0.353 | 5,298  | 5,918   | 0.344 | 4,516  | 5,484   |
| Mean               | NA                  | 1,197  | 1,220   | NA                | 2,562  | 2,357   | 0.265 | 4,170  | 4,637   | 0.276 | 5,278  | 6,355   | 0.282 | 6,368  | 10,054  | 0.291 | 7,575  | 12,971  | 0.296 | 7,457  | 14,261  | 0.302 | 6,753  | 15,120  |
| Standard deviation |                     |        |         |                   |        |         |       |        |         |       |        |         |       |        |         |       |        |         |       |        |         |       |        |         |

**Supplementary Table 10.** Odds ratios for all-cause premature mortality of prefecture-level socioeconomic status variables, Japan, 1970-2005 <sup>a</sup>

|                                                  | Overall |                | 1970 <sup>b</sup> |                | 1975 <sup>b</sup> |                | 1980 |                | 1985 |                | 1990 |                | 1995 |                | 2000 |                | 2005 |                |
|--------------------------------------------------|---------|----------------|-------------------|----------------|-------------------|----------------|------|----------------|------|----------------|------|----------------|------|----------------|------|----------------|------|----------------|
|                                                  | OR      | (95% CI)       | OR                | (95% CI)       | OR                | (95% CI)       | OR   | (95% CI)       | OR   | (95% CI)       | OR   | (95% CI)       | OR   | (95% CI)       | OR   | (95% CI)       | OR   | (95% CI)       |
| <i>Men</i>                                       |         |                |                   |                |                   |                |      |                |      |                |      |                |      |                |      |                |      |                |
| Gini's coefficient of yearly income <sup>c</sup> |         |                |                   |                |                   |                |      |                |      |                |      |                |      |                |      |                |      |                |
| Low                                              | 1.00    | Reference      | 1.00              | Reference      | 1.00              | Reference      | 1.00 | Reference      | 1.00 | Reference      | 1.00 | Reference      | 1.00 | Reference      | 1.00 | Reference      | 1.00 | Reference      |
| Middle                                           | 1.01    | (0.99 to 1.03) | 1.03              | (0.98 to 1.07) | 1.03              | (0.99 to 1.07) | 1.01 | (0.97 to 1.06) | 1.00 | (0.97 to 1.04) | 1.03 | (0.99 to 1.07) | 0.99 | (0.93 to 1.04) | 1.02 | (0.96 to 1.08) | 0.99 | (0.92 to 1.07) |
| High                                             | 1.01    | (0.98 to 1.03) | 1.03              | (0.99 to 1.07) | 1.01              | (0.97 to 1.05) | 0.99 | (0.95 to 1.04) | 0.98 | (0.94 to 1.01) | 0.99 | (0.95 to 1.03) | 1.00 | (0.94 to 1.06) | 0.98 | (0.93 to 1.05) | 0.98 | (0.91 to 1.06) |
| Average yearly income <sup>c</sup>               |         |                |                   |                |                   |                |      |                |      |                |      |                |      |                |      |                |      |                |
| High                                             | 1.00    | Reference      | 1.00              | Reference      | 1.00              | Reference      | 1.00 | Reference      | 1.00 | Reference      | 1.00 | Reference      | 1.00 | Reference      | 1.00 | Reference      | 1.00 | Reference      |
| Middle                                           | 0.99    | (0.97 to 1.02) | 0.99              | (0.95 to 1.03) | 1.04              | (1.00 to 1.08) | 1.05 | (1.00 to 1.09) | 0.99 | (0.95 to 1.03) | 1.00 | (0.96 to 1.04) | 1.05 | (0.99 to 1.11) | 1.07 | (1.01 to 1.13) | 0.99 | (0.91 to 1.07) |
| Low                                              | 0.99    | (0.96 to 1.02) | 1.04              | (1.00 to 1.08) | 1.05              | (1.01 to 1.08) | 1.04 | (0.99 to 1.09) | 0.98 | (0.94 to 1.02) | 0.96 | (0.92 to 1.00) | 1.01 | (0.96 to 1.07) | 1.04 | (0.98 to 1.10) | 1.03 | (0.96 to 1.11) |
| Average savings <sup>c</sup>                     |         |                |                   |                |                   |                |      |                |      |                |      |                |      |                |      |                |      |                |
| High                                             | 1.00    | Reference      | 1.00              | Reference      | 1.00              | Reference      | 1.00 | Reference      | 1.00 | Reference      | 1.00 | Reference      | 1.00 | Reference      | 1.00 | Reference      | 1.00 | Reference      |
| Middle                                           | 1.00    | (0.97 to 1.02) | 1.04              | (1.00 to 1.08) | 1.04              | (1.00 to 1.08) | 1.02 | (0.97 to 1.07) | 1.02 | (0.98 to 1.06) | 0.99 | (0.95 to 1.03) | 1.05 | (0.99 to 1.11) | 1.07 | (1.01 to 1.13) | 1.03 | (0.95 to 1.11) |
| Low                                              | 1.01    | (0.98 to 1.05) | 1.07              | (1.03 to 1.12) | 1.05              | (1.01 to 1.09) | 1.02 | (0.98 to 1.07) | 0.99 | (0.95 to 1.03) | 0.97 | (0.93 to 1.01) | 1.04 | (0.98 to 1.10) | 1.07 | (1.01 to 1.14) | 1.08 | (1.00 to 1.16) |
| <i>Women</i>                                     |         |                |                   |                |                   |                |      |                |      |                |      |                |      |                |      |                |      |                |
| Gini's coefficient of yearly income <sup>c</sup> |         |                |                   |                |                   |                |      |                |      |                |      |                |      |                |      |                |      |                |
| Low                                              | 1.00    | Reference      | 1.00              | Reference      | 1.00              | Reference      | 1.00 | Reference      | 1.00 | Reference      | 1.00 | Reference      | 1.00 | Reference      | 1.00 | Reference      | 1.00 | Reference      |
| Middle                                           | 1.00    | (0.97 to 1.02) | 0.98              | (0.93 to 1.05) | 1.01              | (0.95 to 1.08) | 1.00 | (0.95 to 1.05) | 1.04 | (0.99 to 1.09) | 1.02 | (0.97 to 1.07) | 0.97 | (0.90 to 1.03) | 0.96 | (0.89 to 1.03) | 0.99 | (0.91 to 1.07) |
| High                                             | 1.01    | (0.98 to 1.04) | 1.01              | (0.95 to 1.07) | 1.04              | (0.98 to 1.11) | 1.04 | (0.98 to 1.10) | 1.05 | (1.00 to 1.10) | 1.02 | (0.97 to 1.07) | 0.99 | (0.93 to 1.06) | 0.99 | (0.92 to 1.07) | 1.00 | (0.93 to 1.09) |
| Average yearly income <sup>c</sup>               |         |                |                   |                |                   |                |      |                |      |                |      |                |      |                |      |                |      |                |
| High                                             | 1.00    | Reference      | 1.00              | Reference      | 1.00              | Reference      | 1.00 | Reference      | 1.00 | Reference      | 1.00 | Reference      | 1.00 | Reference      | 1.00 | Reference      | 1.00 | Reference      |
| Middle                                           | 1.01    | (0.98 to 1.04) | 1.09              | (1.03 to 1.15) | 1.07              | (1.01 to 1.13) | 1.01 | (0.96 to 1.06) | 1.04 | (0.99 to 1.10) | 1.01 | (0.97 to 1.07) | 1.00 | (0.94 to 1.07) | 1.06 | (0.99 to 1.14) | 0.96 | (0.89 to 1.04) |
| Low                                              | 1.02    | (0.99 to 1.06) | 1.10              | (1.05 to 1.16) | 1.09              | (1.04 to 1.16) | 1.05 | (0.99 to 1.11) | 1.04 | (0.98 to 1.09) | 1.02 | (0.97 to 1.08) | 1.04 | (0.98 to 1.12) | 1.04 | (0.97 to 1.12) | 1.04 | (0.96 to 1.13) |
| Average savings <sup>c</sup>                     |         |                |                   |                |                   |                |      |                |      |                |      |                |      |                |      |                |      |                |
| High                                             | 1.00    | Reference      | 1.00              | Reference      | 1.00              | Reference      | 1.00 | Reference      | 1.00 | Reference      | 1.00 | Reference      | 1.00 | Reference      | 1.00 | Reference      | 1.00 | Reference      |
| Middle                                           | 1.00    | (0.97 to 1.03) | 1.09              | (1.03 to 1.15) | 1.05              | (0.99 to 1.12) | 1.01 | (0.96 to 1.07) | 1.02 | (0.96 to 1.07) | 1.08 | (1.03 to 1.13) | 1.03 | (0.96 to 1.10) | 1.05 | (0.98 to 1.13) | 1.01 | (0.93 to 1.09) |
| Low                                              | 1.02    | (0.98 to 1.06) | 1.08              | (1.02 to 1.14) | 1.04              | (0.98 to 1.11) | 1.02 | (0.96 to 1.07) | 1.01 | (0.96 to 1.07) | 1.03 | (0.98 to 1.07) | 1.06 | (0.99 to 1.13) | 1.08 | (1.00 to 1.16) | 1.05 | (0.97 to 1.14) |

CI; confidence interval, OR; odds ratio

<sup>a</sup> These odds ratios were adjusted for age (5 year categories) and occupations. We further adjusted for time-trends in the overall model. Prefecture-level variables were adjusted for separately.

<sup>b</sup> Gini's coefficients of yearly income were not available in these models, and we imputed the values of the 1980 model to them.

<sup>c</sup> These variables were calculated among two-or-more-person households.

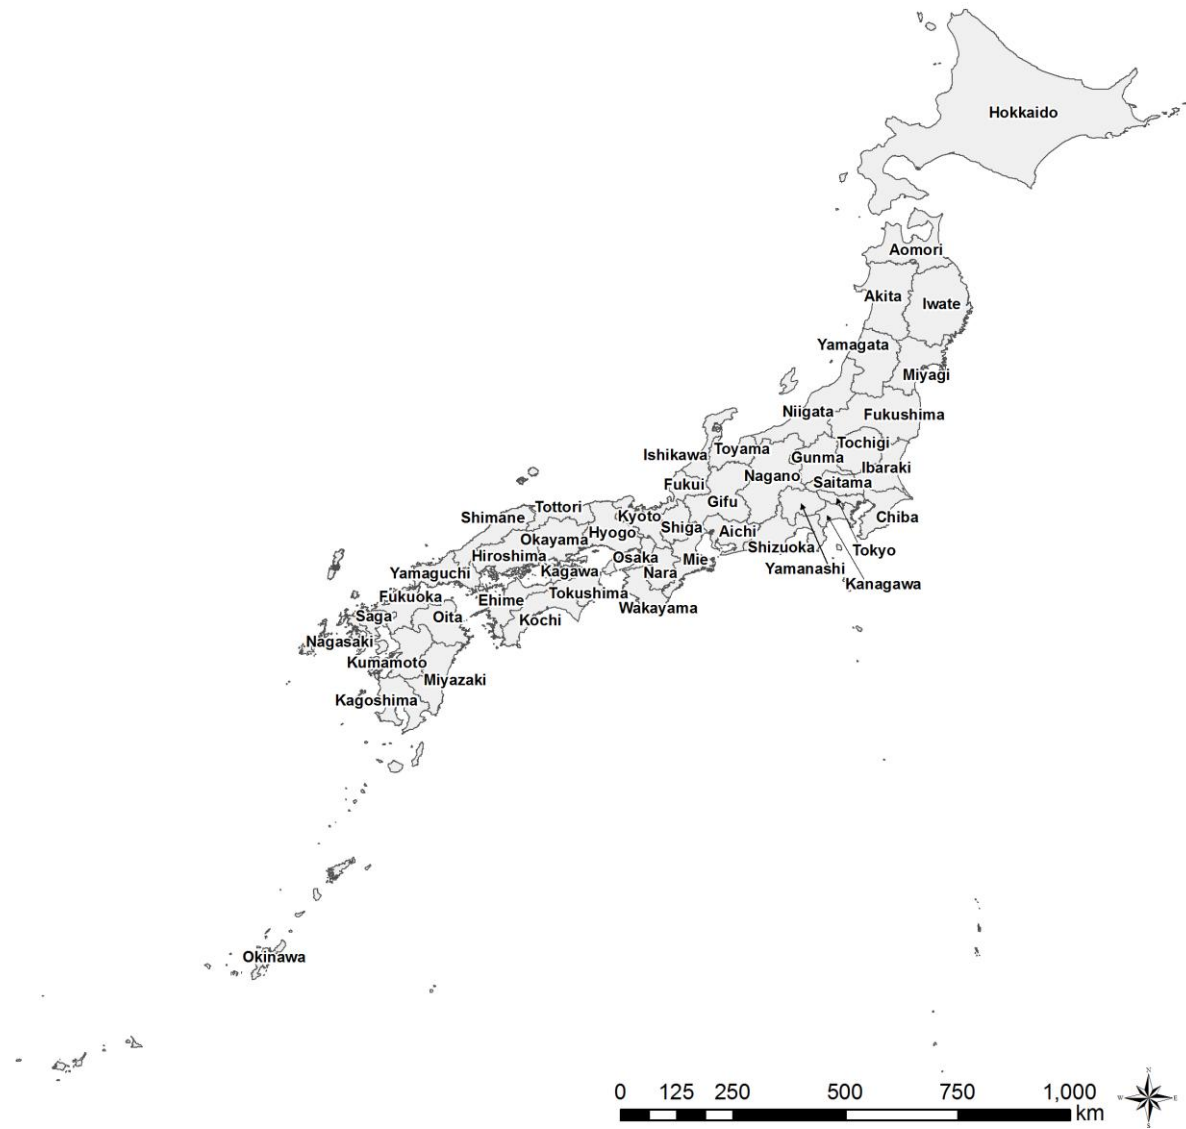

Supplementary Figure 1. A blank map of Japan.

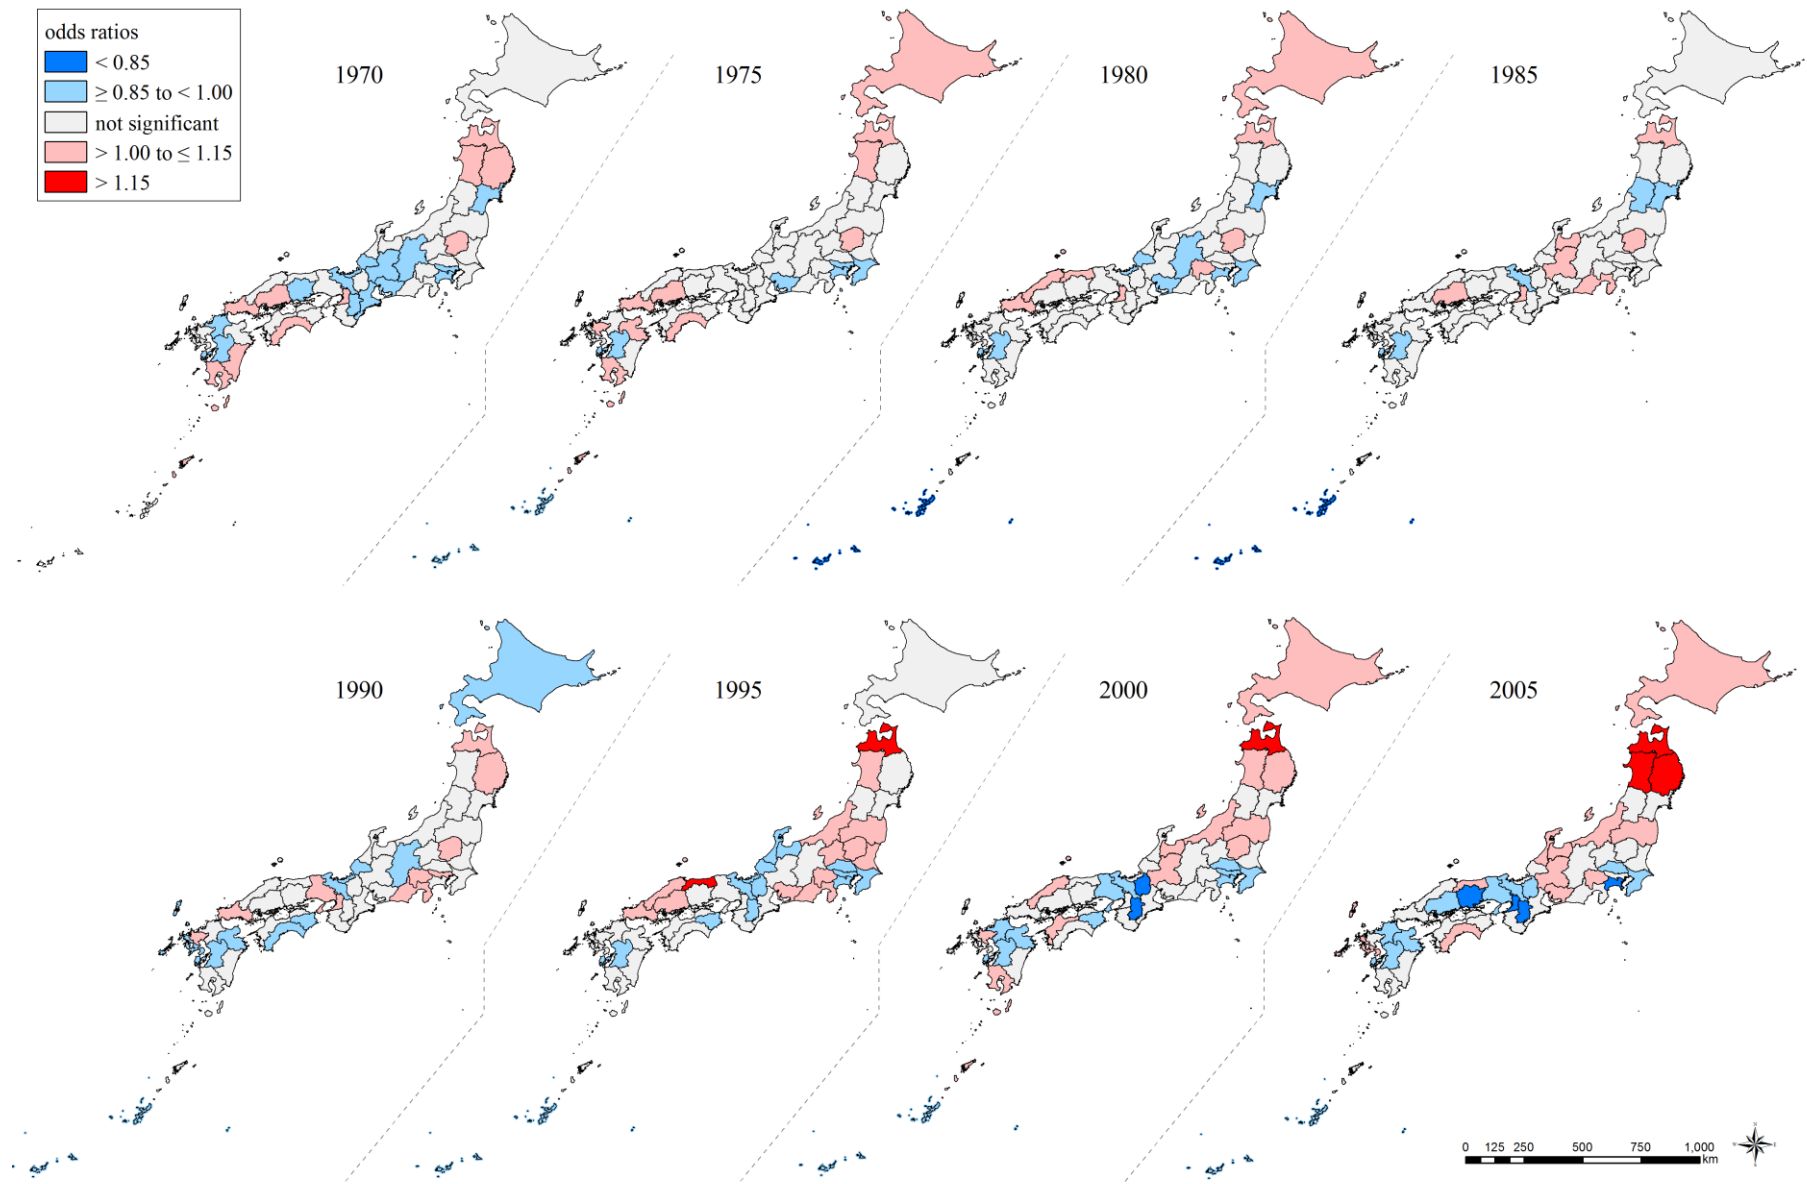

**Supplementary Figure 2.** Geographic and temporal variation in all-cause premature mortality among men, Japan.



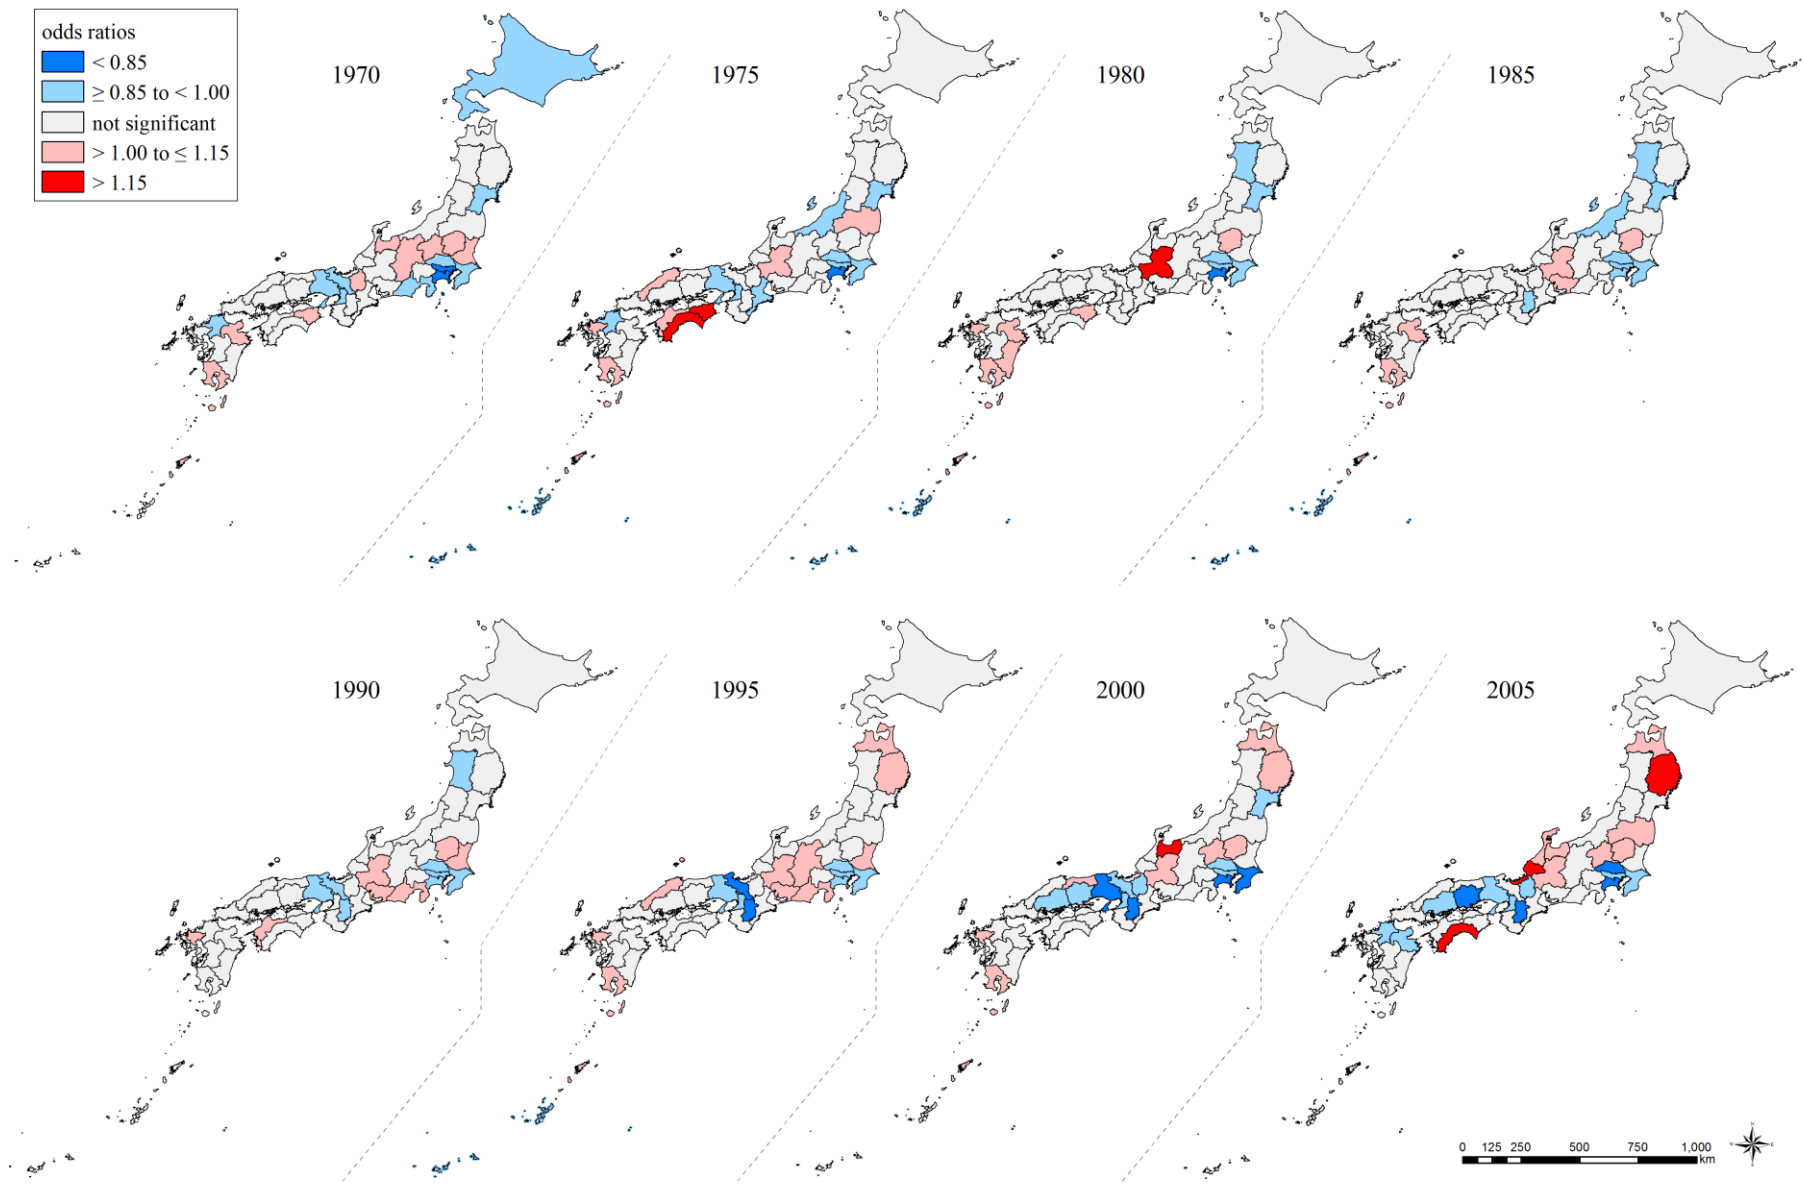

**Supplementary Figure 3.** Geographic and temporal variation in all-cause premature mortality among women, Japan.

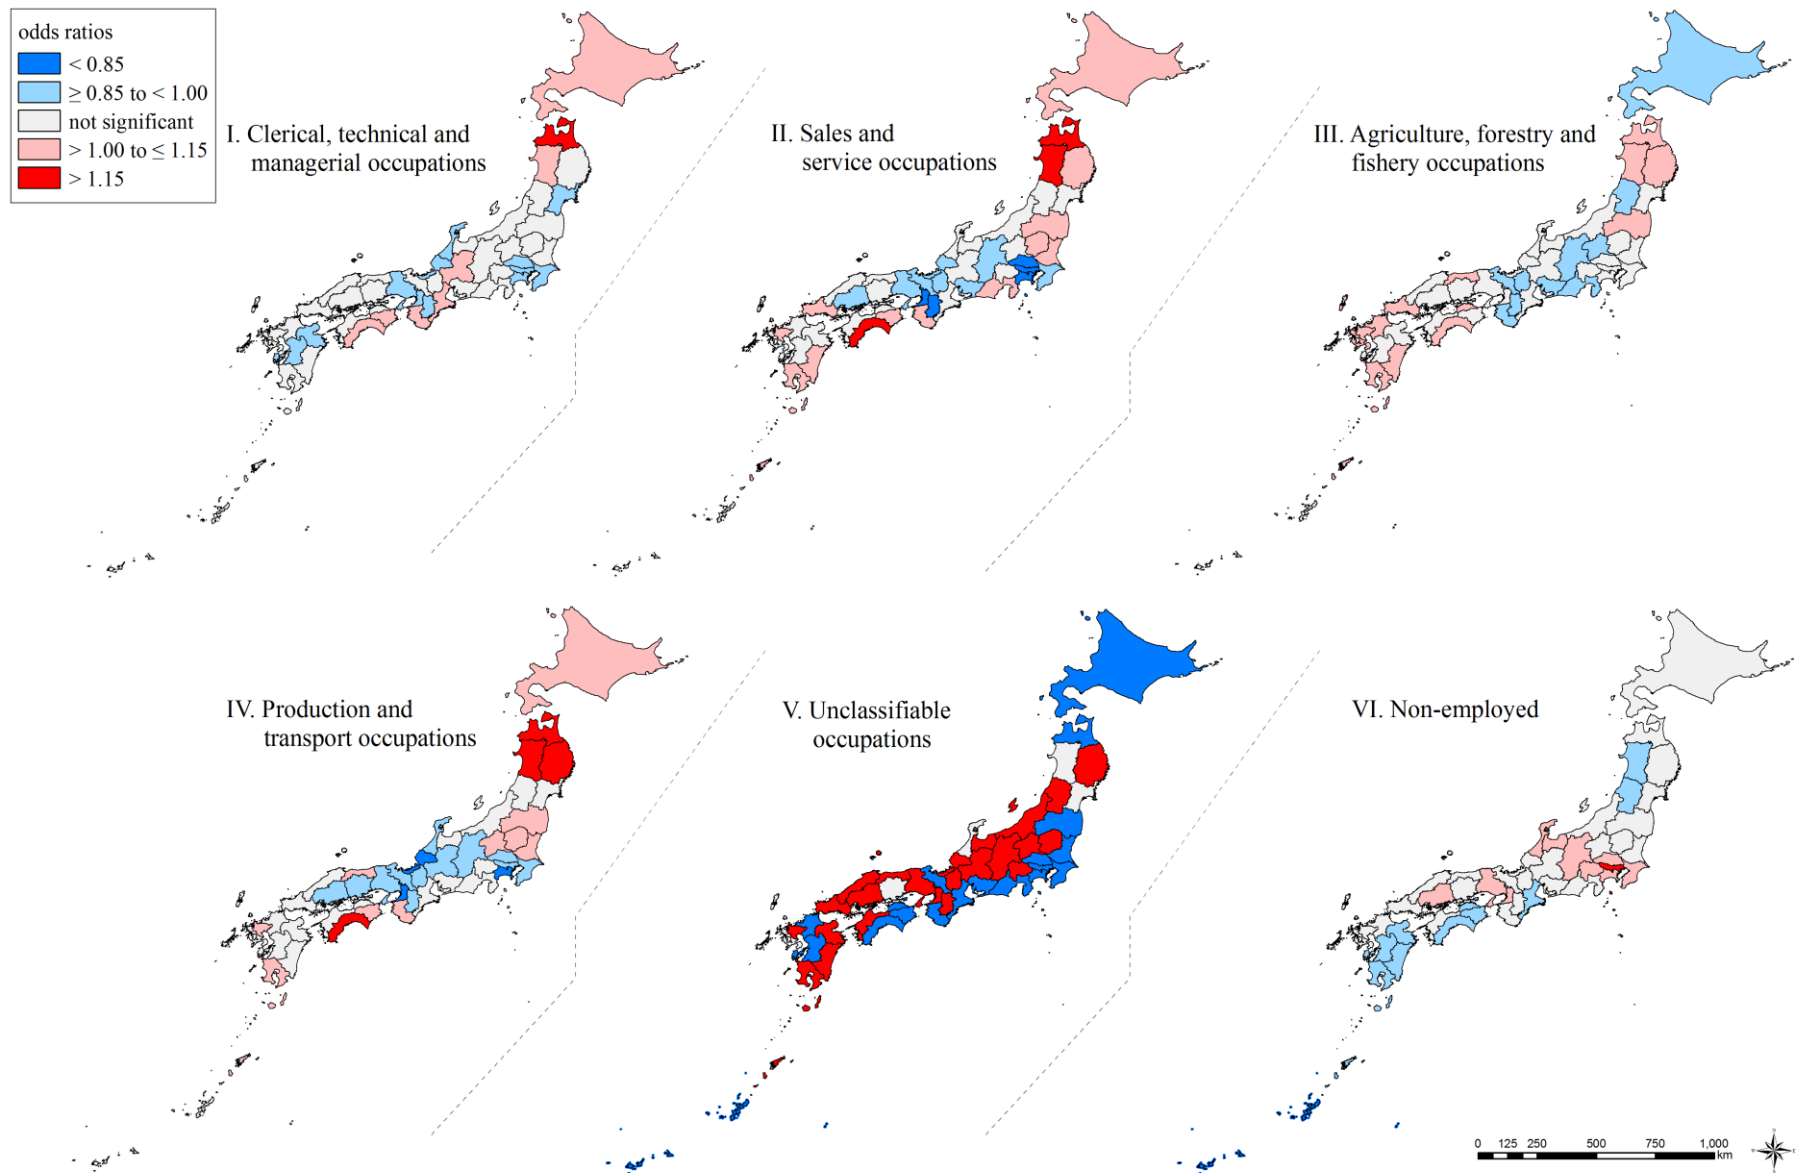

**Supplementary Figure 4.** Geographic inequality of all-cause premature mortality by occupational groups among men, Japan, 1970-2005.

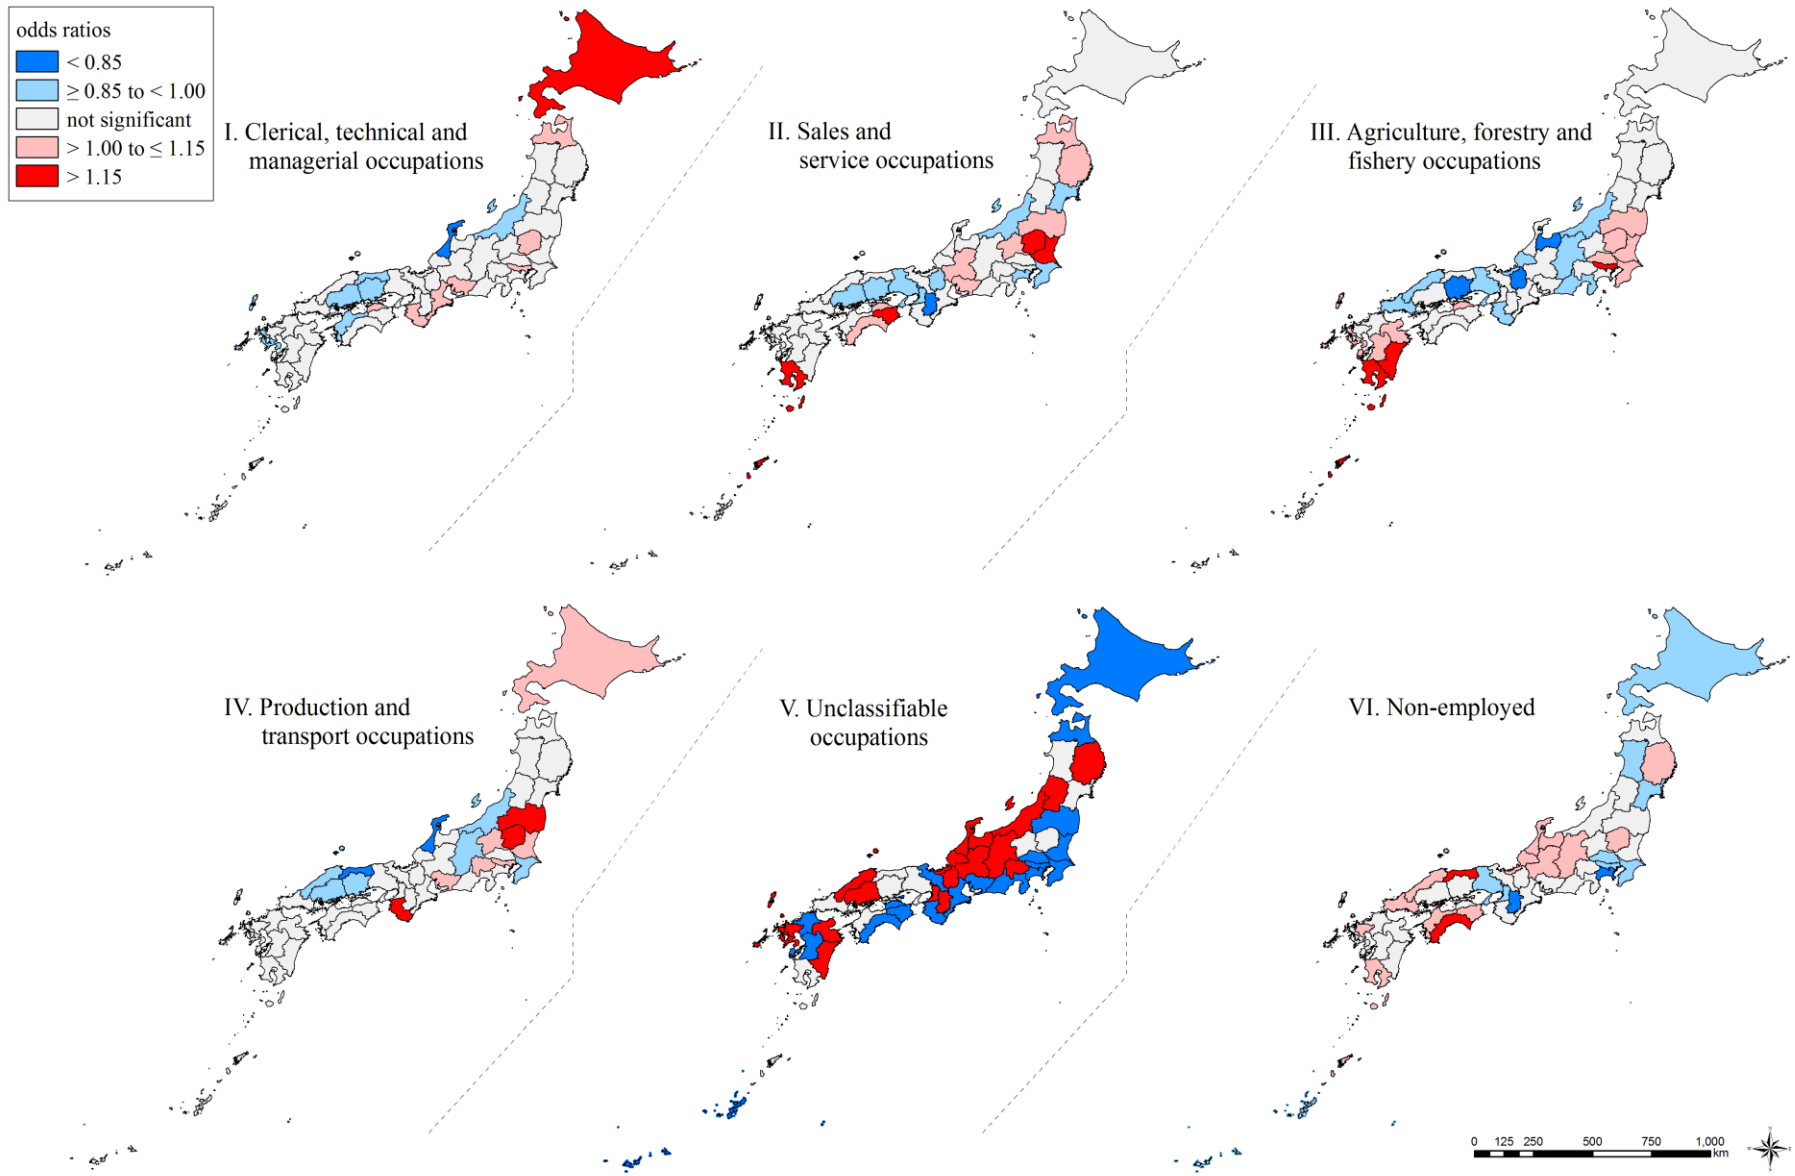

**Supplementary Figure 5.** Geographic inequality of all-cause premature mortality by occupational groups among women, Japan, 1970-2005.

## **Legends of Supplementary Figures**

**Supplementary Figure 1.** A blank map of Japan.

We show the locations of 47 prefectures in Japan.

**Supplementary Figure 2.** Geographic and temporal variation in all-cause premature mortality among men, Japan.

We show year-specific geographic inequality of all-cause mortality across 47 prefectures, conditional on individual age and occupation. (The data for Okinawa prefecture were not available in 1970.) Prefecture-level residuals are described in odds ratios with the reference being the grand mean of all the prefectures. Prefectures with a lower and a higher estimate of odds for mortality are filled with blue and red, respectively. Regarding areas filled with grey, prefecture-level residuals were not statistically significant.

**Supplementary Figure 3.** Geographic and temporal variation in all-cause premature mortality among women, Japan.

We show year-specific geographic inequality of all-cause mortality across 47 prefectures, conditional on individual age and occupation. (The data for Okinawa prefecture were not available in 1970.) Prefecture-level residuals are described in odds ratios with the reference being the grand mean of all the prefectures. Prefectures with a lower and a higher estimate of odds for mortality are filled with blue and red, respectively. Regarding areas filled with grey, prefecture-level residuals were not statistically significant.

**Supplementary Figure 4.** Geographic inequality of all-cause premature mortality by occupational groups among men, Japan, 1970-2005.

We show the geographic inequality of all-cause mortality across 47 prefectures for the six collapsed occupational groups, conditional on individual age, occupation, and year. Prefecture-level residuals are described in odds ratios with the reference being the grand mean of all the prefectures. Prefectures with a lower and a higher estimate of odds for mortality are filled with blue and red, respectively. Regarding areas filled with grey, prefecture-level residuals were not statistically significant.

**Supplementary Figure 5.** Geographic inequality of all-cause premature mortality by occupational groups among women, Japan, 1970-2005.

We show the geographic inequality of all-cause mortality across 47 prefectures for the six collapsed occupational groups, conditional on individual age, occupation, and year. Prefecture-level residuals are described in odds ratios with the reference being the grand mean of all the prefectures. Prefectures with a lower and a higher estimate of odds for mortality are filled with blue and red, respectively. Regarding areas filled with grey, prefecture-level residuals were not statistically significant.
