# Supplementary material for: Social and geographic inequalities in premature adult mortality in Japan: a multilevel observational study from 1970 to 2005
Source: PubMed Central journal article supplement — BMJ Open. 2012 Mar 2;2(2):e000425. doi: 10.1136/bmjopen-2011-000425 (PMC3293144; doi:10.1136/bmjopen-2011-000425), 2012-03-02
Supplement: bmjopen-2011-000425.draft_revisions.pdf [file bmjopen-2011-000425.draft_revisions.pdf]

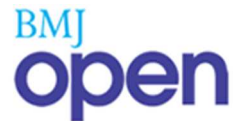

**Social and Geographic Inequalities in Premature Adult Mortality in Japan: Observational Study from 1970 to 2005**

|                                 |                                                                                                                                                                                                                                                                                                                                                                                                                                                                                                                                                                                                         |
|---------------------------------|---------------------------------------------------------------------------------------------------------------------------------------------------------------------------------------------------------------------------------------------------------------------------------------------------------------------------------------------------------------------------------------------------------------------------------------------------------------------------------------------------------------------------------------------------------------------------------------------------------|
| Journal:                        | <i>BMJ Open</i>                                                                                                                                                                                                                                                                                                                                                                                                                                                                                                                                                                                         |
| Manuscript ID:                  | bmjopen-2011-000425                                                                                                                                                                                                                                                                                                                                                                                                                                                                                                                                                                                     |
| Article Type:                   | Research                                                                                                                                                                                                                                                                                                                                                                                                                                                                                                                                                                                                |
| Date Submitted by the Author:   | 04-Oct-2011                                                                                                                                                                                                                                                                                                                                                                                                                                                                                                                                                                                             |
| Complete List of Authors:       | Suzuki, Etsuji; Okayama University Graduate School of Medicine, Dentistry and Pharmaceutical Sciences, Department of Epidemiology<br>Kashima, Saori; Hiroshima University Graduate School of Biomedical Sciences, Department of Public Health and Health Policy; Okayama University Graduate School of Medicine, Dentistry and Pharmaceutical Sciences, Department of Epidemiology<br>Kawachi, Ichiro; Harvard School of Public Health, Department of Society, Human Development, and Health<br>Subramanian, S V; Harvard School of Public Health, Department of Society, Human Development, and Health |
| <b>Primary Subject Heading</b>: | Epidemiology                                                                                                                                                                                                                                                                                                                                                                                                                                                                                                                                                                                            |
| Secondary Subject Heading:      | Public health                                                                                                                                                                                                                                                                                                                                                                                                                                                                                                                                                                                           |
| Keywords:                       | EPIDEMIOLGY, PUBLIC HEALTH, SOCIAL MEDICINE                                                                                                                                                                                                                                                                                                                                                                                                                                                                                                                                                             |
|                                 |                                                                                                                                                                                                                                                                                                                                                                                                                                                                                                                                                                                                         |

SCHOLARONE™  
Manuscripts

Only

1  
2  
3  
4  
5 1 **Social and Geographic Inequalities in Premature Adult Mortality in Japan:**  
6  
7  
8 2 **Observational Study from 1970 to 2005**  
9

10  
11 3 Etsuji Suzuki, Saori Kashima, Ichiro Kawachi, S V Subramanian  
12  
13  
14  
15 4

16  
17 5 Department of Epidemiology, Okayama University Graduate School of Medicine,  
18  
19 6 Dentistry and Pharmaceutical Sciences, 2-5-1 Shikata-cho, Kita-ku, Okayama  
20  
21 7 700-8558, Japan  
22  
23  
24  
25

26  
27 8 Etsuji Suzuki *assistant professor*, Saori Kashima  
28  
29

30 9 Department of Public Health and Health Policy, Hiroshima University Graduate  
31  
32 10 School of Biomedical Sciences, 1-2-3 Kasumi, Minami-ku, Hiroshima 734-8551,  
33  
34  
35  
36 11 Japan  
37  
38

39 12 Saori Kashima *assistant professor*  
40  
41

42 13 Department of Society, Human Development, and Health, Harvard School of Public  
43  
44 14 Health, 677 Huntington Avenue, Boston, MA 02115, USA  
45  
46  
47

48 15 Ichiro Kawachi *professor of social epidemiology and chair*, S V Subramanian  
49  
50 16 *professor of population health and geography*  
51  
52  
53

54 17 Correspondence to:  
55  
56

57  
58 18 E Suzuki etsuji-s@cc.okayama-u.ac.jp; S V Subramanian svsubram@hsph.harvard.edu  
59  
60

1  
2  
3  
4  
5 **Abstract**  
6  
7

8 **Objectives:** To examine trends in social and geographic inequalities in all-cause  
9  
10 premature adult mortality in Japan from 1970 through 2005.  
11  
12

13  
14 **Design:** Data were derived from the Vital Statistics and the Census. The participants  
15  
16 were entire population aged 25 or older and less than 65 in 1970, 1975, 1980, 1985,  
17  
18 1990, 1995, 2000, and 2005. The total number of decedents was 984,022 and 532,223  
19  
20  
21  
22  
23  
24 in men and women, respectively. For each sex, odds ratios (ORs) and 95% confidence  
25  
26  
27 intervals (CIs) for mortality were estimated by using multilevel logistic regression  
28  
29  
30 models with “cells” (cross-tabulated by age and occupation) at level 1, eight years at  
31  
32  
33 level 2, and 47 prefectures at level 3. The prefecture-level variance was used as an  
34  
35  
36 estimate of geographic inequalities of mortality.  
37  
38

39 **Results:** Adjusting for age and time-trends, compared with production process and  
40  
41 related workers, ORs ranged from 0.97 (95% CI 0.96 to 0.98) among administrative  
42  
43 and managerial workers to 2.22 (2.19 to 2.24) among service workers in men. By  
44  
45  
46 contrast, in women, the lowest odds for mortality was observed among production  
47  
48  
49 process and related workers (reference) while the highest OR was 12.22 (11.40 to  
50  
51  
52 13.10) among security workers. The degree of occupational inequality increased in  
53  
54  
55 both sexes. Higher occupational groups did not experience reductions in mortality  
56  
57  
58  
59  
60

1 throughout the period and was overtaken by lower occupational groups in the early  
2 1990s, among men. Conditional on individual age and occupation, overall geographic  
3 inequality of mortality were relatively small in both sexes; the ORs ranged from 0.87  
4 (Okinawa) to 1.13 (Aomori) for men and from 0.84 (Kanagawa) to 1.11 (Kagoshima)  
5 for women, even though there is a suggestion of increasing inequalities across  
6 prefectures since 1995 in both sexes.

7 **Conclusion:** The present findings demonstrate that both social and geographic  
8 inequalities in all-cause mortality have increased in Japan during the last three decades.

### 10 **Article summary**

#### 11 **Article focus:**

12 While Japan enjoys the highest average life expectancy in the world, less has been  
13 documented on the trends and patterns of health inequalities within the nation.

14 We examined trends in social and geographic inequalities in all-cause premature adult  
15 mortality from 1970 through 2005.

#### 16 **Key messages:**

17 This is the first study that simultaneously examines time trends in premature mortality  
18 by occupational class as well as geographic locality, and the results of our study

1  
2  
3  
4  
5 1 indicate that health disparities have widened during the decades following the collapse  
6  
7  
8 2 of the asset bubble in the early 1990s.  
9

10  
11 3 Given the multiple challenges that threaten to further dampen economic activity of the  
12  
13  
14 4 nation, it is imperative to continue to monitor future trends in health inequalities in  
15  
16  
17 5 order to avert the potential impacts on Japan's health security.  
18  
19

20  
21 6 **Strengths and limitations of this study:**  
22

23  
24 7 The data are census based and cover the whole of Japan from 1970 through 2005.  
25  
26

27 8 This study uses multilevel methods to properly adjust for micro- and macro-level bias  
28  
29  
30 9 simultaneously.  
31  
32

33 10 We lacked information on whether the individuals were in standard jobs or precarious  
34  
35  
36 11 jobs.  
37  
38  
39  
40  
41  
42  
43  
44  
45  
46  
47  
48  
49  
50  
51  
52  
53  
54  
55  
56  
57  
58  
59  
60

## 1 INTRODUCTION

2 The postwar Constitution (1946) of Japan made equality a primary objective of the  
3 health system, and by 1961, the country achieved universal and compulsory health  
4 insurance coverage.<sup>1</sup> Although Japanese longevity was well below that of most  
5 European countries in 1960, subsequent health gains enabled the country to overtake  
6 other nations to the point where Japan reached the top of the national life expectancy  
7 rankings by 1985.<sup>1 2</sup> During the period of rapid economic growth (mid-1960s to 1989),  
8 Japan's social and economic policies helped to create a broad middle class with secure  
9 (often life-long) employment and comparatively egalitarian growth in living standards  
10 across the income spectrum.<sup>1 3</sup> Following the collapse of the asset bubble in the early  
11 1990s, however, Japan's economy has been characterized by persistently low growth  
12 accompanied by a marked increase in the number of precarious workers (i.e.,  
13 non-standard jobs such as part-time and contingent workers), from 1 in 5 employees in  
14 the 1990s to 1 in 3 employees by 2005.<sup>4</sup> The period since the collapse of the asset  
15 bubble – now referred to as the “Lost Two Decades” – has been characterized by a  
16 widening of income disparities and the emergence of a new class of “working poor”  
17 hitherto unrecognized in Japanese society.<sup>5</sup> In retrospect, the post-War period of  
18 comparatively egalitarian economic growth appears to have lasted about forty years,

1 and today, Japan ranks closer to countries such as the United States and the UK in  
2 terms of indicators of relative poverty, such as poverty rate and poverty gap.<sup>6</sup>

3 While there are considerable studies documenting social and geographic  
4 inequalities in mortality in other industrialized countries,<sup>7-12</sup> we are not aware of a  
5 similar comprehensive assessment of the trends in health inequalities in Japan that may  
6 have accompanied the major macroeconomic changes.<sup>13</sup> In this study, by using  
7 occupations as an indicator of socioeconomic position,<sup>14</sup> we examine the trends in  
8 occupational and geographic inequalities of all-cause premature adult mortality from  
9 1970 through 2005. Since premature adult mortality focuses on death occurring at  
10 younger ages, they constitute a useful measure in public health as well as preventive  
11 medicine.<sup>15</sup>

## 12 13 **METHODS**

### 14 **Data**

15 Data on deaths were obtained from the “Report of Vital Statistics: Occupational and  
16 Industrial Aspects”,<sup>16</sup> which has been conducted by the Ministry of Health, Labour and  
17 Welfare every five years since 1970, coinciding with the years of the Population  
18 Census. The latest year for which data are available is 2005. In the notification of

1 deaths, the respondents are asked to fill in the occupation of decedent at the time of  
2 death,<sup>17</sup> and one of the following persons is obliged to submit the notification: (1)  
3 relatives who live together with decedents, (2) other housemates, (3) landlord, estate  
4 owner, land/house agent, or (4) relatives who do not live together with decedents. The  
5 occupation at the time of death is recorded for each decedent following the Japan  
6 Standard Occupational Classification.<sup>18</sup> During the follow-up period, the occupational  
7 classification scheme underwent four revisions (Supplementary Table 1).<sup>18</sup> In this study,  
8 we used the fourth revision of the Occupational Classification, which includes the  
9 following 11 groups<sup>18</sup>: (1) specialist and technical workers, (2) administrative and  
10 managerial workers, (3) clerical workers, (4) sales workers, (5) service workers, (6)  
11 security workers, (7) agriculture, forestry and fishery workers, (8) transport and  
12 communication workers, (9) production process and related workers, (10) workers not  
13 classifiable by occupation, and (11) non-employed. Note that the group “production  
14 process and related workers” includes mining workers. Note also that the group  
15 “non-employed” includes the unemployed as well as non-labor force (e.g.,  
16 home-makers, students, and the retired). Although the Census distinguishes the  
17 unemployed from home-makers, the vital records combine these categories as  
18 “non-employed”.<sup>18</sup> We restricted the analysis to those who are aged 25 or older and



1 less than 65 to exclude students as well as the retired. The total number of decedents  
2 was 984,022 and 532,223 in men and women, respectively (Supplementary Figure 1  
3 and Supplementary Table 2).

4 Denominator data for the calculation of mortality rates were obtained from the  
5 Population Census which has been conducted by Ministry of Internal Affairs and  
6 Communications every five years since 1920.<sup>19</sup> In the questionnaire for the Census, the  
7 occupation was assessed by asking a following question: “Description of work –  
8 Describe in detail the duties you are assigned to perform”.<sup>19</sup> The questionnaires are  
9 delivered to each household, and someone in each household answers the question. We  
10 used “production process and related workers” as the referent category since they were  
11 the largest occupational category in a majority of the time periods (Supplementary  
12 Table 3).

### 13 **Analysis**

14 The data had a three-level multilevel structure of 32,590 cells for men and 32,542 cells  
15 for women at level 1, nested within eight years at level 2, nested within 47 prefectures  
16 at level 3. The eight years comprised of 1970, 1975, 1980, 1985, 1990, 1995, 2000, and  
17 2005. Each year had a maximum 88 cells (eight age groups times 11 occupational  
18 groups) (Supplementary Table 4). Note that the numbers of deaths for each cell are

1 recorded during one fiscal year. For the descriptive purpose, we first calculated  
2 age-adjusted mortality rates by occupational class by year and sex (Supplementary  
3 Table 5). We used the direct method, using the model population of 1985 as a  
4 reference.<sup>20</sup> The model population of 1985 is based on the Japanese population under  
5 census of 1985 and it is created on the basis of 1,000 persons as 1 unit, after adjusting  
6 radical increase or decrease such as baby boom.<sup>21</sup> We then employed multilevel  
7 statistical procedures because of their ability to model complex variance structures at  
8 multiple levels.<sup>22</sup> In the present analysis, they allow estimation of the relationship  
9 between mortality and occupation, conditional on individual age variation (“fixed  
10 parameters”) and year- and prefecture-level variations (“random parameters”). They  
11 also enable an estimation of the extent to which the relationship between mortality and  
12 occupation varies across years and prefectures (random parameters) and the degree to  
13 which prefecture-level socioeconomic status explains this variation (fixed parameters).  
14 The unit of analysis was “cells”, and structurally, our models were identical to models  
15 with individuals at level 1.<sup>23</sup>

16 The response variable, proportion of deaths in each cell, was modeled with  
17 allowances made for the varying denominator in each cell. The fixed and random  
18 parameter estimates (along with their standard errors) for the multilevel binomial logit

1 link model were calibrated using predictive/penalized quasi-likelihood procedures with  
2 second order Taylor series expansion, as implemented within the MLwiN 2.22.<sup>24</sup>  
3 Results are presented as odds ratios (ORs) and 95% confidence intervals (CIs). A *p*  
4 value of less than 0.05 (two-sided test) was considered statistically significant.

5 First, we conducted three-level analysis as an overall model, with cells at level  
6 1, years at level 2, and prefectures at level 3. The prefecture-level variance was used as  
7 an estimate of geographic inequalities of mortality. Prefectures were ranked by ORs  
8 having the whole country of Japan as reference (value = 1), and uncertainty was  
9 estimated by 95% CIs. Further, to examine the temporal patterns of occupational and  
10 geographic inequality of mortality across years, we also conducted two-level analysis,  
11 with cells at level 1 and prefectures at level 2 separately for each year.

12 Then, to explore the temporal change of occupational inequality, we ran a  
13 three-level multilevel model including a fixed cross-level interaction effect between  
14 the 11 occupations (at level 1) and year (at level 2). In this analysis, we modeled the  
15 year as a continuous variable, and we calculated mean predicted probabilities for  
16 mortality among those aged 25 to 29 (referent category).

17 To present the results of geographic inequality in all-cause mortality, we  
18 created maps showing prefecture-level residuals by using the ArcGIS (ESRI Japan Inc.,

1 version 9.3).

2

### 3 **RESULTS**

#### 4 **Social inequality of mortality**

5 Table 1 shows the results of social inequality of all-cause mortality in terms of  
6 occupation from overall model as well as year-specific models. Excluding workers not  
7 classifiable by occupation and non-employed, there were substantial health disparities  
8 by occupations in both sexes. Adjusting for age and time-trends in the overall model,  
9 compared with production process and related workers, ORs ranged from 0.97 (95%  
10 CI 0.96 to 0.98) among administrative and managerial workers to 2.22 (95% CI 2.19 to  
11 2.24) among service workers in men. Among women, the lowest odds for mortality  
12 was observed among production process and related workers (reference) while the  
13 highest OR was 12.22 (95% CI 11.40 to 13.10) among security workers.

14 The degree of occupational inequality increased in both sexes. Among men, in  
15 1970, the lowest OR was 0.54 (95% CI 0.53 to 0.56) among administrative and  
16 managerial workers while the highest OR was 1.34 (95% CI 1.32 to 1.37) among  
17 agriculture, forestry and fishery workers. In 2005, however, the lowest odds for  
18 mortality was observed among production process and related workers (reference)

1 whereas the highest OR was 3.97 (95% CI 3.84 to 4.11) among service workers.

2 Among women, the lowest odds for mortality was observed among production process

3 and related workers (reference) throughout the follow-up period, and the highest ORs

4 in 1970 and 2005 were 11.43 (95% CI 9.14 to 14.29) and 16.25 (95% CI 13.65 to

5 19.34), respectively, among security workers.

6 Figures 1 and 2 show the temporal pattern of these occupational inequalities

7 across years. We excluded workers not classifiable by occupation and non-employed

8 from these Figures to enhance readability although they were included in the analysis.

9 Among men, the mortality risk among three occupations (specialist and technical

10 workers, administrative and managerial workers, and service workers) remained

11 unchanged, whereas those of other occupation groups declined more or less. Especially,

12 in addition to the workers not classifiable by occupation, three occupations (clerical

13 workers, sales workers, and product process and related workers) experienced a

14 considerable decline in mortality risk between 1970 and 2005.

15 By contrast, trends in mortality by occupational groups were more stable for

16 women. Most occupations experienced the comparable trajectories during the period

17 although administrative and managerial workers experienced relatively small declines

18 in mortality risk. Specialist and technical workers and service workers also

1 experienced declines in mortality risk among women although they remained on a  
2 plateau among men.

### 3 **Geographic inequality of mortality**

4 Conditional on individual age and occupation, overall geographic inequality of  
5 mortality were relatively small across prefectures in both sexes, with slightly larger  
6 geographic inequality among women than men (Table 2). Prefecture-specific ORs  
7 ranged from 0.87 (Okinawa prefecture) to 1.13 (Aomori prefecture) for men and from  
8 0.84 (Kanagawa prefecture) to 1.11 (Kagoshima prefecture) for women  
9 (Supplementary Tables 6 and 7). Figure 3 shows the results of geographic inequalities  
10 in mortality. We observed similar patterns in both sexes although they led to opposite  
11 results between the sexes in Akita and Fukui prefectures; in Akita, the mortality risk  
12 was higher in men whereas it was lower in women. In Fukui, however, the pattern was  
13 reversed.

14 Although overall geographic inequalities of mortality were relatively small,  
15 they appear to have increased over time (Table 2). In men, although prefecture-level  
16 variance was less pronounced until 1990 (around 0.003 on logit scale), it began to  
17 increase since 1995 steadily to 0.011 in 2005. By contrast, in women the  
18 prefecture-level variance (on logit scale) was 0.007 in 1970s, and it declined to 0.004

1 in 1990, and then increased up to 0.012 in 2005. The adjusted ORs and 95% CIs for  
2 mortality in each prefecture across years are shown in Supplementary Tables 6 and 7.  
3 In 1970, ORs ranged from 0.89 (Gifu prefecture) to 1.12 (Akita prefecture) for men  
4 and from 0.79 (Tokyo) to 1.14 (Kagoshima prefecture) for women. In 2005, the ranges  
5 were widened, and ORs ranged from 0.81 (Nara prefecture) to 1.27 (Aomori  
6 prefecture) for men and from 0.75 (Nara prefecture) to 1.18 (Kochi prefecture) for  
7 women. We show geographic and temporal variation in mortality, suggesting an  
8 increase in geographic inequalities across prefectures since 1995 in both sexes  
9 (Supplementary Figures 2 and 3 and Video).

## 10 **Supplementary analyses**

11 We examined two additional issues to further explore the occupational and  
12 geographic inequalities in premature mortality; (i) the patterns of geographic  
13 inequalities in mortality by occupations, and (ii) the presence of contextual effects of  
14 prefecture-level socioeconomic status on mortality risk (Supplementary Text,  
15 Supplementary Figures 4 and 5, Supplementary Tables 8 and 9).

## 17 **DISCUSSION**

### 18 **Summary of findings**

1  
2  
3  
4  
5  
6  
7  
8  
9  
10  
11  
12  
13  
14  
15  
16  
17  
18  
19  
20  
21  
22  
23  
24  
25  
26  
27  
28  
29  
30  
31  
32  
33  
34  
35  
36  
37  
38  
39  
40  
41  
42  
43  
44  
45  
46  
47  
48  
49  
50  
51  
52  
53  
54  
55  
56  
57  
58  
59  
60

1 The findings of the present study suggest that the economic trends during the past 35  
2 years have been accompanied by a widening of health inequalities between  
3 occupational classes as well as geographic areas of the country. The post-bubble  
4 economy has been characterized by lackluster growth combined with a dramatic shift  
5 in the work-force away from life-long employment towards more precarious  
6 employment.<sup>4</sup> This economic restructuring has increased pressure on workers in  
7 managerial and professional workers (primarily men) who are being squeezed to raise  
8 their productivity. The changing pattern of health inequalities across occupational  
9 groups is consistent with this interpretation, i.e., the stalled decline in premature  
10 mortality among white collar workers relative to other occupational classes.

### 11 **Comparison with other studies**

12 The present findings suggest that the health effects of the changing economic  
13 conditions depend on individual's socioeconomic circumstances. A previous study in  
14 Japan demonstrated that, although self-rated health improved for both sexes throughout  
15 the economic crisis of the 1990s, health disparities in relation to occupations widened,  
16 especially among men.<sup>25</sup> They also reported that middle-class male workers and female  
17 homemakers seemed to be particularly adversely affected by the crisis.<sup>25</sup> The present  
18 study, however, provides a different pattern of widening health disparities in both sexes.



1  
2  
3  
4  
5  
6 1 For men, absolute health status improvement was observed only among some lower  
7  
8  
9 2 occupational groups (e.g., production process and related workers, sales workers, and  
10  
11 3 clerical workers), whereas higher occupational classes (e.g., specialist and technical  
12  
13  
14 4 workers and administrative and managerial workers) apparently obtained no benefit  
15  
16  
17 5 throughout the period. Indeed, although they were advantaged with regard to mortality  
18  
19  
20 6 risk in 1970s and 1980s, they were overtaken in the 1990s by those in lower  
21  
22  
23 7 occupational classes who benefited more during the same period. Of note, this  
24  
25  
26 8 “cross-over” almost coincided with the collapse of the economic bubble in the early  
27  
28  
29 9 1990s. We note at the same time that neither male service workers nor agricultural,  
30  
31  
32 10 forestry and fishery workers experienced improvements in premature mortality  
33  
34  
35 11 throughout the period.

36  
37  
38  
39 12 By contrast, for women, we observe that absolute health status improved  
40  
41  
42 13 roughly to the same extent across occupational groups, and that changes in ranking  
43  
44  
45 14 were less pronounced in women compared to men. We should note that relatively few  
46  
47  
48 15 women were represented in the three occupational groups with higher risk of mortality  
49  
50  
51 16 (i.e., administrative and managerial workers, security workers, and transport and  
52  
53  
54 17 communication workers). Even excluding these occupational groups, however, health  
55  
56  
57 18 inequalities appeared to have increased in women. These findings may be explained by  
58  
59  
60

1 differences between men and women according to the type of work and industrial  
2 sector of employment. Men are more likely to be engaged in work in the private sector  
3 as well as in parts of the economy that are more vulnerable to economic downturns  
4 (such as finance and business services, manufacturing, construction).<sup>26</sup>

### 5 **Potential mechanisms of social inequalities in mortality**

6 The present findings provide a marked contrast to the evolution of health inequalities  
7 described in other industrialized countries. In industrialized western European and  
8 north American countries, health status typically follows a hierarchical pattern: i.e., the  
9 lower the socioeconomic position, the worse the health status.<sup>5 8 10 11</sup> We show that this  
10 “typical” pattern of health inequalities does not necessarily apply to Japan. In contrast  
11 to Western countries, previous studies in Japan have yielded inconsistent results with  
12 regard to the relationship between socioeconomic status and health outcomes, and  
13 lower non-manual or manual workers do not necessarily exhibit less healthy behaviors  
14 compared with those in higher occupational classes.<sup>27-32</sup> Nevertheless, a recent study of  
15 a nationally representative sample in 2001 showed that men in lower occupational  
16 classes, such as service work, transportation, and labor work, were significantly more  
17 likely to engage in health risk behaviors compared with professional workers.<sup>33</sup> They  
18 also showed that there is a cumulation of risky behaviors in lower female occupational

1 classes.<sup>33</sup> Further, another cross-sectional study in Japan demonstrated that occupation  
2 was not significantly associated with psychological distress among men or women by  
3 using a nationally representative sample in 2007.<sup>34</sup> Thus, the pattern of health  
4 inequalities in the present analysis is not consistent with occupational class differences  
5 in health behaviors or psychosocial stress.

### 6 **Geographic and temporal variation in mortality**

7 By applying the novel multilevel methods, the present study shows that geographic  
8 inequalities in premature mortality have also widened since 1995. In an ecological  
9 study, Fukuda et al.<sup>35</sup> assessed the time trend of geographic health inequality in Japan,  
10 by examining the association of life expectancy and age-adjusted mortality with per  
11 capita income of prefectures and municipalities. While excluding Okinawa prefecture  
12 from the analyses, they found a possible increase in geographic health inequalities  
13 from 1995 to 2000, following a decrease from 1955 to 1995.<sup>35</sup> Note that the present  
14 study examined geographic inequalities, conditional on individual age and occupation,  
15 providing suggestive evidence of “common ecologic effects” of place where people  
16 live.<sup>36</sup> Broadly speaking, since 1995, higher mortality risk has been consistently  
17 observed in the northeastern region in the main island (Tohoku region) for both sexes.  
18 Overall, the economic conditions of the predominantly rural areas in the region may be

1 characterized by population decline, population aging, and lower per capita income.<sup>19</sup>

2 <sup>37</sup> Notably, however, not all rural prefectures have undergone the same transition;

3 indeed some rural prefectures (such as Nara and Okayama) had moved up through the

4 ranks as having significantly lower mortality for both sexes in 2005. In the

5 supplementary analysis, no clear associations were found with prefecture-level

6 socioeconomic variables, and it remains unknown what contributed to these distinct

7 patterns. These patterns deserve further attention in future studies.

#### 8 **Limitations of the study**

9 There are some limitations of our analysis. First, although we were able to conduct a

10 fairly detailed analysis of trends by occupational class, neither the status in

11 employment nor the predominant type of employment contract was available, and in

12 particular, we lacked information on whether the individuals were in standard jobs or

13 precarious jobs. Given the conspicuous increase in the proportion of the labor force

14 engaged in non-standard work,<sup>4</sup> as well as mounting evidence that precarious work is

15 associated with worse health,<sup>38</sup> future work needs to examine whether the changing

16 character of the workforce in Japan is contributing to widening health inequalities.

17 Second, occupation at the time of death was used in our numerator data,

18 which may not necessarily reflect the individual's life-course socioeconomic

1 position.<sup>39 40</sup> If unhealthy workers selectively exited some occupations, this would have  
2 led to an under-estimation of mortality in those sectors. The proportion of agricultural  
3 workers significantly decreased during the study period for both sexes, as well as that  
4 of administrative and managerial workers (for men). However, this may reflect real  
5 trends in the work-force.

6 Third, considering the possible discrepancies of the respondents on the two  
7 occasions (i.e., the notification of deaths and the census), we should note the potential  
8 for numerator denominator bias between the two sources of information. In particular,  
9 the possibility of measurement error in occupation at the time of death cannot be ruled  
10 out – the person recording the notification of deaths may either promotes the deceased  
11 to a higher status job or demotes them because the respondents did not know the  
12 details of the deceased’s job.

13 Fourth, the smallest geographic unit available was the prefecture (of which  
14 there are 47), and we could not explore geographic inequalities in finer detail. However,  
15 the prefecture may be a useful and valid unit of analysis since it is the unit that has  
16 direct administrative authority in the economic, education, and health sectors.<sup>1</sup>  
17 Furthermore, the prefecture has specific jurisdiction over health centers, which is the  
18 locus of preventive health care activity in Japan.<sup>1</sup> Note also that the boundaries

1  
2  
3  
4  
5  
6  
7  
8  
9  
10  
11  
12  
13  
14  
15  
16  
17  
18  
19  
20  
21  
22  
23  
24  
25  
26  
27  
28  
29  
30  
31  
32  
33  
34  
35  
36  
37  
38  
39  
40  
41  
42  
43  
44  
45  
46  
47  
48  
49  
50  
51  
52  
53  
54  
55  
56  
57  
58  
59  
60

1 between prefectures have not changed since the Meiji Restoration (1867), enabling  
2 long-term analysis.<sup>1</sup> Since previous studies demonstrated that the choice of geographic  
3 units as well as area-based measures is critical in the investigation of geographic  
4 inequalities,<sup>41 42</sup> these issues warrant further examination.

## 5 **Conclusions**

6 The present findings demonstrate that both social and geographic inequalities in  
7 premature adult mortality have increased during Japan's "Lost Two Decades"  
8 following the collapse of the asset bubble. As a nation, Japan must grapple with the  
9 triple demographic trends of declining fertility, population aging, and overall  
10 population decline. These trends threaten to further dampen economic activity,  
11 escalating the load on the social security system. In addition, Japan now faces multiple  
12 challenges in the wake of the earthquake and tsunami on March 11, 2011, and this may  
13 further place downward momentum on the nation's struggling economy. Given these  
14 momentous challenges, it is imperative to continue to monitor future trends in health  
15 inequalities in order to avert the potential impacts on Japan's health security.

1  
2  
3  
4  
5  
6  
7  
8  
9  
10  
11  
12  
13  
14  
15  
16  
17  
18  
19  
20  
21  
22  
23  
24  
25  
26  
27  
28  
29  
30  
31  
32  
33  
34  
35  
36  
37  
38  
39  
40  
41  
42  
43  
44  
45  
46  
47  
48  
49  
50  
51  
52  
53  
54  
55  
56  
57  
58  
59  
60

## 1     **References**

- 2     1. Hasegawa T. Japan: Historical and current dimensions of health and health equity.  
3         In: Evans T, Whitehead M, Diderichsen F, Bhuiya A, Wirth M, editors.  
4         *Challenging Inequities in Health: From Ethics to Action*. New York, NY: Oxford  
5         University Press, 2001:90-103.
- 6     2. Marmot MG, Davey Smith G. Why are the Japanese living longer? *BMJ*  
7         1989;299:1547-51.
- 8     3. Bezruchka S, Namekata T, Siström MG. Interplay of politics and law to promote  
9         health: improving economic equality and health: the case of postwar Japan. *Am J*  
10         *Public Health* 2008;98:589-94.
- 11    4. Ministry of Internal Affairs and Communications. Labour Force Survey.  
12         <http://www.stat.go.jp/english/data/roudou/index.htm>.
- 13    5. Kagamimori S, Gaina A, Naser Moaddeli A. Socioeconomic status and health in the  
14         Japanese population. *Soc Sci Med* 2009;68:2152-60.
- 15    6. OECD. *OECD Factbook 2010: Economic, Environmental and Social Statistics*:  
16         OECD Publishing.
- 17    7. Friel S, Marmot MG. Action on the social determinants of health and health  
18         inequities goes global. *Annu Rev Public Health* 2011;32:225-36.

- 1  
2  
3  
4  
5 1 8. Braveman P, Egerter S, Williams DR. The social determinants of health: coming of  
6  
7  
8  
9 2 age. *Annu Rev Public Health* 2011;32:381-98.
- 10  
11 3 9. Thomas B, Dorling D, Davey Smith G. Inequalities in premature mortality in  
12  
13  
14 4 Britain: Observational study from 1921 to 2007. *BMJ* 2010;341:c3639.
- 15  
16  
17  
18 5 10. Mackenbach JP, Stirbu I, Roskam AJ, Schaap MM, Menvielle G, Leinsalu M, et al.  
19  
20  
21 6 Socioeconomic inequalities in health in 22 European countries. *N Engl J Med*  
22  
23  
24 7 2008;358:2468-81.
- 25  
26  
27 8 11. Krieger N, Rehkopf DH, Chen JT, Waterman PD, Marcelli E, Kennedy M. The fall  
28  
29  
30 9 and rise of US inequities in premature mortality: 1960-2002. *PLoS Med*  
31  
32  
33 10 2008;5:e46. doi:10.1371/journal.pmed.0050046.
- 34  
35  
36 11 12. Davey Smith G, Krieger N. Tackling health inequities. *BMJ* 2008;337:a1526.
- 37  
38  
39 12 13. Catalano R, Goldman-Mellor S, Saxton K, Margerison-Zilko C, Subbaraman M,  
40  
41  
42 13 Lewinn K, et al. The health effects of economic decline. *Annu Rev Public Health*  
43  
44  
45 14 2011;32:431-50.
- 46  
47  
48  
49 15 14. Galobardes B, Shaw M, Lawlor DA, Davey Smith G, Lynch J. Indicators of  
50  
51  
52 16 socioeconomic position. In: Oakes JM, Kaufman JS, editors. *Methods in Social*  
53  
54  
55 17 *Epidemiology*. San Francisco, CA: Jossey-Bass, 2006:47-85.
- 56  
57  
58 18 15. Rajaratnam JK, Marcus JR, Levin-Rector A, Chalupka AN, Wang H, Dwyer L, et  
59  
60



- 1  
2  
3  
4  
5  
6  
7  
8  
9  
10  
11  
12  
13  
14  
15  
16  
17  
18  
19  
20  
21  
22  
23  
24  
25  
26  
27  
28  
29  
30  
31  
32  
33  
34  
35  
36  
37  
38  
39  
40  
41  
42  
43  
44  
45  
46  
47  
48  
49  
50  
51  
52  
53  
54  
55  
56  
57  
58  
59  
60
- 1 al. Worldwide mortality in men and women aged 15-59 years from 1970 to 2010: a  
2 systematic analysis. *Lancet* 2010;375:1704-20.
- 3 16. Ministry of Health, Labour and Welfare. Overview Report of Vital Statistics in FY  
4 2005: Occupational and Industrial Aspects  
5 <http://www.mhlw.go.jp/english/database/db-hw/orvf/index.html>.
- 6 17. Ministry of Health, Labour and Welfare. Outline of Vital Statistics in Japan.  
7 <http://www.mhlw.go.jp/english/database/db-hw/outline/index.html>.
- 8 18. Ministry of Internal Affairs and Communications. Japan Standard Occupational  
9 Classification. <http://www.stat.go.jp/english/index/seido/shokgyou/index-co.htm>.
- 10 19. Ministry of Internal Affairs and Communications. Population Census.  
11 <http://www.stat.go.jp/english/data/kokusei/index.htm>.
- 12 20. Ministry of Health, Labour and Welfare. Vital Statistics.  
13 <http://www.mhlw.go.jp/toukei/list/81-1a.html> (in Japanese).
- 14 21. Ministry of Health, Labour and Welfare. Handbook of Health and Welfare Statistics  
15 2010. <http://www.mhlw.go.jp/english/database/db-hh/>.
- 16 22. Raudenbush SW, Bryk AS. *Hierarchical Linear Models: Applications and Data*  
17 *Analysis Methods*. 2nd ed. Thousand Oaks, CA: Sage Publications, 2002.
- 18 23. Subramanian SV, Duncan C, Jones K. Multilevel perspectives on modeling census

- 1  
2  
3  
4  
5  
6 1 data. *Environ Plann A* 2001;33:399-417.  
7  
8  
9 2 24. MLwiN Version 2.22 [program]: Centre for Multilevel Modelling, University of  
10  
11  
12 3 Bristol, 2010.  
13  
14  
15 4 25. Kondo N, Subramanian SV, Kawachi I, Takeda Y, Yamagata Z. Economic recession  
16  
17  
18 5 and health inequalities in Japan: analysis with a national sample, 1986-2001. *J*  
19  
20  
21 6 *Epidemiol Community Health* 2008;62:869-75.  
22  
23  
24 7 26. Riva M, Bambra C, Easton S, Curtis S. Hard times or good times? Inequalities in  
25  
26  
27 8 the health effects of economic change. *Int J Public Health* 2011;56:3-5.  
28  
29  
30 9 27. Kagamimori S, Kitagawa T, Nasermoaddeli A, Wang H, Kanayama H, Sekine M,  
31  
32  
33 10 et al. Differences in mortality rates due to major specific causes between Japanese  
34  
35  
36 11 male occupational groups over a recent 30-year period. *Ind Health*  
37  
38  
39 12 2004;42:328-35.  
40  
41  
42 13 28. Lahelma E, Lallukka T, Laaksonen M, Martikainen P, Rahkonen O, Chandola T, et  
43  
44  
45 14 al. Social class differences in health behaviours among employees from Britain,  
46  
47  
48 15 Finland and Japan: the influence of psychosocial factors. *Health Place*  
49  
50  
51 16 2010;16:61-70.  
52  
53  
54 17 29. Fukuda Y, Nakamura K, Takano T. Socioeconomic pattern of smoking in Japan:  
55  
56  
57 18 income inequality and gender and age differences. *Ann Epidemiol* 2005;15:365-72.  
58  
59  
60

- 1  
2  
3  
4  
5  
6  
7  
8  
9  
10  
11  
12  
13  
14  
15  
16  
17  
18  
19  
20  
21  
22  
23  
24  
25  
26  
27  
28  
29  
30  
31  
32  
33  
34  
35  
36  
37  
38  
39  
40  
41  
42  
43  
44  
45  
46  
47  
48  
49  
50  
51  
52  
53  
54  
55  
56  
57  
58  
59  
60
- 1 30. Nishi N, Makino K, Fukuda H, Tatara K. Effects of socioeconomic indicators on  
2 coronary risk factors, self-rated health and psychological well-being among urban  
3 Japanese civil servants. *Soc Sci Med* 2004;58:1159-70.
- 4 31. Takao S, Kawakami N, Ohtsu T. Occupational class and physical activity among  
5 Japanese employees. *Soc Sci Med* 2003;57:2281-9.
- 6 32. Martikainen P, Ishizaki M, Marmot MG, Nakagawa H, Kagamimori S.  
7 Socioeconomic differences in behavioural and biological risk factors: a comparison  
8 of a Japanese and an English cohort of employed men. *Int J Epidemiol*  
9 2001;30:833-8.
- 10 33. Fukuda Y, Nakamura K, Takano T. Accumulation of health risk behaviours is  
11 associated with lower socioeconomic status and women's urban residence: a  
12 multilevel analysis in Japan. *BMC Public Health* 2005;5:53.  
13 doi:10.1186/1471-2458-5-53.
- 14 34. Inoue A, Kawakami N, Tsuchiya M, Sakurai K, Hashimoto H. Association of  
15 occupation, employment contract, and company size with mental health in a  
16 national representative sample of employees in Japan. *J Occup Health*  
17 2010;52:227-40.
- 18 35. Fukuda Y, Nakao H, Yahata Y, Imai H. Are health inequalities increasing in Japan?

- 1  
2  
3  
4  
5  
6 1 The trends of 1955 to 2000. *Biosci Trends* 2007;1:38-42.  
7  
8  
9 2 36. Subramanian SV, Glymour MM, Kawachi I. Identifying causal ecologic effects on  
10  
11 3 health: A methodological assessment. In: Galea S, editor. *Macrosocial*  
12  
13 4 *Determinants of Population Health*. New York, NY: Springer, 2007:301-31.  
14  
15  
16  
17 5 37. Cabinet Office, Government of Japan. Prefectural Accounts.  
18  
19 6 [http://www.esri.cao.go.jp/jp/sna/sonota/kenmin/kenmin\\_top.html](http://www.esri.cao.go.jp/jp/sna/sonota/kenmin/kenmin_top.html) (in Japanese).  
20  
21  
22  
23 7 38. Kim MH, Kim CY, Park JK, Kawachi I. Is precarious employment damaging to  
24  
25 8 self-rated health? Results of propensity score matching methods, using longitudinal  
26  
27 9 data in South Korea. *Soc Sci Med* 2008;67:1982-94.  
28  
29  
30  
31  
32 10 39. Landsbergis PA. Assessing the contribution of working conditions to  
33  
34 11 socioeconomic disparities in health: a commentary. *Am J Ind Med* 2010;53:95-103.  
35  
36  
37  
38 12 40. Krieger N. Workers are people too: Societal aspects of occupational health  
39  
40 13 disparities - an ecosocial perspective. *Am J Ind Med* 2010;53:104-15.  
41  
42  
43  
44 14 41. Krieger N, Chen JT, Waterman PD, Soobader MJ, Subramanian SV, Carson R.  
45  
46 15 Geocoding and monitoring of US socioeconomic inequalities in mortality and  
47  
48 16 cancer incidence: does the choice of area-based measure and geographic level  
49  
50 17 matter?: the Public Health Disparities Geocoding Project. *Am J Epidemiol*  
51  
52 18 2002;156:471-82.  
53  
54  
55  
56  
57  
58  
59  
60

- 1  
2  
3  
4  
5 1 42. Reijneveld SA, Verheij RA, de Bakker DH. The impact of area deprivation on  
6  
7  
8 differences in health: does the choice of the geographical classification matter? *J*  
9  
10  
11 3 *Epidemiol Community Health* 2000;54:306-13.  
12  
13  
14  
15 4  
16  
17  
18 5  
19  
20  
21  
22  
23  
24  
25  
26  
27  
28  
29  
30  
31  
32  
33  
34  
35  
36  
37  
38  
39  
40  
41  
42  
43  
44  
45  
46  
47  
48  
49  
50  
51  
52  
53  
54  
55  
56  
57  
58  
59  
60

For peer review only

1  
2  
3  
4  
5  
6  
7  
8  
9  
10  
11  
12  
13  
14  
15  
16  
17  
18  
19  
20  
21  
22  
23  
24  
25  
26  
27  
28  
29  
30  
31  
32  
33  
34  
35  
36  
37  
38  
39  
40  
41  
42  
43  
44  
45  
46  
47  
48  
49  
50  
51  
52  
53  
54  
55  
56  
57  
58  
59  
60

1 **Acknowledgements:** The authors thank Akiko Tokinobu for her assistance with data  
2 collection.

3 **Contributors:** SVS and ES conceived the idea and design of the study. ES led the data  
4 collection, data analysis, interpretation of the findings, and writing of the paper. SVS  
5 supervised the study and contributed to the interpretation of findings and writing of the  
6 manuscript. SK contributed to the data analysis, literature review, and writing of the  
7 manuscript. IK contributed to the interpretation of the findings and writing of the  
8 manuscript. All authors have read and approved the final version of the manuscript.

9 **Funding:** A part of this research was supported by a Grant-in-Aid for Scientific  
10 Research, Ministry of Education, Culture, Sports, Science and Technology (MEXT),  
11 Japan. The funding source had no role in study design, data collection, data analysis,  
12 data interpretation, the writing of the report, or the decision to submit for publication.

13 **Competing interests:** All authors have completed the ICMJE uniform disclosure form  
14 at [www.icmje.org/coi\\_disclosure.pdf](http://www.icmje.org/coi_disclosure.pdf) (available on request from the corresponding  
15 author) and declare: SVS is supported by a Robert Wood Johnson Investigator Award  
16 in Health Policy Research and by a career development award from the National  
17 Institutes of Health (NHLBI K25 HL081275); no financial relationships with any  
18 organisations that might have an interest in the submitted work in the previous 3 years;

1 no other relationships or activities that could appear to have influenced the submitted  
2 work.

3 **Ethical approval:** Ethical approval was not required.

4 **Data sharing:** No additional data available.

5 **Licence for publication statement:** The Corresponding Author has the right to grant  
6 on behalf of all authors and does grant on behalf of all authors, an exclusive licence (or  
7 non-exclusive for government employees) on a worldwide basis to the BMJ Group and  
8 co-owners or contracting owning societies (where published by the BMJ Group on  
9 their behalf), and its Licensees to permit this article (if accepted) to be published in  
10 BMJ Open and any other BMJ Group products and to exploit all subsidiary rights, as  
11 set out in our licence.

1  
2  
3  
4  
5  
6  
7  
8  
9  
10  
11  
12  
13  
14  
15  
16  
17  
18  
19  
20  
21  
22  
23  
24  
25  
26  
27  
28  
29  
30  
31  
32  
33  
34  
35  
36  
37  
38  
39  
40  
41  
42  
43  
44  
45  
46  
47  
48  
49  
50  
51  
52  
53  
54  
55  
56  
57  
58  
59  
60

1 **Figure legends**

2 **Figure 1. Predicted mortality by occupations in men, Japan, 1970-2005.**

3 We show mean predicted probabilities for all-cause mortality by nine occupational  
4 groups among those aged 25 to 29 (referent category). We excluded workers not  
5 classifiable by occupation and non-employed.

7 **Figure 2. Predicted mortality by occupations in women, Japan, 1970-2005.**

8 We show mean predicted probabilities for all-cause mortality by nine occupational  
9 groups among those aged 25 to 29 (referent category). We excluded workers not  
10 classifiable by occupation and non-employed.

12 **Figure 3. Geographic inequality of all-cause mortality, Japan, 1970-2005.**

13 We show the overall geographic inequality of all-cause mortality across 47 prefectures,  
14 conditional on individual age, occupation, and year. Prefecture-level residuals are  
15 described in odds ratios with the reference being the grand mean of all the prefectures.  
16 Prefectures with a lower and a higher estimate of odds for mortality are filled with blue  
17 and red, respectively. Regarding areas filled with gray, prefecture-level residuals were  
18 not statistically significant.



1 Table 1. Odds ratios for all-cause mortality in each occupation, Japan, 1970-2005<sup>a</sup>

|                                           | Overall |                  | 1970  |                  | 1975  |                  | 1980   |                    |
|-------------------------------------------|---------|------------------|-------|------------------|-------|------------------|--------|--------------------|
|                                           | OR      | (95% CI)         | OR    | (95% CI)         | OR    | (95% CI)         | OR     | (95% CI)           |
| <i>Men</i>                                |         |                  |       |                  |       |                  |        |                    |
| Specialist and technical workers          | 1.31    | (1.30 to 1.33)   | 0.74  | (0.72 to 0.77)   | 0.80  | (0.77 to 0.82)   | 1.18   | (1.14 to 1.21)     |
| Administrative and managerial workers     | 0.97    | (0.96 to 0.98)   | 0.54  | (0.53 to 0.56)   | 0.66  | (0.64 to 0.68)   | 0.76   | (0.74 to 0.78)     |
| Clerical workers                          | 1.20    | (1.19 to 1.21)   | 1.05  | (1.03 to 1.08)   | 1.09  | (1.06 to 1.12)   | 1.18   | (1.15 to 1.21)     |
| Sales workers                             | 1.26    | (1.25 to 1.27)   | 1.25  | (1.23 to 1.28)   | 1.26  | (1.24 to 1.29)   | 1.38   | (1.35 to 1.41)     |
| Service workers                           | 2.22    | (2.19 to 2.24)   | 1.22  | (1.18 to 1.27)   | 1.20  | (1.16 to 1.25)   | 1.93   | (1.86 to 1.99)     |
| Security workers                          | 1.05    | (1.03 to 1.08)   | 0.67  | (0.63 to 0.72)   | 0.76  | (0.72 to 0.81)   | 0.94   | (0.88 to 1.00)     |
| Agriculture, forestry and fishery workers | 1.89    | (1.87 to 1.91)   | 1.34  | (1.32 to 1.37)   | 1.48  | (1.45 to 1.51)   | 1.74   | (1.71 to 1.78)     |
| Transport and communication workers       | 1.29    | (1.28 to 1.31)   | 1.06  | (1.02 to 1.09)   | 0.98  | (0.95 to 1.02)   | 1.17   | (1.13 to 1.21)     |
| Production process and related workers    | 1.00    | Reference        | 1.00  | Reference        | 1.00  | Reference        | 1.00   | Reference          |
| Workers not classifiable by occupation    | 29.61   | (29.28 to 29.94) | 41.44 | (37.93 to 45.28) | 59.25 | (56.07 to 62.61) | 115.11 | (110.66 to 119.75) |
| Non-employed                              | 7.78    | (7.73 to 7.82)   | 5.83  | (5.73 to 5.93)   | 6.18  | (6.07 to 6.28)   | 6.68   | (6.56 to 6.80)     |
| <i>Women</i>                              |         |                  |       |                  |       |                  |        |                    |
| Specialist and technical workers          | 1.85    | (1.81 to 1.89)   | 1.64  | (1.54 to 1.74)   | 1.54  | (1.44 to 1.63)   | 1.88   | (1.77 to 2.00)     |
| Administrative and managerial workers     | 4.91    | (4.76 to 5.06)   | 3.57  | (3.26 to 3.91)   | 3.54  | (3.23 to 3.87)   | 3.17   | (2.88 to 3.50)     |
| Clerical workers                          | 1.23    | (1.20 to 1.25)   | 1.63  | (1.55 to 1.72)   | 1.35  | (1.28 to 1.42)   | 1.45   | (1.38 to 1.53)     |
| Sales workers                             | 1.80    | (1.77 to 1.83)   | 1.35  | (1.29 to 1.41)   | 1.45  | (1.38 to 1.52)   | 1.87   | (1.78 to 1.97)     |
| Service workers                           | 1.65    | (1.62 to 1.68)   | 1.11  | (1.06 to 1.17)   | 1.04  | (0.99 to 1.10)   | 1.77   | (1.68 to 1.86)     |
| Security workers                          | 12.22   | (11.40 to 13.10) | 11.43 | (9.14 to 14.29)  | 9.24  | (7.30 to 11.69)  | 11.57  | (9.07 to 14.76)    |
| Agriculture, forestry and fishery workers | 2.25    | (2.22 to 2.29)   | 1.65  | (1.60 to 1.71)   | 1.88  | (1.80 to 1.95)   | 2.18   | (2.09 to 2.28)     |
| Transport and communication workers       | 6.88    | (6.59 to 7.18)   | 4.01  | (3.53 to 4.55)   | 3.89  | (3.42 to 4.43)   | 7.07   | (6.31 to 7.91)     |
| Production process and related workers    | 1.00    | Reference        | 1.00  | Reference        | 1.00  | Reference        | 1.00   | Reference          |
| Workers not classifiable by occupation    | 42.07   | (41.22 to 42.93) | 41.07 | (35.48 to 47.54) | 14.58 | (13.19 to 16.12) | 110.06 | (103.28 to 117.29) |
| Non-employed                              | 4.81    | (4.75 to 4.88)   | 3.39  | (3.29 to 3.50)   | 3.45  | (3.34 to 3.56)   | 4.48   | (4.32 to 4.65)     |

2 CI; confidence interval, OR; odds ratio

3 <sup>a</sup> We adjusted for age (five year categories) and year in the overall model. We adjusted for only age (five year categories) in other models.

1 Table 1. Odds ratios for all-cause mortality in each occupation, Japan, 1970-2005 (cont.)

| 1985  |                  | 1990  |                  | 1995  |                  | 2000  |                  | 2005  |                  |
|-------|------------------|-------|------------------|-------|------------------|-------|------------------|-------|------------------|
| OR    | (95% CI)         |
| 1.14  | (1.10 to 1.17)   | 1.25  | (1.21 to 1.28)   | 1.35  | (1.32 to 1.39)   | 2.83  | (2.75 to 2.90)   | 2.50  | (2.43 to 2.57)   |
| 1.01  | (0.98 to 1.04)   | 1.04  | (1.01 to 1.07)   | 1.08  | (1.05 to 1.11)   | 2.26  | (2.19 to 2.34)   | 2.50  | (2.41 to 2.60)   |
| 1.25  | (1.22 to 1.28)   | 1.40  | (1.37 to 1.44)   | 1.34  | (1.31 to 1.38)   | 1.42  | (1.37 to 1.46)   | 1.07  | (1.03 to 1.11)   |
| 1.38  | (1.35 to 1.41)   | 1.26  | (1.23 to 1.29)   | 1.15  | (1.12 to 1.18)   | 1.37  | (1.33 to 1.41)   | 1.27  | (1.23 to 1.31)   |
| 1.97  | (1.91 to 2.04)   | 2.64  | (2.56 to 2.72)   | 2.90  | (2.81 to 2.99)   | 3.93  | (3.81 to 4.06)   | 3.97  | (3.84 to 4.11)   |
| 1.05  | (0.99 to 1.11)   | 1.28  | (1.21 to 1.36)   | 1.21  | (1.15 to 1.29)   | 1.53  | (1.45 to 1.62)   | 1.77  | (1.68 to 1.87)   |
| 1.97  | (1.92 to 2.01)   | 2.21  | (2.16 to 2.27)   | 2.37  | (2.30 to 2.44)   | 3.32  | (3.21 to 3.43)   | 3.12  | (3.00 to 3.24)   |
| 1.20  | (1.17 to 1.24)   | 1.33  | (1.29 to 1.37)   | 1.43  | (1.39 to 1.48)   | 1.88  | (1.82 to 1.94)   | 1.92  | (1.85 to 2.00)   |
| 1.00  | Reference        |
| 49.01 | (47.39 to 50.69) | 34.66 | (33.64 to 35.72) | 54.18 | (52.82 to 55.58) | 52.73 | (51.40 to 54.08) | 9.13  | (8.80 to 9.48)   |
| 6.94  | (6.82 to 7.06)   | 8.15  | (8.01 to 8.30)   | 8.59  | (8.44 to 8.74)   | 11.16 | (10.93 to 11.39) | 14.21 | (13.90 to 14.52) |
| 1.82  | (1.71 to 1.93)   | 1.85  | (1.74 to 1.96)   | 2.02  | (1.89 to 2.15)   | 2.83  | (2.65 to 3.01)   | 2.63  | (2.45 to 2.82)   |
| 3.68  | (3.37 to 4.02)   | 5.16  | (4.77 to 5.58)   | 6.08  | (5.60 to 6.61)   | 10.16 | (9.31 to 11.09)  | 12.21 | (11.07 to 13.47) |
| 1.26  | (1.20 to 1.33)   | 1.17  | (1.11 to 1.23)   | 1.32  | (1.25 to 1.40)   | 1.31  | (1.23 to 1.39)   | 1.26  | (1.17 to 1.35)   |
| 2.03  | (1.93 to 2.13)   | 1.89  | (1.80 to 1.98)   | 1.94  | (1.83 to 2.05)   | 2.20  | (2.06 to 2.34)   | 2.32  | (2.16 to 2.50)   |
| 1.67  | (1.58 to 1.76)   | 1.86  | (1.77 to 1.95)   | 2.21  | (2.09 to 2.33)   | 2.42  | (2.28 to 2.57)   | 2.49  | (2.33 to 2.67)   |
| 19.51 | (16.24 to 23.43) | 17.07 | (14.34 to 20.33) | 13.22 | (10.88 to 16.05) | 12.49 | (10.34 to 15.09) | 16.25 | (13.65 to 19.34) |
| 2.08  | (1.98 to 2.18)   | 2.10  | (2.00 to 2.20)   | 2.63  | (2.47 to 2.79)   | 3.15  | (2.93 to 3.39)   | 3.42  | (3.14 to 3.73)   |
| 7.52  | (6.73 to 8.40)   | 9.54  | (8.59 to 10.61)  | 8.17  | (7.20 to 9.28)   | 9.65  | (8.45 to 11.01)  | 11.54 | (10.06 to 13.24) |
| 1.00  | Reference        |
| 48.48 | (45.76 to 51.37) | 51.39 | (48.69 to 54.24) | 90.68 | (86.15 to 95.46) | 80.79 | (76.53 to 85.29) | 14.45 | (13.33 to 15.67) |
| 4.38  | (4.23 to 4.54)   | 4.46  | (4.30 to 4.62)   | 6.29  | (6.04 to 6.55)   | 7.91  | (7.55 to 8.29)   | 9.62  | (9.10 to 10.16)  |

2

1 Table 2. Adjusted prefecture-level variance for all-cause mortality, Japan, 1970-2005 <sup>a</sup>

|                   | Men                       |                  |                          | Women                     |                  |                          |
|-------------------|---------------------------|------------------|--------------------------|---------------------------|------------------|--------------------------|
|                   | Variance (on logit scale) |                  |                          | Variance (on logit scale) |                  |                          |
|                   | Estimate                  | (95% CI)         | Range of OR <sup>b</sup> | Estimate                  | (95% CI)         | Range of OR <sup>b</sup> |
| Overall           | 0.003                     | (0.001 to 0.004) | 0.87 to 1.13             | 0.005                     | (0.003 to 0.007) | 0.84 to 1.11             |
| 1970 <sup>c</sup> | 0.003                     | (0.002 to 0.005) | 0.89 to 1.12             | 0.007                     | (0.004 to 0.010) | 0.79 to 1.14             |
| 1975              | 0.003                     | (0.001 to 0.004) | 0.88 to 1.09             | 0.007                     | (0.004 to 0.010) | 0.82 to 1.19             |
| 1980              | 0.004                     | (0.002 to 0.005) | 0.82 to 1.11             | 0.005                     | (0.003 to 0.008) | 0.85 to 1.15             |
| 1985              | 0.003                     | (0.001 to 0.004) | 0.85 to 1.09             | 0.005                     | (0.002 to 0.007) | 0.86 to 1.13             |
| 1990              | 0.003                     | (0.002 to 0.004) | 0.89 to 1.11             | 0.004                     | (0.002 to 0.006) | 0.88 to 1.10             |
| 1995              | 0.006                     | (0.003 to 0.009) | 0.85 to 1.22             | 0.008                     | (0.004 to 0.012) | 0.80 to 1.15             |
| 2000              | 0.007                     | (0.004 to 0.010) | 0.84 to 1.25             | 0.010                     | (0.005 to 0.015) | 0.76 to 1.15             |
| 2005              | 0.011                     | (0.007 to 0.016) | 0.81 to 1.27             | 0.012                     | (0.007 to 0.017) | 0.75 to 1.18             |

2 CI; confidence interval, OR; odds ratio

3 <sup>a</sup> We adjusted for age (five year categories) and occupations. We further adjusted for year in the overall model.4 <sup>b</sup> The range of adjusted odds ratios for mortality in each prefecture is shown. The reference is the grand mean of all the prefectures.5 <sup>c</sup> The variance between 46 prefectures is shown because the data for Okinawa prefecture were not available in 1970.

1  
2  
3  
4  
5  
6  
7  
8  
9  
10  
11  
12  
13  
14  
15  
16  
17  
18  
19  
20  
21  
22  
23  
24  
25  
26  
27  
28  
29  
30  
31  
32  
33  
34  
35  
36  
37  
38  
39  
40  
41  
42  
43  
44  
45  
46  
47  
48  
49  
50  
51  
52  
53  
54  
55  
56  
57  
58  
59  
60

Figure 1. Predicted Mortality by Occupations in Men, Japan, 1970-2005

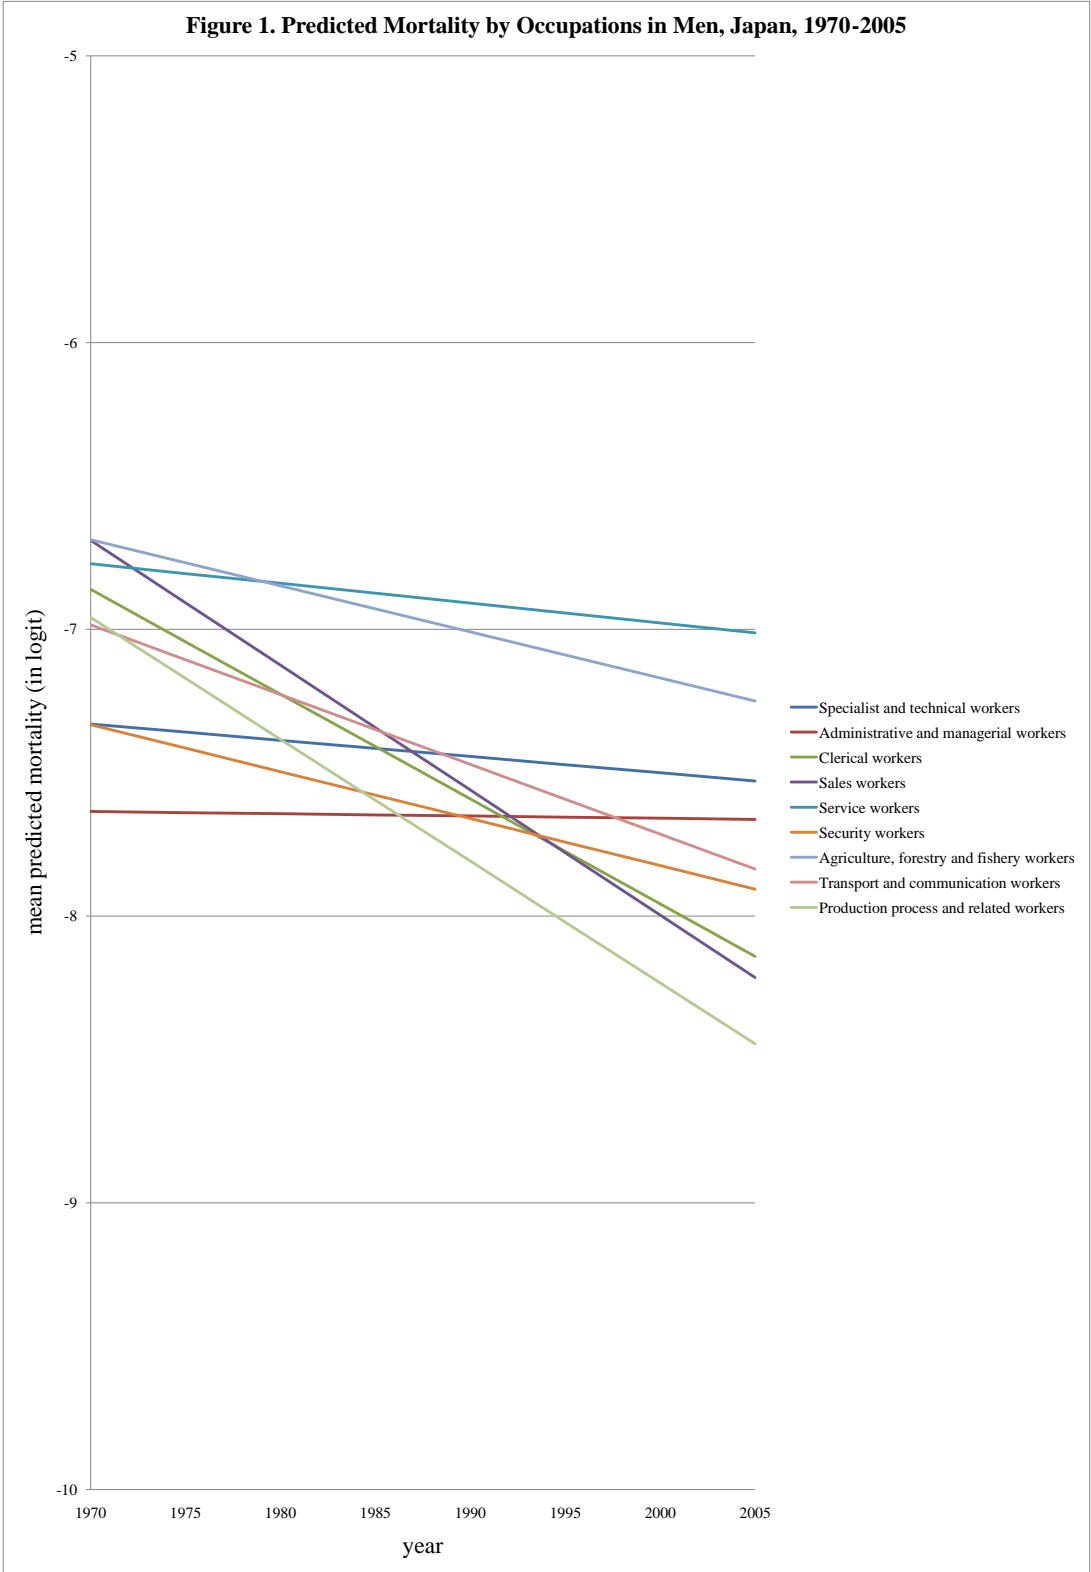

1  
2  
3  
4  
5  
6  
7  
8  
9  
10  
11  
12  
13  
14  
15  
16  
17  
18  
19  
20  
21  
22  
23  
24  
25  
26  
27  
28  
29  
30  
31  
32  
33  
34  
35  
36  
37  
38  
39  
40  
41  
42  
43  
44  
45  
46  
47  
48  
49  
50  
51  
52  
53  
54  
55  
56  
57  
58  
59  
60

**Figure 2. Predicted Mortality by Occupations in Women, Japan, 1970-2005**

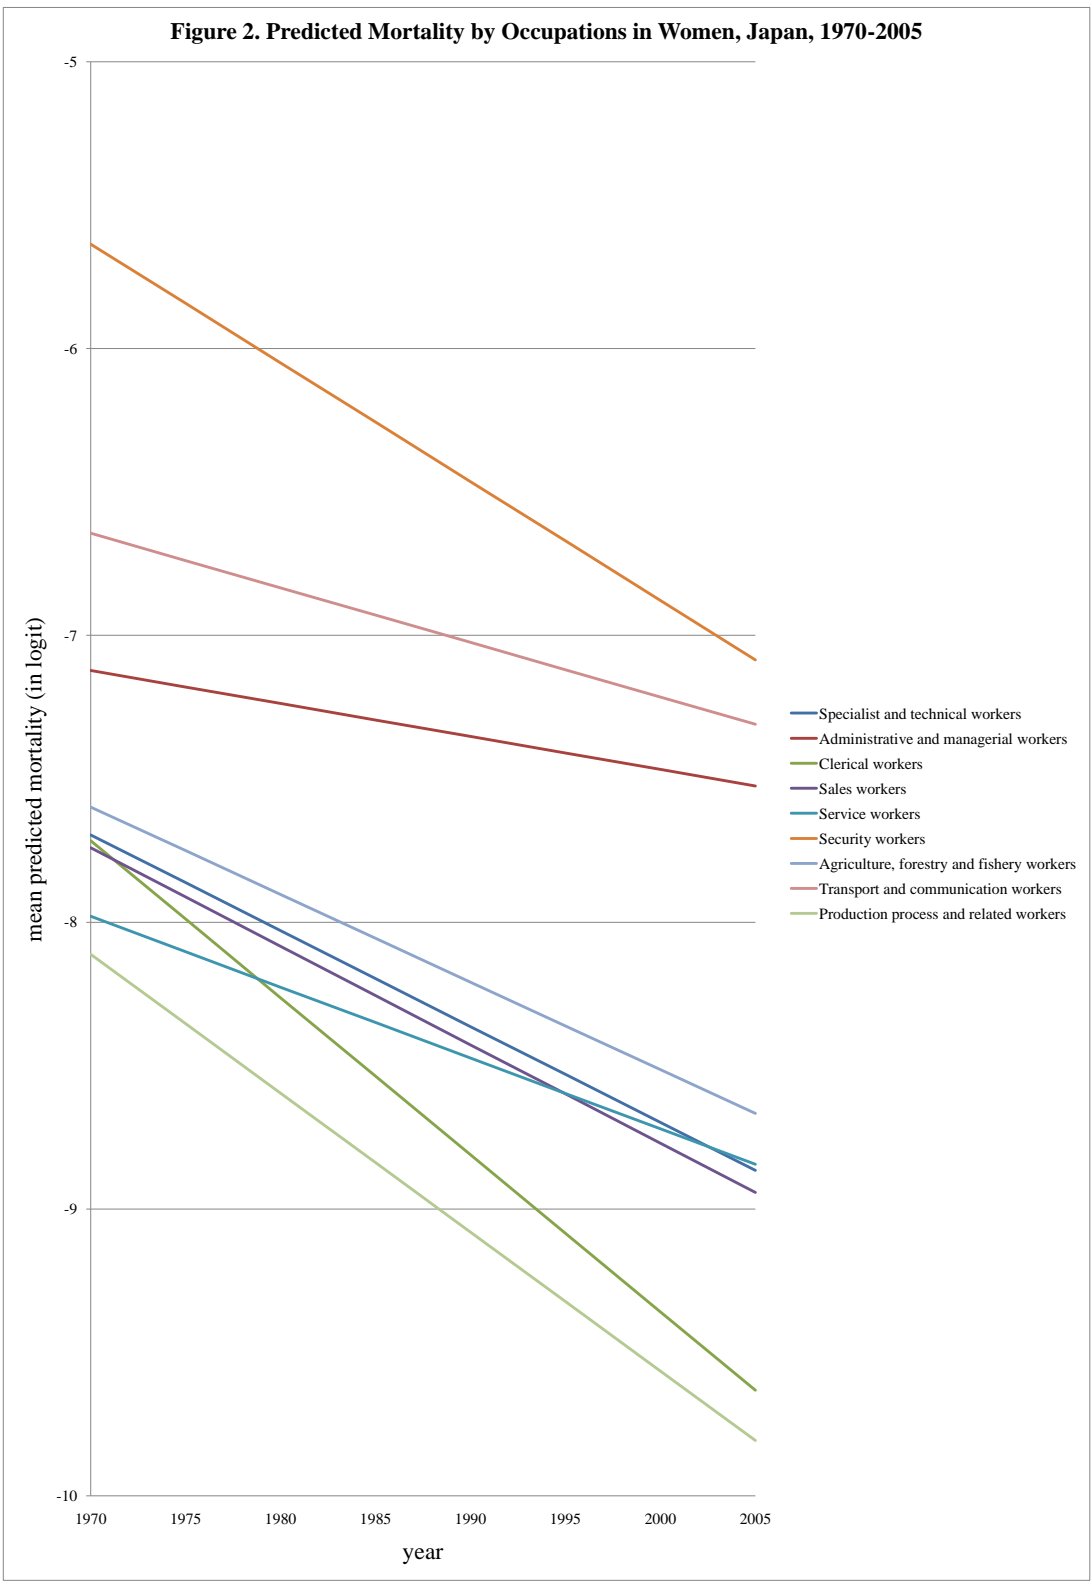

1  
2  
3  
4  
5  
6  
7  
8  
9  
10  
11  
12  
13  
14  
15  
16  
17  
18  
19  
20  
21  
22  
23  
24  
25  
26  
27  
28  
29  
30  
31  
32  
33  
34  
35  
36  
37  
38  
39  
40  
41  
42  
43

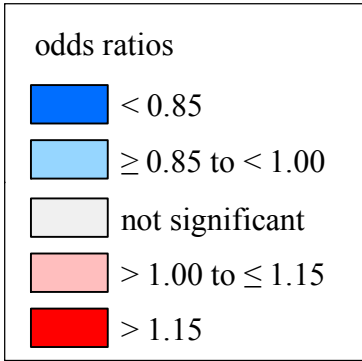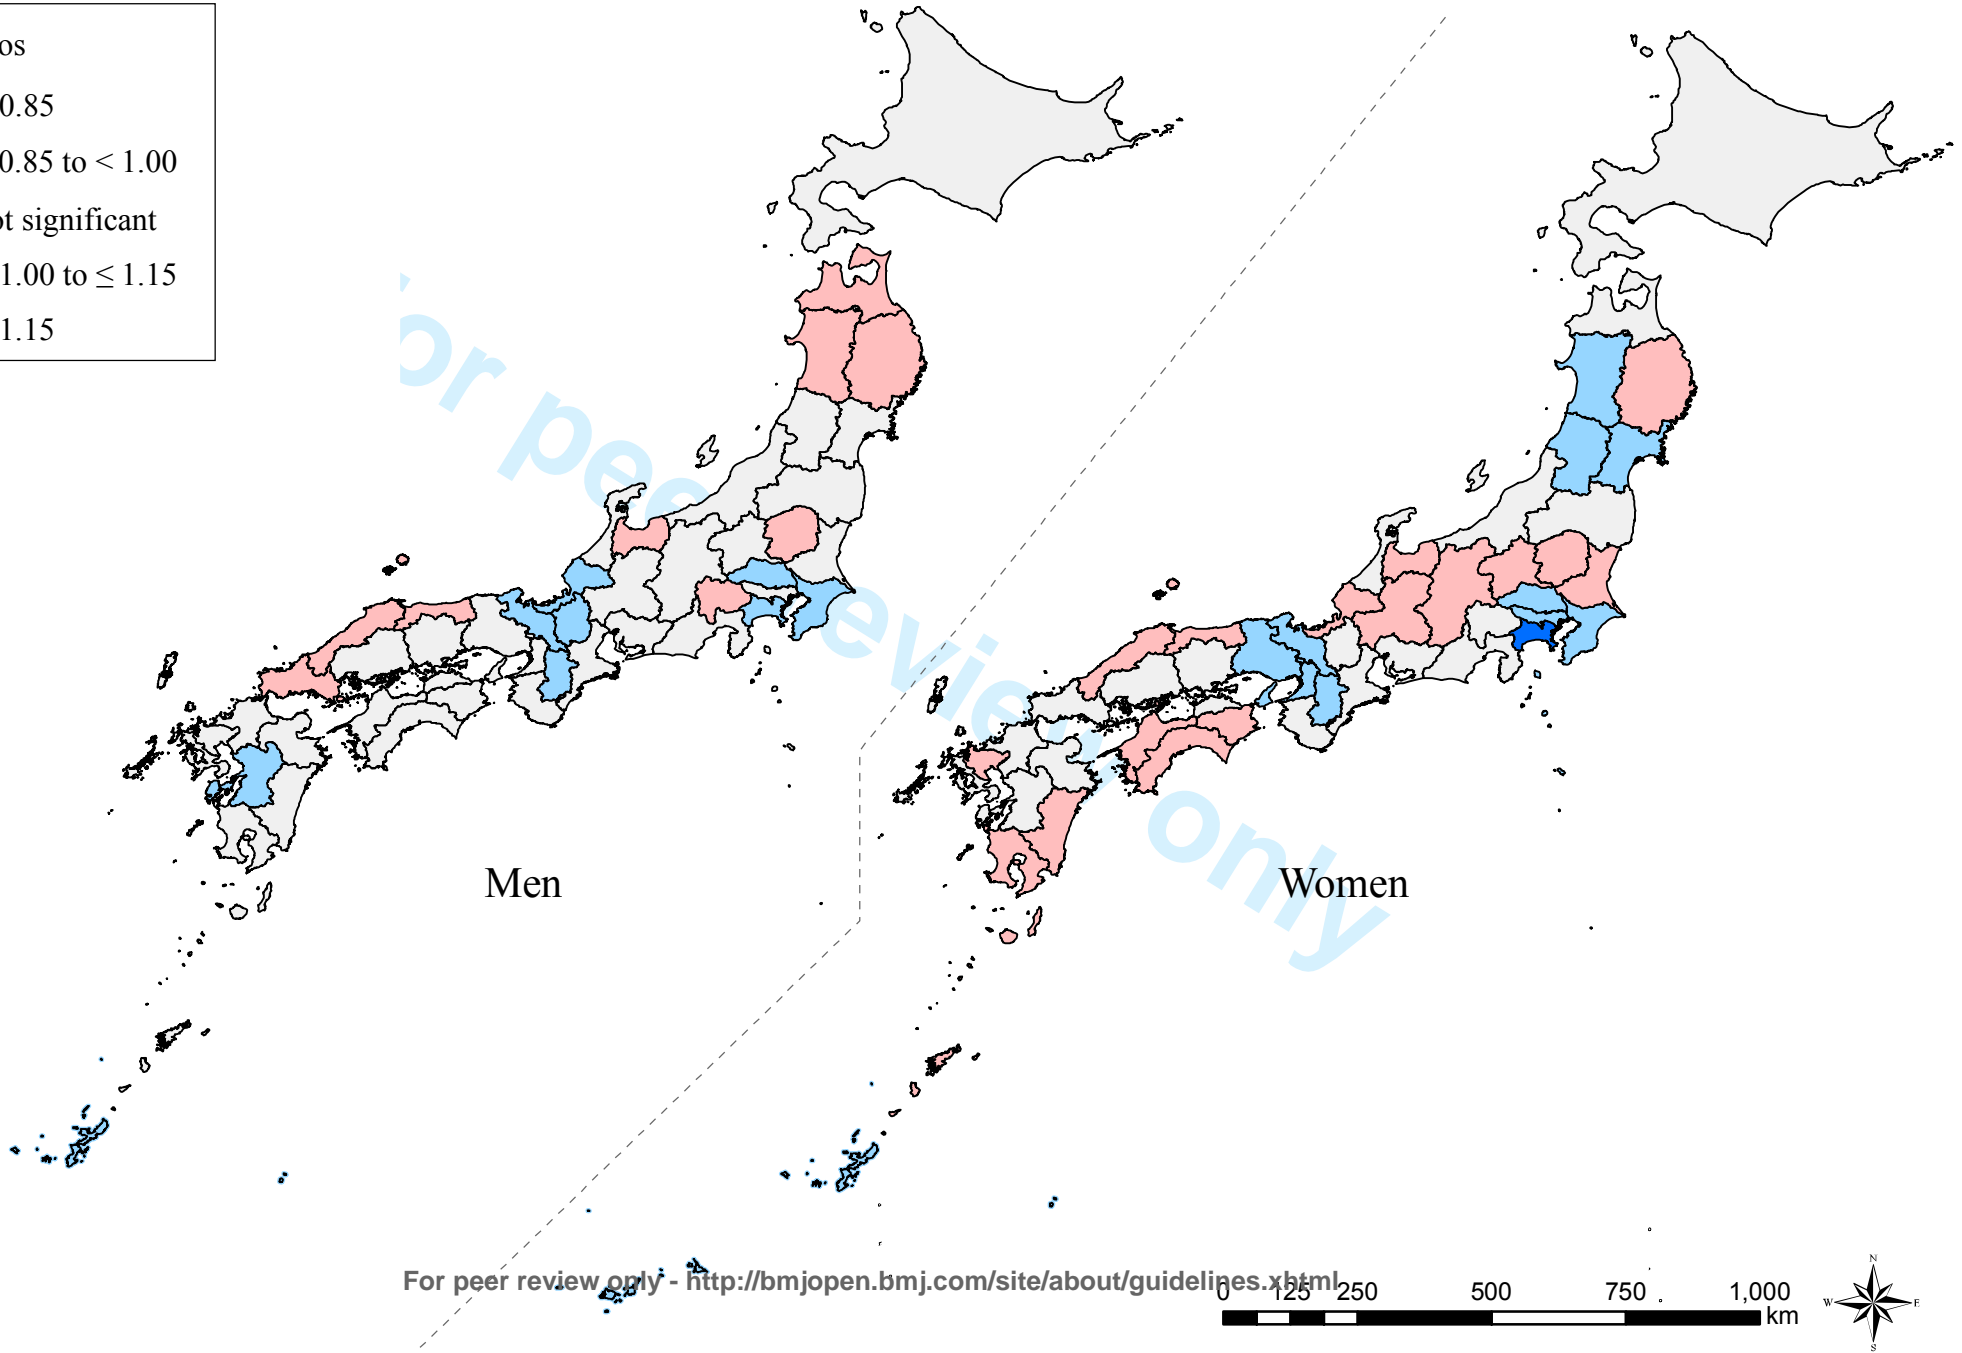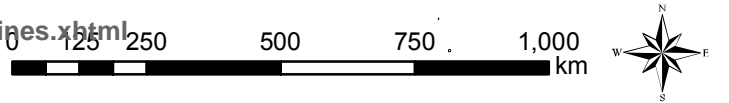

STROBE Statement—Checklist of items that should be included in reports of *cohort studies*

|                              | Item No | Recommendation                                                                                                                                                                                    |     |
|------------------------------|---------|---------------------------------------------------------------------------------------------------------------------------------------------------------------------------------------------------|-----|
| <b>Title and abstract</b>    | 1       | (a) Indicate the study's design with a commonly used term in the title or the abstract                                                                                                            | Yes |
|                              |         | (b) Provide in the abstract an informative and balanced summary of what was done and what was found                                                                                               | Yes |
| <b>Introduction</b>          |         |                                                                                                                                                                                                   |     |
| Background/rationale         | 2       | Explain the scientific background and rationale for the investigation being reported                                                                                                              | Yes |
| Objectives                   | 3       | State specific objectives, including any prespecified hypotheses                                                                                                                                  | Yes |
| <b>Methods</b>               |         |                                                                                                                                                                                                   |     |
| Study design                 | 4       | Present key elements of study design early in the paper                                                                                                                                           | Yes |
| Setting                      | 5       | Describe the setting, locations, and relevant dates, including periods of recruitment, exposure, follow-up, and data collection                                                                   | Yes |
| Participants                 | 6       | (a) Give the eligibility criteria, and the sources and methods of selection of participants. Describe methods of follow-up                                                                        | Yes |
|                              |         | (b) For matched studies, give matching criteria and number of exposed and unexposed                                                                                                               | NA  |
| Variables                    | 7       | Clearly define all outcomes, exposures, predictors, potential confounders, and effect modifiers. Give diagnostic criteria, if applicable                                                          | Yes |
| Data sources/<br>measurement | 8*      | For each variable of interest, give sources of data and details of methods of assessment (measurement). Describe comparability of assessment methods if there is more than one group              | NA  |
| Bias                         | 9       | Describe any efforts to address potential sources of bias                                                                                                                                         | Yes |
| Study size                   | 10      | Explain how the study size was arrived at                                                                                                                                                         | NA  |
| Quantitative variables       | 11      | Explain how quantitative variables were handled in the analyses. If applicable, describe which groupings were chosen and why                                                                      | Yes |
| Statistical methods          | 12      | (a) Describe all statistical methods, including those used to control for confounding                                                                                                             | Yes |
|                              |         | (b) Describe any methods used to examine subgroups and interactions                                                                                                                               | Yes |
|                              |         | (c) Explain how missing data were addressed                                                                                                                                                       | NA  |
|                              |         | (d) If applicable, explain how loss to follow-up was addressed                                                                                                                                    | NA  |
|                              |         | (e) Describe any sensitivity analyses                                                                                                                                                             | Yes |
| <b>Results</b>               |         |                                                                                                                                                                                                   |     |
| Participants                 | 13*     | (a) Report numbers of individuals at each stage of study—eg numbers potentially eligible, examined for eligibility, confirmed eligible, included in the study, completing follow-up, and analysed | Yes |
|                              |         | (b) Give reasons for non-participation at each stage                                                                                                                                              | NA  |
|                              |         | (c) Consider use of a flow diagram                                                                                                                                                                | NA  |
| Descriptive data             | 14*     | (a) Give characteristics of study participants (eg demographic, clinical, social) and information on exposures and potential confounders                                                          | Yes |
|                              |         | (b) Indicate number of participants with missing data for each variable of interest                                                                                                               | NA  |
|                              |         | (c) Summarise follow-up time (eg, average and total amount)                                                                                                                                       | NA  |
| Outcome data                 | 15*     | Report numbers of outcome events or summary measures over time                                                                                                                                    | Yes |
| Main results                 | 16      | (a) Give unadjusted estimates and, if applicable, confounder-adjusted estimates and their precision (eg, 95% confidence interval). Make clear which                                               | Yes |

|                          |    |                                                                                                                                                                            |     |
|--------------------------|----|----------------------------------------------------------------------------------------------------------------------------------------------------------------------------|-----|
|                          |    | confounders were adjusted for and why they were included                                                                                                                   |     |
|                          |    | (b) Report category boundaries when continuous variables were categorized                                                                                                  | Yes |
|                          |    | (c) If relevant, consider translating estimates of relative risk into absolute risk for a meaningful time period                                                           | Yes |
| Other analyses           | 17 | Report other analyses done—eg analyses of subgroups and interactions, and sensitivity analyses                                                                             | Yes |
| <b>Discussion</b>        |    |                                                                                                                                                                            |     |
| Key results              | 18 | Summarise key results with reference to study objectives                                                                                                                   | Yes |
| Limitations              | 19 | Discuss limitations of the study, taking into account sources of potential bias or imprecision. Discuss both direction and magnitude of any potential bias                 | Yes |
| Interpretation           | 20 | Give a cautious overall interpretation of results considering objectives, limitations, multiplicity of analyses, results from similar studies, and other relevant evidence | Yes |
| Generalisability         | 21 | Discuss the generalisability (external validity) of the study results                                                                                                      | Yes |
| <b>Other information</b> |    |                                                                                                                                                                            |     |
| Funding                  | 22 | Give the source of funding and the role of the funders for the present study and, if applicable, for the original study on which the present article is based              | Yes |

\*Give information separately for exposed and unexposed groups.

**Note:** An Explanation and Elaboration article discusses each checklist item and gives methodological background and published examples of transparent reporting. The STROBE checklist is best used in conjunction with this article (freely available on the Web sites of PLoS Medicine at <http://www.plosmedicine.org/>, Annals of Internal Medicine at <http://www.annals.org/>, and Epidemiology at <http://www.epidem.com/>). Information on the STROBE Initiative is available at <http://www.strobe-statement.org>.



1  
2  
3  
4 **1 Social and Geographic Inequalities in Premature Adult Mortality in Japan:**

5  
6  
7 **2 Observational Study from 1970 to 2005**

8  
9  
10 3 Etsuji Suzuki, Saori Kashima, Ichiro Kawachi, S V Subramanian

11  
12 4

13  
14  
15 5 Department of Epidemiology, Okayama University Graduate School of Medicine,

16  
17 6 Dentistry and Pharmaceutical Sciences, 2-5-1 Shikata-cho, Kita-ku, Okayama

18  
19  
20 7 700-8558, Japan

21  
22 8 Etsuji Suzuki *assistant professor*, Saori Kashima

23  
24  
25 9 Department of Public Health and Health Policy, Hiroshima University Graduate

26  
27  
28 10 School of Biomedical Sciences, 1-2-3 Kasumi, Minami-ku, Hiroshima 734-8551,

29  
30  
31 11 Japan

32  
33 12 Saori Kashima *assistant professor*

34  
35  
36 13 Department of Society, Human Development, and Health, Harvard School of Public

37  
38 14 Health, 677 Huntington Avenue, Boston, MA 02115, USA

39  
40  
41 15 Ichiro Kawachi *professor of social epidemiology and chair*, S V Subramanian

42  
43 16 *professor of population health and geography*

44  
45  
46 17 Correspondence to:

47  
48  
49 18 E Suzuki etsuji-s@cc.okayama-u.ac.jp; S V Subramanian svsubram@hsph.harvard.edu

## 1 Abstract

2 **Objectives:** To examine trends in social and geographic inequalities in all-cause  
3 premature adult mortality [in Japan from 1970 through 2005](#).

4 **Design:** [Data were derived from the Vital Statistics and the Census](#), [The participants](#)  
5 [were entire population aged 25 or older and less than 65 in 1970, 1975, 1980, 1985,](#)  
6 1990, 1995, 2000, and 2005. The total number of decedents was 984,022 and 532,223  
7 in men and women, respectively. For each sex, odds ratios ([ORs](#)) and 95% confidence  
8 intervals ([CIs](#)) for mortality were estimated by using multilevel logistic regression  
9 models with “cells” (cross-tabulated by age and occupation) at level 1, eight years at  
10 level 2, and 47 prefectures at level 3. The prefecture-level variance was used as an  
11 estimate of geographic inequalities of mortality.

12 **Results:** Adjusting for age and time-trends, compared with production process and  
13 related workers, [ORs](#) ranged from 0.97 (95% [CI](#) 0.96 to 0.98) among administrative  
14 and managerial workers to 2.22 (2.19 to 2.24) among service workers in men. By  
15 contrast, in women, the lowest odds for mortality was observed among production  
16 process and related workers (reference) while the highest [OR](#) was 12.22 (11.40 to  
17 13.10) among security workers. The degree of [occupational inequality](#) increased in  
18 both sexes. Higher occupational groups did not experience reductions in mortality

Deleted: Observational study of

Deleted: data

Deleted: ¶  
Setting: Japan.¶  
Participants:

Deleted: E

Deleted: ¶  
Main outcome measures:

Deleted: odds ratios

Deleted: confidence interval

Deleted: odds ratio

Deleted: social

1 throughout the period and was overtaken by lower occupational groups in the early  
2 1990s, among men. Conditional on individual age and occupation, overall geographic  
3 inequality of mortality were relatively small in both sexes; the ORs ranged from 0.87  
4 (Okinawa) to 1.13 (Aomori) for men and from 0.84 (Kanagawa) to 1.11 (Kagoshima)  
5 for women, even though there is a suggestion of increasing inequalities across  
6 prefectures since 1995 in both sexes.

Deleted: odds ratios

7 **Conclusion:** The present findings demonstrate that both social and geographic  
8 inequalities in all-cause mortality have increased in Japan during the last three decades.

Deleted: s

### 9 Article summary

#### 10 Article focus:

11 While Japan enjoys the highest average life expectancy in the world, less has been  
12 documented on the trends and patterns of health inequalities within the nation.

13 We examined trends in social and geographic inequalities in all-cause premature adult  
14 mortality from 1970 through 2005.

#### 15 Key messages:

16 This is the first study that simultaneously examines time trends in premature mortality  
17 by occupational class as well as geographic locality, and the results of our study

1  
2  
3  
4  
5  
6  
7  
8  
9  
10  
11  
12  
13  
14  
15  
16  
17  
18  
19  
20  
21  
22  
23  
24  
25  
26  
27  
28  
29  
30  
31  
32  
33  
34  
35  
36  
37  
38  
39  
40  
41  
42  
43  
44  
45  
46  
47  
48  
49  
50  
51  
52  
53  
54  
55  
56  
57  
58  
59  
60

1 indicate that health disparities have widened during the decades following the collapse

2 of the asset bubble in the early 1990s.

3 Given the multiple challenges that threaten to further dampen economic activity of the

4 nation, it is imperative to continue to monitor future trends in health inequalities in

5 order to avert the potential impacts on Japan's health security.

6 **Strengths and limitations of this study:**

7 The data are census based and cover the whole of Japan from 1970 through 2005.

8 This study uses multilevel methods to properly adjust for micro- and macro-level bias

9 simultaneously.

10 We lacked information on whether the individuals were in standard jobs or precarious

11 jobs.

## 1 INTRODUCTION

2  
3  
4  
5  
6  
7 The postwar Constitution (1946) of Japan made equality a primary objective of the  
8  
9  
10 health system, and by 1961, the country achieved universal and compulsory health  
11  
12 insurance coverage.<sup>1</sup> Although Japanese longevity was well below that of most  
13  
14 European countries in 1960, subsequent health gains enabled the country to overtake  
15  
16 other nations to the point where Japan reached the top of the national life expectancy  
17  
18 rankings by 1985.<sup>12</sup> During the period of rapid economic growth (mid-1960s to 1989),  
19  
20 Japan's social and economic policies helped to create a broad middle class with secure  
21  
22 (often life-long) employment and comparatively egalitarian growth in living standards  
23  
24 across the income spectrum.<sup>13</sup> Following the collapse of the asset bubble in the early  
25  
26  
27  
28  
29  
30 1990s, however, Japan's economy has been characterized by persistently low growth  
31  
32 accompanied by a marked increase in the number of precarious workers (i.e.,  
33  
34 non-standard jobs such as part-time and contingent workers), from 1 in 5 employees in  
35  
36 the 1990s to 1 in 3 employees by 2005.<sup>4</sup> The period since the collapse of the asset  
37  
38 bubble – now referred to as the “Lost Two Decades” – has been characterized by a  
39  
40  
41  
42 widening of income disparities and the emergence of a new class of “working poor”  
43  
44 hitherto unrecognized in Japanese society.<sup>5</sup> In retrospect, the post-War period of  
45  
46  
47  
48 comparatively egalitarian economic growth appears to have lasted about forty years,  
49  
50  
51  
52  
53  
54  
55  
56  
57  
58  
59  
60

1  
2  
3  
4 and today, Japan ranks closer to countries such as the United States and the UK in  
5  
6 terms of indicators of relative poverty, such as poverty rate and poverty gap.<sup>6</sup>  
7  
8

9 While there are considerable studies documenting social and geographic  
10  
11 inequalities in mortality in other industrialized countries,<sup>7-12</sup> we are not aware of a  
12  
13 similar comprehensive assessment of the trends in health inequalities in Japan that may  
14  
15 have accompanied the major macroeconomic changes.<sup>13</sup> In this study, by using  
16  
17 occupations as an indicator of socioeconomic position,<sup>14</sup> we examine the trends in  
18  
19 occupational and geographic inequalities of all-cause premature adult mortality from  
20  
21 1970 through 2005. Since premature adult mortality focuses on death occurring at  
22  
23 younger ages, they constitute a useful measure in public health as well as preventive  
24  
25 medicine.<sup>15</sup>  
26  
27  
28  
29  
30  
31  
32  
33  
34

## 35 METHODS

### 36 Data

37  
38  
39  
40 Data on deaths were, obtained from the “Report of Vital Statistics: Occupational and  
41  
42 Industrial Aspects”,<sup>16</sup> which has been conducted by the Ministry of Health, Labour and  
43  
44 Welfare every five years since 1970, coinciding with the years of the Population  
45  
46 Census. The latest year for which data are available is 2005. In the notification of  
47  
48  
49  
50  
51  
52  
53  
54  
55  
56  
57  
58  
59  
60

Deleted: was

1  
2  
3  
4 deaths, the respondents are asked to fill in the occupation of decedent at the time of  
5  
6  
7 death,<sup>17</sup> and one of the following persons is obliged to submit the notification: (1)  
8  
9 relatives who live together with decedents, (2) other housemates, (3) landlord, estate  
10  
11 owner, land/house agent, or (4) relatives who do not live together with decedents. The  
12  
13  
14 occupation at the time of death is recorded for each decedent following the Japan  
15  
16 Standard Occupational Classification.<sup>18</sup> During the follow-up period, the occupational  
17  
18 classification scheme underwent four revisions (Supplementary Table 1).<sup>18</sup> In this study,  
19  
20 we used the fourth revision of the Occupational Classification, which includes the  
21  
22 following 11 groups<sup>18</sup>: (1) specialist and technical workers, (2) administrative and  
23  
24 managerial workers, (3) clerical workers, (4) sales workers, (5) service workers, (6)  
25  
26 security workers, (7) agriculture, forestry and fishery workers, (8) transport and  
27  
28 communication workers, (9) production process and related workers, (10) workers not  
29  
30 classifiable by occupation, and (11) non-employed. Note that the group “production  
31  
32 process and related workers” includes mining workers. Note also that the group  
33  
34 “non-employed” includes the unemployed as well as non-labor force (e.g.,  
35  
36  
37  
38  
39  
40  
41  
42  
43 home-makers, students, and the retired). Although the Census distinguishes the  
44  
45 unemployed from home-makers, the vital records combine these categories as  
46  
47 “non-employed”.<sup>18</sup> We restricted the analysis to those who are aged 25 or older and  
48  
49  
50  
51  
52  
53  
54  
55  
56  
57  
58  
59  
60

Deleted: T

Deleted: latter category

1 less than 65 to exclude students as well as the retired. The total number of decedents  
2 was 984,022 and 532,223 in men and women, respectively (Supplementary Figure 1  
3 and Supplementary Table 2).

Deleted: was

4 Denominator data for the calculation of mortality rates were obtained from the  
5 Population Census which has been conducted by Ministry of Internal Affairs and  
6 Communications every five years since 1920.<sup>19</sup> In the questionnaire for the Census, the  
7 occupation was assessed by asking a following question: "Description of work –  
8 Describe in detail the duties you are assigned to perform".<sup>19</sup> The questionnaires are  
9 delivered to each household, and someone in each household answers the question. We  
10 used "production process and related workers" as the referent category since they were  
11 the largest occupational category in a majority of the time periods (Supplementary  
12 Table 3).

### 13 Analysis

14 The data had a three-level multilevel structure of 32,590 cells for men and 32,542 cells  
15 for women at level 1, nested within eight years at level 2, nested within 47 prefectures  
16 at level 3. The eight years comprised of 1970, 1975, 1980, 1985, 1990, 1995, 2000,  
17 and 2005. Each year had a maximum 88 cells (eight age groups times 11 occupational  
18 groups) (Supplementary Table 4). Note that the numbers of deaths for each cell are

Deleted: Note that t



1 recorded during one fiscal year. For the descriptive purpose, we first calculated  
2  
3  
4 age-adjusted mortality rates by occupational class by year and sex (Supplementary  
5  
6  
7 Table 5). We used the direct method, using the model population of 1985 as a  
8  
9  
10 reference.<sup>20</sup> The model population of 1985 is based on the Japanese population under  
11  
12 census of 1985 and it is created on the basis of 1,000 persons as 1 unit, after adjusting  
13  
14 radical increase or decrease such as baby boom.<sup>21</sup> We then employed multilevel  
15  
16  
17 statistical procedures because of their ability to model complex variance structures at  
18  
19  
20 multiple levels.<sup>22</sup> In the present analysis, they allow estimation of the relationship  
21  
22  
23 between mortality and occupation, conditional on individual age variation (“fixed  
24  
25  
26 parameters”) and year- and prefecture-level variations (“random parameters”). They  
27  
28  
29 also enable an estimation of the extent to which the relationship between mortality and  
30  
31  
32 occupation varies across years and prefectures (random parameters) and the degree to  
33  
34  
35 which prefecture-level socioeconomic status explains this variation (fixed parameters).  
36  
37  
38 The unit of analysis was “cells”, and structurally, our models were identical to models  
39  
40  
41 with individuals at level 1.<sup>23</sup>

42  
43 The response variable, proportion of deaths in each cell, was modeled with  
44  
45  
46 allowances made for the varying denominator in each cell. The fixed and random  
47  
48  
49 parameter estimates (along with their standard errors) for the multilevel binomial logit  
50  
51  
52  
53  
54  
55  
56  
57  
58  
59  
60

1  
2  
3  
4 link model were calibrated using predictive/penalized quasi-likelihood procedures with  
5  
6 second order Taylor series expansion, as implemented within the MLwiN 2.22.<sup>24</sup>  
7  
8  
9 Results are presented as odds ratios (ORs) and 95% confidence intervals (CIs). A *p*  
10  
11  
12 value of less than 0.05 (two-sided test) was considered statistically significant.

13  
14 First, we conducted three-level analysis as an overall model, with cells at level  
15  
16  
17 1, years at level 2, and prefectures at level 3. The prefecture-level variance was used as  
18  
19 an estimate of geographic inequalities of mortality. Prefectures were ranked by ORs  
20  
21  
22 having the whole country of Japan as reference (value = 1), and uncertainty was  
23  
24 estimated by 95% CIs. Further, to examine the temporal patterns of occupational and  
25  
26 geographic inequality of mortality across years, we also conducted two-level analysis,  
27  
28  
29 with cells at level 1 and prefectures at level 2 separately for each year.  
30  
31  
32

33 Then, to explore the temporal change of occupational inequality, we ran a  
34  
35 three-level multilevel model including a fixed cross-level interaction effect between  
36  
37  
38 the 11 occupations (at level 1) and year (at level 2). In this analysis, we modeled the  
39  
40  
41 year as a continuous variable, and we calculated mean predicted probabilities for  
42  
43  
44 mortality among those aged 25 to 29 (referent category).

45  
46 To present the results of geographic inequality in all-cause mortality, we  
47  
48  
49 created maps showing prefecture-level residuals by using the ArcGIS (ESRI Japan Inc.,  
50  
51  
52

Deleted: odds ratios

Deleted: confidence intervals

Deleted: social

Deleted: social

1 version 9.3).

2

### 3 RESULTS

#### 4 Social inequality of mortality

5 Table 1 shows the results of social inequality of all-cause mortality in terms of  
 6 occupation from overall model as well as year-specific models. Excluding workers not  
 7 classifiable by occupation and non-employed, there were substantial health disparities  
 8 by occupations in both sexes. Adjusting for age and time-trends in the overall model,  
 9 compared with production process and related workers, ORs ranged from 0.97 (95%  
 10 CI 0.96 to 0.98) among administrative and managerial workers to 2.22 (95% CI 2.19 to  
 11 2.24) among service workers in men. Among women, the lowest odds for mortality  
 12 was observed among production process and related workers (reference) while the  
 13 highest OR was 12.22 (95% CI 11.40 to 13.10) among security workers.

14 The degree of occupational inequality increased in both sexes. Among men, in  
 15 1970, the lowest OR was 0.54 (95% CI 0.53 to 0.56) among administrative and  
 16 managerial workers while the highest OR was 1.34 (95% CI 1.32 to 1.37) among  
 17 agriculture, forestry and fishery workers. In 2005, however, the lowest odds for  
 18 mortality was observed among production process and related workers (reference)

Deleted: odds ratios

Deleted: confidence interval

Deleted: odds ratio

Deleted: social

Deleted: odds ratio

Deleted: odds ratio

1  
2  
3  
4 | whereas the highest OR was 3.97 (95% CI 3.84 to 4.11) among service workers.

Deleted: odds ratio

5  
6  
7 | 2 Among women, the lowest odds for mortality was observed among production process

8  
9  
10 | 3 and related workers (reference) throughout the follow-up period, and the highest ORs

Deleted: odds ratios

11  
12 | 4 in 1970 and 2005 were 11.43 (95% CI 9.14 to 14.29) and 16.25 (95% CI 13.65 to

13  
14 | 5 19.34), respectively, among security workers.

Deleted: social

15  
16 | 6 Figures 1 and 2 show the temporal pattern of these occupational inequalities

17  
18  
19 | 7 across years. We excluded workers not classifiable by occupation and non-employed

20  
21  
22 | 8 from these Figures to enhance readability although they were included in the analysis.

23  
24  
25 | 9 Among men, the mortality risk among three occupations (specialist and technical

26  
27  
28 | 10 workers, administrative and managerial workers, and service workers) remained

29  
30  
31 | 11 unchanged, whereas those of other occupation groups declined more or less. Especially,

32  
33  
34 | 12 in addition to the workers not classifiable by occupation, three occupations (clerical

35  
36  
37 | 13 workers, sales workers, and product process and related workers) experienced a

38  
39  
40 | 14 considerable decline in mortality risk between 1970 and 2005.

41  
42 | 15 By contrast, trends in mortality by occupational groups were more stable for

43  
44 | 16 women. Most occupations experienced the comparable trajectories during the period

45  
46  
47 | 17 although administrative and managerial workers experienced relatively small declines

48  
49  
50 | 18 in mortality risk. Specialist and technical workers and service workers also

1 experienced declines in mortality risk among women although they remained on a  
2 plateau among men.

### 3 **Geographic inequality of mortality**

4 Conditional on individual age and occupation, overall geographic inequality of  
5 mortality were relatively small across prefectures in both sexes, with slightly larger  
6 geographic inequality among women than men (Table 2). Prefecture-specific [ORs](#)  
7 ranged from 0.87 (Okinawa prefecture) to 1.13 (Aomori prefecture) for men and from  
8 0.84 (Kanagawa prefecture) to 1.11 (Kagoshima prefecture) for women  
9 (Supplementary Tables [6](#) and [7](#)). Figure 3 shows the results of geographic inequalities  
10 in mortality. We observed similar patterns in both sexes although they led to opposite  
11 results between the sexes in Akita and Fukui prefectures; in Akita, the mortality risk  
12 was higher in men whereas it was lower in women. In Fukui, however, the pattern was  
13 reversed.

14 Although overall geographic inequalities of mortality were relatively small,  
15 they appear to have increased over time (Table 2). In men, although prefecture-level  
16 variance was less pronounced until 1990 (around 0.003 on logit scale), it began to  
17 increase since 1995 steadily to 0.011 in 2005. By contrast, in women the  
18 prefecture-level variance (on logit scale) was 0.007 in 1970s, and it declined to 0.004

Deleted: odds ratios

Deleted: 5

Deleted: 6

1  
2  
3  
4 in 1990, and then increased up to 0.012 in 2005. The adjusted [ORs](#) and 95% [CIs](#) for  
5  
6 mortality in each prefecture across years are shown in Supplementary Tables [6](#) and [7](#).

Deleted: odds ratios

Deleted: confidence intervals

Deleted: 5

Deleted: 6

7  
8  
9 In 1970, [ORs](#) ranged from 0.89 (Gifu prefecture) to 1.12 (Akita prefecture) for men

Deleted: odds ratios

10  
11 and from 0.79 (Tokyo) to 1.14 (Kagoshima prefecture) for women. In 2005, the ranges

Deleted: odds ratios

12  
13 were widened, and [ORs](#) ranged from 0.81 (Nara prefecture) to 1.27 (Aomori

14  
15 prefecture) for men and from 0.75 (Nara prefecture) to 1.18 (Kochi prefecture) for

16  
17 women. We show geographic and temporal variation in mortality, suggesting an

18  
19 increase in geographic inequalities across prefectures since 1995 in both sexes

20  
21 (Supplementary Figures 2 and 3 and Video).

## 22 23 24 25 26 27 28 **Supplementary analyses**

29  
30 We examined two additional issues to further explore the [occupational](#) and

Deleted: social

31  
32 geographic inequalities in premature mortality; (i) the patterns of geographic

33  
34 inequalities in mortality by occupations, and (ii) the presence of contextual effects of

35  
36 prefecture-level socioeconomic status on mortality risk (Supplementary Text,

37  
38  
39  
40  
41  
42  
43  
44  
45  
46  
47  
48  
49  
50  
51  
52  
53  
54  
55  
56  
57  
58  
59  
60  
Supplementary Figures 4 and 5, Supplementary Tables [8](#) and [9](#)).

Deleted: 7

Deleted: 8

## 17 **DISCUSSION**

### 18 **Summary of findings**

1  
2  
3  
4 1 The findings of the present study suggest that the economic trends during the past 35  
5  
6  
7 2 years have been accompanied by a widening of health inequalities between  
8  
9  
10 3 occupational classes as well as geographic areas of the country. The post-bubble  
11  
12 4 economy has been characterized by lackluster growth combined with a dramatic shift  
13  
14  
15 5 in the work-force away from life-long employment towards more precarious  
16  
17 6 employment.<sup>4</sup> This economic restructuring has increased pressure on workers in  
18  
19  
20 7 managerial and professional workers (primarily men) who are being squeezed to raise  
21  
22 8 their productivity. The changing pattern of health inequalities across occupational  
23  
24  
25 9 groups is consistent with this interpretation, i.e., the stalled decline in premature  
26  
27  
28 10 mortality among white collar workers relative to other occupational classes.

### 30 **Comparison with other studies**

31  
32  
33 12 The present findings suggest that the health effects of the changing economic  
34  
35  
36 13 conditions depend on individual's socioeconomic circumstances. A previous study in  
37  
38  
39 14 Japan demonstrated that, although self-rated health improved for both sexes throughout  
40  
41  
42 15 the economic crisis of the 1990s, health disparities in relation to occupations widened,  
43  
44 16 especially among men.<sup>25</sup> They also reported that middle-class male workers and female  
45  
46 17 homemakers seemed to be particularly adversely affected by the crisis.<sup>25</sup> The present  
47  
48  
49 18 study, however, provides a different pattern of widening health disparities in both sexes.

1  
2  
3  
4 1 For men, absolute health status improvement was observed only among some lower  
5  
6  
7 2 occupational groups (e.g., production process and related workers, sales workers, and  
8  
9  
10 3 clerical workers), whereas higher occupational classes (e.g., specialist and technical  
11  
12 4 workers and administrative and managerial workers) apparently obtained no benefit  
13  
14  
15 5 throughout the period. Indeed, although they were advantaged with regard to mortality  
16  
17 6 risk in 1970s and 1980s, they were overtaken in the 1990s by those in lower  
18  
19  
20 7 occupational classes who benefited more during the same period. Of note, this  
21  
22 8 “cross-over” almost coincided with the collapse of the economic bubble in the early  
23  
24  
25 9 1990s. We note at the same time that neither male service workers nor agricultural,  
26  
27  
28 10 forestry and fishery workers experienced improvements in premature mortality  
29  
30  
31 11 throughout the period.

32  
33 12 By contrast, for women, we observe that absolute health status improved  
34  
35  
36 13 roughly to the same extent across occupational groups, and that changes in ranking  
37  
38  
39 14 were less pronounced in women compared to men. We should note that relatively few  
40  
41  
42 15 women were represented in the three occupational groups with higher risk of mortality  
43  
44  
45 16 (i.e., administrative and managerial workers, security workers, and transport and  
46  
47  
48 17 communication workers). Even excluding these occupational groups, however, health  
49  
50  
51 18 inequalities appeared to have increased in women. These findings may be explained by  
52  
53  
54  
55  
56  
57  
58  
59  
60



1  
2  
3  
4 1 differences between men and women according to the type of work and industrial  
5  
6  
7 2 sector of employment. Men are more likely to be engaged in work in the private sector  
8  
9  
10 3 as well as in parts of the economy that are more vulnerable to economic downturns  
11  
12 4 (such as finance and business services, manufacturing, construction).<sup>26</sup>  
13

#### 14 **Potential mechanisms of social inequalities in mortality**

15  
16  
17 6 The present findings provide a marked contrast to the evolution of health inequalities  
18  
19  
20 7 described in other industrialized countries. In industrialized western European and  
21  
22  
23 8 north American countries, health status typically follows a hierarchical pattern: i.e., the  
24  
25 9 lower the socioeconomic position, the worse the health status.<sup>5 8 10 11</sup> We show that this  
26  
27  
28 10 “typical” pattern of health inequalities does not necessarily apply to Japan. In contrast  
29  
30  
31 11 to Western countries, previous studies in Japan have yielded inconsistent results with  
32  
33  
34 12 regard to the relationship between socioeconomic status and health outcomes, and  
35  
36 13 lower non-manual or manual workers do not necessarily exhibit less healthy behaviors  
37  
38 14 compared with those in higher occupational classes.<sup>27-32</sup> Nevertheless, a recent study of  
39  
40  
41 15 a nationally representative sample in 2001 showed that men in lower occupational  
42  
43  
44 16 classes, such as service work, transportation, and labor work, were significantly more  
45  
46 17 likely to engage in health risk behaviors compared with professional workers.<sup>33</sup> They  
47  
48  
49 18 also showed that there is a cumulation of risky behaviors in lower female occupational  
50  
51  
52  
53  
54  
55  
56  
57  
58  
59  
60

1 classes.<sup>33</sup> Further, another cross-sectional study in Japan demonstrated that occupation  
2 was not significantly associated with psychological distress among men or women by  
3 using a nationally representative sample in 2007.<sup>34</sup> Thus, the pattern of health  
4 inequalities in the present analysis is not consistent with occupational class differences  
5 in health behaviors or psychosocial stress.

## 6 **Geographic and temporal variation in mortality**

Deleted: We

7 By applying the novel multilevel methods, the present study shows that geographic  
8 inequalities in premature mortality have also widened since 1995, [In an ecological](#)  
9 [study, Fukuda et al.<sup>35</sup> assessed the time trend of geographic health inequality in Japan,](#)  
10 [by examining the association of life expectancy and age-adjusted mortality with per](#)  
11 [capita income of prefectures and municipalities. While excluding Okinawa prefecture](#)  
12 [from the analyses, they found a possible increase in geographic health inequalities](#)  
13 [from 1995 to 2000, following a decrease from 1955 to 1995.<sup>35</sup>](#) Note that the present  
14 study examined geographic inequalities, conditional on individual age and occupation,  
15 providing suggestive evidence of “common ecologic effects” of place where people  
16 live.<sup>36</sup> Broadly speaking, since 1995, higher mortality risk has been consistently  
17 observed in the northeastern region in the main island (Tohoku region) for both sexes.  
18 Overall, the economic conditions of the predominantly rural areas in the region may be

Deleted: which is consistent with  
a previous finding from an  
ecological study in Japan.

1 characterized by population decline, population aging, and lower per capita income.<sup>19</sup>

2 <sup>37</sup> Notably, however, not all rural prefectures have undergone the same transition;  
3 indeed some rural prefectures (such as Nara and Okayama) had moved up through the  
4 ranks as having significantly lower mortality for both sexes in 2005. In the  
5 supplementary analysis, no clear associations were found with prefecture-level  
6 socioeconomic variables, and it remains unknown what contributed to these distinct  
7 patterns. These patterns deserve further attention in future studies.

### 8 **Limitations of the study**

Deleted: A

9 There are some limitations of our analysis. First, although we were able to conduct a  
10 fairly detailed analysis of trends by occupational class, [neither the status in](#)  
11 [employment nor the predominant type of employment contract was available, and in](#)  
12 [particular,](#) we lacked information on whether the individuals were in standard jobs or  
13 precarious jobs. Given the conspicuous increase in the proportion of the labor force  
14 engaged in non-standard work,<sup>4</sup> as well as mounting evidence that precarious work is  
15 associated with worse health,<sup>38</sup> future work needs to examine whether the changing  
16 character of the workforce in Japan is contributing to widening health inequalities.

Deleted: O

17 Second, occupation at the time of death was used in our numerator data,  
18 which may not necessarily reflect the individual's life-course socioeconomic

1  
2  
3  
4 position.<sup>39 40</sup> If unhealthy workers selectively exited some occupations, this would have  
5  
6  
7 led to an under-estimation of mortality in those sectors. The proportion of agricultural  
8  
9  
10 workers significantly decreased during the study period for both sexes, as well as that  
11  
12 of administrative and managerial workers (for men). However, this may reflect real  
13  
14 trends in the work-force.  
15

16  
17 Third, considering the possible discrepancies of the respondents on the two  
18  
19 occasions (i.e., the notification of deaths and the census), we should note the potential  
20  
21 for numerator denominator bias between the two sources of information. In particular,  
22  
23 the possibility of measurement error in occupation at the time of death cannot be ruled  
24  
25 out – the person recording the notification of deaths may either promotes the deceased  
26  
27 to a higher status job or demotes them because the respondents did not know the  
28  
29 details of the deceased's job.  
30  
31  
32  
33

Deleted: T

34  
35  
36 Fourth, the smallest geographic unit available was the prefecture (of which  
37  
38 there are 47), and we could not explore geographic inequalities in finer detail. However,  
39  
40  
41 the prefecture may be a useful and valid unit of analysis since it is the unit that has  
42  
43 direct administrative authority in the economic, education, and health sectors.<sup>1</sup>  
44  
45  
46 Furthermore, the prefecture has specific jurisdiction over health centers, which is the  
47  
48 locus of preventive health care activity in Japan.<sup>1</sup> Note also that the boundaries  
49  
50  
51  
52  
53  
54  
55  
56  
57  
58  
59  
60

1  
2  
3  
4 1 between prefectures have not changed since the Meiji Restoration (1867), enabling  
5  
6  
7 2 long-term analysis.<sup>1</sup> Since previous studies demonstrated that the choice of geographic  
8  
9  
10 3 units as well as area-based measures is critical in the investigation of geographic  
11  
12 4 inequalities,<sup>41 42</sup> these issues warrant further examination.

## 14 **Conclusions**

15  
16  
17 6 The present findings demonstrate that both social and geographic inequalities in  
18  
19  
20 7 premature adult mortality have increased during Japan's "Lost Two Decades"  
21  
22  
23 8 following the collapse of the asset bubble. As a nation, Japan must grapple with the  
24  
25  
26 9 triple demographic trends of declining fertility, population aging, and overall  
27  
28 10 population decline. These trends threaten to further dampen economic activity,  
29  
30  
31 11 escalating the load on the social security system. In addition, Japan now faces multiple  
32  
33  
34 12 challenges in the wake of the earthquake and tsunami on March 11, 2011, and this may  
35  
36  
37 13 further place downward momentum on the nation's struggling economy. Given these  
38  
39  
40 14 momentous challenges, it is imperative to continue to monitor future trends in health  
41  
42  
43  
44  
45  
46  
47  
48  
49  
50  
51  
52  
53  
54  
55  
56  
57  
58  
59  
60 15 inequalities in order to avert the potential impacts on Japan's health security.

## References

1. Hasegawa T. Japan: Historical and current dimensions of health and health equity. In: Evans T, Whitehead M, Diderichsen F, Bhuiya A, Wirth M, editors. *Challenging Inequities in Health: From Ethics to Action*. New York, NY: Oxford University Press, 2001:90-103.
2. Marmot MG, Davey Smith G. Why are the Japanese living longer? *BMJ* 1989;299:1547-51.
3. Bezruchka S, Namekata T, Siström MG. Interplay of politics and law to promote health: improving economic equality and health: the case of postwar Japan. *Am J Public Health* 2008;98:589-94.
4. Ministry of Internal Affairs and Communications. Labour Force Survey. <http://www.stat.go.jp/english/data/roudou/index.htm>.
5. Kagamimori S, Gaina A, Naser Moaddeli A. Socioeconomic status and health in the Japanese population. *Soc Sci Med* 2009;68:2152-60.
6. OECD. *OECD Factbook 2010: Economic, Environmental and Social Statistics*: OECD Publishing.
7. Friel S, Marmot MG. Action on the social determinants of health and health inequities goes global. *Annu Rev Public Health* 2011;32:225-36.

### Deleted: What is already known on this subject:

A recent review article discussed the impact of individuals' socioeconomic position on health in Japan with regard to educational attainment, occupational gradient/class, income level, and unemployment. Taken together, the results of these studies show that the patterns of health inequalities in Japan are not necessarily the same in terms of size, pattern, distribution, magnitude, and impact compared to Western countries.

While Japan enjoys the highest average life expectancy in the world, less has been documented on the trends and patterns of health inequalities within the nation.

### What this study adds:

This is the first study that simultaneously examines time trends in premature mortality by occupational class as well as geographic locality, and the results of our study indicate that health disparities have widened during the decades following the collapse of the asset bubble in the early 1990s.

Given the multiple challenges that threaten to further dampen economic activity of the nation, it is imperative to continue to

... [1]

- 1  
2  
3  
4 1 8. Braveman P, Egerter S, Williams DR. The social determinants of health: coming of  
5  
6  
7 2 age. *Annu Rev Public Health* 2011;32:381-98.  
8  
9  
10 3 9. Thomas B, Dorling D, Davey Smith G. Inequalities in premature mortality in  
11  
12 4 Britain: Observational study from 1921 to 2007. *BMJ* 2010;341:c3639.  
13  
14  
15 5 10. Mackenbach JP, Stirbu I, Roskam AJ, Schaap MM, Menvielle G, Leinsalu M, et al.  
16  
17 6 Socioeconomic inequalities in health in 22 European countries. *N Engl J Med*  
18  
19 7 2008;358:2468-81.  
20  
21  
22 8 11. Krieger N, Rehkopf DH, Chen JT, Waterman PD, Marcelli E, Kennedy M. The fall  
23  
24 9 and rise of US inequities in premature mortality: 1960-2002. *PLoS Med*  
25  
26 10 2008;5:e46. doi:10.1371/journal.pmed.0050046.  
27  
28  
29 11 12. Davey Smith G, Krieger N. Tackling health inequities. *BMJ* 2008;337:a1526.  
30  
31  
32 12 13. Catalano R, Goldman-Mellor S, Saxton K, Margerison-Zilko C, Subbaraman M,  
33  
34 13 Lewinn K, et al. The health effects of economic decline. *Annu Rev Public Health*  
35  
36 14 2011;32:431-50.  
37  
38  
39 15 14. Galobardes B, Shaw M, Lawlor DA, Davey Smith G, Lynch J. Indicators of  
40  
41 16 socioeconomic position. In: Oakes JM, Kaufman JS, editors. *Methods in Social*  
42  
43 17 *Epidemiology*. San Francisco, CA: Jossey-Bass, 2006:47-85.  
44  
45  
46 18 15. Rajaratnam JK, Marcus JR, Levin-Rector A, Chalupka AN, Wang H, Dwyer L, et  
47  
48  
49  
50  
51  
52  
53  
54  
55  
56  
57  
58  
59  
60

- 1  
2  
3  
4 1 al. Worldwide mortality in men and women aged 15-59 years from 1970 to 2010: a  
5  
6  
7 2 systematic analysis. *Lancet* 2010;375:1704-20.  
8  
9 3 16. Ministry of Health, Labour and Welfare. Overview Report of Vital Statistics in FY  
10  
11  
12 4 2005: Occupational and Industrial Aspects  
13  
14 5 <http://www.mhlw.go.jp/english/database/db-hw/orvf/index.html>.  
16  
17 6 17. Ministry of Health, Labour and Welfare. Outline of Vital Statistics in Japan.  
18  
19 7 <http://www.mhlw.go.jp/english/database/db-hw/outline/index.html>.  
20  
21  
22 8 18. Ministry of Internal Affairs and Communications. Japan Standard Occupational  
23  
24 9 Classification. <http://www.stat.go.jp/english/index/seido/shokgyou/index-co.htm>.  
25  
26  
27 10 19. Ministry of Internal Affairs and Communications. Population Census.  
28  
29 11 <http://www.stat.go.jp/english/data/kokusei/index.htm>.  
30  
31  
32 12 20. Ministry of Health, Labour and Welfare. Vital Statistics.  
33  
34 13 <http://www.mhlw.go.jp/toukei/list/81-1a.html> (in Japanese).  
35  
36  
37 14 21. Ministry of Health, Labour and Welfare. Handbook of Health and Welfare Statistics  
38  
39 15 2010. <http://www.mhlw.go.jp/english/database/db-hh/>.  
40  
41  
42 16 22. Raudenbush SW, Bryk AS. *Hierarchical Linear Models: Applications and Data*  
43  
44 17 *Analysis Methods*. 2nd ed. Thousand Oaks, CA: Sage Publications, 2002.  
45  
46  
47 18 23. Subramanian SV, Duncan C, Jones K. Multilevel perspectives on modeling census  
48  
49  
50  
51  
52  
53  
54  
55  
56  
57  
58  
59  
60



- 1  
2  
3  
4 1 data. *Environ Plann A* 2001;33:399-417.  
5  
6  
7 2 24. MLwiN Version 2.22 [program]: Centre for Multilevel Modelling, University of  
8  
9 3 Bristol, 2010.  
10  
11  
12 4 25. Kondo N, Subramanian SV, Kawachi I, Takeda Y, Yamagata Z. Economic recession  
13  
14 5 and health inequalities in Japan: analysis with a national sample, 1986-2001. *J*  
15  
16 6 *Epidemiol Community Health* 2008;62:869-75.  
17  
18  
19 7 26. Riva M, Bambra C, Easton S, Curtis S. Hard times or good times? Inequalities in  
20  
21 8 the health effects of economic change. *Int J Public Health* 2011;56:3-5.  
22  
23  
24 9 27. Kagamimori S, Kitagawa T, Nasermoaddeli A, Wang H, Kanayama H, Sekine M,  
25  
26 10 et al. Differences in mortality rates due to major specific causes between Japanese  
27  
28 11 male occupational groups over a recent 30-year period. *Ind Health*  
29  
30 12 2004;42:328-35.  
31  
32  
33 13 28. Lahelma E, Lallukka T, Laaksonen M, Martikainen P, Rahkonen O, Chandola T, et  
34  
35 14 al. Social class differences in health behaviours among employees from Britain,  
36  
37 15 Finland and Japan: the influence of psychosocial factors. *Health Place*  
38  
39 16 2010;16:61-70.  
40  
41  
42 17 29. Fukuda Y, Nakamura K, Takano T. Socioeconomic pattern of smoking in Japan:  
43  
44 18 income inequality and gender and age differences. *Ann Epidemiol* 2005;15:365-72.  
45  
46  
47  
48  
49  
50  
51  
52  
53  
54  
55  
56  
57  
58  
59  
60

- 1  
2  
3  
4 1 30. Nishi N, Makino K, Fukuda H, Tatara K. Effects of socioeconomic indicators on  
5  
6  
7 2 coronary risk factors, self-rated health and psychological well-being among urban  
8  
9  
10 3 Japanese civil servants. *Soc Sci Med* 2004;58:1159-70.  
11  
12 4 31. Takao S, Kawakami N, Ohtsu T. Occupational class and physical activity among  
13  
14 5 Japanese employees. *Soc Sci Med* 2003;57:2281-9.  
15  
16  
17 6 32. Martikainen P, Ishizaki M, Marmot MG, Nakagawa H, Kagamimori S.  
18  
19 7 Socioeconomic differences in behavioural and biological risk factors: a comparison  
20  
21 8 of a Japanese and an English cohort of employed men. *Int J Epidemiol*  
22  
23 9 2001;30:833-8.  
24  
25  
26  
27  
28 10 33. Fukuda Y, Nakamura K, Takano T. Accumulation of health risk behaviours is  
29  
30 11 associated with lower socioeconomic status and women's urban residence: a  
31  
32 12 multilevel analysis in Japan. *BMC Public Health* 2005;5:53.  
33  
34 13 doi:10.1186/1471-2458-5-53.  
35  
36  
37  
38 14 34. Inoue A, Kawakami N, Tsuchiya M, Sakurai K, Hashimoto H. Association of  
39  
40 15 occupation, employment contract, and company size with mental health in a  
41  
42 16 national representative sample of employees in Japan. *J Occup Health*  
43  
44 17 2010;52:227-40.  
45  
46  
47  
48 18 35. Fukuda Y, Nakao H, Yahata Y, Imai H. Are health inequalities increasing in Japan?  
49  
50  
51  
52  
53  
54  
55  
56  
57  
58  
59  
60

- 1  
2  
3  
4 1 The trends of 1955 to 2000. *Biosci Trends* 2007;1:38-42.  
5  
6  
7 2 36. Subramanian SV, Glymour MM, Kawachi I. Identifying causal ecologic effects on  
8  
9 health: A methodological assessment. In: Galea S, editor. *Macrosocial*  
10  
11  
12 4 *Determinants of Population Health*. New York, NY: Springer, 2007:301-31.  
13  
14  
15 5 37. Cabinet Office, Government of Japan. Prefectural Accounts.  
16  
17 6 [http://www.esri.cao.go.jp/jp/sna/sonota/kenmin/kenmin\\_top.html](http://www.esri.cao.go.jp/jp/sna/sonota/kenmin/kenmin_top.html) (in Japanese).  
18  
19  
20 7 38. Kim MH, Kim CY, Park JK, Kawachi I. Is precarious employment damaging to  
21  
22 8 self-rated health? Results of propensity score matching methods, using longitudinal  
23  
24 9 data in South Korea. *Soc Sci Med* 2008;67:1982-94.  
25  
26  
27 10 39. Landsbergis PA. Assessing the contribution of working conditions to  
28  
29 11 socioeconomic disparities in health: a commentary. *Am J Ind Med* 2010;53:95-103.  
30  
31  
32 12 40. Krieger N. Workers are people too: Societal aspects of occupational health  
33  
34 13 disparities - an ecosocial perspective. *Am J Ind Med* 2010;53:104-15.  
35  
36  
37 14 41. Krieger N, Chen JT, Waterman PD, Soobader MJ, Subramanian SV, Carson R.  
38  
39 15 Geocoding and monitoring of US socioeconomic inequalities in mortality and  
40  
41 16 cancer incidence: does the choice of area-based measure and geographic level  
42  
43 17 matter?: the Public Health Disparities Geocoding Project. *Am J Epidemiol*  
44  
45 18 2002;156:471-82.  
46  
47  
48  
49  
50  
51  
52  
53  
54  
55  
56  
57  
58  
59  
60

1  
2  
3  
4  
5  
6  
7  
8  
9  
10  
11  
12  
13  
14  
15  
16  
17  
18  
19  
20  
21  
22  
23  
24  
25  
26  
27  
28  
29  
30  
31  
32  
33  
34  
35  
36  
37  
38  
39  
40  
41  
42  
43  
44  
45  
46  
47  
48  
49  
50  
51  
52  
53  
54  
55  
56  
57  
58  
59  
60

1 42. Reijneveld SA, Verheij RA, de Bakker DH. The impact of area deprivation on  
2 differences in health: does the choice of the geographical classification matter? *J*  
3 *Epidemiol Community Health* 2000;54:306-13.

For peer review only

1  
2  
3  
4 **Acknowledgements:** The authors thank Akiko Tokinobu for her assistance with data  
5  
6  
7 collection.

8  
9 **Contributors:** SVS and ES conceived the idea and design of the study. ES led the data  
10  
11  
12 collection, data analysis, interpretation of the findings, and writing of the paper. SVS  
13  
14  
15 supervised the study and contributed to the interpretation of findings and writing of the  
16  
17  
18 manuscript. SK contributed to the data analysis, literature review, and writing of the  
19  
20  
21 manuscript. IK contributed to the interpretation of the findings and writing of the  
22  
23  
24 manuscript. All authors have read and approved the final version of the manuscript.

25 **Funding:** A part of this research was supported by a Grant-in-Aid for Scientific  
26  
27  
28 Research, Ministry of Education, Culture, Sports, Science and Technology (MEXT),  
29  
30  
31 Japan. The funding source had no role in study design, data collection, data analysis,  
32  
33  
34 data interpretation, the writing of the report, or the decision to submit for publication.

35 **Competing interests:** All authors have completed the ICMJE uniform disclosure form  
36  
37  
38 at [www.icmje.org/coi\\_disclosure.pdf](http://www.icmje.org/coi_disclosure.pdf) (available on request from the corresponding  
39  
40  
41 author) and declare: SVS is supported by a Robert Wood Johnson Investigator Award  
42  
43  
44 in Health Policy Research and by a career development award from the National  
45  
46  
47 Institutes of Health (NHLBI K25 HL081275); no financial relationships with any  
48  
49  
50 organisations that might have an interest in the submitted work in the previous 3 years;

1  
2  
3  
4 1 no other relationships or activities that could appear to have influenced the submitted

5  
6  
7 2 work.

8  
9 3 **Ethical approval:** Ethical approval was not required.

10  
11 4 **Data sharing:** No additional data available.

12  
13  
14 5 **Licence for publication statement:** The Corresponding Author has the right to grant

15  
16  
17 6 on behalf of all authors and does grant on behalf of all authors, an exclusive licence (or

18  
19  
20 7 non-exclusive for government employees) on a worldwide basis to the BMJ Group and

21  
22  
23 8 co-owners or contracting owning societies (where published by the BMJ Group on

24  
25 9 their behalf), and its Licensees to permit this article (if accepted) to be published in

26  
27  
28 10 BMJ Open and any other BMJ Group products and to exploit all subsidiary rights, as

29  
30 11 set out in our licence.  
31  
32  
33  
34  
35  
36  
37  
38  
39  
40  
41  
42  
43  
44  
45  
46  
47  
48  
49  
50  
51  
52  
53  
54  
55  
56  
57  
58  
59  
60

1  
2  
3  
4 **1 Figure legends**  
5

6  
7 **2 Figure 1. Predicted mortality by occupations in men, Japan, 1970-2005.**  
8

9 We show mean predicted probabilities for all-cause mortality by nine occupational  
10 groups among those aged 25 to 29 (referent category). We excluded workers not  
11 classifiable by occupation and non-employed.  
12  
13  
14  
15  
16

17  
18  
19  
20 **7 Figure 2. Predicted mortality by occupations in women, Japan, 1970-2005.**  
21

22 We show mean predicted probabilities for all-cause mortality by nine occupational  
23 groups among those aged 25 to 29 (referent category). We excluded workers not  
24 classifiable by occupation and non-employed.  
25  
26  
27  
28  
29

30  
31  
32  
33 **12 Figure 3. Geographic inequality of all-cause mortality, Japan, 1970-2005.**  
34

35 We show the overall geographic inequality of all-cause mortality across 47 prefectures,  
36 conditional on individual age, occupation, and year. Prefecture-level residuals are  
37 described in odds ratios with the reference being the grand mean of all the prefectures.  
38  
39  
40  
41  
42  
43  
44  
45  
46  
47  
48  
49  
50  
51  
52  
53  
54  
55  
56  
57  
58  
59  
60  
16 Prefectures with a lower and a higher estimate of odds for mortality are filled with blue  
17 and red, respectively. Regarding areas filled with gray, prefecture-level residuals were  
18 not statistically significant.

1 Table 1. Odds ratios for all-cause mortality in each occupation, Japan, 1970-2005<sup>a</sup>

|                                           | Overall |                  | 1970  |                  | 1975  |                  | 1980   |                    |
|-------------------------------------------|---------|------------------|-------|------------------|-------|------------------|--------|--------------------|
|                                           | OR      | (95% CI)         | OR    | (95% CI)         | OR    | (95% CI)         | OR     | (95% CI)           |
| <i>Men</i>                                |         |                  |       |                  |       |                  |        |                    |
| Specialist and technical workers          | 1.31    | (1.30 to 1.33)   | 0.74  | (0.72 to 0.77)   | 0.80  | (0.77 to 0.82)   | 1.18   | (1.14 to 1.21)     |
| Administrative and managerial workers     | 0.97    | (0.96 to 0.98)   | 0.54  | (0.53 to 0.56)   | 0.66  | (0.64 to 0.68)   | 0.76   | (0.74 to 0.78)     |
| Clerical workers                          | 1.20    | (1.19 to 1.21)   | 1.05  | (1.03 to 1.08)   | 1.09  | (1.06 to 1.12)   | 1.18   | (1.15 to 1.21)     |
| Sales workers                             | 1.26    | (1.25 to 1.27)   | 1.25  | (1.23 to 1.28)   | 1.26  | (1.24 to 1.29)   | 1.38   | (1.35 to 1.41)     |
| Service workers                           | 2.22    | (2.19 to 2.24)   | 1.22  | (1.18 to 1.27)   | 1.20  | (1.16 to 1.25)   | 1.93   | (1.86 to 1.99)     |
| Security workers                          | 1.05    | (1.03 to 1.08)   | 0.67  | (0.63 to 0.72)   | 0.76  | (0.72 to 0.81)   | 0.94   | (0.88 to 1.00)     |
| Agriculture, forestry and fishery workers | 1.89    | (1.87 to 1.91)   | 1.34  | (1.32 to 1.37)   | 1.48  | (1.45 to 1.51)   | 1.74   | (1.71 to 1.78)     |
| Transport and communication workers       | 1.29    | (1.28 to 1.31)   | 1.06  | (1.02 to 1.09)   | 0.98  | (0.95 to 1.02)   | 1.17   | (1.13 to 1.21)     |
| Production process and related workers    | 1.00    | Reference        | 1.00  | Reference        | 1.00  | Reference        | 1.00   | Reference          |
| Workers not classifiable by occupation    | 29.61   | (29.28 to 29.94) | 41.44 | (37.93 to 45.28) | 59.25 | (56.07 to 62.61) | 115.11 | (110.66 to 119.75) |
| Non-employed                              | 7.78    | (7.73 to 7.82)   | 5.83  | (5.73 to 5.93)   | 6.18  | (6.07 to 6.28)   | 6.68   | (6.56 to 6.80)     |
| <i>Women</i>                              |         |                  |       |                  |       |                  |        |                    |
| Specialist and technical workers          | 1.85    | (1.81 to 1.89)   | 1.64  | (1.54 to 1.74)   | 1.54  | (1.44 to 1.63)   | 1.88   | (1.77 to 2.00)     |
| Administrative and managerial workers     | 4.91    | (4.76 to 5.06)   | 3.57  | (3.26 to 3.91)   | 3.54  | (3.23 to 3.87)   | 3.17   | (2.88 to 3.50)     |
| Clerical workers                          | 1.23    | (1.20 to 1.25)   | 1.63  | (1.55 to 1.72)   | 1.35  | (1.28 to 1.42)   | 1.45   | (1.38 to 1.53)     |
| Sales workers                             | 1.80    | (1.77 to 1.83)   | 1.35  | (1.29 to 1.41)   | 1.45  | (1.38 to 1.52)   | 1.87   | (1.78 to 1.97)     |
| Service workers                           | 1.65    | (1.62 to 1.68)   | 1.11  | (1.06 to 1.17)   | 1.04  | (0.99 to 1.10)   | 1.77   | (1.68 to 1.86)     |
| Security workers                          | 12.22   | (11.40 to 13.10) | 11.43 | (9.14 to 14.29)  | 9.24  | (7.30 to 11.69)  | 11.57  | (9.07 to 14.76)    |
| Agriculture, forestry and fishery workers | 2.25    | (2.22 to 2.29)   | 1.65  | (1.60 to 1.71)   | 1.88  | (1.80 to 1.95)   | 2.18   | (2.09 to 2.28)     |
| Transport and communication workers       | 6.88    | (6.59 to 7.18)   | 4.01  | (3.53 to 4.55)   | 3.89  | (3.42 to 4.43)   | 7.07   | (6.31 to 7.91)     |
| Production process and related workers    | 1.00    | Reference        | 1.00  | Reference        | 1.00  | Reference        | 1.00   | Reference          |
| Workers not classifiable by occupation    | 42.07   | (41.22 to 42.93) | 41.07 | (35.48 to 47.54) | 14.58 | (13.19 to 16.12) | 110.06 | (103.28 to 117.29) |
| Non-employed                              | 4.81    | (4.75 to 4.88)   | 3.39  | (3.29 to 3.50)   | 3.45  | (3.34 to 3.56)   | 4.48   | (4.32 to 4.65)     |

2 CI; confidence interval, OR; odds ratio

3 <sup>a</sup> We adjusted for age (five year categories) and year in the overall model. We adjusted for only age (five year categories) in other models.



1 Table 1. Odds ratios for all-cause mortality in each occupation, Japan, 1970-2005 (cont.)

| 1985  |                  | 1990  |                  | 1995  |                  | 2000  |                  | 2005  |                  |
|-------|------------------|-------|------------------|-------|------------------|-------|------------------|-------|------------------|
| OR    | (95% CI)         |
| 1.14  | (1.10 to 1.17)   | 1.25  | (1.21 to 1.28)   | 1.35  | (1.32 to 1.39)   | 2.83  | (2.75 to 2.90)   | 2.50  | (2.43 to 2.57)   |
| 1.01  | (0.98 to 1.04)   | 1.04  | (1.01 to 1.07)   | 1.08  | (1.05 to 1.11)   | 2.26  | (2.19 to 2.34)   | 2.50  | (2.41 to 2.60)   |
| 1.25  | (1.22 to 1.28)   | 1.40  | (1.37 to 1.44)   | 1.34  | (1.31 to 1.38)   | 1.42  | (1.37 to 1.46)   | 1.07  | (1.03 to 1.11)   |
| 1.38  | (1.35 to 1.41)   | 1.26  | (1.23 to 1.29)   | 1.15  | (1.12 to 1.18)   | 1.37  | (1.33 to 1.41)   | 1.27  | (1.23 to 1.31)   |
| 1.97  | (1.91 to 2.04)   | 2.64  | (2.56 to 2.72)   | 2.90  | (2.81 to 2.99)   | 3.93  | (3.81 to 4.06)   | 3.97  | (3.84 to 4.11)   |
| 1.05  | (0.99 to 1.11)   | 1.28  | (1.21 to 1.36)   | 1.21  | (1.15 to 1.29)   | 1.53  | (1.45 to 1.62)   | 1.77  | (1.68 to 1.87)   |
| 1.97  | (1.92 to 2.01)   | 2.21  | (2.16 to 2.27)   | 2.37  | (2.30 to 2.44)   | 3.32  | (3.21 to 3.43)   | 3.12  | (3.00 to 3.24)   |
| 1.20  | (1.17 to 1.24)   | 1.33  | (1.29 to 1.37)   | 1.43  | (1.39 to 1.48)   | 1.88  | (1.82 to 1.94)   | 1.92  | (1.85 to 2.00)   |
| 1.00  | Reference        |
| 49.01 | (47.39 to 50.69) | 34.66 | (33.64 to 35.72) | 54.18 | (52.82 to 55.58) | 52.73 | (51.40 to 54.08) | 9.13  | (8.80 to 9.48)   |
| 6.94  | (6.82 to 7.06)   | 8.15  | (8.01 to 8.30)   | 8.59  | (8.44 to 8.74)   | 11.16 | (10.93 to 11.39) | 14.21 | (13.90 to 14.52) |
| 1.82  | (1.71 to 1.93)   | 1.85  | (1.74 to 1.96)   | 2.02  | (1.89 to 2.15)   | 2.83  | (2.65 to 3.01)   | 2.63  | (2.45 to 2.82)   |
| 3.68  | (3.37 to 4.02)   | 5.16  | (4.77 to 5.58)   | 6.08  | (5.60 to 6.61)   | 10.16 | (9.31 to 11.09)  | 12.21 | (11.07 to 13.47) |
| 1.26  | (1.20 to 1.33)   | 1.17  | (1.11 to 1.23)   | 1.32  | (1.25 to 1.40)   | 1.31  | (1.23 to 1.39)   | 1.26  | (1.17 to 1.35)   |
| 2.03  | (1.93 to 2.13)   | 1.89  | (1.80 to 1.98)   | 1.94  | (1.83 to 2.05)   | 2.20  | (2.06 to 2.34)   | 2.32  | (2.16 to 2.50)   |
| 1.67  | (1.58 to 1.76)   | 1.86  | (1.77 to 1.95)   | 2.21  | (2.09 to 2.33)   | 2.42  | (2.28 to 2.57)   | 2.49  | (2.33 to 2.67)   |
| 19.51 | (16.24 to 23.43) | 17.07 | (14.34 to 20.33) | 13.22 | (10.88 to 16.05) | 12.49 | (10.34 to 15.09) | 16.25 | (13.65 to 19.34) |
| 2.08  | (1.98 to 2.18)   | 2.10  | (2.00 to 2.20)   | 2.63  | (2.47 to 2.79)   | 3.15  | (2.93 to 3.39)   | 3.42  | (3.14 to 3.73)   |
| 7.52  | (6.73 to 8.40)   | 9.54  | (8.59 to 10.61)  | 8.17  | (7.20 to 9.28)   | 9.65  | (8.45 to 11.01)  | 11.54 | (10.06 to 13.24) |
| 1.00  | Reference        |
| 48.48 | (45.76 to 51.37) | 51.39 | (48.69 to 54.24) | 90.68 | (86.15 to 95.46) | 80.79 | (76.53 to 85.29) | 14.45 | (13.33 to 15.67) |
| 4.38  | (4.23 to 4.54)   | 4.46  | (4.30 to 4.62)   | 6.29  | (6.04 to 6.55)   | 7.91  | (7.55 to 8.29)   | 9.62  | (9.10 to 10.16)  |

2

33

1 Table 2. Adjusted prefecture-level variance for all-cause mortality, Japan, 1970-2005 <sup>a</sup>

|                   | Men                       |                  |                          | Women                     |                  |                          |
|-------------------|---------------------------|------------------|--------------------------|---------------------------|------------------|--------------------------|
|                   | Variance (on logit scale) |                  |                          | Variance (on logit scale) |                  |                          |
|                   | Estimate                  | (95% CI)         | Range of OR <sup>b</sup> | Estimate                  | (95% CI)         | Range of OR <sup>b</sup> |
| Overall           | 0.003                     | (0.001 to 0.004) | 0.87 to 1.13             | 0.005                     | (0.003 to 0.007) | 0.84 to 1.11             |
| 1970 <sup>c</sup> | 0.003                     | (0.002 to 0.005) | 0.89 to 1.12             | 0.007                     | (0.004 to 0.010) | 0.79 to 1.14             |
| 1975              | 0.003                     | (0.001 to 0.004) | 0.88 to 1.09             | 0.007                     | (0.004 to 0.010) | 0.82 to 1.19             |
| 1980              | 0.004                     | (0.002 to 0.005) | 0.82 to 1.11             | 0.005                     | (0.003 to 0.008) | 0.85 to 1.15             |
| 1985              | 0.003                     | (0.001 to 0.004) | 0.85 to 1.09             | 0.005                     | (0.002 to 0.007) | 0.86 to 1.13             |
| 1990              | 0.003                     | (0.002 to 0.004) | 0.89 to 1.11             | 0.004                     | (0.002 to 0.006) | 0.88 to 1.10             |
| 1995              | 0.006                     | (0.003 to 0.009) | 0.85 to 1.22             | 0.008                     | (0.004 to 0.012) | 0.80 to 1.15             |
| 2000              | 0.007                     | (0.004 to 0.010) | 0.84 to 1.25             | 0.010                     | (0.005 to 0.015) | 0.76 to 1.15             |
| 2005              | 0.011                     | (0.007 to 0.016) | 0.81 to 1.27             | 0.012                     | (0.007 to 0.017) | 0.75 to 1.18             |

2 CI; confidence interval, OR; odds ratio

3 <sup>a</sup> We adjusted for age (five year categories) and occupations. We further adjusted for year in the overall model.

4 <sup>b</sup> The range of adjusted odds ratios for mortality in each prefecture is shown. The reference is the grand mean of all the prefectures.

5 <sup>c</sup> The variance between 46 prefectures is shown because the data for Okinawa prefecture were not available in 1970.

**What is already known on this subject:**

A recent review article discussed the impact of individuals' socioeconomic position on health in Japan with regard to educational attainment, occupational gradient/class, income level, and unemployment.

Taken together, the results of these studies show that the patterns of health inequalities in Japan are not necessarily the same in terms of size, pattern, distribution, magnitude, and impact compared to Western countries.

While Japan enjoys the highest average life expectancy in the world, less has been documented on the trends and patterns of health inequalities within the nation.

**What this study adds:**

This is the first study that simultaneously examines time trends in premature mortality by occupational class as well as geographic locality, and the results of our study indicate that health disparities have widened during the decades following the collapse of the asset bubble in the early 1990s.

Given the multiple challenges that threaten to further dampen economic activity of the nation, it is imperative to continue to monitor future trends in health inequalities in order to avert the potential impacts on Japan's health security.

.....Page Break.....

## Responses to Reviewers' Comments

Dear Professor Goldblatt,

Thank you very much for your thoughtful review and positive evaluation of our article. We revised our manuscript according to your helpful suggestions.

- 1. This paper is welcome in bringing together information on occupation and prefecture of residence from death registration at working ages across a 35 year period for the whole of Japan. Trend data presented on the change in occupational distribution and in patterns of mortality over this period are extremely valuable, as is the analysis of the inter-relationship between occupation, prefecture and social factors. However the findings are difficult to interpret and there are some key questions about the methods used and definitions which are not clear from the paper. These issues are explained in more detail below. Greater clarity about these issues is required before publishing what are on the face of it some extraordinary findings.**

*Response:*

Thank you very much for your positive evaluation of our article. We thoroughly revised the manuscript following your helpful suggestions. We hope that the revision provides the findings more clearly.

- 2. Methods and definitions: The social information in this study appears to derive from a comparison of major occupational groups as recorded at death and compared with Census denominators. There are two issues here. First occupational classifications, on their own do not equate to social classifications. To arrive at a social classification from an occupational classification requires two further steps. Firstly, identifying the status in employment of the individual - do they manage or supervise others in the occupational group. Secondly, the occupation and status combination needs to be graded according to the predominant type of employment contract for that combination (e.g. salaried, weekly wage, etc.). It does not appear that this has been carried out for the data used in the article. Clarification of this is essential - is this purely an occupation mortality analysis or is it an analysis according to social position?**

*Response:*

Thank you for your thoughtful comment. One of the aims of this study was to examine the social inequality of all-cause mortality in Japan, and we intended to use occupations as an indicator of socioeconomic position. Generally, previous studies have used occupations, income, education, or

1  
2  
3  
4  
5  
6  
7  
8  
9  
10  
11  
12  
13  
14  
15  
16  
17  
18  
19  
20  
21  
22  
23  
24  
25  
26  
27  
28  
29  
30  
31  
32  
33  
34  
35  
36  
37  
38  
39  
40  
41  
42  
43  
44  
45  
46  
47  
48  
49  
50  
51  
52  
53  
54  
55  
56  
57  
58  
59  
60

wealth as indicators of socioeconomic position, and we understand that there is no single best indicator. Unfortunately, neither the status in employment nor the predominant type of employment contract was available in the present data set, and we briefly mentioned this as a limitation in the DISCUSSION section of the original version. In accordance with your suggestion, we changed “social inequality” to “occupational inequality” throughout the main text when appropriate. Furthermore, we modified sentences in the INTRODUCTION and DISCUSSION section as follows:

(Page 6, lines 6-9)

In this study, by using occupations as an indicator of socioeconomic position,<sup>14</sup> we examine the trends in occupational and geographic inequalities of all-cause premature adult mortality from 1970 through 2005.

(Page 19, lines 9-13)

First, although we were able to conduct a fairly detailed analysis of trends by occupational class, neither the status in employment nor the predominant type of employment contract was available, and in particular, we lacked information on whether the individuals were in standard jobs or precarious jobs.

**The second issue concerns the method of data collection. Is there any potential for numerator denominator bias between the two sources of information (census and death)? Specifically, what questions are asked on the two occasions and who are the respondents on the two occasions? In most cross-sectional occupational studies, discrepancies in either or both of these respects lead to numerator denominator bias. The extent of this is not clear from the paper. Nor is it clear from the paper whether any studies have been carried out in Japan to quantify any biases (either longitudinal follow up of census or retrospective in-depth surveys based on death records). Specific issues are whether, by the time a person dies they are either no longer in the occupation recorded for them at Census or whether the person recording the death either promotes the deceased to a higher status job or demotes them because they did not know the details of their job). As a simple example, it is not uncommon for those in lower status jobs to be selected out of the workforce due to ill health and be recorded as not employed or not classified at death, depending on the question asked at death.**

*Response:*

Thank you for your helpful comment. We agree that the potential for numerator denominator bias is an important issue. In the notification of deaths, the respondents are asked to fill in the occupation of decedent at the time of death, and one of the following persons are obliged to submit the notification: (1) relatives who live together with decedents, (2) other housemates, (3) landlord, estate owner,

1  
2  
3  
4 land/house agent, or (4) relatives who do not live together with decedents. In the questionnaire for  
5 the Census, the occupation was assessed by asking a following question: “Description of work –  
6 Describe in detail the duties you are assigned to perform.” The questionnaires are delivered to each  
7 household, and someone of each household answers the question. In accordance with your comment,  
8 we added sentences as follows:  
9  
10

11  
12  
13 (Page 6, line 18 – page 7, line 4)

14 In the notification of deaths, the respondents are asked to fill in the occupation of decedent at the  
15 time of death,<sup>17</sup> and one of the following persons is obliged to submit the notification: (1)  
16 relatives who live together with decedents, (2) other housemates, (3) landlord, estate owner,  
17 land/house agent, or (4) relatives who do not live together with decedents.  
18  
19  
20  
21

22 (Page 8, lines 6-9)

23 In the questionnaire for the Census, the occupation was assessed by asking a following question:  
24 “Description of work – Describe in detail the duties you are assigned to perform”.<sup>19</sup> The  
25 questionnaires are delivered to each household, and someone in each household answers the  
26 question.  
27  
28  
29  
30

31 We are not aware of any studies from Japan that have quantified the numerator denominator bias. We  
32 also agree that the possibility of measurement error of occupation at the time of death cannot be  
33 ruled out. In accordance with your comment, we added sentences to mention this as a limitation of  
34 the present study as follows:  
35  
36  
37  
38

39 (Page 20, lines 6-12)

40 Third, considering the possible discrepancies of the respondents on the two occasions (i.e., the  
41 notification of deaths and the census), we should note the potential for numerator denominator  
42 bias between the two sources of information. In particular, the possibility of measurement error  
43 in occupation at the time of death cannot be ruled out – the person recording the notification of  
44 deaths may either promotes the deceased to a higher status job or demotes them because the  
45 respondents did not know the details of the deceased’s job.  
46  
47  
48  
49  
50

51 **3. Mortality levels: The odds ratios shown in Table 1 are startling. A four-fold difference in**  
52 **mortality for men classified to an occupation and a 16-fold difference for women.**  
53 **Furthermore, most of the substantial differences recorded are in the opposite direction to**  
54 **those seen in longitudinal data in the West. If true, this would imply a catastrophic loss of**  
55 **life in higher status social groups in Japan. However, although the paper looks at several**  
56 **possible explanations (stress, lifestyles, behaviours) it does not identify any biologically**  
57 **plausible explanation for this phenomenon. In terms of previous knowledge, is there a**  
58  
59  
60

1  
2  
3  
4 **major threat to job security among the best-off in Japanese society? Do they suffer from**  
5 **effort-reward imbalance or a lack of control in their lives or jobs? No evidence or plausible**  
6 **hypothesis is proposed in the paper.**  
7  
8

9  
10 *Response:*

11 We agree that the present findings may well imply a catastrophic loss of life in higher status social  
12 groups in Japan. We thoroughly reviewed previous studies from Japan using nationally representative  
13 samples. As we explain in the main text, however, the pattern of health inequality in the present  
14 analysis is not consistent with previous findings of occupational class differences in health behaviors  
15 or psychosocial stress. Although we agree that biologically plausible explanations could strengthen  
16 our discussion, we refrained from making specific biologic explanations given our overall outcome  
17 (i.e., all-cause mortality). We hope that our discussion reflects properly the present findings.  
18  
19  
20  
21  
22

23  
24 **4. Geographic differences: The paper identifies some significant differences in mortality**  
25 **across Japan, with some interesting time trends. However, it does not present clear social**  
26 **and other correlations to help explain these patterns and trends. Part of the difficulty may**  
27 **be that, as the paper suggests, the prefectures are so large that they subsume as much**  
28 **within area social and mortality variation as exists between prefectures. If so, the observed**  
29 **patterns may simply be an illustration of the well-known ecological fallacy. A second**  
30 **problem may be that the paper, as noted above, has not identified a biologically plausible**  
31 **explanation for overall social inequalities in mortality. Without this modelling of the**  
32 **interaction between social factors, geography and mortality may be over-ambitious.**  
33  
34  
35  
36  
37

38  
39 *Response:*

40 We fully agree that the prefectures could be so large to explore geographic inequalities. As we  
41 explain in the main text, however, the prefecture may be a useful and valid unit of analysis since it is  
42 the unit that has direct administrative authority in the economic, education, and health sectors.  
43 Furthermore, the prefecture has specific jurisdiction over health centers, which is the locus of  
44 preventive health care activity in Japan. We also note that the boundaries between prefectures have  
45 not changed since 1867, enabling long-term analysis. In addition, as we explain in the supplementary  
46 text, a previous review article suggested that the studies in income inequality are more supportive in  
47 larger areas. As you indicated, the potential ecological fallacy could be generally a critical issue in  
48 ecological studies. As we explain in the main text, however, the unit of analysis of the present study  
49 was “cell” (tabulated by sex, age, occupation, year, and prefecture), and we used proportion of  
50 mortality in each cell as an outcome variable. By so doing, the present study examined the  
51 population-level association between occupation and mortality and how it varies across prefectures.  
52 In other words, we have no ecological X and Y and only individual X and Y. Therefore, we think that  
53 the observed patterns are not an illustration of the ecological fallacy.  
54  
55  
56  
57  
58  
59  
60

1  
2  
3 Dear Dr. Strand,  
4

5  
6 Thank you very much for your thoughtful review and positive evaluation of our article. We revised  
7 our manuscript according to your helpful suggestions.  
8  
9

- 10  
11 **1. This is an interesting and well written piece of work extending the existing literature on**  
12 **social inequality mortality trends to also cover Japan. Previous studies on this topic have**  
13 **mainly focused on Western populations. This work is of importance to researchers and**  
14 **policymakers and might be well suited for a general medical journal like BMJ. Research**  
15 **questions are clearly defined. Furthermore, the design of the study is appropriate and by**  
16 **using multilevel methods they ensure to properly adjust for micro- macrolevel bias, as the**  
17 **author Subramanian earlier have described in his paper with Duncan and Jones**  
18 **(Environment and Planning A 2001, volume 33, pages 399-417). Nevertheless, I still miss**  
19 **some basic numbers; for example age adjusted mortality rates by occupational class by**  
20 **year and gender. Such numbers are modeled in Figure 1 and 2, but I suspect the linear**  
21 **trends might be too simplistic, and would like to get an idea of the background numbers**  
22 **before they are run through complicated models. I believe some readers of BMJ will find**  
23 **such multilevel models rather complicated. Data is census based and covers the whole of**  
24 **Japan so exclusion criteria are not highly relevant here. Participants are adequately**  
25 **described.**  
26  
27  
28  
29  
30  
31  
32  
33  
34  
35

36 *Response:*

37 Thank you very much for your positive evaluation of our article. We also appreciate your comment  
38 on our analytic methods to properly adjust for micro- and macro-level bias. We thoroughly revised  
39 the manuscript following your suggestions, and we created a new table showing the age-adjusted  
40 mortality rates by occupational class by year and gender (Supplementary Table 5). We hope that the  
41 revision provides the reader with better understanding of the findings.  
42  
43  
44  
45

- 46  
47 **2. The multilevel approach is a nice one as commented on above, but the choice of logit link**  
48 **function limits the results to the relative scale presented to the reader as odds ratios. The**  
49 **inequality literature has stressed the importance to also investigate absolute inequalities**  
50 **(see for example Oakes & Kaufman, Methods in social epidemiology, 2006). This is of**  
51 **special importance when looking at mortality trends as rates tend to decline over time and**  
52 **one can have the situation that all socioeconomic groups decrease their rate at similar pace,**  
53 **thus absolute differences are constant, but the relative rate will increase. Table 1 shows**  
54 **increasing ORs, but I suspect this fallacy just described could be the reason for this?**  
55 **Would it be possible to run the model using identity link and get RD?**  
56  
57  
58  
59  
60



1  
2  
3  
4  
5  
6  
7  
8  
9  
10  
11  
12  
13  
14  
15  
16  
17  
18  
19  
20  
21  
22  
23  
24  
25  
26  
27  
28  
29  
30  
31  
32  
33  
34  
35  
36  
37  
38  
39  
40  
41  
42  
43  
44  
45  
46  
47  
48  
49  
50  
51  
52  
53  
54  
55  
56  
57  
58  
59  
60

*Response:*

We fully agree with the importance of investigating absolute as well as relative inequalities. As indicated in your comment No. 7, our intention of showing Figures 1 and 2 was to visualize the absolute inequality across occupations. In accordance with your comment, we calculated the age-adjusted mortality rates by occupational class by year and gender (Supplementary Table 5), which we believe will help readers to understand the present findings from absolute as well as relative perspectives. Although we appreciate your suggestion to run the model using identity link function, we think that logit link function is more appropriate in the present analysis, considering that the outcome of interest is the proportion of mortality in each cell. In accordance with your comment, we added sentences as follows:

(Page 9, lines 1-6)

For the descriptive purpose, we first calculated age-adjusted mortality rates by occupational class by year and sex (Supplementary Table 5). We used the direct method, using the model population of 1985 as a reference.<sup>20</sup> The model population of 1985 is based on the Japanese population under census of 1985 and it is created on the basis of 1,000 persons as 1 unit, after adjusting radical increase or decrease such as baby boom.<sup>21</sup>

3. **I have a concern regarding the revision of the classification of occupations and comparability of the 11 groups over time. For example, in group 9 “Production process and related workers” mining workers were included until 1986, but not in the last revision. I suspect mining workers have high mortality rate which could result in group 9 getting higher mortality in the earlier periods. Could this and other changes in the classification affect the results? I especially think of the pattern seen in Figure 1, where some groups, among them group 9, have a rather steep mortality decline. The pattern in men is somewhat strange as lines cross, putting high mortality occupational groups in 1970 among the lowest in 2005 (Sales workers). In women the picture is more harmonized, with decline in mortality in all groups (fig 2). I wonder if this pattern is a true picture or if some data issues described above might have played a role? I wonder if a less fine grouping of occupations could tackle this potential problem of comparability of occupational groups over time? Figure 1 is based on a linear slope over time – are there in fact linear trends? In the case of group 9 in men I would suspect a drop when the 4th revision is used.**

*Response:*

We agree that mining workers are expected to have a high mortality rate. Indeed, in the fourth revision of the Japan Standard Occupational Classification (Supplementary Table 1), “Production process and related workers” includes mining workers. Please note that, as we cite in the main text, this point is clearly explained in the following website.

1  
2  
3  
4  
5 (Reference No. 18)

6 Ministry of Internal Affairs and Communications. Japan Standard Occupational Classification.  
7 <http://www.stat.go.jp/english/index/seido/shokgyou/index-co.htm>.  
8  
9

10  
11 To clarify this, we added a following sentence in accordance with your comment:  
12

13  
14 (Page 7, lines 13-14)

15 Note that the group “production process and related workers” includes mining workers.  
16  
17

18  
19 We also agree that the time trend of social inequalities among men could be surprising since lines  
20 cross (Figure 1), and we appreciate your suggestion of using a less fine grouping of occupations. As  
21 explained in the main text, however, our study used occupation (major group) of the Japan Standard  
22 Occupational Classification, which yields reasonably consistent occupational grouping throughout  
23 the study period. (As noted above, mining workers are consistently categorized as production process  
24 and related workers.) We are thus concerned that using a less fine grouping of occupations does not  
25 necessarily present a true picture of the trend of social inequalities. In line with this, Greenland and  
26 Rothman suggested that “some categories may be collapsed together when data are sparse, provided  
27 these combinations do not merge groups that are very disparate with respect to the phenomena under  
28 study” (Greenland S, Rothman KJ. Fundamentals of epidemiologic data analysis. In: Rothman KJ,  
29 Greenland S, Lash TL, editors. *Modern Epidemiology*. 3rd ed. Philadelphia, PA: Wolters Kluwer  
30 Health/Lippincott Williams & Wilkins, 2008:213-37). After considering your comment very carefully,  
31 we decided to use the current occupational grouping. We hope that you agree with this revision.  
32  
33  
34  
35  
36  
37  
38  
39

- 40  
41 **4. Occupational groups 10 and 11 are left out of some analyses without much rationale. Could**  
42 **this bias the results as some areas might have a larger % of these two groups? Especially**  
43 **group 10 “unclassifiable” has a remarkably high mortality. This group is small (less than**  
44 **1.52%) so possibly not a big problem to leave this group out, but unemployed is a very**  
45 **large group in women (40-50%).**  
46  
47  
48

49 *Response:*

50  
51 Thank you for clarifying this. In the whole analysis of the present study, we included occupational  
52 groups No. 10 (i.e., workers not classifiable by occupations) and No. 11 (i.e., non-employed). To  
53 enhance readability of Figures 1 and 2, however, we excluded them from these Figures. We  
54 apologize for the unclear explanation. In accordance with your comment, we added a sentence as  
55 follows:  
56  
57  
58

59 (Page 12, lines 7-8)  
60

1  
2  
3  
4 We excluded workers not classifiable by occupation and non-employed from these Figures to  
5 enhance readability although they were included in the analysis.  
6  
7

- 8  
9  
10 **5. Age group is restricted to 25-64 to exclude students and retired. I guess some students and**  
11 **retired are still included? To be more sure possibly an even narrower age group (30-60)**  
12 **could be used?**  
13

14  
15 *Response:*

16 We agree that some students and retired are still included in the study subjects. However, almost all  
17 the university students in Japan graduate from universities in their early 20s, and it is getting  
18 common to rehire staff of retirement age. Therefore, we believe that the current age restriction  
19 reasonably succeeded in excluding students and the retired. If they should be included in the study  
20 subjects, they are categorized as “non-employed”, and we deliberately avoided giving an  
21 interpretation to the result among them in the present article. Also, please note that a previous study  
22 from the US also chose age 65 as a cut-off point for premature mortality (Krieger N, Rehkopf DH,  
23 Chen JT, Waterman PD, Marcelli E, Kennedy M. The fall and rise of US inequities in premature  
24 mortality: 1960-2002. *PLoS Med* 2008;5:e46. doi:10.1371/journal.pmed.0050046). We hope that the  
25 current age restriction is appropriate to examine the premature adult mortality.  
26  
27  
28  
29  
30  
31  
32

- 33 **6. Minor: Make it clearer that numbers of deaths for each cell are recorded during 1 calendar**  
34 **year.**  
35  
36

37  
38 *Response:*

39 In accordance with your suggestion, we added a sentence as follows:  
40  
41

42 (Page 8, line 18 – page 9, line 1)

43 Note that the numbers of deaths for each cell are recorded during one fiscal year.  
44  
45  
46

- 47  
48 **7. Results answer the research question, but as earlier stressed, the results rely on relative**  
49 **inequalities (except from fig 1 and 2, where mean predicted mortality on logit scale is**  
50 **presented). Authors also have made a set of supplementary analyses accompanied of**  
51 **supplementary text, tables and figures. The amount of information is large and I am not**  
52 **sure if the supplementary analyses are needed in this paper – maybe they could be placed**  
53 **in a separate paper?**  
54  
55  
56

57  
58 *Response:*

59 Thank you for your positive evaluation of our article. In accordance with your comment, the revision  
60 provides age-adjusted mortality rates by occupations (Supplementary Table 5). Also, please note that

our analysis of geographic inequalities assessed the trend of absolute health inequalities quantitatively (Table 2). We believe that, with these modifications, readers can understand the present findings of health inequalities from absolute as well as relative perspectives. We understand that the amount of information provided in the supplementary materials may be large. In this study, we intended to assess the time trend of health inequality in Japan comprehensively (i.e., both socially and geographically). Although this information could be placed in a separate paper, we believe that the comprehensive report may well facilitate understanding of the present findings.

**8. As authors say the results contrast health inequalities across occupational groups described in other industrialized western European and North American countries. It also contrasts a previous study from Japan (Fukuda et al, ref no 25) using income, where absolute inequalities have narrowed since 1950s with a flattening out from 1995 to 2005 (or possibly increasing). Saying that this is consistent with findings in this paper seems odd.**

*Response:*

We think that you are probably mentioning an ecological study by Fukuda et al. (Fukuda Y, Nakao H, Yahata Y, Imai H. Are health inequalities increasing in Japan? The trends of 1955 to 2000. *Biosci Trends* 2007;1:38-42). Please note that this paper was cited as a reference No. 31 in the original version, and currently it is cited as a reference No. 35. As you indicated, they assessed the time trend of geographic health inequalities in Japan, by examining the association of life expectancy and age-adjusted mortality with per capita income of prefectures and municipalities. We cited their work here since their results are somewhat consistent with ours in the sense that they suggested geographic health inequalities appeared to increase from 1995 to 2000. In accordance with your suggestion, we modified the sentences as follows:

(Page 18, lines 7-13)

By applying the novel multilevel methods, the present study shows that geographic inequalities in premature mortality have also widened since 1995. In an ecological study, Fukuda et al.<sup>35</sup> assessed the time trend of geographic health inequality in Japan, by examining the association of life expectancy and age-adjusted mortality with per capita income of prefectures and municipalities. While excluding Okinawa prefecture from the analyses, they found a possible increase in geographic health inequalities from 1995 to 2000, following a decrease from 1955 to 1995.<sup>35</sup>

**9. References are up to date and relevant. Abstract, summary, key messages and what this paper adds reflect accurately what the paper says.**

*Response:*

1  
2  
3  
4 Thank you very much for your positive evaluation of our article.  
5

6  
7 We thank the reviewers again for their helpful comments, which we feel have improved our  
8 manuscript. We hope that with these modifications, our paper can now be accepted for publication.  
9

10  
11 Sincerely,  
12  
13  
14  
15  
16  
17  
18  
19  
20  
21  
22  
23  
24  
25  
26  
27  
28  
29  
30  
31  
32  
33  
34  
35  
36  
37  
38  
39  
40  
41  
42  
43  
44  
45  
46  
47  
48  
49  
50  
51  
52  
53  
54  
55  
56  
57  
58  
59  
60

For peer review only



**Social and geographic inequalities in premature adult mortality in Japan: an observational study from 1970 to 2005**

|                                                                                                                                                                                                   |                                                                                                                                                                                                                                                                                                                                                                                                                                                                                                                                                                                                         |
|---------------------------------------------------------------------------------------------------------------------------------------------------------------------------------------------------|---------------------------------------------------------------------------------------------------------------------------------------------------------------------------------------------------------------------------------------------------------------------------------------------------------------------------------------------------------------------------------------------------------------------------------------------------------------------------------------------------------------------------------------------------------------------------------------------------------|
| Journal:                                                                                                                                                                                          | <i>BMJ Open</i>                                                                                                                                                                                                                                                                                                                                                                                                                                                                                                                                                                                         |
| Manuscript ID:                                                                                                                                                                                    | bmjopen-2011-000425.R1                                                                                                                                                                                                                                                                                                                                                                                                                                                                                                                                                                                  |
| Article Type:                                                                                                                                                                                     | Research                                                                                                                                                                                                                                                                                                                                                                                                                                                                                                                                                                                                |
| Date Submitted by the Author:                                                                                                                                                                     | 12-Jan-2012                                                                                                                                                                                                                                                                                                                                                                                                                                                                                                                                                                                             |
| Complete List of Authors:                                                                                                                                                                         | Suzuki, Etsuji; Okayama University Graduate School of Medicine, Dentistry and Pharmaceutical Sciences, Department of Epidemiology<br>Kashima, Saori; Hiroshima University Graduate School of Biomedical Sciences, Department of Public Health and Health Policy; Okayama University Graduate School of Medicine, Dentistry and Pharmaceutical Sciences, Department of Epidemiology<br>Kawachi, Ichiro; Harvard School of Public Health, Department of Society, Human Development, and Health<br>Subramanian, S V; Harvard School of Public Health, Department of Society, Human Development, and Health |
| <b>Primary Subject Heading</b>:                                                                                                                                                                   | Epidemiology                                                                                                                                                                                                                                                                                                                                                                                                                                                                                                                                                                                            |
| Secondary Subject Heading:                                                                                                                                                                        | Public health, Occupational and environmental medicine, Sociology                                                                                                                                                                                                                                                                                                                                                                                                                                                                                                                                       |
| Keywords:                                                                                                                                                                                         | EPIDEMIOLOGY, PUBLIC HEALTH, SOCIAL MEDICINE                                                                                                                                                                                                                                                                                                                                                                                                                                                                                                                                                            |
| <p>Note: The following files were submitted by the author for peer review, but cannot be converted to PDF. You must view these files (e.g. movies) online.</p> <p>1970-2005_adj_animation.gif</p> |                                                                                                                                                                                                                                                                                                                                                                                                                                                                                                                                                                                                         |

SCHOLARONE™  
Manuscripts

1  
2  
3  
4  
5 1 **Social and geographic inequalities in premature adult mortality in Japan: an**  
6  
7  
8 2 **observational study from 1970 to 2005**  
9

10 3 Etsuji Suzuki, Saori Kashima, Ichiro Kawachi, S V Subramanian  
11  
12

13  
14  
15  
16 5 Department of Epidemiology, Okayama University Graduate School of Medicine,  
17  
18 6 Dentistry and Pharmaceutical Sciences, 2-5-1 Shikata-cho, Kita-ku, Okayama  
19  
20 7 700-8558, Japan  
21  
22  
23

24  
25 8 Etsuji Suzuki *assistant professor*, Saori Kashima  
26  
27

28 9 Department of Public Health and Health Policy, Hiroshima University Graduate  
29  
30 10 School of Biomedical Sciences, 1-2-3 Kasumi, Minami-ku, Hiroshima 734-8551,  
31  
32 11 Japan  
33  
34

35  
36  
37 12 Saori Kashima *assistant professor*  
38  
39

40 13 Department of Society, Human Development, and Health, Harvard School of Public  
41  
42 14 Health, 677 Huntington Avenue, Boston, MA 02115, USA  
43  
44

45 15 Ichiro Kawachi *professor of social epidemiology and chair*, S V Subramanian  
46  
47 16 *professor of population health and geography*  
48  
49

50  
51 17 Correspondence to:  
52  
53

54 18 E Suzuki etsuji-s@cc.okayama-u.ac.jp; S V Subramanian svsubram@hsph.harvard.edu  
55  
56  
57  
58  
59  
60

1  
2  
3  
4  
5 **Abstract**  
6

7  
8 **Objectives:** To examine trends in social and geographic inequalities in all-cause  
9  
10 premature adult mortality in Japan.  
11

12  
13 **Design:** **Observational study of the Vital Statistics and the Census data.**  
14

15  
16 **Setting:** **Japan.**  
17

18  
19 **Participants:** Entire population aged 25 or older and less than 65 in 1970, 1975, 1980,  
20  
21 1985, 1990, 1995, 2000, and 2005. The total number of decedents was 984,022 and  
22  
23 532,223 in men and women, respectively.  
24  
25

26  
27 **Main outcome measures:** For each sex, odds ratios (ORs) and 95% confidence  
28  
29 intervals (CIs) for mortality were estimated by using multilevel logistic regression  
30  
31 models with “cells” (cross-tabulated by age and occupation) at level 1, eight years at  
32  
33 level 2, and 47 prefectures at level 3. The prefecture-level variance was used as an  
34  
35 estimate of geographic inequalities of mortality.  
36  
37

38  
39 **Results:** Adjusting for age and time-trends, compared with production process and  
40  
41 related workers, ORs ranged from 0.97 (95% CI 0.96 to 0.98) among administrative  
42  
43 and managerial workers to 2.22 (2.19 to 2.24) among service workers in men. By  
44  
45 contrast, in women, the lowest odds for mortality was observed among production  
46  
47 process and related workers (reference) while the highest OR was 12.22 (11.40 to  
48  
49  
50  
51  
52  
53  
54  
55  
56  
57  
58  
59  
60



1  
2  
3  
4  
5 1 13.10) among security workers. The degree of occupational inequality increased in  
6  
7  
8 2 both sexes. Higher occupational groups did not experience reductions in mortality  
9  
10  
11 3 throughout the period and was overtaken by lower occupational groups in the early  
12  
13  
14 4 1990s, among men. Conditional on individual age and occupation, overall geographic  
15  
16  
17 5 inequality of mortality were relatively small in both sexes; the ORs ranged from 0.87  
18  
19  
20 6 (Okinawa) to 1.13 (Aomori) for men and from 0.84 (Kanagawa) to 1.11 (Kagoshima)  
21  
22  
23 7 for women, even though there is a suggestion of increasing inequalities across  
24  
25  
26 8 prefectures since 1995 in both sexes.

27  
28 9 **Conclusions:** The present findings demonstrate that both social and geographic  
29  
30  
31 10 inequalities in all-cause mortality have increased in Japan during the last three decades.  
32  
33

34  
35  
36  
37 12 **Article summary**

38  
39  
40 13 **Article focus:**

41  
42  
43 14 While Japan enjoys the highest average life expectancy in the world, less has been  
44  
45  
46 15 documented on the trends and patterns of health inequalities within the nation.

47  
48  
49 16 We examined trends in social and geographic inequalities in all-cause premature adult  
50  
51  
52 17 mortality from 1970 through 2005.

53  
54 18 **Key messages:**  
55  
56  
57  
58  
59  
60

1 This is the first study that simultaneously examines time trends in premature mortality  
2 by occupational class as well as geographic locality, and the results of our study  
3 indicate that health disparities have widened during the decades following the collapse  
4 of the asset bubble in the early 1990s.

5 Given the multiple challenges that threaten to further dampen economic activity of the  
6 nation, it is imperative to continue to monitor future trends in health inequalities in  
7 order to avert the potential impacts on Japan's health security.

8 **Strengths and limitations of this study:**

9 The data are census based and cover the whole of Japan from 1970 through 2005.

10 This study uses multilevel methods to properly adjust for micro- and macro-level bias  
11 simultaneously.

12 We lacked information on whether the individuals were in standard jobs or precarious  
13 jobs.

## 1 INTRODUCTION

2 The postwar Constitution (1946) of Japan made equality a primary objective of the  
3 health system, and by 1961, the country achieved universal and compulsory health  
4 insurance coverage.<sup>1</sup> Although Japanese longevity was well below that of most  
5 European countries in 1960, subsequent health gains enabled the country to overtake  
6 other nations to the point where Japan reached the top of the national life expectancy  
7 rankings by 1985.<sup>12</sup> During the period of rapid economic growth (mid-1960s to 1989),  
8 Japan's social and economic policies helped to create a broad middle class with secure  
9 (often life-long) employment and comparatively egalitarian growth in living standards  
10 across the income spectrum.<sup>13</sup> Following the collapse of the asset bubble in the early  
11 1990s, however, Japan's economy has been characterized by persistently low growth  
12 accompanied by a marked increase in the number of precarious workers (i.e.,  
13 non-standard jobs such as part-time and contingent workers), from 1 in 5 employees in  
14 the 1990s to 1 in 3 employees by 2005.<sup>4</sup> The period since the collapse of the asset  
15 bubble – now referred to as the “Lost Two Decades” – has been characterized by a  
16 widening of income disparities and the emergence of a new class of “working poor”  
17 hitherto unrecognized in Japanese society.<sup>5</sup> In retrospect, the post-War period of  
18 comparatively egalitarian economic growth appears to have lasted about forty years,

1 and today, Japan ranks closer to countries such as the United States and the UK in  
2 terms of indicators of relative poverty, such as poverty rate and poverty gap.<sup>6</sup>

3 While there are considerable studies documenting social and geographic  
4 inequalities in mortality in other industrialized countries,<sup>7-12</sup> we are not aware of a  
5 similar comprehensive assessment of the trends in health inequalities in Japan that may  
6 have accompanied the major macroeconomic changes.<sup>13</sup> In this study, by using  
7 occupations as an indicator of socioeconomic position,<sup>14</sup> we examine the trends in  
8 occupational and geographic inequalities of all-cause premature adult mortality from  
9 1970 through 2005. Since premature adult mortality focuses on death occurring at  
10 younger ages, they constitute a useful measure in public health as well as preventive  
11 medicine.<sup>15</sup>

## 13 **METHODS**

### 14 **Data**

15 Data on deaths were obtained from the *Report of Vital Statistics: Occupational and*  
16 *Industrial Aspects*,<sup>16</sup> which has been conducted by the Ministry of Health, Labour and  
17 Welfare every five years since 1970, coinciding with the years of the Population  
18 Census. The latest year for which data are available is 2005. In the notification of

1  
2  
3  
4  
5 1 deaths, the respondents are asked to fill in the occupation of decedent at the time of  
6  
7  
8 2 death,<sup>17</sup> and one of the following persons is obliged to submit the notification: (1)  
9  
10 3 relatives who live together with decedents, (2) other housemates, (3) landlord, estate  
11  
12 4 owner, land/house agent, or (4) relatives who do not live together with decedents. The  
13  
14 5 occupation at the time of death is recorded for each decedent following the Japan  
15  
16 6 Standard Occupational Classification.<sup>18</sup> During the follow-up period, the occupational  
17  
18 7 classification scheme underwent four revisions (Supplementary Table 1).<sup>18</sup> In this study,  
19  
20 8 we used the fourth revision of the Occupational Classification, which includes the  
21  
22 9 following 11 groups<sup>18</sup>: (1) specialist and technical workers, (2) administrative and  
23  
24 10 managerial workers, (3) clerical workers, (4) sales workers, (5) service workers, (6)  
25  
26 11 security workers, (7) agriculture, forestry and fishery workers, (8) transport and  
27  
28 12 communication workers, (9) production process and related workers, (10) workers not  
29  
30 13 classifiable by occupation, and (11) non-employed. (The full description of each  
31  
32 14 occupational group is available on-line in English.<sup>18</sup>) Note that the group “production  
33  
34 15 process and related workers” includes mining workers. Note also that the group  
35  
36 16 “non-employed” includes the unemployed as well as non-labor force (e.g.,  
37  
38 17 home-makers, students, and the retired). Although the Census distinguishes the  
39  
40 18 unemployed from home-makers, the vital records combine these categories as  
41  
42  
43  
44  
45  
46  
47  
48  
49  
50  
51  
52  
53  
54  
55  
56  
57  
58  
59  
60

1 “non-employed”.<sup>18</sup> We restricted the analysis to those who are aged 25 or older and  
2 less than 65 to exclude students as well as the retired. The total number of decedents  
3 was 984,022 and 532,223 in men and women, respectively (Supplementary Figure 1  
4 and Supplementary Table 2).

5 Denominator data for the calculation of mortality rates were obtained from the  
6 Population Census which has been conducted by the Ministry of Internal Affairs and  
7 Communications every five years since 1920.<sup>19</sup> In the questionnaire for the Census, the  
8 occupation was assessed by asking a following question<sup>19</sup>: “Description of work –  
9 Describe in detail the duties you are assigned to perform.” The questionnaires are  
10 delivered to each household, and someone in each household answers the question. We  
11 used “production process and related workers” as the referent category since they were  
12 the largest occupational category in a majority of the time periods (Supplementary  
13 Table 3).

#### 14 **Analysis**

15 The data had a three-level multilevel structure of 32,590 cells for men and 32,542 cells  
16 for women at level 1, nested within eight years at level 2, nested within 47 prefectures  
17 at level 3. The eight years comprised of 1970, 1975, 1980, 1985, 1990, 1995, 2000, and  
18 2005. Each year had a maximum 88 cells (eight age groups times 11 occupational

1  
2  
3  
4  
5 1 groups) (Supplementary Table 4). Note that the numbers of deaths for each cell are  
6  
7  
8 2 recorded during one fiscal year. For the descriptive purpose, we first calculated  
9  
10  
11 3 age-adjusted mortality rates by occupational class by year and sex (Supplementary  
12  
13  
14 4 Table 5). We used the direct method, using the model population of 1985 as a  
15  
16 5 reference.<sup>20</sup> The model population of 1985 is based on the Japanese population under  
17  
18  
19 6 census of 1985 and it is created on the basis of 1,000 persons as 1 unit, after adjusting  
20  
21  
22 7 radical increase or decrease such as baby boom.<sup>21</sup> We then employed multilevel  
23  
24  
25 8 statistical procedures because of their ability to model complex variance structures at  
26  
27  
28 9 multiple levels.<sup>22</sup> In the present analysis, they allow estimation of the relationship  
29  
30  
31 10 between mortality and occupation, conditional on individual age variation (“fixed  
32  
33  
34 11 parameters”) and year- and prefecture-level variations (“random parameters”). They  
35  
36  
37 12 also enable an estimation of the extent to which the relationship between mortality and  
38  
39  
40 13 occupation varies across years and prefectures (random parameters) and the degree to  
41  
42  
43 14 which prefecture-level socioeconomic status explains this variation (fixed parameters).  
44  
45  
46 15 The unit of analysis was “cells,” and our models were structurally identical to models  
47  
48  
49 16 with individuals at level 1.<sup>23</sup>

50  
51 17 The response variable, proportion of deaths in each cell, was modeled with  
52  
53  
54 18 allowances made for the varying denominator in each cell. The fixed and random  
55  
56  
57  
58  
59  
60

1 parameter estimates (along with their standard errors) for the multilevel binomial logit  
2 link model were calibrated using predictive/penalized quasi-likelihood procedures with  
3 second order Taylor series expansion, as implemented within the MLwiN 2.22.<sup>24</sup>  
4 Results are presented as odds ratios (ORs) and 95% confidence intervals (CIs). A *p*  
5 value of less than 0.05 (two-sided test) was considered statistically significant.

6 First, we conducted three-level analysis as an overall model, with cells at level  
7 1, years at level 2, and prefectures at level 3. The prefecture-level variance was used as  
8 an estimate of geographic inequalities of mortality. Prefectures were ranked by ORs  
9 having the whole country of Japan as reference (value = 1), and uncertainty was  
10 estimated by 95% CIs. Further, to examine the temporal patterns of occupational and  
11 geographic inequality of mortality across years, we also conducted two-level analysis,  
12 with cells at level 1 and prefectures at level 2 separately for each year.

13 Then, to explore the temporal change of occupational inequality, we ran a  
14 three-level multilevel model including a fixed cross-level interaction effect between  
15 the 11 occupations (at level 1) and year (at level 2). In this analysis, we modeled the  
16 year as a continuous variable, and we calculated mean predicted probabilities for  
17 mortality among those aged 25 to 29 (referent category).

18 To present the results of geographic inequality in all-cause mortality, we



1  
2  
3  
4  
5 1 created maps showing prefecture-level residuals by using the ArcGIS (ESRI Japan Inc.,  
6  
7  
8 2 version 9.3).  
9

## 10 3 11 12 13 4 **RESULTS**

### 14 15 16 5 **Social inequality of mortality**

17  
18  
19 6 Table 1 shows the results of social inequality of all-cause premature mortality in terms  
20  
21  
22 7 of occupation from overall model as well as year-specific models in multilevel  
23  
24  
25 8 analyses. Excluding workers not classifiable by occupation and non-employed, there  
26  
27  
28 9 were substantial health disparities by occupations in both sexes. Adjusting for age and  
29  
30  
31 10 time-trends in the overall model, compared with production process and related  
32  
33  
34 11 workers, ORs ranged from 0.97 (95% CI 0.96 to 0.98) among administrative and  
35  
36  
37 12 managerial workers to 2.22 (95% CI 2.19 to 2.24) among service workers in men.  
38  
39  
40 13 Among women, the lowest odds for mortality was observed among production process  
41  
42  
43 14 and related workers (reference) while the highest OR was 12.22 (95% CI 11.40 to  
44  
45  
46 15 13.10) among security workers.

47  
48  
49 16 The degree of occupational inequality increased in both sexes. Among men, in  
50  
51  
52 17 1970, the lowest OR was 0.54 (95% CI 0.53 to 0.56) among administrative and  
53  
54  
55 18 managerial workers while the highest OR was 1.34 (95% CI 1.32 to 1.37) among  
56  
57  
58  
59  
60

1  
2  
3  
4  
5 1 agriculture, forestry and fishery workers. In 2005, however, the lowest odds for  
6  
7  
8 2 mortality was observed among production process and related workers (reference)  
9  
10  
11 3 whereas the highest OR was 3.97 (95% CI 3.84 to 4.11) among service workers.  
12  
13  
14 4 Among women, the lowest odds for mortality was observed among production process  
15  
16  
17 5 and related workers (reference) throughout the follow-up period, and the highest ORs  
18  
19  
20 6 in 1970 and 2005 were 11.43 (95% CI 9.14 to 14.29) and 16.25 (95% CI 13.65 to  
21  
22  
23 7 19.34), respectively, among security workers.

24  
25 8 **The widening social inequalities can be more clearly seen in Figures 1 and 2,**  
26  
27  
28 9 **which** show the temporal pattern of these occupational inequalities across years. We  
29  
30  
31 10 excluded workers not classifiable by occupation and non-employed from these Figures  
32  
33  
34 11 to enhance readability although they were included in the analysis. Among men, the  
35  
36  
37 12 mortality risk among three occupations (specialist and technical workers,  
38  
39  
40 13 administrative and managerial workers, and service workers) remained unchanged,  
41  
42  
43 14 whereas those of other occupational groups declined more or less. Especially, in  
44  
45  
46 15 addition to the workers not classifiable by occupation, three occupations (clerical  
47  
48  
49 16 workers, sales workers, and product process and related workers) experienced a  
50  
51  
52 17 considerable decline in mortality risk between 1970 and 2005.

53  
54 18 By contrast, trends in mortality by occupational groups were more stable for  
55  
56  
57  
58  
59  
60

1 women. Most occupations experienced the comparable trajectories during the period  
2 although administrative and managerial workers experienced relatively small declines  
3 in mortality risk. Specialist and technical workers and service workers also  
4 experienced declines in mortality risk among women although they remained on a  
5 plateau among men.

### 6 **Geographic inequality of mortality**

7 Conditional on individual age and occupation, overall geographic inequality of  
8 mortality were relatively small across prefectures in both sexes, with slightly larger  
9 geographic inequality among women than men (Table 2). **Note that Tables 1 and 2 are**  
10 **based on the same multilevel models, showing the results of fixed and random parts,**  
11 **respectively.** Prefecture-specific ORs ranged from 0.87 (Okinawa prefecture) to 1.13  
12 (Aomori prefecture) for men and from 0.84 (Kanagawa prefecture) to 1.11 (Kagoshima  
13 prefecture) for women (Supplementary Tables 6 and 7). Figure 3 shows the results of  
14 geographic inequalities in mortality. We observed similar patterns in both sexes  
15 although they led to opposite results between the sexes in Akita and Fukui prefectures;  
16 in Akita, the mortality risk was higher in men whereas it was lower in women. In Fukui,  
17 however, the pattern was reversed.

18 Although overall geographic inequalities of mortality were relatively small,

1 they appear to have increased over time (Table 2). In men, although prefecture-level  
2 variance was less pronounced until 1990 (around 0.003 on logit scale), it began to  
3 increase since 1995 steadily to 0.011 in 2005. By contrast, in women the  
4 prefecture-level variance (on logit scale) was 0.007 in 1970s, and it declined to 0.004  
5 in 1990, and then increased up to 0.012 in 2005. The adjusted ORs and 95% CIs for  
6 mortality in each prefecture across years are shown in Supplementary Tables 6 and 7.  
7 In 1970, ORs ranged from 0.89 (Gifu prefecture) to 1.12 (Akita prefecture) for men  
8 and from 0.79 (Tokyo) to 1.14 (Kagoshima prefecture) for women. In 2005, the ranges  
9 were widened, and ORs ranged from 0.81 (Nara prefecture) to 1.27 (Aomori  
10 prefecture) for men and from 0.75 (Nara prefecture) to 1.18 (Kochi prefecture) for  
11 women. We show geographic and temporal variation in mortality, suggesting an  
12 increase in geographic inequalities across prefectures since 1995 in both sexes  
13 (Supplementary Figures 2 and 3 and Video).

#### 14 **Supplementary analyses**

15 We examined two additional issues to further explore the occupational and  
16 geographic inequalities in premature mortality; (i) the patterns of geographic  
17 inequalities in mortality by occupations, and (ii) the presence of contextual effects of  
18 prefecture-level socioeconomic status on mortality risk (Supplementary Text,

1  
2  
3  
4  
5 1 Supplementary Figures 4 and 5, Supplementary Tables 8 to 10).

6  
7  
8 2

9  
10  
11 3 **DISCUSSION**

12  
13  
14 4 **Summary of findings**

15  
16 5 The findings of the present study suggest that the economic trends during the past 35  
17  
18 6 years have been accompanied by a widening of health inequalities between  
19  
20 7 occupational classes as well as geographic areas of the country. The post-bubble  
21  
22 8 economy has been characterized by lackluster growth combined with a dramatic shift  
23  
24 9 in the work-force away from life-long employment towards more precarious  
25  
26 10 employment.<sup>4</sup> This economic restructuring has increased pressure on workers in  
27  
28 11 managerial and professional workers (primarily men) who are being squeezed to raise  
29  
30 12 their productivity. The changing pattern of health inequalities across occupational  
31  
32 13 groups is consistent with this interpretation, i.e., the stalled decline in premature  
33  
34 14 mortality among white collar workers relative to other occupational classes.

35  
36  
37  
38  
39  
40  
41  
42  
43  
44  
45 15 **Comparison with other studies**

46  
47  
48 16 The present findings suggest that the health effects of the changing economic  
49  
50 17 conditions depend on individual's socioeconomic circumstances. A previous study in  
51  
52  
53  
54 18 Japan demonstrated that, although self-rated health improved for both sexes throughout  
55  
56  
57  
58  
59  
60

1  
2  
3  
4  
5 1 the economic crisis of the 1990s, health disparities in relation to occupations widened,  
6  
7  
8 2 especially among men.<sup>25</sup> They also reported that middle-class male workers and female  
9  
10  
11 3 homemakers seemed to be particularly adversely affected by the crisis.<sup>25</sup> The present  
12  
13  
14 4 study, however, provides a different pattern of widening health disparities in both sexes.  
15  
16  
17 5 For men, absolute health status improvement was observed only among some lower  
18  
19  
20 6 occupational groups (e.g., production process and related workers, sales workers, and  
21  
22  
23 7 clerical workers), whereas higher occupational classes (e.g., specialist and technical  
24  
25  
26 8 workers and administrative and managerial workers) apparently obtained no benefit  
27  
28  
29 9 throughout the period. Indeed, although they were advantaged with regard to mortality  
30  
31  
32 10 risk in 1970s and 1980s, they were overtaken in the 1990s by those in lower  
33  
34  
35 11 occupational classes who benefited more during the same period. Of note, this  
36  
37  
38 12 “cross-over” almost coincided with the collapse of the economic bubble in the early  
39  
40  
41 13 1990s. We note at the same time that neither male service workers nor agricultural,  
42  
43  
44 14 forestry and fishery workers experienced improvements in premature mortality  
45  
46  
47 15 throughout the period.

48  
49 16 By contrast, for women, we observe that absolute health status improved  
50  
51  
52 17 roughly to the same extent across occupational groups, and that changes in ranking  
53  
54  
55 18 were less pronounced in women compared to men. We should note that relatively few  
56  
57  
58  
59  
60

1  
2  
3  
4  
5 1 women were represented in the three occupational groups with higher risk of mortality  
6  
7  
8 2 (i.e., administrative and managerial workers, security workers, and transport and  
9  
10  
11 3 communication workers). Even excluding these occupational groups, however, health  
12  
13 4 inequalities appeared to have increased in women. These findings may be explained by  
14  
15 5 differences between men and women according to the type of work and industrial  
16  
17 6 sector of employment. Men are more likely to be engaged in work in the private sector  
18  
19  
20 7 as well as in parts of the economy that are more vulnerable to economic downturns  
21  
22  
23 8 (such as finance and business services, manufacturing, construction).<sup>26</sup>  
24  
25  
26  
27

### 28 9 **Potential mechanisms of social inequalities in mortality**

29  
30  
31 10 The present findings provide a marked contrast to the evolution of health inequalities  
32  
33  
34 11 described in other industrialized countries. In industrialized western European and  
35  
36  
37 12 north American countries, health status typically follows a hierarchical pattern: i.e., the  
38  
39  
40 13 lower the socioeconomic position, the worse the health status.<sup>5 8 10 11</sup> We show that this  
41  
42  
43 14 “typical” pattern of health inequalities does not necessarily apply to Japan. In contrast  
44  
45  
46 15 to Western countries, previous studies in Japan have yielded inconsistent results with  
47  
48  
49 16 regard to the relationship between socioeconomic status and health outcomes, and  
50  
51  
52 17 lower non-manual or manual workers do not necessarily exhibit less healthy behaviors  
53  
54  
55 18 compared with those in higher occupational classes.<sup>27-32</sup> Nevertheless, a recent study of  
56  
57  
58  
59  
60

1 a nationally representative sample in 2001 showed that men in lower occupational  
2 classes, such as service work, transportation, and labor work, were significantly more  
3 likely to engage in health risk behaviors compared with professional workers.<sup>33</sup> They  
4 also showed that there is a cumulation of risky behaviors in lower female occupational  
5 classes.<sup>33</sup> Further, another cross-sectional study in Japan demonstrated that occupation  
6 was not significantly associated with psychological distress among men or women by  
7 using a nationally representative sample in 2007.<sup>34</sup> Thus, the pattern of health  
8 inequalities in the present analysis is not consistent with occupational class differences  
9 in health behaviors or psychosocial stress.

10 As a possible explanation for the present findings, we note that  
11 occupation-based socioeconomic position may reflect social networks,<sup>14</sup> which enables  
12 its members to access a wide variety of resources. In this respect, recent research from  
13 Japan has emphasized the evaluation of social capital as well as social networks in the  
14 workplace to explain variations in workers' health.<sup>35-37</sup> We thus hypothesized a  
15 posteriori that, following the collapse of the economic bubble, workers of higher  
16 occupational classes were more likely to experience a breakdown of social cohesion  
17 within companies, which could cancel out the potential positive benefits among them.  
18 We also note that there is a possibility that the "compositions" of each occupational



1 group went through a (substantial) change throughout the study period, which might  
2 have led to different patterns of occupational hazards, especially among lower  
3 occupational groups. In other words, there is a possibility that work environment have  
4 improved markedly among them throughout the study period, which now requires less  
5 labor load. Finally, a possibility of healthy worker effect cannot be ruled out among  
6 some lower occupational groups. This could be induced by the following two  
7 processes; (i) healthy people might have selectively entered these occupations, and (ii)  
8 unhealthy workers might have selectively exited these occupations. Further studies are  
9 warranted to examine these possible explanations of the present findings.<sup>38</sup>

10 It is worth mentioning that typical occupational hierarchy does not necessarily  
11 apply to the occupation (major group) of the Japan Standard Occupational  
12 Classification. Indeed, there is inherently more ambiguity in the ranking of occupations,  
13 compared with education and income.<sup>39</sup> In addition, as noted by Galobardes et al.,<sup>14</sup> the  
14 decrease in manual occupations with concomitant increase in low-level service  
15 occupations has altered the stratification that occupation generates in terms of  
16 socioeconomic position, and so classification such as manual and non-manual worker  
17 may lose some of their meaning in economies which include a large number of  
18 low-paid, non-manual service jobs. Importantly, the occupational classification in the

1 present study yields reasonably consistent occupational grouping throughout the study  
2 period, and each group has a reasonably large data. We therefore examined the time  
3 trend of social inequalities by using the finest occupational classification available in  
4 the Census. By using a fairly detailed occupational classification, it is likely that we  
5 could adjust for other omitted compositional variables (e.g., education), to the extent  
6 that the cross-tabulation of age and occupation correlate with them.

### 7 **Geographic and temporal variation in mortality**

8 By applying the novel multilevel methods, the present study shows that geographic  
9 inequalities in premature mortality have also widened since 1995. In an ecological  
10 study, Fukuda et al.<sup>40</sup> assessed the time trend of geographic health inequality in Japan,  
11 by examining the association of life expectancy and age-adjusted mortality with per  
12 capita income of prefectures and municipalities. While excluding Okinawa prefecture  
13 from the analyses, they found a possible increase in geographic health inequalities  
14 from 1995 to 2000, following a decrease from 1955 to 1995.<sup>40</sup> Note that the present  
15 study examined geographic inequalities, conditional on individual age and occupation.

16 **The present findings thus provide** suggestive evidence of “common ecologic effects”  
17 of place where people live,<sup>41</sup> **although we should note that the seemingly ecologic**  
18 **effects might be due to an omitted compositional effect (e.g., income).** Broadly

1 speaking, since 1995, higher mortality risk has been consistently observed in the  
2 northeastern region in the main island (Tohoku region) for both sexes. Overall, the  
3 economic conditions of the predominantly rural areas in the region may be  
4 characterized by population decline, population aging, and lower per capita income.<sup>19</sup>

5 <sup>42</sup> Notably, however, not all rural prefectures have undergone the same transition;  
6 indeed some rural prefectures (such as Nara and Okayama) had moved up through the  
7 ranks as having significantly lower mortality for both sexes in 2005. In the  
8 supplementary analysis, no clear associations were found with prefecture-level  
9 socioeconomic variables, and it remains unknown what contributed to these distinct  
10 patterns. These patterns deserve further attention in future studies.

### 11 **Limitations of the study**

12 There are some limitations of our analysis. First, although we were able to conduct a  
13 fairly detailed analysis of trends by using occupations to measure certain aspects of  
14 socioeconomic position, neither the status in employment nor the predominant type of  
15 employment contract was available, and in particular, we lacked information on  
16 whether the individuals were in standard jobs or precarious jobs. Given the  
17 conspicuous increase in the proportion of the labor force engaged in non-standard  
18 work,<sup>4</sup> as well as mounting evidence that precarious work is associated with worse

1 health,<sup>43</sup> future work needs to examine whether the changing character of the  
2 workforce in Japan is contributing to widening health inequalities. The use of more  
3 detailed indicators of socioeconomic position would provide further insight into the  
4 social inequalities of health. Indeed, greater attention to the theoretical as well as  
5 empirical aspects of measurement of socioeconomic position will likely enhance the  
6 rigor of research on occupational health inequalities, which would increase the  
7 possibility for meaningfully comparing results across studies.<sup>44</sup>

8 Second, occupation at the time of death was used in our numerator data,  
9 which may not necessarily reflect the individual's life-course socioeconomic  
10 position.<sup>44 45</sup> If unhealthy workers selectively exited some occupations, this would have  
11 led to an under-estimation of mortality in those sectors. The proportion of agricultural  
12 workers significantly decreased during the study period for both sexes, as well as that  
13 of administrative and managerial workers (for men). However, this may reflect real  
14 trends in the work-force.

15 Third, considering the possible discrepancies of the respondents on the two  
16 occasions (i.e., the notification of deaths and the census), we should note the potential  
17 for numerator denominator bias between the two sources of information. In particular,  
18 the possibility of measurement error in occupation at the time of death cannot be ruled

1 out – the person recording the notification of deaths may either promotes the deceased  
2 to a higher status job or demotes them because the respondents did not know the  
3 details of the deceased’s job. **Indeed, rapid changes in the occupational structure of  
4 Japan could give plausibility to the extremely large odds ratios resulting from the  
5 potential for numerator denominator bias.**

6 Fourth, the smallest geographic unit available was the prefecture (of which  
7 there are 47), and we could not explore geographic inequalities in finer detail. However,  
8 the prefecture may be a useful and valid unit of analysis since it is the unit that has  
9 direct administrative authority in the economic, education, and health sectors.<sup>1</sup>  
10 Furthermore, the prefecture has specific jurisdiction over health centers, which is the  
11 locus of preventive health care activity in Japan.<sup>1</sup> Note also that the boundaries  
12 between prefectures have not changed since the Meiji Restoration (1867), enabling  
13 long-term analysis.<sup>1</sup> Since previous studies demonstrated that the choice of geographic  
14 units as well as area-based measures is critical in the investigation of geographic  
15 inequalities,<sup>46 47</sup> these issues warrant further examination.

## 16 **Conclusions**

17 The present findings demonstrate that both social and geographic inequalities in  
18 premature adult mortality have increased during Japan’s “Lost Two Decades”

1 following the collapse of the asset bubble. As a nation, Japan must grapple with the  
2 triple demographic trends of declining fertility, population aging, and overall  
3 population decline. These trends threaten to further dampen economic activity,  
4 escalating the load on the social security system. In addition, Japan now faces multiple  
5 challenges in the wake of the earthquake and tsunami on March 11, 2011, and this may  
6 further place downward momentum on the nation's struggling economy. Given these  
7 momentous challenges, it is imperative to continue to monitor future trends in health  
8 inequalities in order to avert the potential impacts on Japan's health security.

## References

1. Hasegawa T. Japan: Historical and current dimensions of health and health equity. In: Evans T, Whitehead M, Diderichsen F, Bhuiya A, Wirth M, editors. *Challenging Inequities in Health: From Ethics to Action*. New York, NY: Oxford University Press, 2001:90-103.
2. Marmot MG, Davey Smith G. Why are the Japanese living longer? *BMJ* 1989;299:1547-51.
3. Bezruchka S, Namekata T, Siström MG. Interplay of politics and law to promote health: improving economic equality and health: the case of postwar Japan. *Am J Public Health* 2008;98:589-94.
4. Ministry of Internal Affairs and Communications. Labour Force Survey. <http://www.stat.go.jp/english/data/roudou/index.htm>.
5. Kagamimori S, Gaina A, Naser Moaddeli A. Socioeconomic status and health in the Japanese population. *Soc Sci Med* 2009;68:2152-60.
6. OECD. *OECD Factbook 2010: Economic, Environmental and Social Statistics*: OECD Publishing.
7. Friel S, Marmot MG. Action on the social determinants of health and health inequities goes global. *Annu Rev Public Health* 2011;32:225-36.

- 1  
2  
3  
4  
5 1 8. Braveman P, Egerter S, Williams DR. The social determinants of health: coming of  
6  
7  
8 2 age. *Annu Rev Public Health* 2011;32:381-98.  
9  
10  
11 3 9. Thomas B, Dorling D, Davey Smith G. Inequalities in premature mortality in  
12  
13 4 Britain: Observational study from 1921 to 2007. *BMJ* 2010;341:c3639.  
14  
15  
16 5 10. Mackenbach JP, Stirbu I, Roskam AJ, Schaap MM, Menvielle G, Leinsalu M, et al.  
17  
18 6 Socioeconomic inequalities in health in 22 European countries. *N Engl J Med*  
19  
20 7 2008;358:2468-81.  
21  
22  
23 8 11. Krieger N, Rehkopf DH, Chen JT, Waterman PD, Marcelli E, Kennedy M. The fall  
24  
25 9 and rise of US inequities in premature mortality: 1960-2002. *PLoS Med*  
26  
27 10 2008;5:e46. doi:10.1371/journal.pmed.0050046.  
28  
29  
30  
31 11 12. Davey Smith G, Krieger N. Tackling health inequities. *BMJ* 2008;337:a1526.  
32  
33  
34 12 13. Catalano R, Goldman-Mellor S, Saxton K, Margerison-Zilko C, Subbaraman M,  
35  
36 13 Lewinn K, et al. The health effects of economic decline. *Annu Rev Public Health*  
37  
38 14 2011;32:431-50.  
39  
40  
41 15 14. Galobardes B, Shaw M, Lawlor DA, Davey Smith G, Lynch J. Indicators of  
42  
43 16 socioeconomic position. In: Oakes JM, Kaufman JS, editors. *Methods in Social*  
44  
45 17 *Epidemiology*. San Francisco, CA: Jossey-Bass, 2006:47-85.  
46  
47  
48  
49  
50  
51 18 15. Rajaratnam JK, Marcus JR, Levin-Rector A, Chalupka AN, Wang H, Dwyer L, et  
52  
53  
54  
55  
56  
57  
58  
59  
60



- 1  
2  
3  
4  
5 1 al. Worldwide mortality in men and women aged 15-59 years from 1970 to 2010: a  
6  
7  
8 2 systematic analysis. *Lancet* 2010;375:1704-20.  
9  
10  
11 3 16. Ministry of Health, Labour and Welfare. Overview Report of Vital Statistics in FY  
12  
13 4 2005: Occupational and Industrial Aspects  
14  
15  
16 5 <http://www.mhlw.go.jp/english/database/db-hw/orvf/index.html>.  
17  
18  
19 6 17. Ministry of Health, Labour and Welfare. Outline of Vital Statistics in Japan.  
20  
21  
22 7 <http://www.mhlw.go.jp/english/database/db-hw/outline/index.html>.  
23  
24  
25 8 18. Ministry of Internal Affairs and Communications. Japan Standard Occupational  
26  
27  
28 9 Classification. <http://www.stat.go.jp/english/index/seido/shokgyou/index-co.htm>.  
29  
30  
31 10 19. Ministry of Internal Affairs and Communications. Population Census.  
32  
33  
34 11 <http://www.stat.go.jp/english/data/kokusei/index.htm>.  
35  
36  
37 12 20. Ministry of Health, Labour and Welfare. Vital Statistics.  
38  
39  
40 13 <http://www.mhlw.go.jp/toukei/list/81-1a.html> (in Japanese).  
41  
42  
43 14 21. Ministry of Health, Labour and Welfare. Handbook of Health and Welfare Statistics  
44  
45  
46 15 2010. <http://www.mhlw.go.jp/english/database/db-hh/>.  
47  
48  
49 16 22. Raudenbush SW, Bryk AS. *Hierarchical Linear Models: Applications and Data*  
50  
51  
52 17 *Analysis Methods*. 2nd ed. Thousand Oaks, CA: Sage Publications, 2002.  
53  
54  
55 18 23. Subramanian SV, Duncan C, Jones K. Multilevel perspectives on modeling census  
56  
57  
58  
59  
60

- 1 data. *Environ Plann A* 2001;33:399-417.
- 2 24. MLwiN Version 2.22 [program]: Centre for Multilevel Modelling, University of  
3 Bristol, 2010.
- 4 25. Kondo N, Subramanian SV, Kawachi I, Takeda Y, Yamagata Z. Economic recession  
5 and health inequalities in Japan: analysis with a national sample, 1986-2001. *J*  
6 *Epidemiol Community Health* 2008;62:869-75.
- 7 26. Riva M, Bambra C, Easton S, Curtis S. Hard times or good times? Inequalities in  
8 the health effects of economic change. *Int J Public Health* 2011;56:3-5.
- 9 27. Kagamimori S, Kitagawa T, Nasermoaddeli A, Wang H, Kanayama H, Sekine M,  
10 et al. Differences in mortality rates due to major specific causes between Japanese  
11 male occupational groups over a recent 30-year period. *Ind Health*  
12 2004;42:328-35.
- 13 28. Lahelma E, Lallukka T, Laaksonen M, Martikainen P, Rahkonen O, Chandola T, et  
14 al. Social class differences in health behaviours among employees from Britain,  
15 Finland and Japan: the influence of psychosocial factors. *Health Place*  
16 2010;16:61-70.
- 17 29. Fukuda Y, Nakamura K, Takano T. Socioeconomic pattern of smoking in Japan:  
18 income inequality and gender and age differences. *Ann Epidemiol* 2005;15:365-72.

- 1  
2  
3  
4  
5 1 30. Nishi N, Makino K, Fukuda H, Tatara K. Effects of socioeconomic indicators on  
6  
7  
8 2 coronary risk factors, self-rated health and psychological well-being among urban  
9  
10 3 Japanese civil servants. *Soc Sci Med* 2004;58:1159-70.  
11  
12  
13 4 31. Takao S, Kawakami N, Ohtsu T. Occupational class and physical activity among  
14  
15 5 Japanese employees. *Soc Sci Med* 2003;57:2281-9.  
16  
17  
18 6 32. Martikainen P, Ishizaki M, Marmot MG, Nakagawa H, Kagamimori S.  
19  
20 7 Socioeconomic differences in behavioural and biological risk factors: a comparison  
21  
22 8 of a Japanese and an English cohort of employed men. *Int J Epidemiol*  
23  
24 9 2001;30:833-8.  
25  
26  
27 10 33. Fukuda Y, Nakamura K, Takano T. Accumulation of health risk behaviours is  
28  
29 11 associated with lower socioeconomic status and women's urban residence: a  
30  
31 12 multilevel analysis in Japan. *BMC Public Health* 2005;5:53.  
32  
33 13 doi:10.1186/1471-2458-5-53.  
34  
35  
36 14 34. Inoue A, Kawakami N, Tsuchiya M, Sakurai K, Hashimoto H. Association of  
37  
38 15 occupation, employment contract, and company size with mental health in a  
39  
40 16 national representative sample of employees in Japan. *J Occup Health*  
41  
42 17 2010;52:227-40.  
43  
44  
45 18 35. Suzuki E, Takao S, Subramanian SV, Doi H, Kawachi I. Work-based social  
46  
47  
48  
49  
50  
51  
52  
53  
54  
55  
56  
57  
58  
59  
60

- 1  
2  
3  
4  
5 1 networks and health status among Japanese employees. *J Epidemiol Community*  
6  
7  
8 2 *Health* 2009;63:692-6.  
9  
10  
11 3 36. Suzuki E, Takao S, Subramanian SV, Komatsu H, Doi H, Kawachi I. Does low  
12  
13 4 workplace social capital have detrimental effect on workers' health? *Soc Sci Med*  
14  
15 5 2010;70:1367-72.  
16  
17  
18  
19 6 37. Suzuki E, Fujiwara T, Takao S, Subramanian SV, Yamamoto E, Kawachi I.  
20  
21 7 Multi-level, cross-sectional study of workplace social capital and smoking among  
22  
23 8 Japanese employees. *BMC Public Health* 2010;10:489.  
24  
25 9 doi:10.1186/1471-2458-10-489.  
26  
27  
28  
29  
30  
31 10 38. Suzuki E, Yamamoto E, Tsuda T. Identification of operating mediation and  
32  
33 11 mechanism in the sufficient-component cause framework. *Eur J Epidemiol*  
34  
35 12 2011;26:347-57.  
36  
37  
38  
39 13 39. Harper S, Lynch J. Measuring health inequalities. In: Oakes JM, Kaufman JS,  
40  
41 14 editors. *Methods in Social Epidemiology*. San Francisco, CA: Jossey-Bass,  
42  
43 15 2006:134-68.  
44  
45  
46  
47  
48 16 40. Fukuda Y, Nakao H, Yahata Y, Imai H. Are health inequalities increasing in Japan?  
49  
50 17 The trends of 1955 to 2000. *Biosci Trends* 2007;1:38-42.  
51  
52  
53  
54 18 41. Subramanian SV, Glymour MM, Kawachi I. Identifying causal ecologic effects on  
55  
56  
57  
58  
59  
60

- 1  
2  
3  
4  
5 1 health: A methodological assessment. In: Galea S, editor. *Macrosocial*  
6  
7  
8 2 *Determinants of Population Health*. New York, NY: Springer, 2007:301-31.  
9  
10  
11 3 42. Cabinet Office, Government of Japan. Prefectural Accounts.  
12  
13 4 [http://www.esri.cao.go.jp/jp/sna/sonota/kenmin/kenmin\\_top.html](http://www.esri.cao.go.jp/jp/sna/sonota/kenmin/kenmin_top.html) (in Japanese).  
14  
15  
16 5 43. Kim MH, Kim CY, Park JK, Kawachi I. Is precarious employment damaging to  
17  
18 6 self-rated health? Results of propensity score matching methods, using longitudinal  
19  
20 7 data in South Korea. *Soc Sci Med* 2008;67:1982-94.  
21  
22  
23 8 44. Krieger N. Workers are people too: Societal aspects of occupational health  
24  
25 9 disparities - an ecosocial perspective. *Am J Ind Med* 2010;53:104-15.  
26  
27  
28 10 45. Landsbergis PA. Assessing the contribution of working conditions to  
29  
30 11 socioeconomic disparities in health: a commentary. *Am J Ind Med* 2010;53:95-103.  
31  
32  
33 12 46. Krieger N, Chen JT, Waterman PD, Soobader MJ, Subramanian SV, Carson R.  
34  
35 13 Geocoding and monitoring of US socioeconomic inequalities in mortality and  
36  
37 14 cancer incidence: does the choice of area-based measure and geographic level  
38  
39 15 matter?: the Public Health Disparities Geocoding Project. *Am J Epidemiol*  
40  
41 16 2002;156:471-82.  
42  
43  
44  
45  
46  
47  
48  
49  
50  
51 17 47. Reijneveld SA, Verheij RA, de Bakker DH. The impact of area deprivation on  
52  
53 18 differences in health: does the choice of the geographical classification matter? *J*  
54  
55  
56  
57  
58  
59  
60

1  
2  
3  
4  
5 1 *Epidemiol Community Health* 2000;54:306-13.  
6  
7  
8 2  
9  
10  
11 3  
12  
13  
14 4  
15  
16  
17  
18  
19  
20  
21  
22  
23  
24  
25  
26  
27  
28  
29  
30  
31  
32  
33  
34  
35  
36  
37  
38  
39  
40  
41  
42  
43  
44  
45  
46  
47  
48  
49  
50  
51  
52  
53  
54  
55  
56  
57  
58  
59  
60

For peer review only

1  
2  
3  
4  
5 1 **Acknowledgements:** The authors thank Akiko Tokinobu for her assistance with data  
6  
7  
8 2 collection.

9  
10 3 **Contributors:** SVS and ES conceived the idea and design of the study. ES led the data  
11  
12 4 collection, data analysis, interpretation of the findings, and writing of the paper. SVS  
13  
14 5 supervised the study and contributed to the interpretation of findings and writing of the  
15  
16 6 manuscript. SK contributed to the data analysis, literature review, and writing of the  
17  
18 7 manuscript. IK contributed to the interpretation of the findings and writing of the  
19  
20 8 manuscript. All authors have read and approved the final version of the manuscript.  
21  
22  
23  
24  
25  
26  
27

28 9 **Funding:** A part of this research was supported by a Grant-in-Aid for Scientific  
29  
30 10 Research, Ministry of Education, Culture, Sports, Science and Technology (MEXT),  
31  
32 11 Japan. The funding source had no role in study design, data collection, data analysis,  
33  
34 12 data interpretation, the writing of the report, or the decision to submit for publication.  
35  
36  
37  
38  
39

40 13 **Competing interests:** All authors have completed the ICMJE uniform disclosure form  
41  
42 14 at [www.icmje.org/coi\\_disclosure.pdf](http://www.icmje.org/coi_disclosure.pdf) (available on request from the corresponding  
43  
44 15 authors) and declare: SVS is supported by a Robert Wood Johnson Investigator Award  
45  
46 16 in Health Policy Research and by a career development award from the National  
47  
48 17 Institutes of Health (NHLBI K25 HL081275); no financial relationships with any  
49  
50 18 organisations that might have an interest in the submitted work in the previous 3 years;  
51  
52  
53  
54  
55  
56  
57  
58  
59  
60

1 no other relationships or activities that could appear to have influenced the submitted  
2 work.

3 **Ethical approval:** Ethical approval was not required.

4 **Data sharing:** No additional data available.

5 **Licence for publication statement:** The Corresponding Author has the right to grant  
6 on behalf of all authors and does grant on behalf of all authors, an exclusive licence (or  
7 non-exclusive for government employees) on a worldwide basis to the BMJ Group and  
8 co-owners or contracting owning societies (where published by the BMJ Group on  
9 their behalf), and its Licensees to permit this article (if accepted) to be published in  
10 BMJ Open and any other BMJ Group products and to exploit all subsidiary rights, as  
11 set out in our licence.



1  
2  
3  
4  
5 **1 Figure legends**  
6

7  
8 **2 Figure 1. Predicted mortality by occupations in men, Japan, 1970-2005.**  
9

10 We show mean predicted probabilities for all-cause premature mortality by nine  
11 occupational groups among those aged 25 to 29 (referent category). We excluded  
12 workers not classifiable by occupation and non-employed from the Figure.  
13  
14  
15  
16  
17  
18  
19  
20  
21

22 **7 Figure 2. Predicted mortality by occupations in women, Japan, 1970-2005.**  
23

24 We show mean predicted probabilities for all-cause premature mortality by nine  
25 occupational groups among those aged 25 to 29 (referent category). We excluded  
26 workers not classifiable by occupation and non-employed from the Figure.  
27  
28  
29  
30  
31  
32  
33  
34  
35  
36

37 **12 Figure 3. Geographic inequality of all-cause premature mortality, Japan,**  
38  
39 **13 1970-2005.**  
40

41 We show the overall geographic inequality of all-cause mortality across 47 prefectures,  
42 conditional on individual age, occupation, and year. Prefecture-level residuals are  
43 described in odds ratios with the reference being the grand mean of all the prefectures.  
44  
45  
46  
47  
48  
49  
50  
51  
52  
53  
54  
55  
56  
57  
58  
59  
60

1  
2  
3  
4  
5 1 not statistically significant.  
6  
7  
8  
9  
10  
11  
12  
13  
14  
15  
16  
17  
18  
19  
20  
21  
22  
23  
24  
25  
26  
27  
28  
29  
30  
31  
32  
33  
34  
35  
36  
37  
38  
39  
40  
41  
42  
43  
44  
45  
46  
47  
48  
49  
50  
51  
52  
53  
54  
55  
56  
57  
58  
59  
60

For peer review only

1 Table 1. Odds ratios for all-cause premature mortality in each occupation, Japan, 1970-2005<sup>a</sup>

|                                           | Overall |                  | 1970  |                  | 1975  |                  | 1980   |                    |
|-------------------------------------------|---------|------------------|-------|------------------|-------|------------------|--------|--------------------|
|                                           | OR      | (95% CI)         | OR    | (95% CI)         | OR    | (95% CI)         | OR     | (95% CI)           |
| <i>Men</i>                                |         |                  |       |                  |       |                  |        |                    |
| Specialist and technical workers          | 1.31    | (1.30 to 1.33)   | 0.74  | (0.72 to 0.77)   | 0.80  | (0.77 to 0.82)   | 1.18   | (1.14 to 1.21)     |
| Administrative and managerial workers     | 0.97    | (0.96 to 0.98)   | 0.54  | (0.53 to 0.56)   | 0.66  | (0.64 to 0.68)   | 0.76   | (0.74 to 0.78)     |
| Clerical workers                          | 1.20    | (1.19 to 1.21)   | 1.05  | (1.03 to 1.08)   | 1.09  | (1.06 to 1.12)   | 1.18   | (1.15 to 1.21)     |
| Sales workers                             | 1.26    | (1.25 to 1.27)   | 1.25  | (1.23 to 1.28)   | 1.26  | (1.24 to 1.29)   | 1.38   | (1.35 to 1.41)     |
| Service workers                           | 2.22    | (2.19 to 2.24)   | 1.22  | (1.18 to 1.27)   | 1.20  | (1.16 to 1.25)   | 1.93   | (1.86 to 1.99)     |
| Security workers                          | 1.05    | (1.03 to 1.08)   | 0.67  | (0.63 to 0.72)   | 0.76  | (0.72 to 0.81)   | 0.94   | (0.88 to 1.00)     |
| Agriculture, forestry and fishery workers | 1.89    | (1.87 to 1.91)   | 1.34  | (1.32 to 1.37)   | 1.48  | (1.45 to 1.51)   | 1.74   | (1.71 to 1.78)     |
| Transport and communication workers       | 1.29    | (1.28 to 1.31)   | 1.06  | (1.02 to 1.09)   | 0.98  | (0.95 to 1.02)   | 1.17   | (1.13 to 1.21)     |
| Production process and related workers    | 1.00    | Reference        | 1.00  | Reference        | 1.00  | Reference        | 1.00   | Reference          |
| Workers not classifiable by occupation    | 29.61   | (29.28 to 29.94) | 41.44 | (37.93 to 45.28) | 59.25 | (56.07 to 62.61) | 115.11 | (110.66 to 119.75) |
| Non-employed                              | 7.78    | (7.73 to 7.82)   | 5.83  | (5.73 to 5.93)   | 6.18  | (6.07 to 6.28)   | 6.68   | (6.56 to 6.80)     |
| <i>Women</i>                              |         |                  |       |                  |       |                  |        |                    |
| Specialist and technical workers          | 1.85    | (1.81 to 1.89)   | 1.64  | (1.54 to 1.74)   | 1.54  | (1.44 to 1.63)   | 1.88   | (1.77 to 2.00)     |
| Administrative and managerial workers     | 4.91    | (4.76 to 5.06)   | 3.57  | (3.26 to 3.91)   | 3.54  | (3.23 to 3.87)   | 3.17   | (2.88 to 3.50)     |
| Clerical workers                          | 1.23    | (1.20 to 1.25)   | 1.63  | (1.55 to 1.72)   | 1.35  | (1.28 to 1.42)   | 1.45   | (1.38 to 1.53)     |
| Sales workers                             | 1.80    | (1.77 to 1.83)   | 1.35  | (1.29 to 1.41)   | 1.45  | (1.38 to 1.52)   | 1.87   | (1.78 to 1.97)     |
| Service workers                           | 1.65    | (1.62 to 1.68)   | 1.11  | (1.06 to 1.17)   | 1.04  | (0.99 to 1.10)   | 1.77   | (1.68 to 1.86)     |
| Security workers                          | 12.22   | (11.40 to 13.10) | 11.43 | (9.14 to 14.29)  | 9.24  | (7.30 to 11.69)  | 11.57  | (9.07 to 14.76)    |
| Agriculture, forestry and fishery workers | 2.25    | (2.22 to 2.29)   | 1.65  | (1.60 to 1.71)   | 1.88  | (1.80 to 1.95)   | 2.18   | (2.09 to 2.28)     |
| Transport and communication workers       | 6.88    | (6.59 to 7.18)   | 4.01  | (3.53 to 4.55)   | 3.89  | (3.42 to 4.43)   | 7.07   | (6.31 to 7.91)     |
| Production process and related workers    | 1.00    | Reference        | 1.00  | Reference        | 1.00  | Reference        | 1.00   | Reference          |
| Workers not classifiable by occupation    | 42.07   | (41.22 to 42.93) | 41.07 | (35.48 to 47.54) | 14.58 | (13.19 to 16.12) | 110.06 | (103.28 to 117.29) |
| Non-employed                              | 4.81    | (4.75 to 4.88)   | 3.39  | (3.29 to 3.50)   | 3.45  | (3.34 to 3.56)   | 4.48   | (4.32 to 4.65)     |

2 CI; confidence interval, OR; odds ratio

3 <sup>a</sup> We adjusted for age (five year categories) and year in the overall model. We adjusted for only age (five year categories) in other models.

1 Table 1. Odds ratios for all-cause premature mortality in each occupation, Japan, 1970-2005 (cont.)

|  | 1985  |                  | 1990  |                  | 1995  |                  | 2000  |                  | 2005  |                  |
|--|-------|------------------|-------|------------------|-------|------------------|-------|------------------|-------|------------------|
|  | OR    | (95% CI)         |
|  | 1.14  | (1.10 to 1.17)   | 1.25  | (1.21 to 1.28)   | 1.35  | (1.32 to 1.39)   | 2.83  | (2.75 to 2.90)   | 2.50  | (2.43 to 2.57)   |
|  | 1.01  | (0.98 to 1.04)   | 1.04  | (1.01 to 1.07)   | 1.08  | (1.05 to 1.11)   | 2.26  | (2.19 to 2.34)   | 2.50  | (2.41 to 2.60)   |
|  | 1.25  | (1.22 to 1.28)   | 1.40  | (1.37 to 1.44)   | 1.34  | (1.31 to 1.38)   | 1.42  | (1.37 to 1.46)   | 1.07  | (1.03 to 1.11)   |
|  | 1.38  | (1.35 to 1.41)   | 1.26  | (1.23 to 1.29)   | 1.15  | (1.12 to 1.18)   | 1.37  | (1.33 to 1.41)   | 1.27  | (1.23 to 1.31)   |
|  | 1.97  | (1.91 to 2.04)   | 2.64  | (2.56 to 2.72)   | 2.90  | (2.81 to 2.99)   | 3.93  | (3.81 to 4.06)   | 3.97  | (3.84 to 4.11)   |
|  | 1.05  | (0.99 to 1.11)   | 1.28  | (1.21 to 1.36)   | 1.21  | (1.15 to 1.29)   | 1.53  | (1.45 to 1.62)   | 1.77  | (1.68 to 1.87)   |
|  | 1.97  | (1.92 to 2.01)   | 2.21  | (2.16 to 2.27)   | 2.37  | (2.30 to 2.44)   | 3.32  | (3.21 to 3.43)   | 3.12  | (3.00 to 3.24)   |
|  | 1.20  | (1.17 to 1.24)   | 1.33  | (1.29 to 1.37)   | 1.43  | (1.39 to 1.48)   | 1.88  | (1.82 to 1.94)   | 1.92  | (1.85 to 2.00)   |
|  | 1.00  | Reference        |
|  | 49.01 | (47.39 to 50.69) | 34.66 | (33.64 to 35.72) | 54.18 | (52.82 to 55.58) | 52.73 | (51.40 to 54.08) | 9.13  | (8.80 to 9.48)   |
|  | 6.94  | (6.82 to 7.06)   | 8.15  | (8.01 to 8.30)   | 8.59  | (8.44 to 8.74)   | 11.16 | (10.93 to 11.39) | 14.21 | (13.90 to 14.52) |
|  | 1.82  | (1.71 to 1.93)   | 1.85  | (1.74 to 1.96)   | 2.02  | (1.89 to 2.15)   | 2.83  | (2.65 to 3.01)   | 2.63  | (2.45 to 2.82)   |
|  | 3.68  | (3.37 to 4.02)   | 5.16  | (4.77 to 5.58)   | 6.08  | (5.60 to 6.61)   | 10.16 | (9.31 to 11.09)  | 12.21 | (11.07 to 13.47) |
|  | 1.26  | (1.20 to 1.33)   | 1.17  | (1.11 to 1.23)   | 1.32  | (1.25 to 1.40)   | 1.31  | (1.23 to 1.39)   | 1.26  | (1.17 to 1.35)   |
|  | 2.03  | (1.93 to 2.13)   | 1.89  | (1.80 to 1.98)   | 1.94  | (1.83 to 2.05)   | 2.20  | (2.06 to 2.34)   | 2.32  | (2.16 to 2.50)   |
|  | 1.67  | (1.58 to 1.76)   | 1.86  | (1.77 to 1.95)   | 2.21  | (2.09 to 2.33)   | 2.42  | (2.28 to 2.57)   | 2.49  | (2.33 to 2.67)   |
|  | 19.51 | (16.24 to 23.43) | 17.07 | (14.34 to 20.33) | 13.22 | (10.88 to 16.05) | 12.49 | (10.34 to 15.09) | 16.25 | (13.65 to 19.34) |
|  | 2.08  | (1.98 to 2.18)   | 2.10  | (2.00 to 2.20)   | 2.63  | (2.47 to 2.79)   | 3.15  | (2.93 to 3.39)   | 3.42  | (3.14 to 3.73)   |
|  | 7.52  | (6.73 to 8.40)   | 9.54  | (8.59 to 10.61)  | 8.17  | (7.20 to 9.28)   | 9.65  | (8.45 to 11.01)  | 11.54 | (10.06 to 13.24) |
|  | 1.00  | Reference        |
|  | 48.48 | (45.76 to 51.37) | 51.39 | (48.69 to 54.24) | 90.68 | (86.15 to 95.46) | 80.79 | (76.53 to 85.29) | 14.45 | (13.33 to 15.67) |
|  | 4.38  | (4.23 to 4.54)   | 4.46  | (4.30 to 4.62)   | 6.29  | (6.04 to 6.55)   | 7.91  | (7.55 to 8.29)   | 9.62  | (9.10 to 10.16)  |

2

1 Table 2. Adjusted prefecture-level variance for all-cause premature mortality, Japan, 1970-2005 <sup>a</sup>

|                   | Men                       |                  |                          | Women                     |                  |                          |
|-------------------|---------------------------|------------------|--------------------------|---------------------------|------------------|--------------------------|
|                   | Variance (on logit scale) |                  |                          | Variance (on logit scale) |                  |                          |
|                   | Estimate                  | (95% CI)         | Range of OR <sup>b</sup> | Estimate                  | (95% CI)         | Range of OR <sup>b</sup> |
| Overall           | 0.003                     | (0.001 to 0.004) | 0.87 to 1.13             | 0.005                     | (0.003 to 0.007) | 0.84 to 1.11             |
| 1970 <sup>c</sup> | 0.003                     | (0.002 to 0.005) | 0.89 to 1.12             | 0.007                     | (0.004 to 0.010) | 0.79 to 1.14             |
| 1975              | 0.003                     | (0.001 to 0.004) | 0.88 to 1.09             | 0.007                     | (0.004 to 0.010) | 0.82 to 1.19             |
| 1980              | 0.004                     | (0.002 to 0.005) | 0.82 to 1.11             | 0.005                     | (0.003 to 0.008) | 0.85 to 1.15             |
| 1985              | 0.003                     | (0.001 to 0.004) | 0.85 to 1.09             | 0.005                     | (0.002 to 0.007) | 0.86 to 1.13             |
| 1990              | 0.003                     | (0.002 to 0.004) | 0.89 to 1.11             | 0.004                     | (0.002 to 0.006) | 0.88 to 1.10             |
| 1995              | 0.006                     | (0.003 to 0.009) | 0.85 to 1.22             | 0.008                     | (0.004 to 0.012) | 0.80 to 1.15             |
| 2000              | 0.007                     | (0.004 to 0.010) | 0.84 to 1.25             | 0.010                     | (0.005 to 0.015) | 0.76 to 1.15             |
| 2005              | 0.011                     | (0.007 to 0.016) | 0.81 to 1.27             | 0.012                     | (0.007 to 0.017) | 0.75 to 1.18             |

2 CI; confidence interval, OR; odds ratio

3 <sup>a</sup> We adjusted for age (five year categories) and occupations. We further adjusted for year in the overall model.

4 <sup>b</sup> The range of adjusted odds ratios for mortality in each prefecture is shown. The reference is the grand mean of all the prefectures.

5 <sup>c</sup> The variance between 46 prefectures is shown because the data for Okinawa prefecture were not available in 1970.

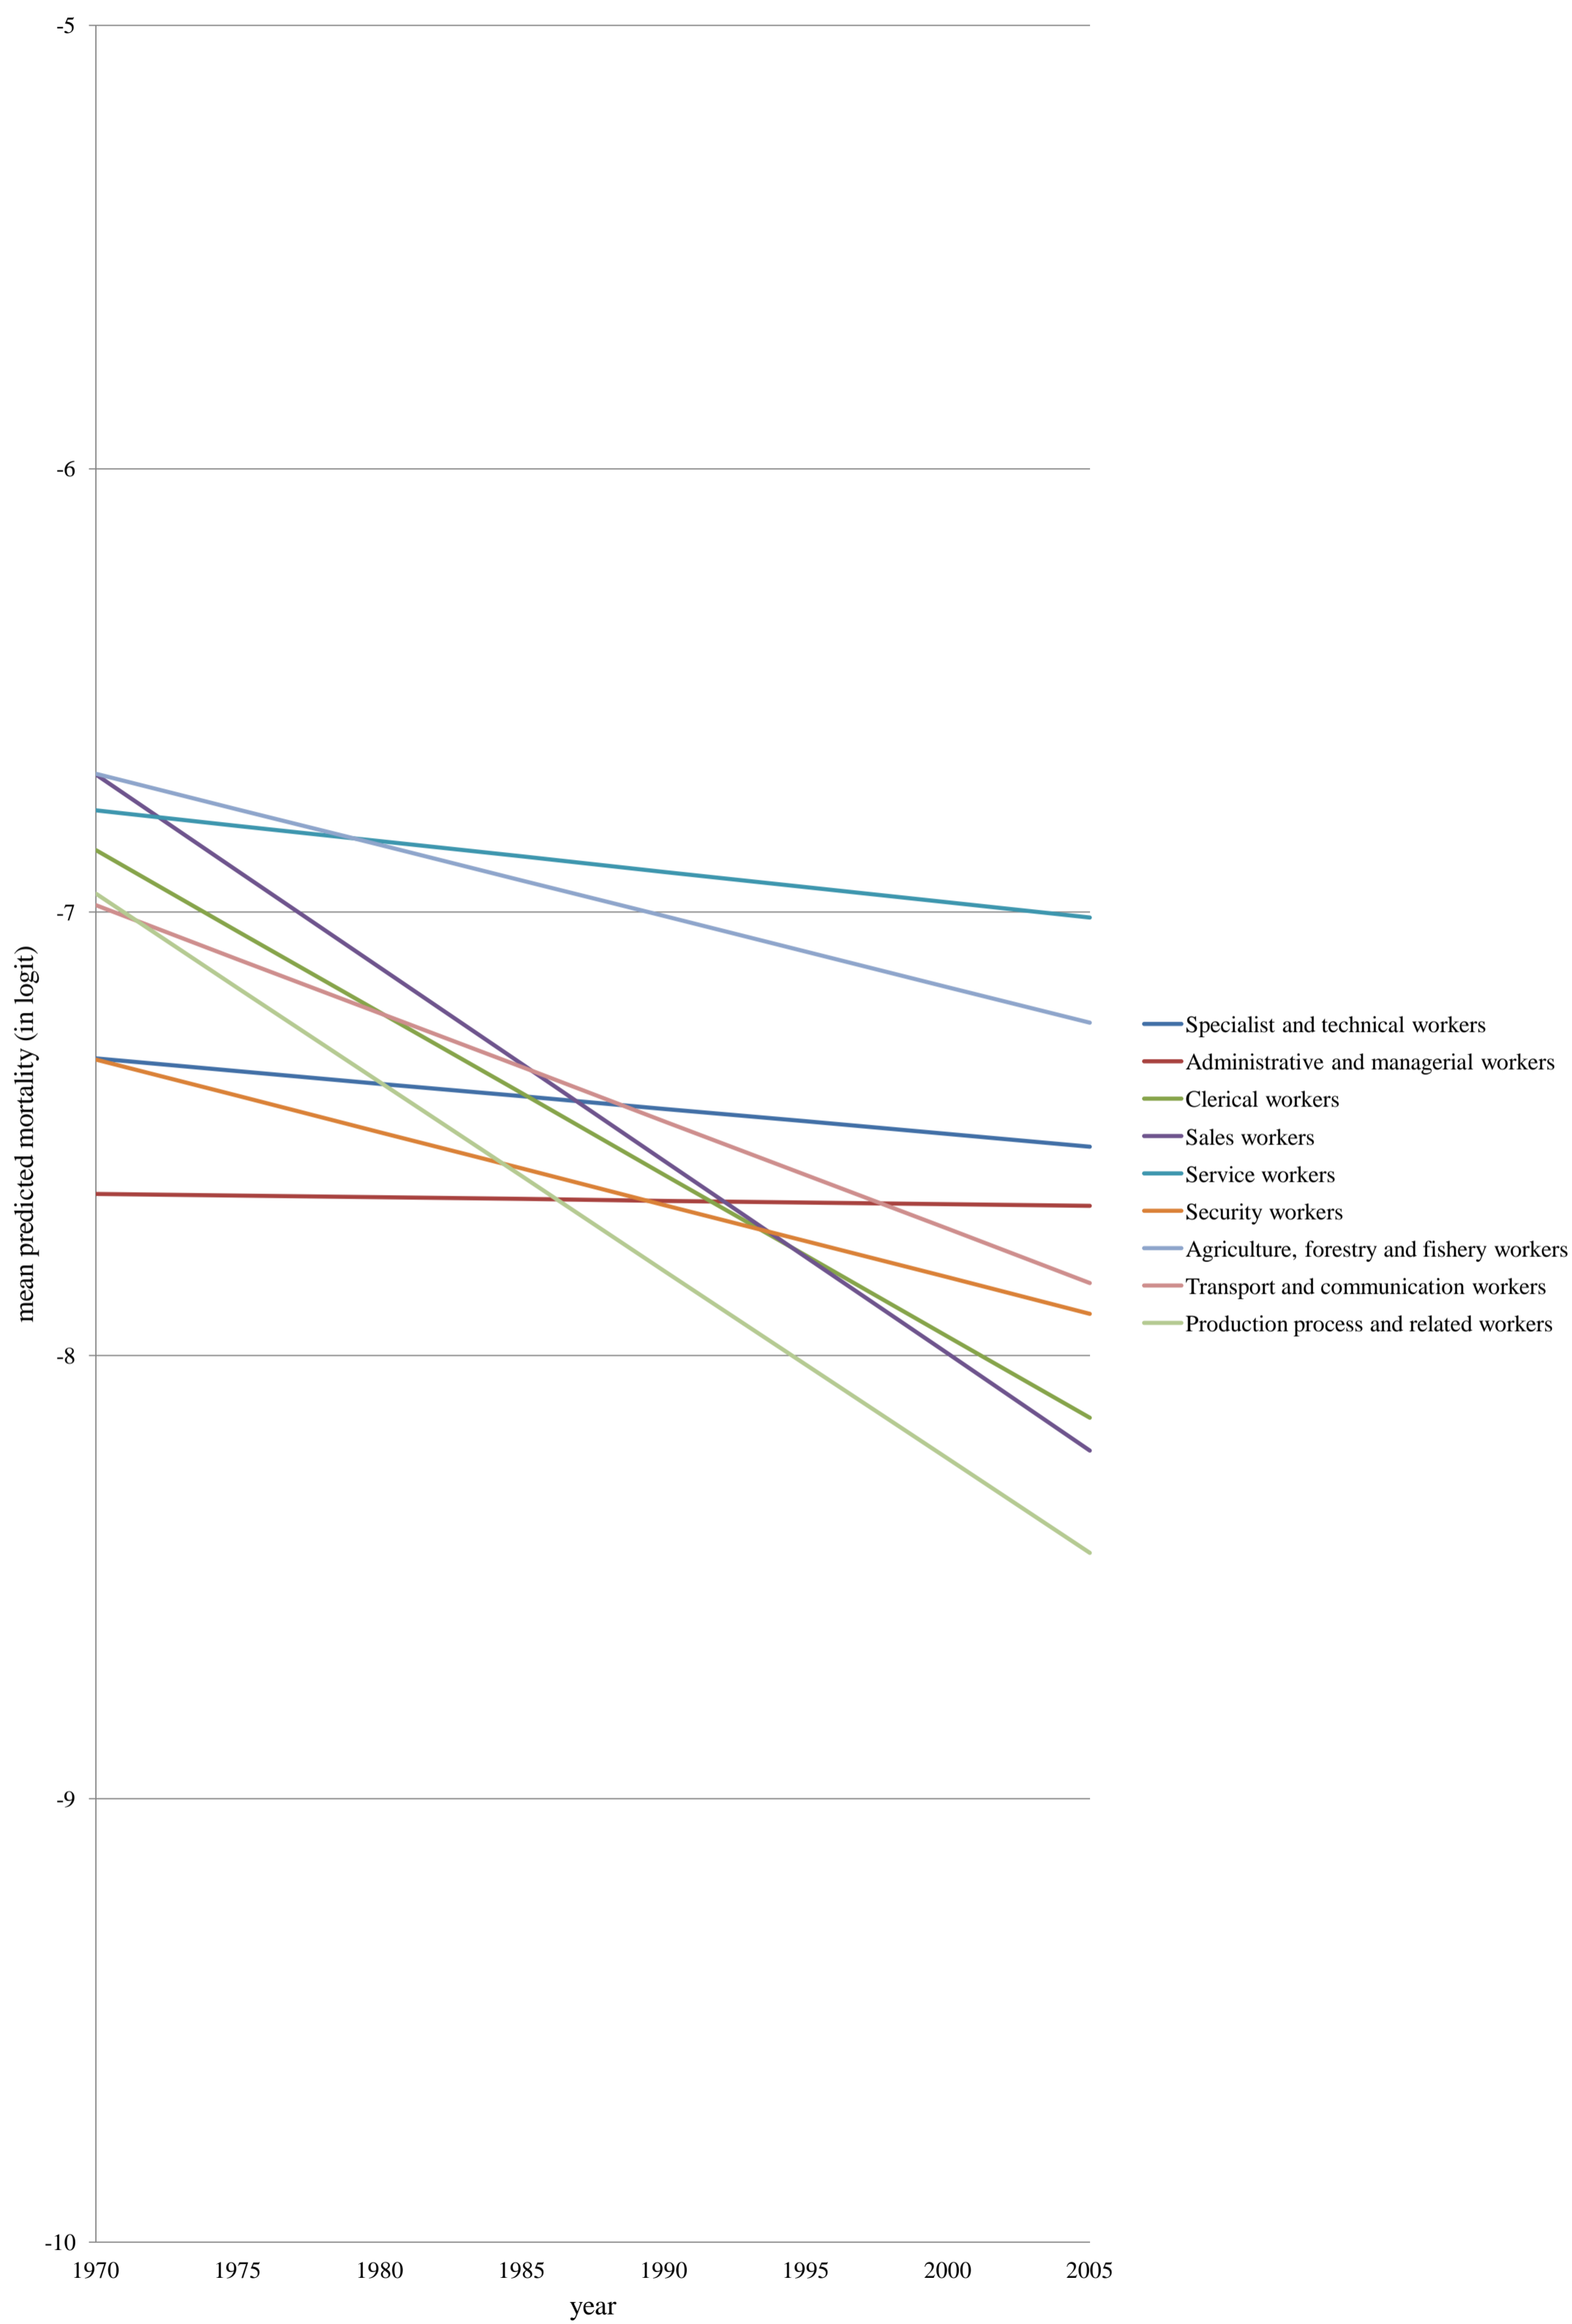

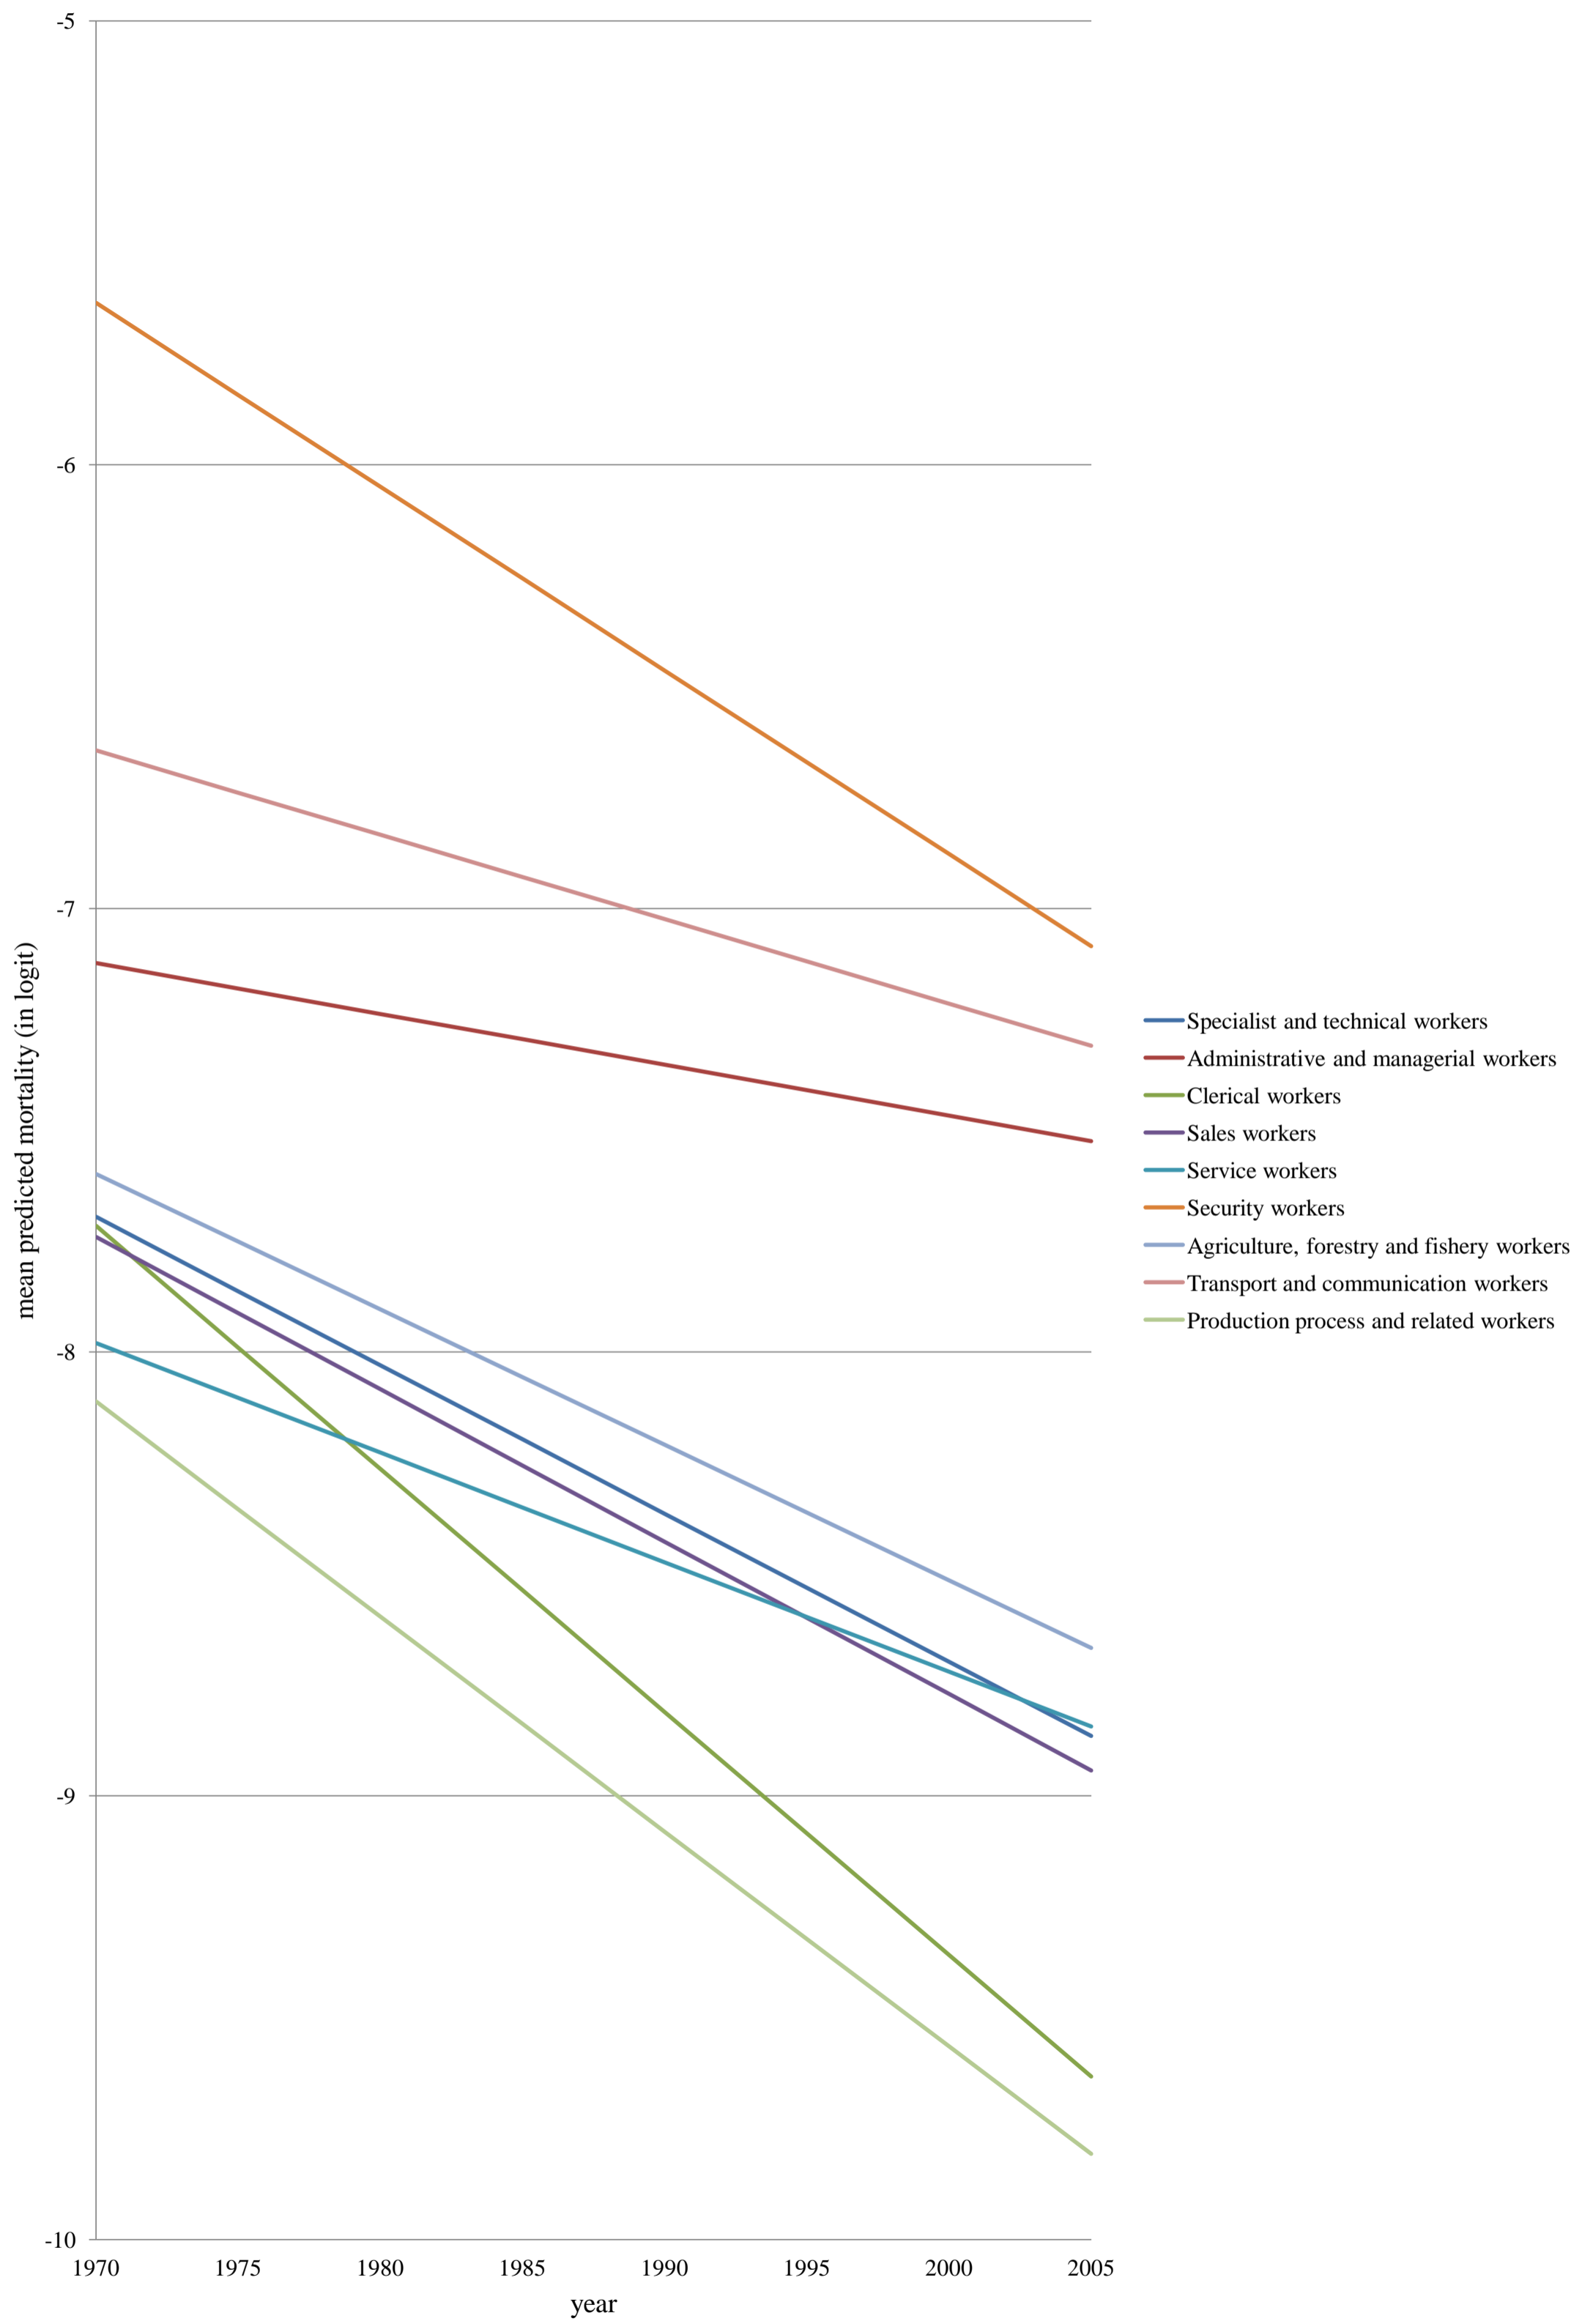



1  
2  
3  
4  
5  
6  
7  
8  
9  
10  
11  
12  
13  
14  
15  
16  
17  
18  
19  
20  
21  
22  
23  
24  
25  
26  
27  
28  
29  
30  
31  
32  
33  
34  
35  
36  
37  
38  
39  
40  
41  
42  
43

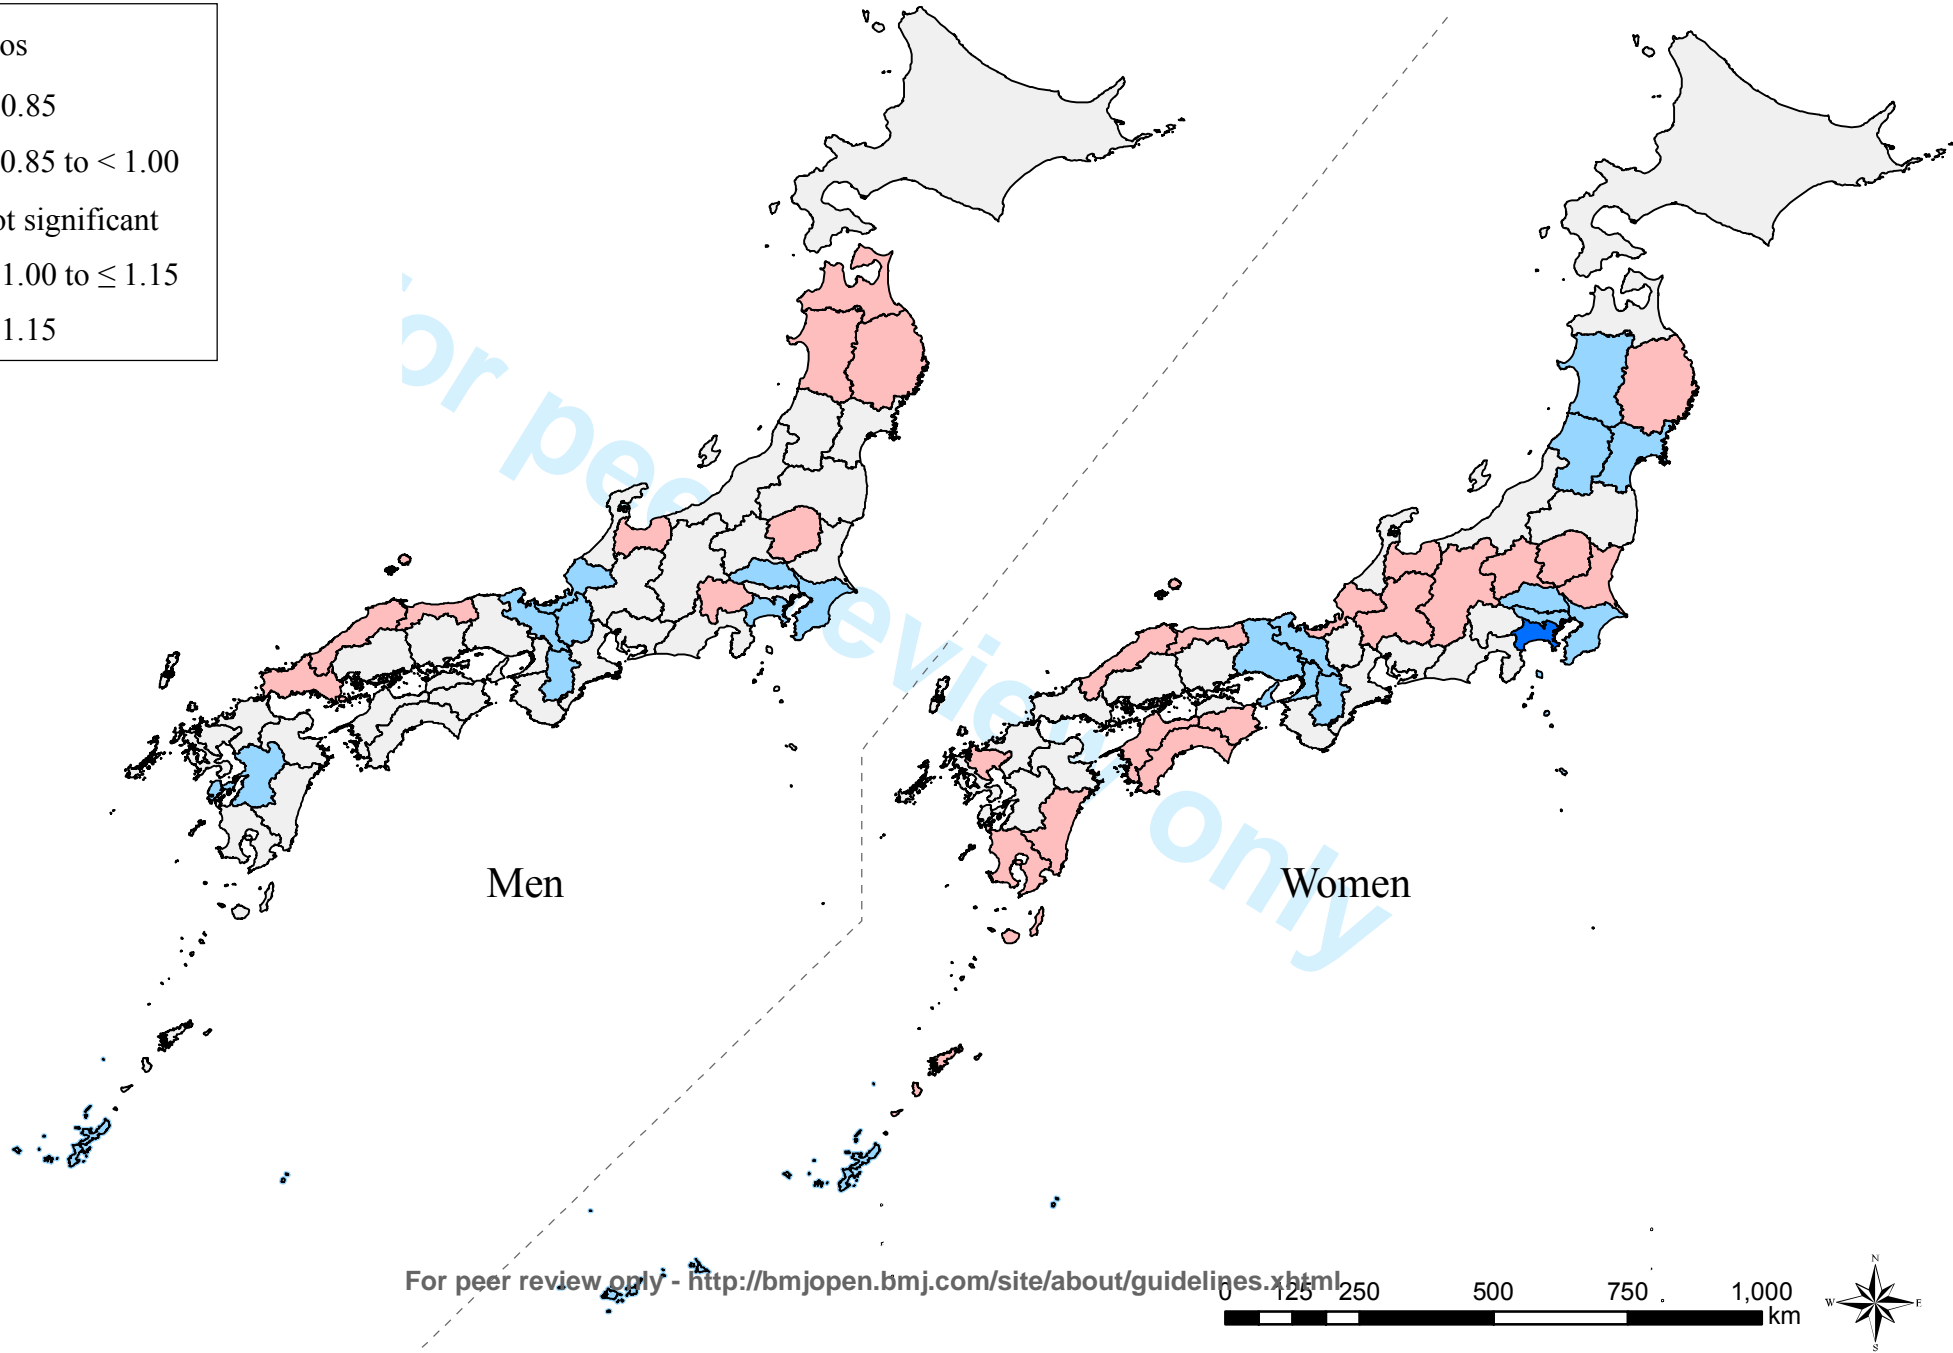



## Supplementary Text

### Overview of supplementary analyses

As supplementary analyses, we examined two additional issues to further explore the social and geographic inequalities in premature mortality; (i) the patterns of geographic inequalities in mortality by occupations, and (ii) the presence of contextual effects of prefecture-level socioeconomic status on mortality risk.

### Geographic inequalities in all-cause premature mortality by occupations

#### *Background and aims*

Although we examined the patterns of geographic inequalities in premature mortality for all occupations in the main analysis, the patterns may vary (substantially) according to occupations. Therefore, we examined the occupation-specific geographic inequality in premature mortality for the overall study period. This analysis may further facilitate understanding of the possible pathways of emerging geographic inequalities in Japan.

#### *Methods*

Following the previous report of the Population Census,<sup>1</sup> we summarized the 11 occupations into six groups to increase the statistical power as follows: I. clerical, technical and managerial occupations (i.e., (1) specialist and technical workers, (2) administrative and managerial workers, and (3) clerical workers), II. sales and service occupations (i.e., (4) sales workers, (5) service workers, and (6) security workers), III. agriculture, forestry and fishery occupations (i.e., (7) agriculture, forestry and fishery workers), IV. production and transport occupations (i.e., (8) transport and communication workers and (9) production process and related workers), V. unclassifiable occupations (i.e., (10) workers not classifiable by occupation), and VI. non-employed (i.e., (11) non-employed) (Supplementary Table 1).

In this supplementary analysis, we specified six prefecture-level error terms (at level 3) corresponding to the six occupational groups, conditional on individual age, 11 occupations, and years as fixed terms. We calculated the variance and covariance of these error terms, and we also derived their correlation coefficients to explore the possible differential geographic patterns of mortality by the six occupational groups. Finally, we created maps showing prefecture-level residuals in the same methods as the main analysis.

#### *Results*

We show the results of variance and covariance of prefecture-level residuals among the six occupational groups (Supplementary Table 8). Men and women revealed a similar pattern except for the covariance between sales and service occupations and non-employed (-0.003 and 0.005 in men and women, respectively) and the covariance between agriculture, forestry and fishery occupations

1  
2  
3  
4 and unclassifiable occupations (0.006 and -0.019 in men and women, respectively). In both sexes, the  
5 variances among unclassifiable occupations were much higher than those of other occupational groups  
6 (0.317 and 0.331 in men and women, respectively). Further, excluding unclassifiable occupations and  
7 non-employed, the signs of correlation coefficients were all positive, indicating that the patterns of  
8 geographic inequalities were similar across the remaining four occupational groups. We show these  
9 geographic patterns in both sexes (Supplementary Figures 4 and 5).  
10  
11  
12

## 13 **Contextual effect of prefecture-level socioeconomic status**

### 14 ***Background and aims***

15  
16  
17 Previous studies in Japan have examined possible contextual effects of area-level socioeconomic  
18 status (e.g., income inequality, per-capita income) on self-rated health and health-related behaviors by  
19 using multilevel analysis.<sup>2-4</sup> The relationship between area-level socioeconomic status and mortality  
20 has been also investigated in ecological studies,<sup>5-12</sup> most of which indicated higher mortality in areas  
21 of lower socioeconomic position. Indeed, recent international comparative studies have confirmed an  
22 association between income inequality and health, which included Japan.<sup>13-15</sup> However, no studies  
23 have examined the association between area-level socioeconomic status and premature adult mortality  
24 in Japan, by considering both individual- and area-level socioeconomic indicators. Further, we note  
25 the possibility that contextual effects by area-level disadvantage may have changed after the collapse  
26 of asset bubble in the early 1990s. Therefore, we examined the trends of contextual effects of  
27 prefecture-level socioeconomic status on premature adult mortality.  
28  
29  
30  
31  
32  
33  
34  
35

### 36 ***Methods***

37 We derived prefecture-level socioeconomic status variables from the *National Survey of Family*  
38 *Income and Expenditure*,<sup>16</sup> which has been implemented every five years since the first survey in 1959.  
39 We derived the following three variables for each prefecture and divided them into tertiles; Gini's  
40 coefficient of yearly income, average yearly income, and average savings (Supplementary Table 9).  
41 These variables were calculated among two-or-more-person households. Gini's coefficient of yearly  
42 income was available since 1979, and we imputed the values of 1979 forwardly to 1969 and 1974.  
43 Although household income and savings may follow the skewed distributions, median income or  
44 savings were not available throughout the study period. Note that a previous review article suggested  
45 that the studies in income inequality are more supportive in large areas, e.g., states, regions, and  
46 metropolitan areas, because in that context income inequality serves as a measure of the scale of  
47 social stratification.<sup>17</sup> As Shibuya et al.<sup>2</sup> noted, a prefecture is similar to a state in the United States in  
48 terms of its population size and variations in income inequality.  
49  
50  
51  
52  
53  
54  
55

56 We linked the data set of prefecture-level variables to the data set of the Population Census and the  
57 Vital Statistics one year out, e.g., National Survey of Family Income and Expenditure in 2004 was  
58 linked with the Population Census in 2005 and the Vital Statistics in 2005 fiscal year.  
59  
60

In the analysis, we conducted three-level analyses as an overall model, with cells at level 1, years

1  
2  
3  
4 at level 2, and prefectures at level 3. The prefecture-level socioeconomic status variable was entered  
5 into the model as a level-2 variable separately. Furthermore, to examine the joint effects of income  
6 inequality and average income/savings, we also entered Gini's coefficient and average yearly  
7 income/savings into the model simultaneously. In like manner, to examine the temporal patterns of  
8 contextual effects, we also conducted two-level analysis, with cells at level 1 and prefectures at level 2  
9 separately for each year.  
10  
11  
12

### 13 14 **Results**

15 Overall, we found little evidence of the association between prefecture-level socioeconomic status and  
16 the risk of mortality in both sexes, conditional on individual age and occupation (Supplementary Table  
17 10). Likewise, in year-specific analyses, no clear associations were found although lower average  
18 savings were associated with higher risk of mortality in some years. When we examined the joint  
19 effects of income inequality and average income/savings, no substantial differences were observed  
20 (data not shown).  
21  
22  
23  
24  
25

### 26 27 **Conclusions of supplementary analyses**

28 Excluding unclassifiable occupations and non-employed, the patterns of geographic inequalities were  
29 similar across occupational groups. We found no clear associations between prefecture-level  
30 socioeconomic status and premature mortality risk throughout the period although there is suggestion  
31 of inverse association between average savings and mortality in some years.  
32  
33  
34  
35

### 36 37 **References**

- 38 1. Ministry of Internal Affairs and Communications. Population Census: Explanation of Terms.  
39 <http://www.stat.go.jp/english/data/kokusei/2000/terms.htm#Occupation>.
- 40 2. Shibuya K, Hashimoto H, Yano E. Individual income, income distribution, and self rated health in  
41 Japan: cross sectional analysis of nationally representative sample. *BMJ* 2002;324:16-9.
- 42 3. Fukuda Y, Nakamura K, Takano T. Accumulation of health risk behaviours is associated with lower  
43 socioeconomic status and women's urban residence: a multilevel analysis in Japan. *BMC Public*  
44 *Health* 2005;5:53. doi:10.1186/1471-2458-5-53.
- 45 4. Ichida Y, Kondo K, Hirai H, Hanibuchi T, Yoshikawa G, Murata C. Social capital, income  
46 inequality and self-rated health in Chita peninsula, Japan: a multilevel analysis of older people in  
47 25 communities. *Soc Sci Med* 2009;69:489-99.
- 48 5. Fukuda Y, Nakao H, Yahata Y, Imai H. Are health inequalities increasing in Japan? The trends of  
49 1955 to 2000. *Biosci Trends* 2007;1:38-42.
- 50 6. Fukuda Y, Nakamura K, Takano T. Higher mortality in areas of lower socioeconomic position  
51 measured by a single index of deprivation in Japan. *Public Health* 2007;121:163-73.
- 52 7. Nakaya T, Dorling D. Geographical inequalities of mortality by income in two developed island  
53 countries: a cross-national comparison of Britain and Japan. *Soc Sci Med* 2005;60:2865-75.  
54  
55  
56  
57  
58  
59  
60

- 1  
2  
3  
4 8. Fukuda Y, Nakamura K, Takano T. Cause-specific mortality differences across socioeconomic  
5 position of municipalities in Japan, 1973-1977 and 1993-1998: Increased importance of injury  
6 and suicide in inequality for ages under 75. *Int J Epidemiol* 2005;34:100-9.  
7
- 8 9. Fukuda Y, Umezaki M, Nakamura K, Takano T. Variations in societal characteristics of spatial  
9 disease clusters: examples of colon, lung and breast cancer in Japan. *Int J Health Geogr*  
10 2005;4:16. doi:10.1186/1476-072X-4-16.  
11
- 12 10. Fukuda Y, Nakamura K, Takano T. Municipal health expectancy in Japan: decreased healthy  
13 longevity of older people in socioeconomically disadvantaged areas. *BMC Public Health*  
14 2005;5:65. doi:10.1186/1471-2458-5-65.  
15
- 16 11. Fukuda Y, Nakamura K, Takano T. Municipal socioeconomic status and mortality in Japan: sex  
17 and age differences, and trends in 1973-1998. *Soc Sci Med* 2004;59:2435-45.  
18
- 19 12. Fukuda Y, Nakamura K, Takano T. Wide range of socioeconomic factors associated with mortality  
20 among cities in Japan. *Health Promot Int* 2004;19:177-87.  
21
- 22 13. Kim D, Kawachi I, Hoorn SV, Ezzati M. Is inequality at the heart of it? Cross-country associations  
23 of income inequality with cardiovascular diseases and risk factors. *Soc Sci Med* 2008;66:1719-32.  
24
- 25 14. Elgar FJ. Income inequality, trust, and population health in 33 countries. *Am J Public Health*  
26 2010;100:2311-5.  
27
- 28 15. Karlsson M, Nilsson T, Lyttkens CH, Leeson G. Income inequality and health: importance of a  
29 cross-country perspective. *Soc Sci Med* 2010;70:875-85.  
30
- 31 16. Ministry of Internal Affairs and Communications. National Survey of Family Income and  
32 Expenditure. <http://www.stat.go.jp/english/data/zensho/index.htm>.  
33
- 34 17. Wilkinson RG, Pickett KE. Income inequality and population health: A review and explanation of  
35 the evidence. *Soc Sci Med* 2006;62:1768-84.  
36  
37  
38  
39  
40  
41  
42  
43  
44  
45  
46  
47  
48  
49  
50  
51  
52  
53  
54  
55  
56  
57  
58  
59  
60

1  
2  
3  
4  
5  
6  
7  
8  
9  
10  
11  
12  
13  
14  
15  
16  
17  
18  
19  
20  
21  
22  
23  
24  
25  
26  
27  
28  
29  
30  
31  
32  
33  
34  
35  
36  
37  
38  
39  
40  
41  
42  
43  
44  
45  
46  
47

**Supplementary Table 1.** The history of the Japan Standard Occupational Classification <sup>a</sup>

| 1st revision, 1970 |                                                     | 2nd revision, 1979 |                                                     | 3rd revision, 1986 |                                                                             | 4th revision, 1997 |                                           |
|--------------------|-----------------------------------------------------|--------------------|-----------------------------------------------------|--------------------|-----------------------------------------------------------------------------|--------------------|-------------------------------------------|
| No.                | Occupation (major group)                            | No.                | Occupation (major group)                            | No.                | Occupation (major group)                                                    | No.                | Occupation (major group) <sup>b</sup>     |
| (1) [1]            | Professional and technical workers                  | (1) [1]            | Professional and technical workers                  | (1) [1]            | Professional and technical workers                                          | (1) [1]            | Specialist and technical workers          |
| (2) [2]            | Managers and officials                              | (2) [2]            | Managers and officials                              | (2) [2]            | Managers and officials                                                      | (2) [2]            | Administrative and managerial workers     |
| (3) [3]            | Clerical and related workers                        | (3) [3]            | Clerical and related workers                        | (3) [3]            | Clerical and related workers                                                | (3) [3]            | Clerical workers                          |
| (4) [4]            | Sales workers                                       | (4) [4]            | Sales workers                                       | (4) [4]            | Sales workers                                                               | (4) [4]            | Sales workers                             |
| (5) [7]            | Farmers, Lumbermen and fishermen                    | (5) [7]            | Agricultural, forestry and fisheries workers        | (5) [5]            | Service workers                                                             | (5) [5]            | Service workers                           |
| (6) [9]            | Workers in mining and quarrying occupations         | (6) [9]            | Mining workers                                      | (6) [6]            | Protective service workers                                                  | (6) [6]            | Security workers                          |
| (7) [8]            | Workers in transport and communications occupations | (7) [8]            | Workers in transport and communications occupations | (7) [7]            | Agricultural, forestry and fisheries workers                                | (7) [7]            | Agriculture, forestry and fishery workers |
| (8) [9]            | Craftsmen, production process workers and labourers | (8) [9]            | Craftsmen, production process workers and labours   | (8) [8]            | Workers in transport and communications occupations                         | (8) [8]            | Transport and communication workers       |
| (9) [6]            | Protective service workers                          | (9) [6]            | Protective service workers                          | (9) [9]            | Craftsmen, mining, production process and construction workers and laborers | (9) [9]            | Production process and related workers    |
| (10) [5]           | Service workers                                     | (10) [5]           | Service workers                                     | (10) [10]          | Workers not classifiable by occupation                                      | (10) [10]          | Workers not classifiable by occupation    |
| (11) [10]          | Unclassifiable                                      | (11) [10]          | Workers not classifiable by occupation              | (11) [11]          | Non-employed <sup>c</sup>                                                   | (11) [11]          | Non-employed <sup>c</sup>                 |
| (12) [11]          | Non-employed <sup>c</sup>                           | (11) [11]          | Non-employed <sup>c</sup>                           |                    |                                                                             |                    |                                           |

<sup>a</sup> We consistently used occupation (major group) of the 4th revision. The number in square brackets is the classification used in this present study.

<sup>b</sup> When showing geographic inequality by occupation, we summarized these 11 occupation into six groups as follows:

- I. Clerical, technical and managerial occupations: (1) specialist and technical workers, (2) administrative and managerial workers, and (3) clerical workers
- II. Sales and service occupations: (4) sales workers, (5) service workers, and (6) security workers
- III. Agriculture, forestry and fishery occupations: (7) agriculture, forestry and fishery workers
- IV. Production and transport occupations: (8) transport and communication workers and (9) production process and related workers
- V. Unclassifiable occupations: (10) workers not classifiable by occupation
- VI. Non-employed: (11) non-employed

<sup>c</sup> Non-employed refers to the sum of unemployed and non-labor force in line with the *Report of Vital Statistics: Occupational and Industrial Aspects* .

**Supplementary Table 2.** Description of data in 47 prefectures, Japan, 1970-2005

|                         | Men           |                  |                                         |         | Women         |                  |                                         |         |
|-------------------------|---------------|------------------|-----------------------------------------|---------|---------------|------------------|-----------------------------------------|---------|
|                         | No. of deaths | Total population | Mortality rate per 100,000 <sup>a</sup> |         | No. of deaths | Total population | Mortality rate per 100,000 <sup>a</sup> |         |
|                         |               |                  | (SD)                                    | (SD)    |               |                  | (SD)                                    | (SD)    |
| Overall                 | 984,022       | 251,576,351      | 1,569                                   | (6,718) | 532,223       | 259,688,353      | 758                                     | (3,914) |
| Prefectures             |               |                  |                                         |         |               |                  |                                         |         |
| 1 Hokkaido              | 49,247        | 11,489,095       | 1,870                                   | (7,692) | 26,436        | 12,394,724       | 886                                     | (4,366) |
| 2 Aomori                | 15,202        | 2,959,355        | 1,531                                   | (6,760) | 7,282         | 3,248,812        | 471                                     | (2,143) |
| 3 Iwate                 | 13,258        | 2,856,175        | 2,187                                   | (9,429) | 6,959         | 3,067,651        | 864                                     | (4,827) |
| 4 Miyagi                | 17,042        | 4,448,360        | 1,412                                   | (5,469) | 9,137         | 4,625,004        | 728                                     | (3,064) |
| 5 Akita                 | 12,371        | 2,512,525        | 1,410                                   | (5,569) | 6,168         | 2,740,415        | 561                                     | (3,178) |
| 6 Yamagata              | 10,748        | 2,553,156        | 1,863                                   | (8,426) | 5,824         | 2,679,130        | 978                                     | (4,649) |
| 7 Fukushima             | 18,520        | 4,200,931        | 1,368                                   | (4,958) | 9,601         | 4,341,831        | 454                                     | (1,655) |
| 8 Ibaraki               | 23,125        | 5,779,563        | 1,101                                   | (3,644) | 12,135        | 5,665,132        | 511                                     | (2,853) |
| 9 Tochigi               | 16,375        | 3,976,411        | 1,643                                   | (6,942) | 8,590         | 3,941,144        | 876                                     | (3,381) |
| 10 Gunma                | 15,506        | 4,036,944        | 1,704                                   | (6,946) | 8,651         | 4,069,213        | 532                                     | (2,058) |
| 11 Saitama              | 43,148        | 13,129,693       | 1,436                                   | (5,956) | 23,114        | 12,774,631       | 519                                     | (1,419) |
| 12 Chiba                | 39,273        | 11,279,717       | 1,247                                   | (4,401) | 19,925        | 11,073,425       | 652                                     | (3,696) |
| 13 Tokyo                | 91,194        | 25,686,395       | 1,374                                   | (5,119) | 49,601        | 25,677,746       | 598                                     | (1,754) |
| 14 Kanagawa             | 54,947        | 16,940,375       | 1,330                                   | (5,569) | 28,202        | 16,194,532       | 1,053                                   | (5,584) |
| 15 Niigata              | 21,083        | 5,083,511        | 1,945                                   | (7,533) | 10,861        | 5,245,859        | 714                                     | (3,398) |
| 16 Toyama               | 9,238         | 2,300,243        | 1,606                                   | (7,190) | 5,250         | 2,429,822        | 980                                     | (5,406) |
| 17 Ishikawa             | 8,670         | 2,301,490        | 1,655                                   | (7,956) | 5,013         | 2,447,439        | 953                                     | (6,194) |
| 18 Fukui                | 5,611         | 1,643,881        | 1,677                                   | (7,209) | 3,556         | 1,721,279        | 1,391                                   | (7,473) |
| 19 Yamanashi            | 7,183         | 1,720,587        | 1,436                                   | (5,625) | 3,727         | 1,754,097        | 719                                     | (3,804) |
| 20 Nagano               | 15,876        | 4,393,794        | 2,175                                   | (8,828) | 9,505         | 4,551,945        | 853                                     | (4,017) |
| 21 Gifu                 | 14,957        | 4,139,225        | 1,515                                   | (6,609) | 9,222         | 4,333,798        | 913                                     | (4,421) |
| 22 Shizuoka             | 28,057        | 7,639,953        | 1,962                                   | (8,756) | 14,720        | 7,674,935        | 565                                     | (1,736) |
| 23 Aichi                | 46,925        | 14,066,571       | 1,626                                   | (7,368) | 26,699        | 13,817,272       | 764                                     | (2,784) |
| 24 Mie                  | 14,118        | 3,624,980        | 1,408                                   | (5,186) | 7,828         | 3,794,338        | 583                                     | (2,379) |
| 25 Shiga                | 8,125         | 2,428,751        | 1,453                                   | (5,976) | 4,883         | 2,465,170        | 782                                     | (3,805) |
| 26 Kyoto                | 18,723        | 5,109,042        | 1,166                                   | (3,889) | 11,146        | 5,465,224        | 464                                     | (2,094) |
| 27 Osaka                | 73,055        | 18,232,091       | 1,964                                   | (7,462) | 38,671        | 18,808,092       | 1,109                                   | (4,676) |
| 28 Hyogo                | 44,110        | 10,970,009       | 1,940                                   | (7,967) | 23,963        | 11,550,437       | 798                                     | (3,145) |
| 29 Nara                 | 9,755         | 2,621,500        | 1,730                                   | (7,403) | 5,598         | 2,813,039        | 971                                     | (4,423) |
| 30 Wakayama             | 10,006        | 2,169,994        | 1,276                                   | (6,597) | 5,596         | 2,358,333        | 573                                     | (2,872) |
| 31 Tottori              | 5,687         | 1,212,157        | 2,055                                   | (8,746) | 2,862         | 1,295,687        | 695                                     | (3,717) |
| 32 Shimane              | 7,103         | 1,546,077        | 2,051                                   | (8,981) | 3,829         | 1,651,580        | 891                                     | (4,704) |
| 33 Okayama              | 15,296        | 3,828,579        | 1,991                                   | (8,329) | 8,127         | 4,043,112        | 720                                     | (3,298) |
| 34 Hiroshima            | 23,074        | 5,750,006        | 1,708                                   | (6,593) | 12,338        | 6,008,967        | 852                                     | (3,726) |
| 35 Yamaguchi            | 14,671        | 3,127,157        | 2,051                                   | (8,498) | 7,883         | 3,435,624        | 582                                     | (2,276) |
| 36 Tokushima            | 7,871         | 1,661,674        | 711                                     | (1,797) | 4,406         | 1,786,025        | 454                                     | (1,935) |
| 37 Kagawa               | 8,494         | 2,052,654        | 999                                     | (3,529) | 4,743         | 2,182,213        | 551                                     | (3,159) |
| 38 Ehime                | 13,813        | 2,961,350        | 2,209                                   | (8,794) | 7,631         | 3,279,967        | 781                                     | (3,189) |
| 39 Kochi                | 8,686         | 1,627,246        | 1,004                                   | (3,355) | 4,403         | 1,792,884        | 353                                     | (1,777) |
| 40 Fukuoka              | 41,386        | 9,316,985        | 1,349                                   | (5,374) | 22,159        | 10,313,913       | 790                                     | (3,359) |
| 41 Saga                 | 7,618         | 1,664,620        | 1,458                                   | (7,446) | 4,307         | 1,844,827        | 1,057                                   | (6,718) |
| 42 Nagasaki             | 14,563        | 2,995,173        | 1,398                                   | (5,680) | 8,010         | 3,346,375        | 813                                     | (4,295) |
| 43 Kumamoto             | 15,029        | 3,485,422        | 780                                     | (2,080) | 8,554         | 3,916,400        | 623                                     | (2,600) |
| 44 Oita                 | 10,691        | 2,389,418        | 1,658                                   | (6,904) | 6,345         | 2,691,272        | 834                                     | (3,893) |
| 45 Miyazaki             | 10,422        | 2,240,503        | 1,866                                   | (8,416) | 5,606         | 2,496,028        | 1,239                                   | (7,251) |
| 46 Kagoshima            | 16,626        | 3,369,654        | 1,329                                   | (5,321) | 9,565         | 3,795,497        | 859                                     | (3,649) |
| 47 Okinawa <sup>b</sup> | 7,544         | 2,053,359        | 1,046                                   | (5,404) | 3,592         | 2,083,513        | 722                                     | (4,594) |

SD; standard deviation

<sup>a</sup> Mortality rate was calculated on the basis of the means of the proportion of deaths for each prefecture across all cell types.<sup>b</sup> The data for Okinawa prefecture were not available in 1970.

**Supplementary Table 3.** The number (percentage) of total population in each occupation, Japan, 1970-2005

|                                           | 1970       |          | 1975       |          | 1980       |          | 1985       |          | 1990       |          | 1995       |          | 2000       |          | 2005       |          |
|-------------------------------------------|------------|----------|------------|----------|------------|----------|------------|----------|------------|----------|------------|----------|------------|----------|------------|----------|
| <i>Men</i>                                |            |          |            |          |            |          |            |          |            |          |            |          |            |          |            |          |
| Specialist and technical workers          | 1,835,895  | (7.32)   | 2,080,025  | (7.25)   | 2,306,830  | (7.51)   | 3,143,412  | (9.76)   | 3,637,515  | (10.95)  | 3,991,077  | (11.72)  | 4,221,683  | (12.27)  | 3,950,815  | (11.90)  |
| Administrative and managerial workers     | 1,797,390  | (7.17)   | 1,972,340  | (6.88)   | 2,210,783  | (7.19)   | 1,868,101  | (5.80)   | 1,998,511  | (6.01)   | 2,066,172  | (6.07)   | 1,305,093  | (3.79)   | 1,031,316  | (3.11)   |
| Clerical workers                          | 2,914,350  | (11.62)  | 3,674,725  | (12.81)  | 3,637,048  | (11.83)  | 3,857,022  | (11.98)  | 3,895,784  | (11.72)  | 3,906,006  | (11.47)  | 4,077,310  | (11.85)  | 4,093,124  | (12.33)  |
| Sales workers                             | 2,681,490  | (10.69)  | 3,508,340  | (12.23)  | 4,132,015  | (13.44)  | 4,509,884  | (14.00)  | 4,794,455  | (14.43)  | 5,044,836  | (14.82)  | 5,159,661  | (15.00)  | 4,716,064  | (14.21)  |
| Service workers                           | 738,725    | (2.95)   | 984,940    | (3.43)   | 1,027,910  | (3.34)   | 1,123,385  | (3.49)   | 1,202,319  | (3.62)   | 1,270,668  | (3.73)   | 1,381,504  | (4.02)   | 1,441,522  | (4.34)   |
| Security workers                          | 438,955    | (1.75)   | 520,720    | (1.82)   | 567,438    | (1.85)   | 615,053    | (1.91)   | 660,161    | (1.99)   | 706,462    | (2.08)   | 787,325    | (2.29)   | 832,148    | (2.51)   |
| Agriculture, forestry and fishery workers | 3,531,500  | (14.08)  | 2,849,180  | (9.94)   | 2,379,666  | (7.74)   | 2,112,513  | (6.56)   | 1,615,756  | (4.86)   | 1,199,620  | (3.52)   | 899,881    | (2.62)   | 823,066    | (2.48)   |
| Transport and communication workers       | 1,682,400  | (6.71)   | 1,972,390  | (6.88)   | 2,072,133  | (6.74)   | 1,997,137  | (6.2)    | 1,984,890  | (5.97)   | 2,020,393  | (5.93)   | 1,957,847  | (5.69)   | 1,794,551  | (5.41)   |
| Production process and related workers    | 8,428,675  | (33.61)  | 9,645,620  | (33.63)  | 10,682,007 | (34.76)  | 10,644,436 | (33.05)  | 10,985,461 | (33.06)  | 10,945,330 | (32.15)  | 10,762,241 | (31.28)  | 10,451,026 | (31.48)  |
| Workers not classifiable by occupation    | 6,725      | (0.03)   | 13,870     | (0.05)   | 22,474     | (0.07)   | 50,391     | (0.16)   | 115,015    | (0.35)   | 151,362    | (0.44)   | 294,663    | (0.86)   | 502,667    | (1.51)   |
| Non-employed <sup>a</sup>                 | 1,024,357  | (4.08)   | 1,456,032  | (5.08)   | 1,696,114  | (5.52)   | 2,283,403  | (7.09)   | 2,339,703  | (7.04)   | 2,744,327  | (8.06)   | 3,559,611  | (10.35)  | 3,559,611  | (10.72)  |
| Total                                     | 25,080,462 | (100.00) | 28,678,182 | (100.00) | 30,734,418 | (100.00) | 32,204,737 | (100.00) | 33,229,570 | (100.00) | 34,046,253 | (100.00) | 34,406,819 | (100.00) | 33,195,910 | (100.00) |
| <i>Women</i>                              |            |          |            |          |            |          |            |          |            |          |            |          |            |          |            |          |
| Specialist and technical workers          | 800,245    | (3.00)   | 1,121,045  | (3.73)   | 1,507,610  | (4.72)   | 1,891,400  | (5.73)   | 2,250,231  | (6.69)   | 2,684,971  | (7.83)   | 3,094,599  | (8.87)   | 3,459,894  | (9.83)   |
| Administrative and managerial workers     | 86,615     | (0.32)   | 105,985    | (0.35)   | 155,251    | (0.49)   | 171,782    | (0.52)   | 184,219    | (0.55)   | 199,894    | (0.58)   | 142,983    | (0.41)   | 123,283    | (0.35)   |
| Clerical workers                          | 1,694,870  | (6.36)   | 2,753,760  | (9.16)   | 3,369,822  | (10.56)  | 4,248,922  | (12.86)  | 5,155,485  | (15.32)  | 5,748,954  | (16.76)  | 6,289,031  | (18.03)  | 6,422,961  | (18.25)  |
| Sales workers                             | 1,885,440  | (7.07)   | 2,152,320  | (7.16)   | 2,586,857  | (8.11)   | 2,447,212  | (7.41)   | 2,534,197  | (7.53)   | 2,702,863  | (7.88)   | 2,618,387  | (7.51)   | 2,561,132  | (7.28)   |
| Service workers                           | 1,634,865  | (6.13)   | 1,974,925  | (6.57)   | 2,106,305  | (6.60)   | 2,173,931  | (6.58)   | 2,263,285  | (6.73)   | 2,516,848  | (7.34)   | 2,825,178  | (8.10)   | 3,207,147  | (9.11)   |
| Security workers                          | 5,830      | (0.02)   | 8,010      | (0.03)   | 9,876      | (0.03)   | 12,390     | (0.04)   | 16,562     | (0.05)   | 24,289     | (0.07)   | 37,414     | (0.11)   | 43,158     | (0.12)   |
| Agriculture, forestry and fishery workers | 4,558,975  | (17.10)  | 3,154,040  | (10.49)  | 2,471,427  | (7.75)   | 2,029,368  | (6.14)   | 1,478,304  | (4.39)   | 1,055,672  | (3.08)   | 755,524    | (2.17)   | 600,419    | (1.71)   |
| Transport and communication workers       | 99,570     | (0.37)   | 108,500    | (0.36)   | 108,205    | (0.34)   | 96,205     | (0.29)   | 84,717     | (0.25)   | 93,936     | (0.27)   | 92,226     | (0.26)   | 85,394     | (0.24)   |
| Production process and related workers    | 3,546,495  | (13.30)  | 3,691,205  | (12.28)  | 4,456,927  | (13.97)  | 4,911,261  | (14.87)  | 5,158,278  | (15.33)  | 4,862,147  | (14.17)  | 4,664,292  | (13.37)  | 4,228,532  | (12.01)  |
| Workers not classifiable by occupation    | 5,285      | (0.02)   | 34,995     | (0.12)   | 24,186     | (0.08)   | 66,917     | (0.20)   | 89,544     | (0.27)   | 121,135    | (0.35)   | 223,913    | (0.64)   | 327,266    | (0.93)   |
| Non-employed <sup>a</sup>                 | 12,339,091 | (46.29)  | 14,949,973 | (49.74)  | 15,110,843 | (47.36)  | 14,978,370 | (45.35)  | 14,434,745 | (42.90)  | 14,296,062 | (41.67)  | 14,141,088 | (40.54)  | 14,141,088 | (40.17)  |
| Total                                     | 26,657,281 | (100.00) | 30,054,758 | (100.00) | 31,907,309 | (100.00) | 33,027,758 | (100.00) | 33,649,567 | (100.00) | 34,306,771 | (100.00) | 34,884,635 | (100.00) | 35,200,274 | (100.00) |

<sup>a</sup> Non-employed is the sum of unemployed and non-labor force.





**Supplementary Table 5.** Age-adjusted mortality rate per 100,000 in each occupation, Japan, 1970-2005 <sup>a</sup>

|                                           | 1970   | 1975   | 1980   | 1985  | 1990  | 1995  | 2000  | 2005  |
|-------------------------------------------|--------|--------|--------|-------|-------|-------|-------|-------|
| <i>Men</i>                                |        |        |        |       |       |       |       |       |
| Specialist and technical workers          | 340    | 282    | 319    | 257   | 234   | 223   | 312   | 231   |
| Administrative and managerial workers     | 233    | 223    | 192    | 215   | 193   | 170   | 248   | 241   |
| Clerical workers                          | 460    | 366    | 298    | 267   | 253   | 207   | 146   | 95    |
| Sales workers                             | 547    | 444    | 370    | 322   | 246   | 187   | 146   | 113   |
| Service workers                           | 515    | 389    | 488    | 426   | 476   | 442   | 401   | 348   |
| Security workers                          | 295    | 259    | 238    | 226   | 228   | 189   | 161   | 159   |
| Agriculture, forestry and fishery workers | 571    | 489    | 442    | 425   | 384   | 365   | 346   | 287   |
| Transport and communication workers       | 449    | 339    | 328    | 276   | 253   | 230   | 200   | 180   |
| Production process and related workers    | 415    | 327    | 250    | 216   | 181   | 156   | 105   | 89    |
| Workers not classifiable by occupation    | 14,668 | 15,038 | 20,796 | 9,141 | 5,935 | 7,231 | 4,900 | 768   |
| Non-employed <sup>b</sup>                 | 2,669  | 2,226  | 1,891  | 1,648 | 1,774 | 1,533 | 1,289 | 1,313 |
| <i>Women</i>                              |        |        |        |       |       |       |       |       |
| Specialist and technical workers          | 246    | 181    | 146    | 126   | 115   | 90    | 97    | 66    |
| Administrative and managerial workers     | 548    | 452    | 239    | 268   | 337   | 263   | 345   | 306   |
| Clerical workers                          | 234    | 153    | 105    | 83    | 68    | 54    | 39    | 29    |
| Sales workers                             | 197    | 164    | 137    | 135   | 111   | 81    | 68    | 55    |
| Service workers                           | 160    | 117    | 130    | 111   | 111   | 92    | 78    | 60    |
| Security workers                          | 1,615  | 1,027  | 822    | 1,335 | 991   | 508   | 398   | 390   |
| Agriculture, forestry and fishery workers | 256    | 224    | 172    | 148   | 133   | 114   | 103   | 85    |
| Transport and communication workers       | 899    | 585    | 844    | 712   | 808   | 440   | 324   | 278   |
| Production process and related workers    | 145    | 114    | 73     | 67    | 60    | 43    | 32    | 25    |
| Workers not classifiable by occupation    | 4,769  | 1,533  | 6,995  | 3,024 | 2,967 | 3,382 | 2,296 | 325   |
| Non-employed <sup>b</sup>                 | 489    | 387    | 324    | 286   | 256   | 254   | 242   | 222   |

<sup>a</sup> Age-adjusted mortality rates were calculated by the direct method, using the model population of 1985 in Japan as a reference.

<sup>b</sup> Non-employed is the sum of unemployed and non-labor force.



Supplementary Table 7. Adjusted prefecture-level residuals for all-cause premature mortality among women, Japan, 1970-2005

Table with 25 columns: Prefectures, Overall (OR, 95% CI, Rank), 1970 (OR, 95% CI, Rank), 1975 (OR, 95% CI, Rank), 1980 (OR, 95% CI, Rank), 1985 (OR, 95% CI, Rank), 1990 (OR, 95% CI, Rank), 1995 (OR, 95% CI, Rank), 2000 (OR, 95% CI, Rank), 2005 (OR, 95% CI, Rank). Rows list prefectures from Hokkaido to Okinawa.

CI; confidence interval, NA; not available, OR; odds ratio
Prefectures with a lower estimate of odds for all-cause premature mortality are ranked higher. The reference is the grand mean of all the prefectures.

**Supplementary Table 8.** Variance and covariance matrices of prefecture-level variances of each occupation group, Japan, 1970-2005 <sup>a</sup>

|                                                | Men                                            |                                    |                                               |                                      |                                  |                                  | Women                                          |                                    |                                               |                                      |                                  |                                  |
|------------------------------------------------|------------------------------------------------|------------------------------------|-----------------------------------------------|--------------------------------------|----------------------------------|----------------------------------|------------------------------------------------|------------------------------------|-----------------------------------------------|--------------------------------------|----------------------------------|----------------------------------|
|                                                | Clerical, technical and managerial occupations | Sales and service occupations      | Agriculture, forestry and fishery occupations | Production and transport occupations | Unclassifiable occupations       | Non-employed <sup>b</sup>        | Clerical, technical and managerial occupations | Sales and service occupations      | Agriculture, forestry and fishery occupations | Production and transport occupations | Unclassifiable occupations       | Non-employed <sup>b</sup>        |
| Clerical, technical and managerial occupations | 0.005<br>(0.001)<br><i>1.000</i>               |                                    |                                               |                                      |                                  |                                  | 0.008<br>(0.002)<br><i>1.000</i>               |                                    |                                               |                                      |                                  |                                  |
| Sales and service occupations                  | 0.006<br>(0.002)<br><i>0.716</i>               | 0.014<br>(0.003)<br><i>1.000</i>   |                                               |                                      |                                  |                                  | 0.003<br>(0.002)<br><i>0.345</i>               | 0.010<br>(0.002)<br><i>1.000</i>   |                                               |                                      |                                  |                                  |
| Agriculture, forestry and fishery occupations  | 0.002<br>(0.001)<br><i>0.303</i>               | 0.005<br>(0.002)<br><i>0.506</i>   | 0.006<br>(0.001)<br><i>1.000</i>              |                                      |                                  |                                  | 0.002<br>(0.002)<br><i>0.176</i>               | 0.004<br>(0.002)<br><i>0.393</i>   | 0.013<br>(0.003)<br><i>1.000</i>              |                                      |                                  |                                  |
| Production and transport occupations           | 0.006<br>(0.002)<br><i>0.731</i>               | 0.012<br>(0.003)<br><i>0.920</i>   | 0.004<br>(0.002)<br><i>0.484</i>              | 0.013<br>(0.003)<br><i>1.000</i>     |                                  |                                  | 0.004<br>(0.002)<br><i>0.472</i>               | 0.006<br>(0.002)<br><i>0.544</i>   | 0.004<br>(0.002)<br><i>0.308</i>              | 0.011<br>(0.003)<br><i>1.000</i>     |                                  |                                  |
| Unclassifiable occupations                     | -0.007<br>(0.007)<br><i>-0.168</i>             | -0.003<br>(0.010)<br><i>-0.051</i> | 0.006<br>(0.007)<br><i>0.139</i>              | -0.005<br>(0.010)<br><i>-0.078</i>   | 0.317<br>(0.066)<br><i>1.000</i> |                                  | -0.022<br>(0.009)<br><i>-0.440</i>             | -0.014<br>(0.009)<br><i>-0.247</i> | -0.019<br>(0.011)<br><i>-0.297</i>            | -0.014<br>(0.010)<br><i>-0.244</i>   | 0.331<br>(0.070)<br><i>1.000</i> |                                  |
| Non-employed <sup>b</sup>                      | -0.001<br>(0.001)<br><i>-0.226</i>             | -0.003<br>(0.001)<br><i>-0.387</i> | -0.0002<br>(0.001)<br><i>-0.030</i>           | -0.003<br>(0.001)<br><i>-0.358</i>   | 0.006<br>(0.007)<br><i>0.144</i> | 0.006<br>(0.001)<br><i>1.000</i> | -0.002<br>(0.001)<br><i>-0.198</i>             | 0.005<br>(0.002)<br><i>0.508</i>   | -0.002<br>(0.002)<br><i>-0.203</i>            | -0.001<br>(0.002)<br><i>-0.112</i>   | 0.014<br>(0.008)<br><i>0.262</i> | 0.008<br>(0.002)<br><i>1.000</i> |

<sup>a</sup> The number in parentheses is a standard error of the corresponding variances and covariances. The italicized numbers are correlation coefficients.

<sup>b</sup> Non-employed is the sum of unemployed and non-labor force.



**Supplementary Table 10.** Odds ratios for all-cause premature mortality of prefecture-level socioeconomic status variables, Japan, 1970-2005 <sup>a</sup>

|                                                  | Overall |                | 1970 <sup>b</sup> |                | 1975 <sup>b</sup> |                | 1980 |                | 1985 |                | 1990 |                | 1995 |                | 2000 |                | 2005 |                |
|--------------------------------------------------|---------|----------------|-------------------|----------------|-------------------|----------------|------|----------------|------|----------------|------|----------------|------|----------------|------|----------------|------|----------------|
|                                                  | OR      | (95% CI)       | OR                | (95% CI)       | OR                | (95% CI)       | OR   | (95% CI)       | OR   | (95% CI)       | OR   | (95% CI)       | OR   | (95% CI)       | OR   | (95% CI)       | OR   | (95% CI)       |
| <i>Men</i>                                       |         |                |                   |                |                   |                |      |                |      |                |      |                |      |                |      |                |      |                |
| Gini's coefficient of yearly income <sup>c</sup> |         |                |                   |                |                   |                |      |                |      |                |      |                |      |                |      |                |      |                |
| Low                                              | 1.00    | Reference      | 1.00              | Reference      | 1.00              | Reference      | 1.00 | Reference      | 1.00 | Reference      | 1.00 | Reference      | 1.00 | Reference      | 1.00 | Reference      | 1.00 | Reference      |
| Middle                                           | 1.01    | (0.99 to 1.03) | 1.03              | (0.98 to 1.07) | 1.03              | (0.99 to 1.07) | 1.01 | (0.97 to 1.06) | 1.00 | (0.97 to 1.04) | 1.03 | (0.99 to 1.07) | 0.99 | (0.93 to 1.04) | 1.02 | (0.96 to 1.08) | 0.99 | (0.92 to 1.07) |
| High                                             | 1.01    | (0.98 to 1.03) | 1.03              | (0.99 to 1.07) | 1.01              | (0.97 to 1.05) | 0.99 | (0.95 to 1.04) | 0.98 | (0.94 to 1.01) | 0.99 | (0.95 to 1.03) | 1.00 | (0.94 to 1.06) | 0.98 | (0.93 to 1.05) | 0.98 | (0.91 to 1.06) |
| Average yearly income <sup>c</sup>               |         |                |                   |                |                   |                |      |                |      |                |      |                |      |                |      |                |      |                |
| High                                             | 1.00    | Reference      | 1.00              | Reference      | 1.00              | Reference      | 1.00 | Reference      | 1.00 | Reference      | 1.00 | Reference      | 1.00 | Reference      | 1.00 | Reference      | 1.00 | Reference      |
| Middle                                           | 0.99    | (0.97 to 1.02) | 0.99              | (0.95 to 1.03) | 1.04              | (1.00 to 1.08) | 1.05 | (1.00 to 1.09) | 0.99 | (0.95 to 1.03) | 1.00 | (0.96 to 1.04) | 1.05 | (0.99 to 1.11) | 1.07 | (1.01 to 1.13) | 0.99 | (0.91 to 1.07) |
| Low                                              | 0.99    | (0.96 to 1.02) | 1.04              | (1.00 to 1.08) | 1.05              | (1.01 to 1.08) | 1.04 | (0.99 to 1.09) | 0.98 | (0.94 to 1.02) | 0.96 | (0.92 to 1.00) | 1.01 | (0.96 to 1.07) | 1.04 | (0.98 to 1.10) | 1.03 | (0.96 to 1.11) |
| Average savings <sup>c</sup>                     |         |                |                   |                |                   |                |      |                |      |                |      |                |      |                |      |                |      |                |
| High                                             | 1.00    | Reference      | 1.00              | Reference      | 1.00              | Reference      | 1.00 | Reference      | 1.00 | Reference      | 1.00 | Reference      | 1.00 | Reference      | 1.00 | Reference      | 1.00 | Reference      |
| Middle                                           | 1.00    | (0.97 to 1.02) | 1.04              | (1.00 to 1.08) | 1.04              | (1.00 to 1.08) | 1.02 | (0.97 to 1.07) | 1.02 | (0.98 to 1.06) | 0.99 | (0.95 to 1.03) | 1.05 | (0.99 to 1.11) | 1.07 | (1.01 to 1.13) | 1.03 | (0.95 to 1.11) |
| Low                                              | 1.01    | (0.98 to 1.05) | 1.07              | (1.03 to 1.12) | 1.05              | (1.01 to 1.09) | 1.02 | (0.98 to 1.07) | 0.99 | (0.95 to 1.03) | 0.97 | (0.93 to 1.01) | 1.04 | (0.98 to 1.10) | 1.07 | (1.01 to 1.14) | 1.08 | (1.00 to 1.16) |
| <i>Women</i>                                     |         |                |                   |                |                   |                |      |                |      |                |      |                |      |                |      |                |      |                |
| Gini's coefficient of yearly income <sup>c</sup> |         |                |                   |                |                   |                |      |                |      |                |      |                |      |                |      |                |      |                |
| Low                                              | 1.00    | Reference      | 1.00              | Reference      | 1.00              | Reference      | 1.00 | Reference      | 1.00 | Reference      | 1.00 | Reference      | 1.00 | Reference      | 1.00 | Reference      | 1.00 | Reference      |
| Middle                                           | 1.00    | (0.97 to 1.02) | 0.98              | (0.93 to 1.05) | 1.01              | (0.95 to 1.08) | 1.00 | (0.95 to 1.05) | 1.04 | (0.99 to 1.09) | 1.02 | (0.97 to 1.07) | 0.97 | (0.90 to 1.03) | 0.96 | (0.89 to 1.03) | 0.99 | (0.91 to 1.07) |
| High                                             | 1.01    | (0.98 to 1.04) | 1.01              | (0.95 to 1.07) | 1.04              | (0.98 to 1.11) | 1.04 | (0.98 to 1.10) | 1.05 | (1.00 to 1.10) | 1.02 | (0.97 to 1.07) | 0.99 | (0.93 to 1.06) | 0.99 | (0.92 to 1.07) | 1.00 | (0.93 to 1.09) |
| Average yearly income <sup>c</sup>               |         |                |                   |                |                   |                |      |                |      |                |      |                |      |                |      |                |      |                |
| High                                             | 1.00    | Reference      | 1.00              | Reference      | 1.00              | Reference      | 1.00 | Reference      | 1.00 | Reference      | 1.00 | Reference      | 1.00 | Reference      | 1.00 | Reference      | 1.00 | Reference      |
| Middle                                           | 1.01    | (0.98 to 1.04) | 1.09              | (1.03 to 1.15) | 1.07              | (1.01 to 1.13) | 1.01 | (0.96 to 1.06) | 1.04 | (0.99 to 1.10) | 1.01 | (0.97 to 1.07) | 1.00 | (0.94 to 1.07) | 1.06 | (0.99 to 1.14) | 0.96 | (0.89 to 1.04) |
| Low                                              | 1.02    | (0.99 to 1.06) | 1.10              | (1.05 to 1.16) | 1.09              | (1.04 to 1.16) | 1.05 | (0.99 to 1.11) | 1.04 | (0.98 to 1.09) | 1.02 | (0.97 to 1.08) | 1.04 | (0.98 to 1.12) | 1.04 | (0.97 to 1.12) | 1.04 | (0.96 to 1.13) |
| Average savings <sup>c</sup>                     |         |                |                   |                |                   |                |      |                |      |                |      |                |      |                |      |                |      |                |
| High                                             | 1.00    | Reference      | 1.00              | Reference      | 1.00              | Reference      | 1.00 | Reference      | 1.00 | Reference      | 1.00 | Reference      | 1.00 | Reference      | 1.00 | Reference      | 1.00 | Reference      |
| Middle                                           | 1.00    | (0.97 to 1.03) | 1.09              | (1.03 to 1.15) | 1.05              | (0.99 to 1.12) | 1.01 | (0.96 to 1.07) | 1.02 | (0.96 to 1.07) | 1.08 | (1.03 to 1.13) | 1.03 | (0.96 to 1.10) | 1.05 | (0.98 to 1.13) | 1.01 | (0.93 to 1.09) |
| Low                                              | 1.02    | (0.98 to 1.06) | 1.08              | (1.02 to 1.14) | 1.04              | (0.98 to 1.11) | 1.02 | (0.96 to 1.07) | 1.01 | (0.96 to 1.07) | 1.03 | (0.98 to 1.07) | 1.06 | (0.99 to 1.13) | 1.08 | (1.00 to 1.16) | 1.05 | (0.97 to 1.14) |

CI; confidence interval, OR; odds ratio

<sup>a</sup> These odds ratios were adjusted for age, occupations, and year (only in the overall model). Prefecture-level variables were adjusted for separately.

<sup>b</sup> Gini's coefficients of yearly income were not available in these models, and we imputed the values of the 1980 model to them.

<sup>c</sup> These variables were calculated among two-or-more-person households.

1  
2  
3  
4  
5  
6  
7  
8  
9  
10  
11  
12  
13  
14  
15  
16  
17  
18  
19  
20  
21  
22  
23  
24  
25  
26  
27  
28  
29  
30  
31  
32  
33  
34  
35  
36  
37  
38  
39  
40  
41  
42  
43  
44  
45  
46  
47

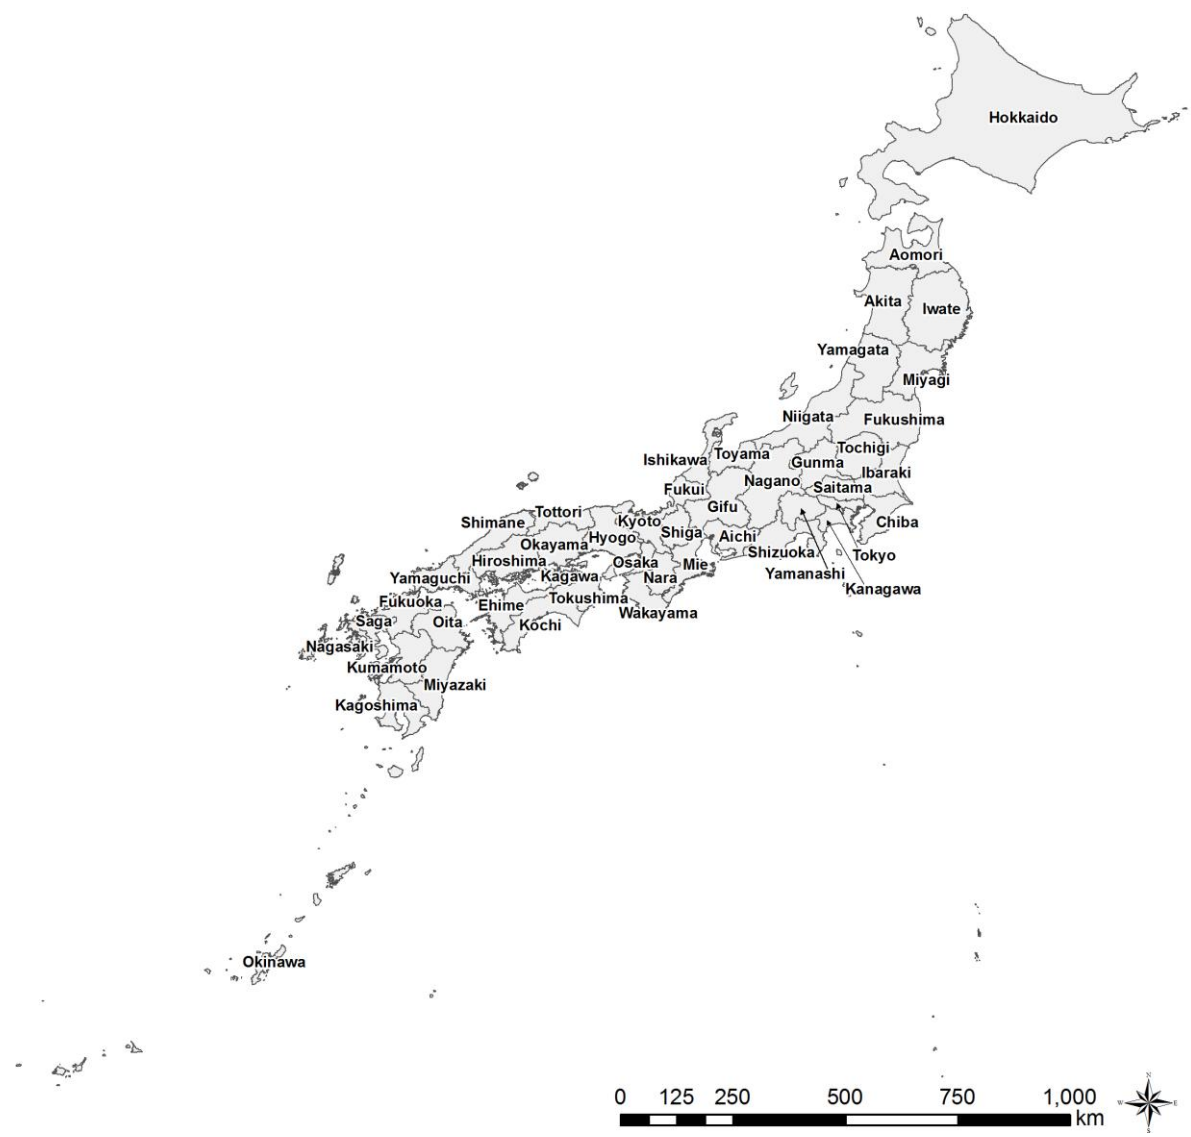

Supplementary Figure 1. A blank map of Japan.

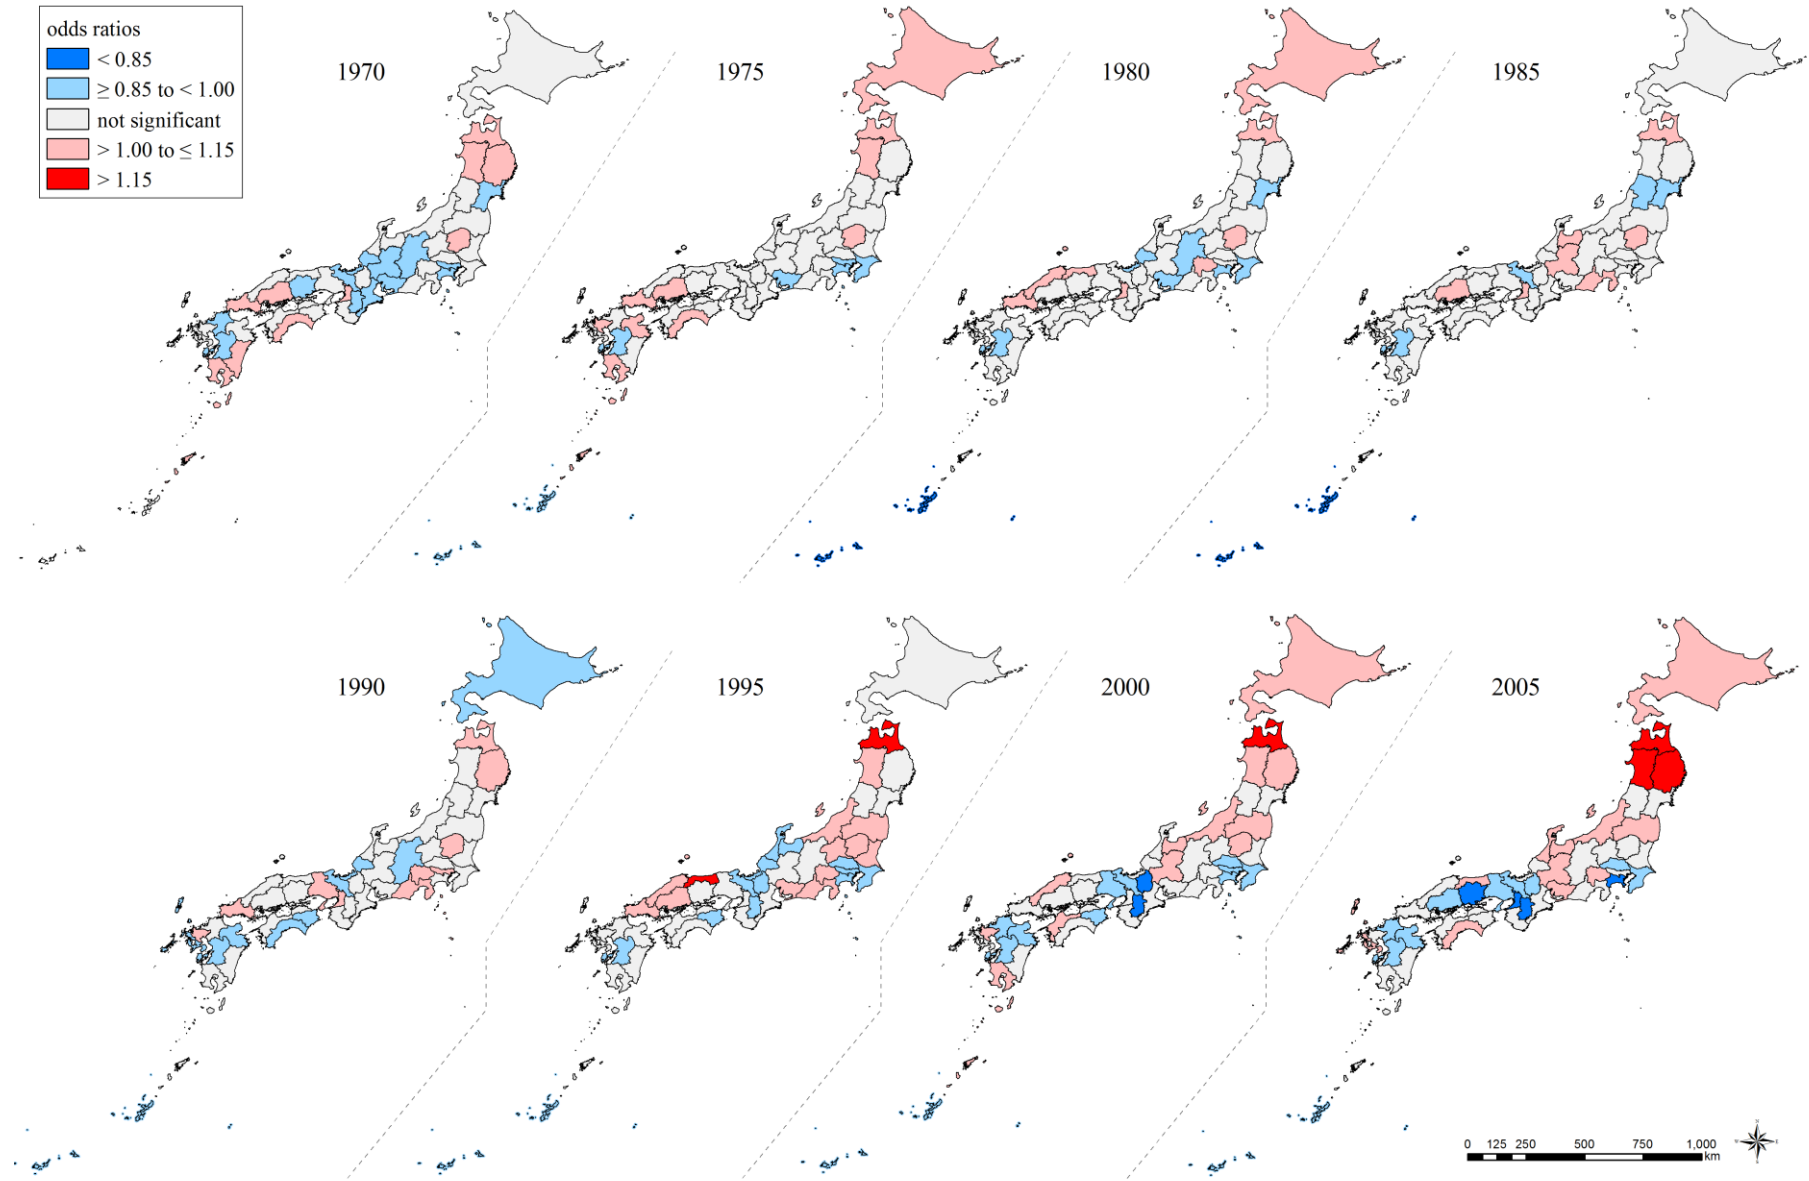

**Supplementary Figure 2.** Geographic and temporal variation in all-cause premature mortality among men, Japan.

1  
2  
3  
4  
5  
6  
7  
8  
9  
10  
11  
12  
13  
14  
15  
16  
17  
18  
19  
20  
21  
22  
23  
24  
25  
26  
27  
28  
29  
30  
31  
32  
33  
34  
35  
36  
37  
38  
39  
40  
41  
42  
43  
44  
45  
46  
47



1  
2  
3  
4  
5  
6  
7  
8  
9  
10  
11  
12  
13  
14  
15  
16  
17  
18  
19  
20  
21  
22  
23  
24  
25  
26  
27  
28  
29  
30  
31  
32  
33  
34  
35  
36  
37  
38  
39  
40  
41  
42  
43  
44  
45  
46  
47

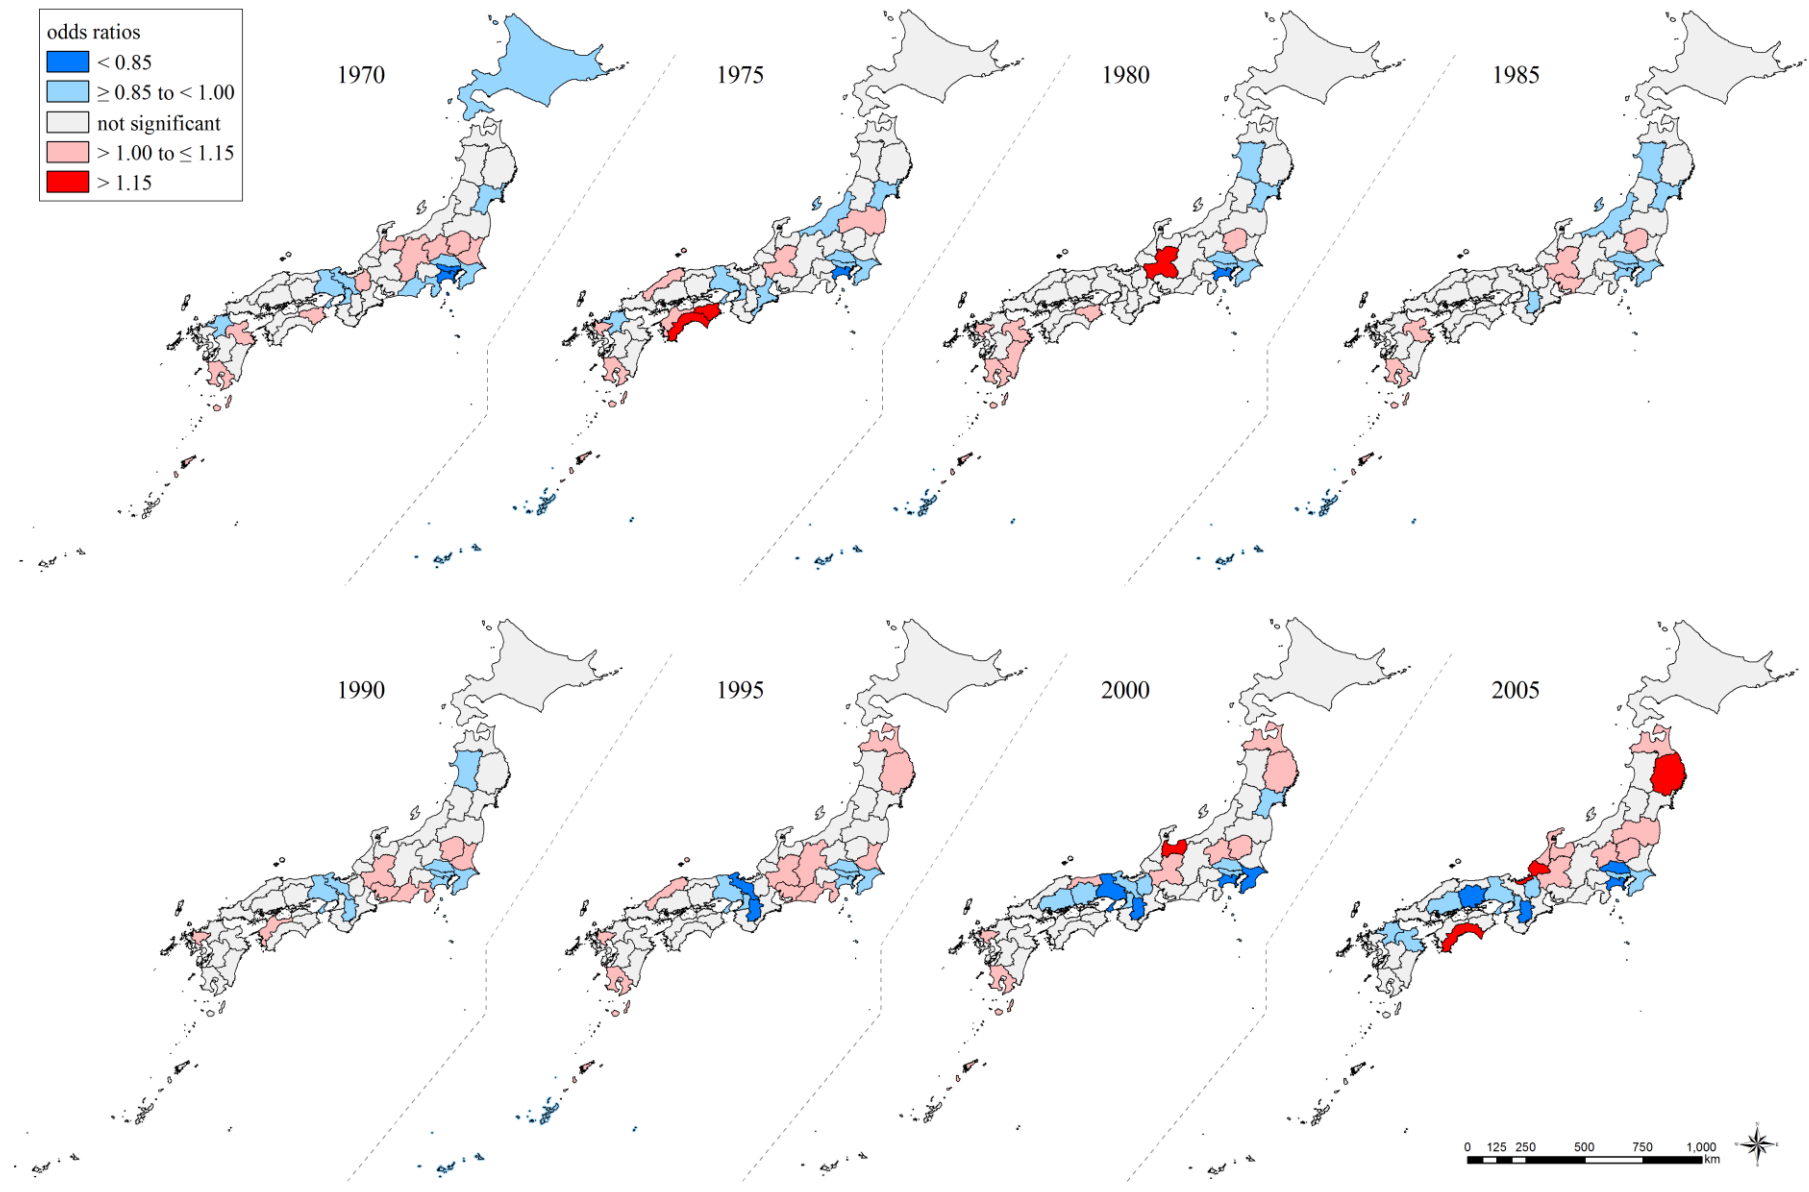

Supplementary Figure 3. Geographic and temporal variation in all-cause premature mortality among women, Japan.

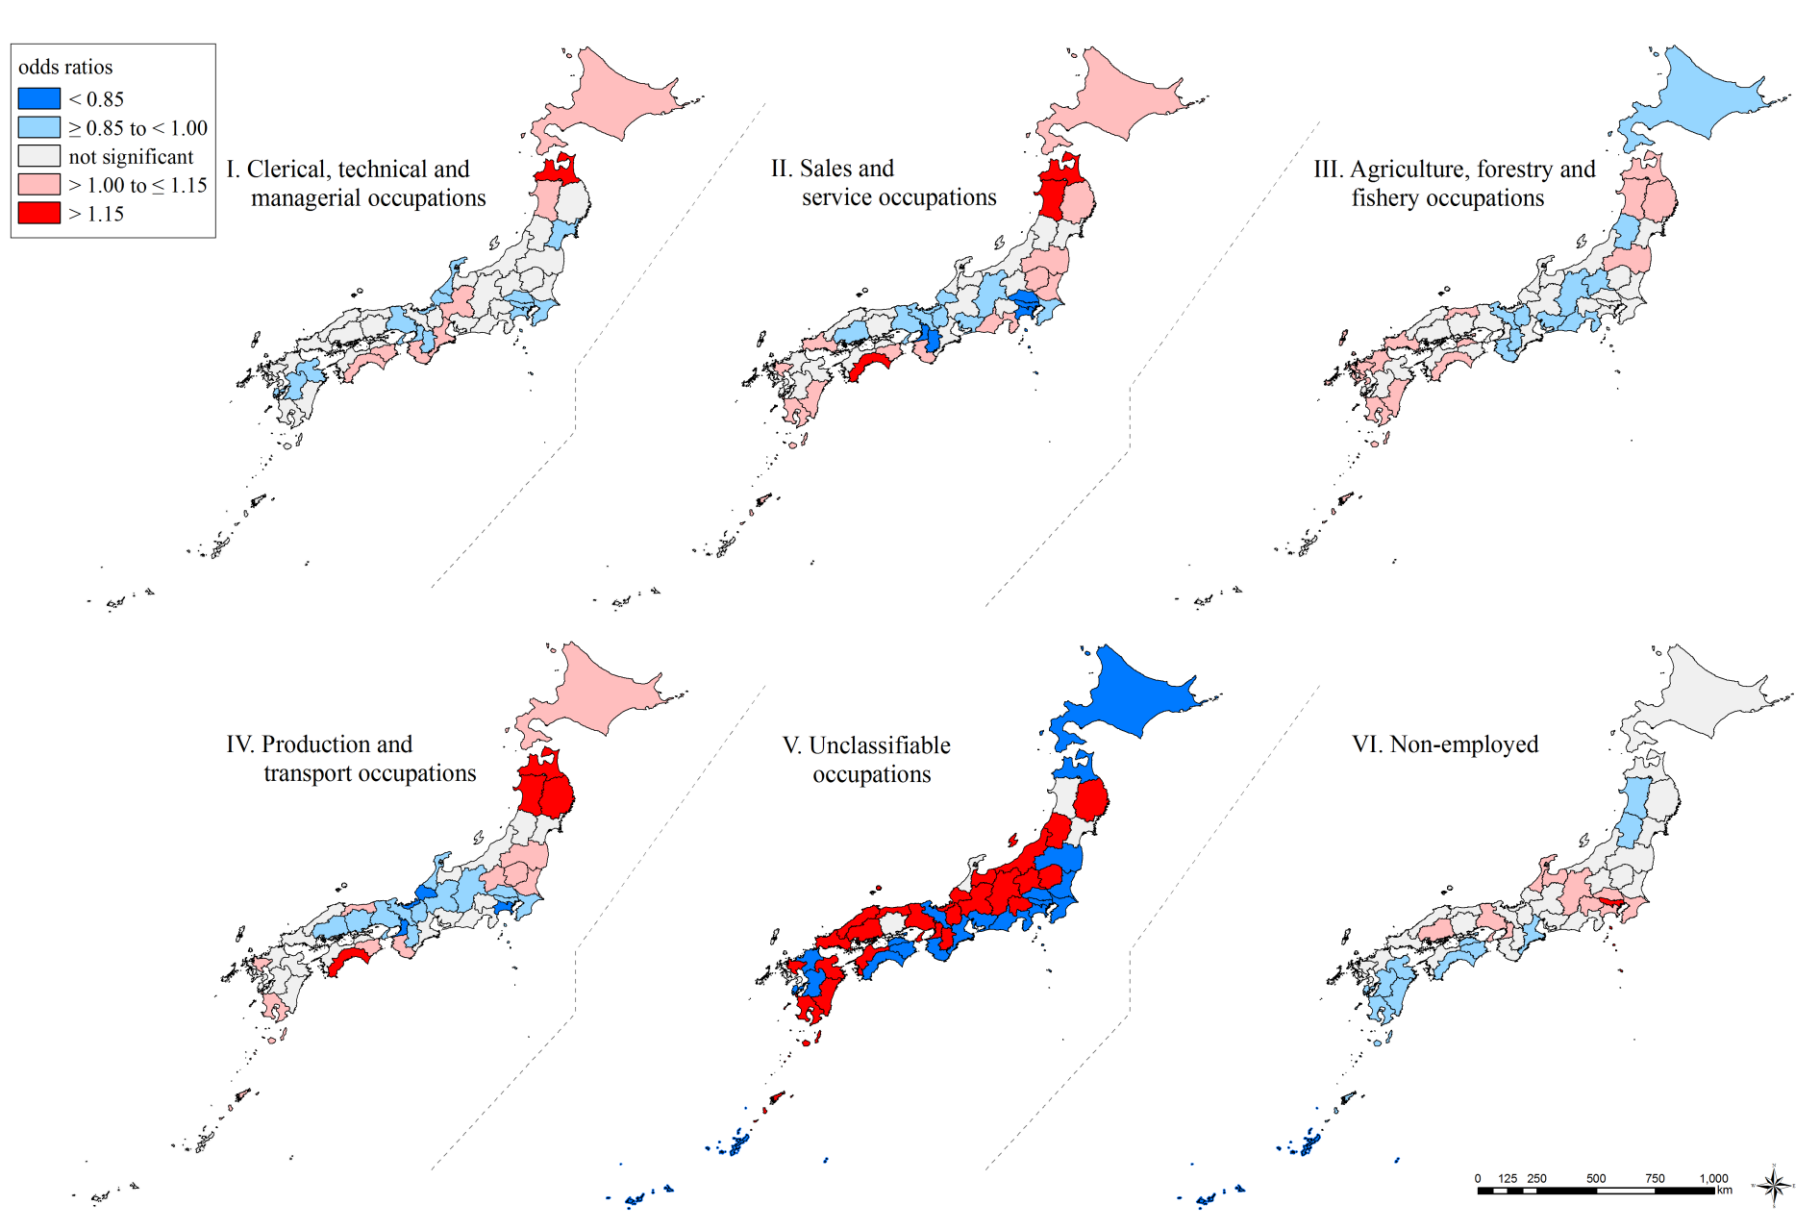

**Supplementary Figure 4.** Geographic inequality of all-cause premature mortality by occupational groups among men, Japan, 1970-2005.

1  
2  
3  
4  
5  
6  
7  
8  
9  
10  
11  
12  
13  
14  
15  
16  
17  
18  
19  
20  
21  
22  
23  
24  
25  
26  
27  
28  
29  
30  
31  
32  
33  
34  
35  
36  
37  
38  
39  
40  
41  
42  
43  
44  
45  
46  
47

1  
2  
3  
4  
5  
6  
7  
8  
9  
10  
11  
12  
13  
14  
15  
16  
17  
18  
19  
20  
21  
22  
23  
24  
25  
26  
27  
28  
29  
30  
31  
32  
33  
34  
35  
36  
37  
38  
39  
40  
41  
42  
43  
44  
45  
46  
47

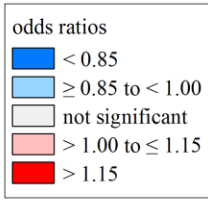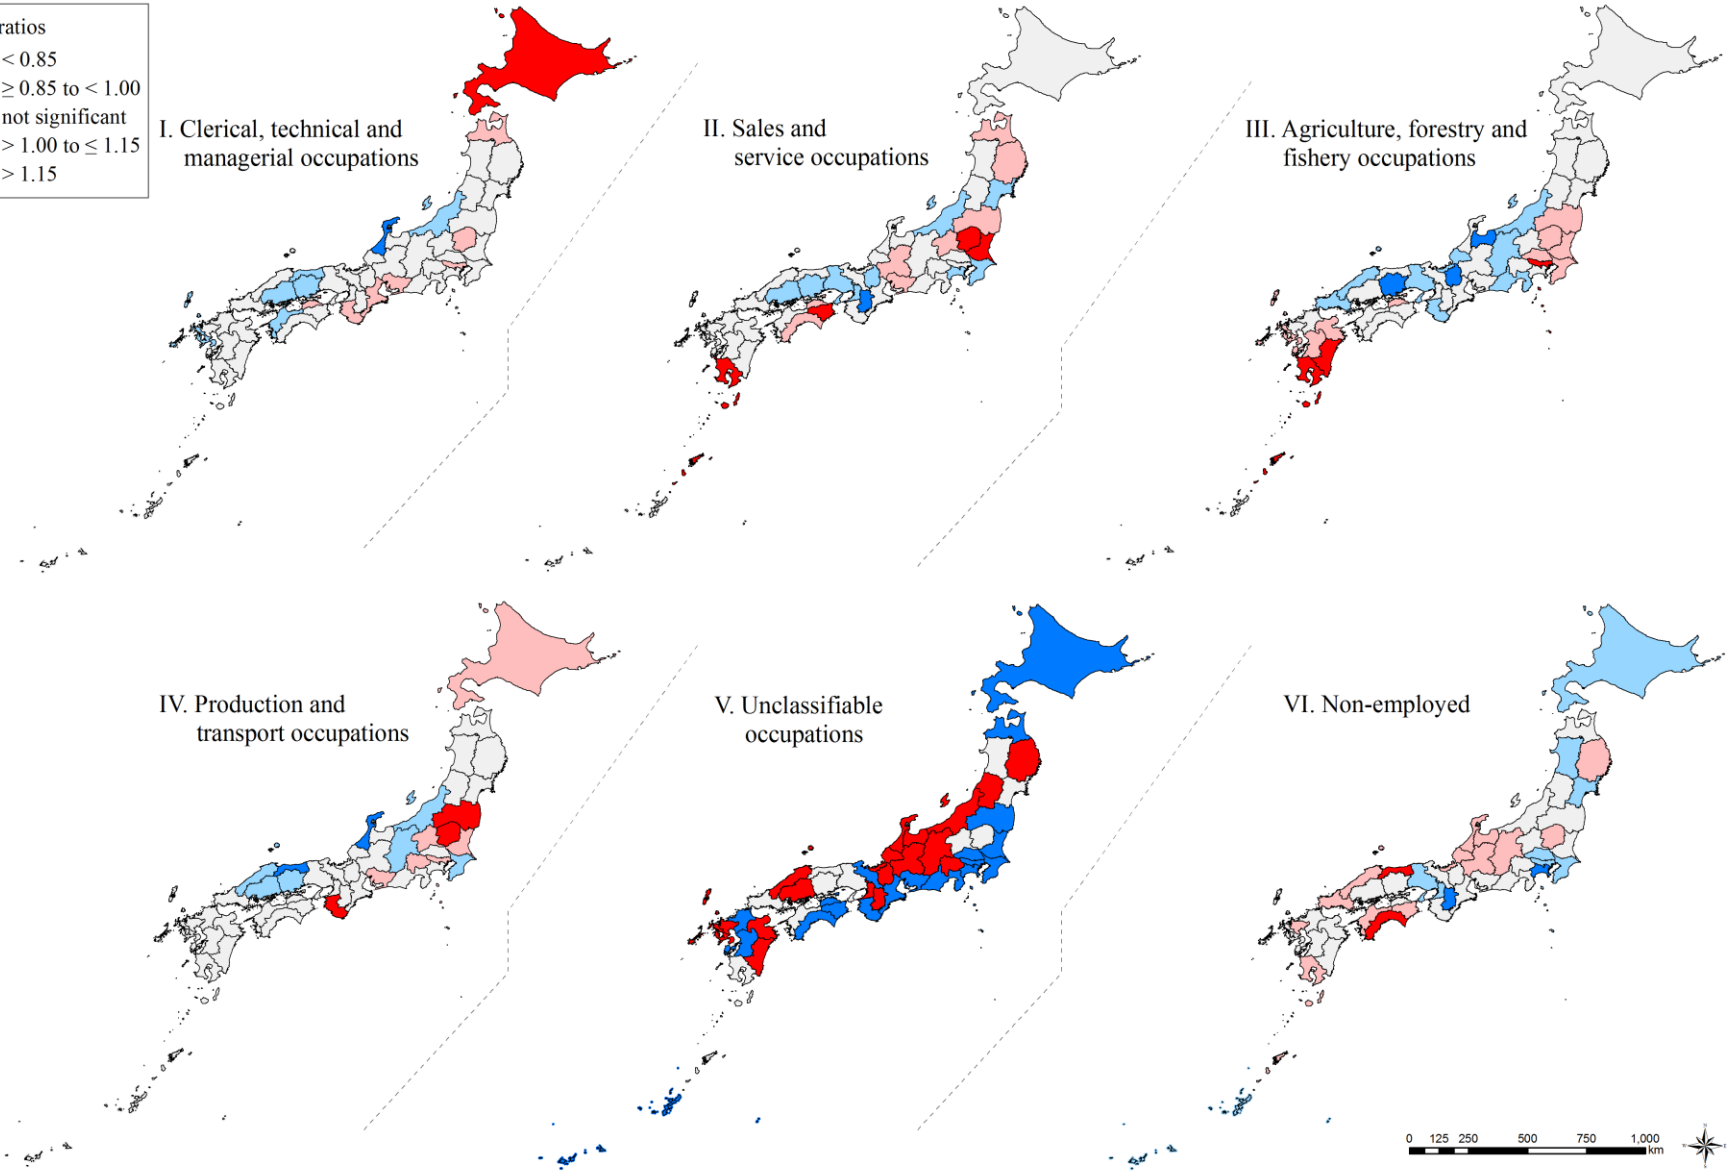

Supplementary Figure 5. Geographic inequality of all-cause premature mortality by occupational groups among women, Japan, 1970-2005.

## Legends of Supplementary Figures

### Supplementary Figure 1. A blank map of Japan.

We show the locations of 47 prefectures in Japan.

### Supplementary Figure 2. Geographic and temporal variation in all-cause premature mortality among men, Japan.

We show year-specific geographic inequality of all-cause mortality across 47 prefectures, conditional on individual age and occupation. (The data for Okinawa prefecture were not available in 1970.) Prefecture-level residuals are described in odds ratios with the reference being the grand mean of all the prefectures. Prefectures with a lower and a higher estimate of odds for mortality are filled with blue and red, respectively. Regarding areas filled with gray, prefecture-level residuals were not statistically significant.

### Supplementary Figure 3. Geographic and temporal variation in all-cause premature mortality among women, Japan.

We show year-specific geographic inequality of all-cause mortality across 47 prefectures, conditional on individual age and occupation. (The data for Okinawa prefecture were not available in 1970.) Prefecture-level residuals are described in odds ratios with the reference being the grand mean of all the prefectures. Prefectures with a lower and a higher estimate of odds for mortality are filled with blue and red, respectively. Regarding areas filled with gray, prefecture-level residuals were not statistically significant.

### Supplementary Figure 4. Geographic inequality of all-cause premature mortality by occupational groups among men, Japan, 1970-2005.

We show the geographic inequality of all-cause mortality across 47 prefectures for the six collapsed occupational groups, conditional on individual age, occupation, and year. Prefecture-level residuals are described in odds ratios with the reference being the grand mean of all the prefectures. Prefectures with a lower and a higher estimate of odds for mortality are filled with blue and red, respectively. Regarding areas filled with gray, prefecture-level residuals were not statistically significant.

### Supplementary Figure 5. Geographic inequality of all-cause premature mortality by occupational groups among women, Japan, 1970-2005.

We show the geographic inequality of all-cause mortality across 47 prefectures for the six collapsed occupational groups, conditional on individual age, occupation, and year. Prefecture-level residuals are described in odds ratios with the reference being the grand mean of all the prefectures. Prefectures with a lower and a higher estimate of odds for mortality are filled with blue and red, respectively. Regarding areas filled with gray, prefecture-level residuals were not statistically significant.

1 STROBE Statement—Checklist of items that should be included in reports of *cohort studies*

|                              | Item No | Recommendation                                                                                                                                                                                    |     |
|------------------------------|---------|---------------------------------------------------------------------------------------------------------------------------------------------------------------------------------------------------|-----|
| <b>Title and abstract</b>    | 1       | (a) Indicate the study's design with a commonly used term in the title or the abstract                                                                                                            | Yes |
|                              |         | (b) Provide in the abstract an informative and balanced summary of what was done and what was found                                                                                               | Yes |
| <b>Introduction</b>          |         |                                                                                                                                                                                                   |     |
| Background/rationale         | 2       | Explain the scientific background and rationale for the investigation being reported                                                                                                              | Yes |
| Objectives                   | 3       | State specific objectives, including any prespecified hypotheses                                                                                                                                  | Yes |
| <b>Methods</b>               |         |                                                                                                                                                                                                   |     |
| Study design                 | 4       | Present key elements of study design early in the paper                                                                                                                                           | Yes |
| Setting                      | 5       | Describe the setting, locations, and relevant dates, including periods of recruitment, exposure, follow-up, and data collection                                                                   | Yes |
| Participants                 | 6       | (a) Give the eligibility criteria, and the sources and methods of selection of participants. Describe methods of follow-up                                                                        | Yes |
|                              |         | (b) For matched studies, give matching criteria and number of exposed and unexposed                                                                                                               | NA  |
| Variables                    | 7       | Clearly define all outcomes, exposures, predictors, potential confounders, and effect modifiers. Give diagnostic criteria, if applicable                                                          | Yes |
| Data sources/<br>measurement | 8*      | For each variable of interest, give sources of data and details of methods of assessment (measurement). Describe comparability of assessment methods if there is more than one group              | NA  |
| Bias                         | 9       | Describe any efforts to address potential sources of bias                                                                                                                                         | Yes |
| Study size                   | 10      | Explain how the study size was arrived at                                                                                                                                                         | NA  |
| Quantitative variables       | 11      | Explain how quantitative variables were handled in the analyses. If applicable, describe which groupings were chosen and why                                                                      | Yes |
| Statistical methods          | 12      | (a) Describe all statistical methods, including those used to control for confounding                                                                                                             | Yes |
|                              |         | (b) Describe any methods used to examine subgroups and interactions                                                                                                                               | Yes |
|                              |         | (c) Explain how missing data were addressed                                                                                                                                                       | NA  |
|                              |         | (d) If applicable, explain how loss to follow-up was addressed                                                                                                                                    | NA  |
|                              |         | (e) Describe any sensitivity analyses                                                                                                                                                             | Yes |
| <b>Results</b>               |         |                                                                                                                                                                                                   |     |
| Participants                 | 13*     | (a) Report numbers of individuals at each stage of study—eg numbers potentially eligible, examined for eligibility, confirmed eligible, included in the study, completing follow-up, and analysed | Yes |
|                              |         | (b) Give reasons for non-participation at each stage                                                                                                                                              | NA  |
|                              |         | (c) Consider use of a flow diagram                                                                                                                                                                | NA  |
| Descriptive data             | 14*     | (a) Give characteristics of study participants (eg demographic, clinical, social) and information on exposures and potential confounders                                                          | Yes |
|                              |         | (b) Indicate number of participants with missing data for each variable of interest                                                                                                               | NA  |
|                              |         | (c) Summarise follow-up time (eg, average and total amount)                                                                                                                                       | NA  |
| Outcome data                 | 15*     | Report numbers of outcome events or summary measures over time                                                                                                                                    | Yes |
| Main results                 | 16      | (a) Give unadjusted estimates and, if applicable, confounder-adjusted estimates and their precision (eg, 95% confidence interval). Make clear which                                               | Yes |

|                          |    |                                                                                                                                                                            |     |
|--------------------------|----|----------------------------------------------------------------------------------------------------------------------------------------------------------------------------|-----|
|                          |    | confounders were adjusted for and why they were included                                                                                                                   |     |
|                          |    | (b) Report category boundaries when continuous variables were categorized                                                                                                  | Yes |
|                          |    | (c) If relevant, consider translating estimates of relative risk into absolute risk for a meaningful time period                                                           | Yes |
| Other analyses           | 17 | Report other analyses done—eg analyses of subgroups and interactions, and sensitivity analyses                                                                             | Yes |
| <b>Discussion</b>        |    |                                                                                                                                                                            |     |
| Key results              | 18 | Summarise key results with reference to study objectives                                                                                                                   | Yes |
| Limitations              | 19 | Discuss limitations of the study, taking into account sources of potential bias or imprecision. Discuss both direction and magnitude of any potential bias                 | Yes |
| Interpretation           | 20 | Give a cautious overall interpretation of results considering objectives, limitations, multiplicity of analyses, results from similar studies, and other relevant evidence | Yes |
| Generalisability         | 21 | Discuss the generalisability (external validity) of the study results                                                                                                      | Yes |
| <b>Other information</b> |    |                                                                                                                                                                            |     |
| Funding                  | 22 | Give the source of funding and the role of the funders for the present study and, if applicable, for the original study on which the present article is based              | Yes |

\*Give information separately for exposed and unexposed groups.

**Note:** An Explanation and Elaboration article discusses each checklist item and gives methodological background and published examples of transparent reporting. The STROBE checklist is best used in conjunction with this article (freely available on the Web sites of PLoS Medicine at <http://www.plosmedicine.org/>, Annals of Internal Medicine at <http://www.annals.org/>, and Epidemiology at <http://www.epidem.com/>). Information on the STROBE Initiative is available at <http://www.strobe-statement.org>.



**Social and geographic inequalities in premature adult mortality in Japan: an observational study from 1970 to 2005**

|                                                                                                                                                                                                   |                                                                                                                                                                                                                                                                                                                                                                                                                                                                                                                                                                                                         |
|---------------------------------------------------------------------------------------------------------------------------------------------------------------------------------------------------|---------------------------------------------------------------------------------------------------------------------------------------------------------------------------------------------------------------------------------------------------------------------------------------------------------------------------------------------------------------------------------------------------------------------------------------------------------------------------------------------------------------------------------------------------------------------------------------------------------|
| Journal:                                                                                                                                                                                          | <i>BMJ Open</i>                                                                                                                                                                                                                                                                                                                                                                                                                                                                                                                                                                                         |
| Manuscript ID:                                                                                                                                                                                    | bmjopen-2011-000425.R2                                                                                                                                                                                                                                                                                                                                                                                                                                                                                                                                                                                  |
| Article Type:                                                                                                                                                                                     | Research                                                                                                                                                                                                                                                                                                                                                                                                                                                                                                                                                                                                |
| Date Submitted by the Author:                                                                                                                                                                     | 04-Feb-2012                                                                                                                                                                                                                                                                                                                                                                                                                                                                                                                                                                                             |
| Complete List of Authors:                                                                                                                                                                         | Suzuki, Etsuji; Okayama University Graduate School of Medicine, Dentistry and Pharmaceutical Sciences, Department of Epidemiology<br>Kashima, Saori; Hiroshima University Graduate School of Biomedical Sciences, Department of Public Health and Health Policy; Okayama University Graduate School of Medicine, Dentistry and Pharmaceutical Sciences, Department of Epidemiology<br>Kawachi, Ichiro; Harvard School of Public Health, Department of Society, Human Development, and Health<br>Subramanian, S V; Harvard School of Public Health, Department of Society, Human Development, and Health |
| <b>Primary Subject Heading</b>:                                                                                                                                                                   | Epidemiology                                                                                                                                                                                                                                                                                                                                                                                                                                                                                                                                                                                            |
| Secondary Subject Heading:                                                                                                                                                                        | Public health, Occupational and environmental medicine, Sociology                                                                                                                                                                                                                                                                                                                                                                                                                                                                                                                                       |
| Keywords:                                                                                                                                                                                         | EPIDEMIOLOGY, PUBLIC HEALTH, SOCIAL MEDICINE                                                                                                                                                                                                                                                                                                                                                                                                                                                                                                                                                            |
| <p>Note: The following files were submitted by the author for peer review, but cannot be converted to PDF. You must view these files (e.g. movies) online.</p> <p>1970-2005_adj_animation.gif</p> |                                                                                                                                                                                                                                                                                                                                                                                                                                                                                                                                                                                                         |

SCHOLARONE™  
Manuscripts

1  
2  
3  
4  
5 1 **Social and geographic inequalities in premature adult mortality in Japan: an**  
6  
7  
8 2 **observational study from 1970 to 2005**  
9

10 3 Etsuji Suzuki, Saori Kashima, Ichiro Kawachi, S V Subramanian  
11  
12

13  
14  
15  
16 5 Department of Epidemiology, Okayama University Graduate School of Medicine,  
17  
18 6 Dentistry and Pharmaceutical Sciences, 2-5-1 Shikata-cho, Kita-ku, Okayama  
19  
20 7 700-8558, Japan  
21  
22  
23

24  
25 8 Etsuji Suzuki *assistant professor*, Saori Kashima  
26  
27

28 9 Department of Public Health and Health Policy, Hiroshima University Graduate  
29  
30 10 School of Biomedical Sciences, 1-2-3 Kasumi, Minami-ku, Hiroshima 734-8551,  
31  
32 11 Japan  
33  
34

35  
36  
37 12 Saori Kashima *assistant professor*  
38  
39

40 13 Department of Society, Human Development, and Health, Harvard School of Public  
41  
42 14 Health, 677 Huntington Avenue, Boston, MA 02115, USA  
43  
44

45 15 Ichiro Kawachi *professor of social epidemiology and chair*, S V Subramanian  
46  
47 16 *professor of population health and geography*  
48  
49

50  
51 17 Correspondence to:  
52  
53

54 18 E Suzuki etsuji-s@cc.okayama-u.ac.jp; S V Subramanian svsubram@hsph.harvard.edu  
55  
56  
57  
58  
59  
60



1  
2  
3  
4  
5 **Abstract**  
6

7  
8 **Objectives:** To examine trends in social and geographic inequalities in all-cause  
9  
10 premature adult mortality in Japan.  
11

12  
13 **Design:** Observational study of the Vital Statistics and the Census data.  
14

15  
16 **Setting:** Japan.  
17

18  
19 **Participants:** Entire population aged 25 or older and less than 65 in 1970, 1975, 1980,  
20  
21 1985, 1990, 1995, 2000, and 2005. The total number of decedents was 984,022 and  
22  
23 532,223 in men and women, respectively.  
24  
25

26  
27 **Main outcome measures:** For each sex, odds ratios (ORs) and 95% confidence  
28  
29 intervals (CIs) for mortality were estimated by using multilevel logistic regression  
30  
31 models with “cells” (cross-tabulated by age and occupation) at level 1, eight years at  
32  
33 level 2, and 47 prefectures at level 3. The prefecture-level variance was used as an  
34  
35 estimate of geographic inequalities of mortality.  
36  
37

38  
39 **Results:** Adjusting for age and time-trends, compared with production process and  
40  
41 related workers, ORs ranged from 0.97 (95% CI 0.96 to 0.98) among administrative  
42  
43 and managerial workers to 2.22 (2.19 to 2.24) among service workers in men. By  
44  
45 contrast, in women, the lowest odds for mortality was observed among production  
46  
47 process and related workers (reference) while the highest OR was 12.22 (11.40 to  
48  
49  
50  
51  
52  
53  
54  
55  
56  
57  
58  
59  
60

1  
2  
3  
4  
5 1 13.10) among security workers. The degree of occupational inequality increased in  
6  
7  
8 2 both sexes. Higher occupational groups did not experience reductions in mortality  
9  
10  
11 3 throughout the period and was overtaken by lower occupational groups in the early  
12  
13 4 1990s, among men. Conditional on individual age and occupation, overall geographic  
14  
15  
16 5 inequality of mortality were relatively small in both sexes; the ORs ranged from 0.87  
17  
18  
19 6 (Okinawa) to 1.13 (Aomori) for men and from 0.84 (Kanagawa) to 1.11 (Kagoshima)  
20  
21  
22 7 for women, even though there is a suggestion of increasing inequalities across  
23  
24  
25 8 prefectures since 1995 in both sexes.  
26  
27

28 9 **Conclusions:** The present findings suggest that both social and geographic inequalities  
29  
30  
31 10 in all-cause mortality have increased in Japan during the last three decades.  
32  
33  
34 11

## 35 36 37 12 **Article summary**

### 38 39 13 **Article focus:**

40  
41  
42 14 While Japan enjoys the highest average life expectancy in the world, less has been  
43  
44  
45 15 documented on the trends and patterns of health inequalities within the nation.  
46  
47

48 16 We examined trends in social and geographic inequalities in all-cause premature adult  
49  
50  
51 17 mortality from 1970 through 2005.  
52  
53

### 54 18 **Key messages:** 55 56 57 58 59 60

1 This is the first study that simultaneously examines time trends in premature mortality  
2 by occupational class as well as geographic locality, and the results of our study  
3 indicate that health disparities have widened during the decades following the collapse  
4 of the asset bubble in the early 1990s.

5 Given the multiple challenges that threaten to further dampen economic activity of the  
6 nation, it is imperative to continue to monitor future trends in health inequalities in  
7 order to avert the potential impacts on Japan's health security.

8 **Strengths and limitations of this study:**

9 The data are census based and cover the whole of Japan from 1970 through 2005.

10 This study uses multilevel methods to properly adjust for micro- and macro-level bias  
11 simultaneously.

12 We lacked information on whether the individuals were in standard jobs or precarious  
13 jobs, and a possibility of measurement error in occupation at the time of death cannot  
14 be ruled out.

## 1 INTRODUCTION

2 The postwar Constitution (1946) of Japan made equality a primary objective of the  
3 health system, and by 1961, the country achieved universal and compulsory health  
4 insurance coverage.<sup>1</sup> Although Japanese longevity was well below that of most  
5 European countries in 1960, subsequent health gains enabled the country to overtake  
6 other nations to the point where Japan reached the top of the national life expectancy  
7 rankings by 1985.<sup>12</sup> During the period of rapid economic growth (mid-1960s to 1989),  
8 Japan's social and economic policies helped to create a broad middle class with secure  
9 (often life-long) employment and comparatively egalitarian growth in living standards  
10 across the income spectrum.<sup>13</sup> Following the collapse of the asset bubble in the early  
11 1990s, however, Japan's economy has been characterized by persistently low growth  
12 accompanied by a marked increase in the number of precarious workers (i.e.,  
13 non-standard jobs such as part-time and contingent workers), from 1 in 5 employees in  
14 the 1990s to 1 in 3 employees by 2005.<sup>4</sup> The period since the collapse of the asset  
15 bubble – now referred to as the “Lost Two Decades” – has been characterized by a  
16 widening of income disparities and the emergence of a new class of “working poor”  
17 hitherto unrecognized in Japanese society.<sup>5</sup> In retrospect, the post-War period of  
18 comparatively egalitarian economic growth appears to have lasted about forty years,

1 and today, Japan ranks closer to countries such as the United States and the UK in  
2 terms of indicators of relative poverty, such as poverty rate and poverty gap.<sup>6</sup>

3 While there are considerable studies documenting social and geographic  
4 inequalities in mortality in other industrialized countries,<sup>7-12</sup> we are not aware of a  
5 similar comprehensive assessment of the trends in health inequalities in Japan that may  
6 have accompanied the major macroeconomic changes.<sup>13</sup> In this study, by using  
7 occupations as an indicator of socioeconomic position,<sup>14</sup> we examine the trends in  
8 occupational and geographic inequalities of all-cause premature adult mortality from  
9 1970 through 2005. Since premature adult mortality focuses on death occurring at  
10 younger ages, they constitute a useful measure in public health as well as preventive  
11 medicine.<sup>15</sup>

## 13 METHODS

### 14 Data

15 Data on deaths were obtained from the *Report of Vital Statistics: Occupational and*  
16 *Industrial Aspects*,<sup>16</sup> which has been conducted by the Ministry of Health, Labour and  
17 Welfare every five years since 1970, coinciding with the years of the Population  
18 Census. The latest year for which data are available is 2005. In the notification of

1  
2  
3  
4  
5 1 deaths, the respondents are asked to fill in the occupation of decedent at the time of  
6  
7  
8 2 death,<sup>17</sup> and one of the following persons is obliged to submit the notification: (1)  
9  
10 3 relatives who live together with decedents, (2) other housemates, (3) landlord, estate  
11  
12 4 owner, land/house agent, or (4) relatives who do not live together with decedents. The  
13  
14 5 occupation at the time of death is recorded for each decedent following the Japan  
15  
16 6 Standard Occupational Classification.<sup>18</sup> During the follow-up period, the occupational  
17  
18 7 classification scheme underwent four revisions (Supplementary Table 1).<sup>18</sup> In this study,  
19  
20 8 we used the fourth revision of the Occupational Classification, which includes the  
21  
22 9 following 11 groups<sup>18</sup>: (1) specialist and technical workers, (2) administrative and  
23  
24 10 managerial workers, (3) clerical workers, (4) sales workers, (5) service workers, (6)  
25  
26 11 security workers, (7) agriculture, forestry and fishery workers, (8) transport and  
27  
28 12 communication workers, (9) production process and related workers, (10) workers not  
29  
30 13 classifiable by occupation, and (11) non-employed. (The full description of each  
31  
32 14 occupational group is available on-line in English.<sup>18</sup>) Note that the group “production  
33  
34 15 process and related workers” includes mining workers. Note also that the group  
35  
36 16 “non-employed” includes the unemployed as well as non-labor force (e.g.,  
37  
38 17 home-makers, students, and the retired). Although the Census distinguishes the  
39  
40 18 unemployed from home-makers, the vital records combine these categories as  
41  
42  
43  
44  
45  
46  
47  
48  
49  
50  
51  
52  
53  
54  
55  
56  
57  
58  
59  
60

1 “non-employed.” We restricted the analysis to those who are aged 25 or older and less  
2 than 65 to exclude students as well as the retired. The total number of decedents was  
3 984,022 and 532,223 in men and women, respectively (Supplementary Figure 1 and  
4 Supplementary Table 2).

5 Denominator data for the calculation of mortality rates were obtained from the  
6 Population Census which has been conducted by the Ministry of Internal Affairs and  
7 Communications every five years since 1920.<sup>19</sup> In the questionnaire for the Census, the  
8 occupation was assessed by asking a following question<sup>19</sup>: “Description of work –  
9 Describe in detail the duties you are assigned to perform.” The questionnaires are  
10 delivered to each household, and someone in each household answers the question. We  
11 used “production process and related workers” as the referent category since they were  
12 the largest occupational category in a majority of the time periods (Supplementary  
13 Table 3).

#### 14 **Analysis**

15 The data had a three-level multilevel structure of 32,590 cells for men and 32,542 cells  
16 for women at level 1, nested within eight years at level 2, nested within 47 prefectures  
17 at level 3. The eight years comprised of 1970, 1975, 1980, 1985, 1990, 1995, 2000, and  
18 2005. Each year had a maximum 88 cells (eight age groups times 11 occupational

1 groups) (Supplementary Table 4). Note that the numbers of deaths for each cell are  
2 recorded during one fiscal year. For the descriptive purpose, we first calculated  
3 age-adjusted mortality rates by occupational class by year and sex (Supplementary  
4 Table 5). We used the direct method, using the model population of 1985 as a  
5 reference.<sup>20</sup> The model population of 1985 is based on the Japanese population under  
6 census of 1985 and it is created on the basis of 1,000 persons as 1 unit, after adjusting  
7 radical increase or decrease such as baby boom.<sup>21</sup> We then employed multilevel  
8 statistical procedures because of their ability to model complex variance structures at  
9 multiple levels.<sup>22</sup> In the present analysis, they allow estimation of the relationship  
10 between mortality and occupation, conditional on individual age variation (“fixed  
11 parameters”) and year- and prefecture-level variations (“random parameters”). They  
12 also enable an estimation of the extent to which the relationship between mortality and  
13 occupation varies across years and prefectures (random parameters) and the degree to  
14 which prefecture-level socioeconomic status explains this variation (fixed parameters).  
15 The unit of analysis was “cells,” and our models were structurally identical to models  
16 with individuals at level 1.<sup>23</sup>

17       The response variable, proportion of deaths in each cell, was modeled with  
18 allowances made for the varying denominator in each cell. The fixed and random



1 parameter estimates (along with their standard errors) for the multilevel binomial logit  
2 link model were calibrated using predictive/penalized quasi-likelihood procedures with  
3 second order Taylor series expansion, as implemented within the MLwiN 2.22.<sup>24</sup>  
4 Results are presented as odds ratios (ORs) and 95% confidence intervals (CIs). A *p*  
5 value of less than 0.05 (two-sided test) was considered statistically significant.

6 First, we conducted three-level analysis as an overall model, with cells at level  
7 1, years at level 2, and prefectures at level 3. The prefecture-level variance was used as  
8 an estimate of geographic inequalities of mortality. Prefectures were ranked by ORs  
9 having the whole country of Japan as reference (value = 1), and uncertainty was  
10 estimated by 95% CIs. Further, to examine the temporal patterns of occupational and  
11 geographic inequality of mortality across years, we also conducted two-level analysis,  
12 with cells at level 1 and prefectures at level 2 separately for each year.

13 Then, to explore the temporal change of occupational inequality, we ran a  
14 three-level multilevel model including a fixed cross-level interaction effect between  
15 the 11 occupations (at level 1) and year (at level 2). In this analysis, we modeled the  
16 year as a continuous variable, and we calculated mean predicted probabilities for  
17 mortality among those aged 25 to 29 (referent category).

18 To present the results of geographic inequality in all-cause mortality, we

1  
2  
3  
4  
5 1 created maps showing prefecture-level residuals by using the ArcGIS (ESRI Japan Inc.,  
6  
7  
8 2 version 9.3).  
9

## 10 3 11 12 13 4 **RESULTS**

### 14 5 **Social inequality of mortality**

15  
16  
17 6 Table 1 shows the results of social inequality of all-cause premature mortality in terms  
18  
19  
20  
21  
22 7 of occupation from overall model as well as year-specific models in multilevel  
23  
24  
25 8 analyses. Excluding workers not classifiable by occupation and non-employed, there  
26  
27  
28 9 were substantial health disparities by occupations in both sexes. Adjusting for age and  
29  
30  
31 10 time-trends in the overall model, compared with production process and related  
32  
33  
34 11 workers, ORs ranged from 0.97 (95% CI 0.96 to 0.98) among administrative and  
35  
36  
37 12 managerial workers to 2.22 (95% CI 2.19 to 2.24) among service workers in men.  
38  
39  
40 13 Among women, the lowest odds for mortality was observed among production process  
41  
42  
43 14 and related workers (reference) while the highest OR was 12.22 (95% CI 11.40 to  
44  
45  
46 15 13.10) among security workers.

47  
48 16 The degree of occupational inequality increased in both sexes. Among men, in  
49  
50  
51 17 1970, the lowest OR was 0.54 (95% CI 0.53 to 0.56) among administrative and  
52  
53  
54 18 managerial workers while the highest OR was 1.34 (95% CI 1.32 to 1.37) among  
55  
56  
57  
58  
59  
60

1  
2  
3  
4  
5 1 agriculture, forestry and fishery workers. In 2005, however, the lowest odds for  
6  
7  
8 2 mortality was observed among production process and related workers (reference)  
9  
10  
11 3 whereas the highest OR was 3.97 (95% CI 3.84 to 4.11) among service workers.  
12  
13  
14 4 Among women, the lowest odds for mortality was observed among production process  
15  
16  
17 5 and related workers (reference) throughout the follow-up period, and the highest ORs  
18  
19  
20 6 in 1970 and 2005 were 11.43 (95% CI 9.14 to 14.29) and 16.25 (95% CI 13.65 to  
21  
22 7 19.34), respectively, among security workers.  
23  
24

25 8 The widening social inequalities can be more clearly seen in Figures 1 and 2,  
26  
27  
28 9 which show the temporal pattern of these occupational inequalities across years. We  
29  
30  
31 10 excluded workers not classifiable by occupation and non-employed from these Figures  
32  
33  
34 11 to enhance readability although they were included in the analysis. Among men, the  
35  
36  
37 12 mortality risk among three occupations (specialist and technical workers,  
38  
39  
40 13 administrative and managerial workers, and service workers) remained unchanged,  
41  
42  
43 14 whereas those of other occupational groups declined more or less. Especially, in  
44  
45  
46 15 addition to the workers not classifiable by occupation, three occupations (clerical  
47  
48  
49 16 workers, sales workers, and product process and related workers) experienced a  
50  
51  
52 17 considerable decline in mortality risk between 1970 and 2005.  
53

54 18 By contrast, trends in mortality by occupational groups were more stable for  
55  
56  
57  
58  
59  
60

1 women. Most occupations experienced the comparable trajectories during the period  
2 although administrative and managerial workers experienced relatively small declines  
3 in mortality risk. Specialist and technical workers and service workers also  
4 experienced declines in mortality risk among women although they remained on a  
5 plateau among men.

### 6 **Geographic inequality of mortality**

7 Conditional on individual age and occupation, overall geographic inequality of  
8 mortality were relatively small across prefectures in both sexes, with slightly larger  
9 geographic inequality among women than men (Table 2). Note that Tables 1 and 2 are  
10 based on the same multilevel models, showing the results of fixed and random parts,  
11 respectively. Prefecture-specific ORs ranged from 0.87 (Okinawa prefecture) to 1.13  
12 (Aomori prefecture) for men and from 0.84 (Kanagawa prefecture) to 1.11 (Kagoshima  
13 prefecture) for women (Supplementary Tables 6 and 7). Figure 3 shows the results of  
14 geographic inequalities in mortality. We observed similar patterns in both sexes  
15 although they led to opposite results between the sexes in Akita and Fukui prefectures;  
16 in Akita, the mortality risk was higher in men whereas it was lower in women. In Fukui,  
17 however, the pattern was reversed.

18 Although overall geographic inequalities of mortality were relatively small,

1 they appear to have increased over time (Table 2). In men, although prefecture-level  
2 variance was less pronounced until 1990 (around 0.003 on logit scale), it began to  
3 increase since 1995 steadily to 0.011 in 2005. By contrast, in women the  
4 prefecture-level variance (on logit scale) was 0.007 in 1970s, and it declined to 0.004  
5 in 1990, and then increased up to 0.012 in 2005. The adjusted ORs and 95% CIs for  
6 mortality in each prefecture across years are shown in Supplementary Tables 6 and 7.  
7 In 1970, ORs ranged from 0.89 (Gifu prefecture) to 1.12 (Akita prefecture) for men  
8 and from 0.79 (Tokyo) to 1.14 (Kagoshima prefecture) for women. In 2005, the ranges  
9 were widened, and ORs ranged from 0.81 (Nara prefecture) to 1.27 (Aomori  
10 prefecture) for men and from 0.75 (Nara prefecture) to 1.18 (Kochi prefecture) for  
11 women. We show geographic and temporal variation in mortality, suggesting an  
12 increase in geographic inequalities across prefectures since 1995 in both sexes  
13 (Supplementary Figures 2 and 3 and Video).

#### 14 **Supplementary analyses**

15 We examined two additional issues to further explore the occupational and  
16 geographic inequalities in premature mortality; (i) the patterns of geographic  
17 inequalities in mortality by occupations, and (ii) the presence of contextual effects of  
18 prefecture-level socioeconomic status on mortality risk (Supplementary Text,

1  
2  
3  
4  
5 1 Supplementary Figures 4 and 5, Supplementary Tables 8 to 10).  
6  
7  
8 2  
9

## 10 3 **DISCUSSION**

### 11 4 **Summary of findings**

12  
13  
14  
15  
16 5 The findings of the present study suggest that the economic trends during the past 35  
17  
18  
19  
20 6 years have been accompanied by a widening of health inequalities between  
21  
22  
23 7 occupational classes as well as geographic areas of the country. The post-bubble  
24  
25  
26 8 economy has been characterized by lackluster growth combined with a dramatic shift  
27  
28  
29 9 in the work-force away from life-long employment towards more precarious  
30  
31 10 employment.<sup>4</sup> This economic restructuring has increased pressure on workers in  
32  
33  
34 11 managerial and professional workers (primarily men) who are being squeezed to raise  
35  
36  
37 12 their productivity. The changing pattern of health inequalities across occupational  
38  
39  
40 13 groups is consistent with this interpretation, i.e., the stalled decline in premature  
41  
42  
43 14 mortality among white collar workers relative to other occupational classes.  
44

### 45 15 **Comparison with other studies**

46  
47  
48 16 The present findings suggest that the health effects of the changing economic  
49  
50  
51 17 conditions depend on individual's socioeconomic circumstances. A previous study in  
52  
53  
54 18 Japan demonstrated that, although self-rated health improved for both sexes throughout  
55  
56  
57  
58  
59  
60

1  
2  
3  
4  
5 1 the economic crisis of the 1990s, health disparities in relation to occupations widened,  
6  
7  
8 2 especially among men.<sup>25</sup> They also reported that middle-class male workers and female  
9  
10  
11 3 homemakers seemed to be particularly adversely affected by the crisis.<sup>25</sup> The present  
12  
13  
14 4 study, however, provides a different pattern of widening health disparities in both sexes.  
15  
16  
17 5 For men, absolute health status improvement was observed only among some lower  
18  
19  
20 6 occupational groups (e.g., production process and related workers, sales workers, and  
21  
22  
23 7 clerical workers), whereas higher occupational classes (e.g., specialist and technical  
24  
25  
26 8 workers and administrative and managerial workers) apparently obtained no benefit  
27  
28  
29 9 throughout the period. Indeed, although they were advantaged with regard to mortality  
30  
31  
32 10 risk in 1970s and 1980s, they were overtaken in the 1990s by those in lower  
33  
34  
35 11 occupational classes who benefited more during the same period. Of note, this  
36  
37  
38 12 “cross-over” almost coincided with the collapse of the economic bubble in the early  
39  
40  
41 13 1990s. We note at the same time that neither male service workers nor agricultural,  
42  
43  
44 14 forestry and fishery workers experienced improvements in premature mortality  
45  
46  
47 15 throughout the period.

48  
49 16 By contrast, for women, we observe that absolute health status improved  
50  
51  
52 17 roughly to the same extent across occupational groups, and that changes in ranking  
53  
54  
55 18 were less pronounced in women compared to men. We should note that relatively few  
56  
57  
58  
59  
60

1 women were represented in the three occupational groups with higher risk of mortality  
2 (i.e., administrative and managerial workers, security workers, and transport and  
3 communication workers). Even excluding these occupational groups, however, health  
4 inequalities appeared to have increased in women. These findings may be explained by  
5 differences between men and women according to the type of work and industrial  
6 sector of employment. Men are more likely to be engaged in work in the private sector  
7 as well as in parts of the economy that are more vulnerable to economic downturns  
8 (such as finance and business services, manufacturing, construction).<sup>26</sup>

### 9 **Potential mechanisms of social inequalities in mortality**

10 The present findings provide a marked contrast to the evolution of health inequalities  
11 described in other industrialized countries. In industrialized western European and  
12 north American countries, health status typically follows a hierarchical pattern: i.e., the  
13 lower the socioeconomic position, the worse the health status.<sup>5 8 10 11</sup> We show that this  
14 “typical” pattern of health inequalities does not necessarily apply to Japan. In contrast  
15 to Western countries, previous studies in Japan have yielded inconsistent results with  
16 regard to the relationship between socioeconomic status and health outcomes, and  
17 lower non-manual or manual workers do not necessarily exhibit less healthy behaviors  
18 compared with those in higher occupational classes.<sup>27-32</sup> Nevertheless, a recent study of



1 a nationally representative sample in 2001 showed that men in lower occupational  
2 classes, such as service work, transportation, and labor work, were significantly more  
3 likely to engage in health risk behaviors compared with professional workers.<sup>33</sup> They  
4 also showed that there is a cumulation of risky behaviors in lower female occupational  
5 classes.<sup>33</sup> Further, another cross-sectional study in Japan demonstrated that occupation  
6 was not significantly associated with psychological distress among men or women by  
7 using a nationally representative sample in 2007.<sup>34</sup> Thus, the pattern of health  
8 inequalities in the present analysis is not consistent with occupational class differences  
9 in health behaviors or psychosocial stress.

10 As a possible explanation for the present findings, we note that  
11 occupation-based socioeconomic position may reflect social networks,<sup>14</sup> which enables  
12 its members to access a wide variety of resources. In this respect, recent research from  
13 Japan has emphasized the evaluation of social capital as well as social networks in the  
14 workplace to explain variations in workers' health.<sup>35-37</sup> We thus hypothesized a  
15 posteriori that, following the collapse of the economic bubble, workers of higher  
16 occupational classes were more likely to experience a breakdown of social cohesion  
17 within companies, which could cancel out the potential positive benefits among them.  
18 We also note that there is a possibility that the "compositions" of each occupational

1 group went through a (substantial) change throughout the study period, which might  
2 have led to different patterns of occupational hazards, especially among lower  
3 occupational groups. In other words, there is a possibility that work environment have  
4 improved markedly among them throughout the study period, which now requires less  
5 labor load. Finally, a possibility of healthy worker effect cannot be ruled out among  
6 some lower occupational groups. This could be induced by the following two  
7 processes; (i) healthy people might have selectively entered these occupations, and (ii)  
8 unhealthy workers might have selectively exited these occupations. Further studies are  
9 warranted to examine these possible explanations of the present findings.<sup>38</sup>

10           It is worth mentioning that typical occupational hierarchy does not necessarily  
11 apply to the occupation (major group) of the Japan Standard Occupational  
12 Classification. Indeed, there is inherently more ambiguity in the ranking of occupations,  
13 compared with education and income.<sup>39</sup> In addition, as noted by Galobardes et al.,<sup>14</sup> the  
14 decrease in manual occupations with concomitant increase in low-level service  
15 occupations has altered the stratification that occupation generates in terms of  
16 socioeconomic position, and so classification such as manual and non-manual worker  
17 may lose some of their meaning in economies which include a large number of  
18 low-paid, non-manual service jobs. Importantly, the occupational classification in the

1 present study yields reasonably consistent occupational grouping throughout the study  
2 period, and each group has a reasonably large data. We therefore examined the time  
3 trend of social inequalities by using the finest occupational classification available in  
4 the Census. By using a fairly detailed occupational classification, it is likely that we  
5 could adjust for other omitted compositional variables (e.g., education), to the extent  
6 that the cross-tabulation of age and occupation correlate with them.

### 7 **Geographic and temporal variation in mortality**

8 By applying the novel multilevel methods, the present study shows that geographic  
9 inequalities in premature mortality have also widened since 1995. In an ecological  
10 study, Fukuda et al.<sup>40</sup> assessed the time trend of geographic health inequality in Japan,  
11 by examining the association of life expectancy and age-adjusted mortality with per  
12 capita income of prefectures and municipalities. While excluding Okinawa prefecture  
13 from the analyses, they found a possible increase in geographic health inequalities  
14 from 1995 to 2000, following a decrease from 1955 to 1995.<sup>40</sup> Note that the present  
15 study examined geographic inequalities, conditional on individual age and occupation.  
16 The present findings thus provide suggestive evidence of “common ecologic effects”  
17 of place where people live,<sup>41</sup> although we should note that the seemingly ecologic  
18 effects might be due to an omitted compositional effect (e.g., income). Broadly

1 speaking, since 1995, higher mortality risk has been consistently observed in the  
2 northeastern region in the main island (Tohoku region) for both sexes. Overall, the  
3 economic conditions of the predominantly rural areas in the region may be  
4 characterized by population decline, population aging, and lower per capita income.<sup>19</sup>

5 <sup>42</sup> Notably, however, not all rural prefectures have undergone the same transition;  
6 indeed some rural prefectures (such as Nara and Okayama) had moved up through the  
7 ranks as having significantly lower mortality for both sexes in 2005. In the  
8 supplementary analysis, no clear associations were found with prefecture-level  
9 socioeconomic variables, and it remains unknown what contributed to these distinct  
10 patterns. These patterns deserve further attention in future studies.

### 11 **Limitations of the study**

12 There are some limitations of our analysis. First, although we were able to conduct a  
13 fairly detailed analysis of trends by using occupations to measure certain aspects of  
14 socioeconomic position, neither the status in employment nor the predominant type of  
15 employment contract was available, and in particular, we lacked information on  
16 whether the individuals were in standard jobs or precarious jobs. Given the  
17 conspicuous increase in the proportion of the labor force engaged in non-standard  
18 work,<sup>4</sup> as well as mounting evidence that precarious work is associated with worse

1 health,<sup>43</sup> future work needs to examine whether the changing character of the  
2 workforce in Japan is contributing to widening health inequalities. The use of more  
3 detailed indicators of socioeconomic position would provide further insight into the  
4 social inequalities of health. Indeed, greater attention to the theoretical as well as  
5 empirical aspects of measurement of socioeconomic position will likely enhance the  
6 rigor of research on occupational health inequalities, which would increase the  
7 possibility for meaningfully comparing results across studies.<sup>44</sup>

8         Second, occupation at the time of death was used in our numerator data,  
9 which may not necessarily reflect the individual's life-course socioeconomic  
10 position.<sup>44 45</sup> If unhealthy workers selectively exited some occupations, this would have  
11 led to an under-estimation of mortality in those sectors. The proportion of agricultural  
12 workers significantly decreased during the study period for both sexes, as well as that  
13 of administrative and managerial workers (for men). However, this may reflect real  
14 trends in the work-force.

15         Third, considering the possible discrepancies of the respondents on the two  
16 occasions (i.e., the notification of deaths and the census), we should note the potential  
17 for numerator denominator bias between the two sources of information. In particular,  
18 the possibility of measurement error in occupation at the time of death cannot be ruled

1 out – the person recording the notification of deaths may either promotes the deceased  
2 to a higher status job or demotes them because the respondents did not know the  
3 details of the deceased’s job. Indeed, rapid changes in the occupational structure of  
4 Japan could give plausibility to the extremely large odds ratios resulting from the  
5 potential for numerator denominator bias.

6 Fourth, the smallest geographic unit available was the prefecture (of which  
7 there are 47), and we could not explore geographic inequalities in finer detail. However,  
8 the prefecture may be a useful and valid unit of analysis since it is the unit that has  
9 direct administrative authority in the economic, education, and health sectors.<sup>1</sup>  
10 Furthermore, the prefecture has specific jurisdiction over health centers, which is the  
11 locus of preventive health care activity in Japan.<sup>1</sup> Note also that the boundaries  
12 between prefectures have not changed since the Meiji Restoration (1867), enabling  
13 long-term analysis.<sup>1</sup> Since previous studies demonstrated that the choice of geographic  
14 units as well as area-based measures is critical in the investigation of geographic  
15 inequalities,<sup>46 47</sup> these issues warrant further examination.

## 16 **Conclusions**

17 **Despite several limitations associated with the use of secondary data,** the present  
18 findings **indicate** that both social and geographic inequalities in premature adult

1 mortality have increased during Japan's "Lost Two Decades" following the collapse of  
2 the asset bubble. As a nation, Japan must grapple with the triple demographic trends of  
3 declining fertility, population aging, and overall population decline. These trends  
4 threaten to further dampen economic activity, escalating the load on the social security  
5 system. In addition, Japan now faces multiple challenges in the wake of the earthquake  
6 and tsunami on March 11, 2011, and this may further place downward momentum on  
7 the nation's struggling economy. Given these momentous challenges, it is imperative to  
8 continue to monitor future trends in health inequalities in order to avert the potential  
9 impacts on Japan's health security.

## References

1. Hasegawa T. Japan: Historical and current dimensions of health and health equity. In: Evans T, Whitehead M, Diderichsen F, Bhuiya A, Wirth M, editors. *Challenging Inequities in Health: From Ethics to Action*. New York, NY: Oxford University Press, 2001:90-103.
2. Marmot MG, Davey Smith G. Why are the Japanese living longer? *BMJ* 1989;299:1547-51.
3. Bezruchka S, Namekata T, Siström MG. Interplay of politics and law to promote health: improving economic equality and health: the case of postwar Japan. *Am J Public Health* 2008;98:589-94.
4. Ministry of Internal Affairs and Communications. Labour Force Survey. <http://www.stat.go.jp/english/data/roudou/index.htm>.
5. Kagamimori S, Gaina A, Naser Moaddeli A. Socioeconomic status and health in the Japanese population. *Soc Sci Med* 2009;68:2152-60.
6. OECD. *OECD Factbook 2010: Economic, Environmental and Social Statistics*: OECD Publishing.
7. Friel S, Marmot MG. Action on the social determinants of health and health inequities goes global. *Annu Rev Public Health* 2011;32:225-36.



- 1  
2  
3  
4  
5 1 8. Braveman P, Egerter S, Williams DR. The social determinants of health: coming of  
6  
7  
8 2 age. *Annu Rev Public Health* 2011;32:381-98.  
9  
10  
11 3 9. Thomas B, Dorling D, Davey Smith G. Inequalities in premature mortality in  
12  
13 4 Britain: Observational study from 1921 to 2007. *BMJ* 2010;341:c3639.  
14  
15  
16 5 10. Mackenbach JP, Stirbu I, Roskam AJ, Schaap MM, Menvielle G, Leinsalu M, et al.  
17  
18  
19 6 Socioeconomic inequalities in health in 22 European countries. *N Engl J Med*  
20  
21 7 2008;358:2468-81.  
22  
23  
24 8 11. Krieger N, Rehkopf DH, Chen JT, Waterman PD, Marcelli E, Kennedy M. The fall  
25  
26 9 and rise of US inequities in premature mortality: 1960-2002. *PLoS Med*  
27  
28 10 2008;5:e46. doi:10.1371/journal.pmed.0050046.  
29  
30  
31  
32  
33 11 12. Davey Smith G, Krieger N. Tackling health inequities. *BMJ* 2008;337:a1526.  
34  
35  
36 12 13. Catalano R, Goldman-Mellor S, Saxton K, Margerison-Zilko C, Subbaraman M,  
37  
38  
39 13 Lewinn K, et al. The health effects of economic decline. *Annu Rev Public Health*  
40  
41 14 2011;32:431-50.  
42  
43  
44 15 14. Galobardes B, Shaw M, Lawlor DA, Davey Smith G, Lynch J. Indicators of  
45  
46 16 socioeconomic position. In: Oakes JM, Kaufman JS, editors. *Methods in Social*  
47  
48 17 *Epidemiology*. San Francisco, CA: Jossey-Bass, 2006:47-85.  
49  
50  
51  
52  
53 18 15. Rajaratnam JK, Marcus JR, Levin-Rector A, Chalupka AN, Wang H, Dwyer L, et  
54  
55  
56  
57  
58  
59  
60

- 1  
2  
3  
4  
5 1 al. Worldwide mortality in men and women aged 15-59 years from 1970 to 2010: a  
6  
7  
8 2 systematic analysis. *Lancet* 2010;375:1704-20.  
9  
10  
11 3 16. Ministry of Health, Labour and Welfare. Overview Report of Vital Statistics in FY  
12  
13 4 2005: Occupational and Industrial Aspects  
14  
15  
16 5 <http://www.mhlw.go.jp/english/database/db-hw/orvf/index.html>.  
17  
18  
19 6 17. Ministry of Health, Labour and Welfare. Outline of Vital Statistics in Japan.  
20  
21  
22 7 <http://www.mhlw.go.jp/english/database/db-hw/outline/index.html>.  
23  
24  
25 8 18. Ministry of Internal Affairs and Communications. Japan Standard Occupational  
26  
27  
28 9 Classification. <http://www.stat.go.jp/english/index/seido/shokgyou/index-co.htm>.  
29  
30  
31 10 19. Ministry of Internal Affairs and Communications. Population Census.  
32  
33  
34 11 <http://www.stat.go.jp/english/data/kokusei/index.htm>.  
35  
36  
37 12 20. Ministry of Health, Labour and Welfare. Vital Statistics.  
38  
39  
40 13 <http://www.mhlw.go.jp/toukei/list/81-1a.html> (in Japanese).  
41  
42  
43 14 21. Ministry of Health, Labour and Welfare. Handbook of Health and Welfare Statistics  
44  
45  
46 15 2010. <http://www.mhlw.go.jp/english/database/db-hh/>.  
47  
48  
49 16 22. Raudenbush SW, Bryk AS. *Hierarchical Linear Models: Applications and Data*  
50  
51  
52 17 *Analysis Methods*. 2nd ed. Thousand Oaks, CA: Sage Publications, 2002.  
53  
54  
55 18 23. Subramanian SV, Duncan C, Jones K. Multilevel perspectives on modeling census  
56  
57  
58  
59  
60

- 1 data. *Environ Plann A* 2001;33:399-417.
- 2 24. MLwiN Version 2.22 [program]: Centre for Multilevel Modelling, University of  
3 Bristol, 2010.
- 4 25. Kondo N, Subramanian SV, Kawachi I, Takeda Y, Yamagata Z. Economic recession  
5 and health inequalities in Japan: analysis with a national sample, 1986-2001. *J*  
6 *Epidemiol Community Health* 2008;62:869-75.
- 7 26. Riva M, Bambra C, Easton S, Curtis S. Hard times or good times? Inequalities in  
8 the health effects of economic change. *Int J Public Health* 2011;56:3-5.
- 9 27. Kagamimori S, Kitagawa T, Nasermoaddeli A, Wang H, Kanayama H, Sekine M,  
10 et al. Differences in mortality rates due to major specific causes between Japanese  
11 male occupational groups over a recent 30-year period. *Ind Health*  
12 2004;42:328-35.
- 13 28. Lahelma E, Lallukka T, Laaksonen M, Martikainen P, Rahkonen O, Chandola T, et  
14 al. Social class differences in health behaviours among employees from Britain,  
15 Finland and Japan: the influence of psychosocial factors. *Health Place*  
16 2010;16:61-70.
- 17 29. Fukuda Y, Nakamura K, Takano T. Socioeconomic pattern of smoking in Japan:  
18 income inequality and gender and age differences. *Ann Epidemiol* 2005;15:365-72.

- 1  
2  
3  
4  
5 1 30. Nishi N, Makino K, Fukuda H, Tatara K. Effects of socioeconomic indicators on  
6  
7  
8 2 coronary risk factors, self-rated health and psychological well-being among urban  
9  
10 3 Japanese civil servants. *Soc Sci Med* 2004;58:1159-70.  
11  
12  
13 4 31. Takao S, Kawakami N, Ohtsu T. Occupational class and physical activity among  
14  
15 5 Japanese employees. *Soc Sci Med* 2003;57:2281-9.  
16  
17  
18 6 32. Martikainen P, Ishizaki M, Marmot MG, Nakagawa H, Kagamimori S.  
19  
20 7 Socioeconomic differences in behavioural and biological risk factors: a comparison  
21  
22 8 of a Japanese and an English cohort of employed men. *Int J Epidemiol*  
23  
24 9 2001;30:833-8.  
25  
26  
27 10 33. Fukuda Y, Nakamura K, Takano T. Accumulation of health risk behaviours is  
28  
29 11 associated with lower socioeconomic status and women's urban residence: a  
30  
31 12 multilevel analysis in Japan. *BMC Public Health* 2005;5:53.  
32  
33 13 doi:10.1186/1471-2458-5-53.  
34  
35  
36 14 34. Inoue A, Kawakami N, Tsuchiya M, Sakurai K, Hashimoto H. Association of  
37  
38 15 occupation, employment contract, and company size with mental health in a  
39  
40 16 national representative sample of employees in Japan. *J Occup Health*  
41  
42 17 2010;52:227-40.  
43  
44  
45 18 35. Suzuki E, Takao S, Subramanian SV, Doi H, Kawachi I. Work-based social  
46  
47  
48  
49  
50  
51  
52  
53  
54  
55  
56  
57  
58  
59  
60

- 1  
2  
3  
4  
5 1 networks and health status among Japanese employees. *J Epidemiol Community*  
6  
7  
8 2 *Health* 2009;63:692-6.  
9  
10  
11 3 36. Suzuki E, Takao S, Subramanian SV, Komatsu H, Doi H, Kawachi I. Does low  
12  
13 4 workplace social capital have detrimental effect on workers' health? *Soc Sci Med*  
14  
15 5 2010;70:1367-72.  
16  
17  
18  
19 6 37. Suzuki E, Fujiwara T, Takao S, Subramanian SV, Yamamoto E, Kawachi I.  
20  
21 7 Multi-level, cross-sectional study of workplace social capital and smoking among  
22  
23 8 Japanese employees. *BMC Public Health* 2010;10:489.  
24  
25 9 doi:10.1186/1471-2458-10-489.  
26  
27  
28  
29  
30  
31 10 38. Suzuki E, Yamamoto E, Tsuda T. Identification of operating mediation and  
32  
33 11 mechanism in the sufficient-component cause framework. *Eur J Epidemiol*  
34  
35 12 2011;26:347-57.  
36  
37  
38  
39 13 39. Harper S, Lynch J. Measuring health inequalities. In: Oakes JM, Kaufman JS,  
40  
41 14 editors. *Methods in Social Epidemiology*. San Francisco, CA: Jossey-Bass,  
42  
43 15 2006:134-68.  
44  
45  
46  
47  
48 16 40. Fukuda Y, Nakao H, Yahata Y, Imai H. Are health inequalities increasing in Japan?  
49  
50 17 The trends of 1955 to 2000. *Biosci Trends* 2007;1:38-42.  
51  
52  
53  
54 18 41. Subramanian SV, Glymour MM, Kawachi I. Identifying causal ecologic effects on  
55  
56  
57  
58  
59  
60

- 1  
2  
3  
4  
5 1 health: A methodological assessment. In: Galea S, editor. *Macrosocial*  
6  
7  
8 2 *Determinants of Population Health*. New York, NY: Springer, 2007:301-31.  
9  
10  
11 3 42. Cabinet Office, Government of Japan. Prefectural Accounts.  
12  
13 4 [http://www.esri.cao.go.jp/jp/sna/sonota/kenmin/kenmin\\_top.html](http://www.esri.cao.go.jp/jp/sna/sonota/kenmin/kenmin_top.html) (in Japanese).  
15  
16  
17 5 43. Kim MH, Kim CY, Park JK, Kawachi I. Is precarious employment damaging to  
18  
19 6 self-rated health? Results of propensity score matching methods, using longitudinal  
20  
21 7 data in South Korea. *Soc Sci Med* 2008;67:1982-94.  
22  
23  
24  
25 8 44. Krieger N. Workers are people too: Societal aspects of occupational health  
26  
27 9 disparities – an ecosocial perspective. *Am J Ind Med* 2010;53:104-15.  
28  
29  
30  
31 10 45. Landsbergis PA. Assessing the contribution of working conditions to  
32  
33 11 socioeconomic disparities in health: a commentary. *Am J Ind Med* 2010;53:95-103.  
34  
35  
36  
37 12 46. Krieger N, Chen JT, Waterman PD, Soobader MJ, Subramanian SV, Carson R.  
38  
39 13 Geocoding and monitoring of US socioeconomic inequalities in mortality and  
40  
41 14 cancer incidence: does the choice of area-based measure and geographic level  
42  
43 15 matter?: the Public Health Disparities Geocoding Project. *Am J Epidemiol*  
44  
45 16 2002;156:471-82.  
46  
47  
48  
49  
50  
51 17 47. Reijneveld SA, Verheij RA, de Bakker DH. The impact of area deprivation on  
52  
53 18 differences in health: does the choice of the geographical classification matter? *J*  
54  
55  
56  
57  
58  
59  
60

1  
2  
3  
4  
5  
6  
7  
8  
9  
10  
11  
12  
13  
14  
15  
16  
17  
18  
19  
20  
21  
22  
23  
24  
25  
26  
27  
28  
29  
30  
31  
32  
33  
34  
35  
36  
37  
38  
39  
40  
41  
42  
43  
44  
45  
46  
47  
48  
49  
50  
51  
52  
53  
54  
55  
56  
57  
58  
59  
60

1 *Epidemiol Community Health* 2000;54:306-13.

2

3

4

For peer review only

1  
2  
3  
4  
5 1 **Acknowledgements:** The authors thank Akiko Tokinobu for her assistance with data  
6  
7  
8 2 collection.

9  
10 3 **Contributors:** SVS and ES conceived the idea and design of the study. ES led the data  
11  
12 4 collection, data analysis, interpretation of the findings, and writing of the paper. SVS  
13  
14 5 supervised the study and contributed to the interpretation of findings and writing of the  
15  
16 6 manuscript. SK contributed to the data analysis, literature review, and writing of the  
17  
18 7 manuscript. IK contributed to the interpretation of the findings and writing of the  
19  
20 8 manuscript. All authors have read and approved the final version of the manuscript.  
21  
22  
23  
24  
25  
26  
27

28 9 **Funding:** A part of this research was supported by a Grant-in-Aid for Scientific  
29  
30 10 Research, Ministry of Education, Culture, Sports, Science and Technology (MEXT),  
31  
32 11 Japan. The funding source had no role in study design, data collection, data analysis,  
33  
34 12 data interpretation, the writing of the report, or the decision to submit for publication.  
35  
36  
37  
38  
39

40 13 **Competing interests:** All authors have completed the ICMJE uniform disclosure form  
41  
42 14 at [www.icmje.org/coi\\_disclosure.pdf](http://www.icmje.org/coi_disclosure.pdf) (available on request from the corresponding  
43  
44 15 authors) and declare: SVS is supported by a Robert Wood Johnson Investigator Award  
45  
46 16 in Health Policy Research and by a career development award from the National  
47  
48 17 Institutes of Health (NHLBI K25 HL081275); no financial relationships with any  
49  
50 18 organisations that might have an interest in the submitted work in the previous 3 years;  
51  
52  
53  
54  
55  
56  
57  
58  
59  
60



1 no other relationships or activities that could appear to have influenced the submitted  
2 work.

3 **Ethical approval:** Ethical approval was not required.

4 **Data sharing:** No additional data available.

5 **Licence for publication statement:** The Corresponding Author has the right to grant  
6 on behalf of all authors and does grant on behalf of all authors, an exclusive licence (or  
7 non-exclusive for government employees) on a worldwide basis to the BMJ Group and  
8 co-owners or contracting owning societies (where published by the BMJ Group on  
9 their behalf), and its Licensees to permit this article (if accepted) to be published in  
10 BMJ Open and any other BMJ Group products and to exploit all subsidiary rights, as  
11 set out in our licence.

1  
2  
3  
4  
5 **1 Figure legends**  
6

7  
8 **2 Figure 1. Predicted mortality by occupations in men, Japan, 1970-2005.**  
9

10 We show mean predicted probabilities for all-cause premature mortality by nine  
11  
12 occupational groups among those aged 25 to 29 (referent category). We excluded  
13  
14 workers not classifiable by occupation and non-employed from the Figure.  
15  
16  
17  
18  
19  
20  
21

22 **7 Figure 2. Predicted mortality by occupations in women, Japan, 1970-2005.**  
23

24 We show mean predicted probabilities for all-cause premature mortality by nine  
25  
26 occupational groups among those aged 25 to 29 (referent category). We excluded  
27  
28 workers not classifiable by occupation and non-employed from the Figure.  
29  
30  
31  
32  
33  
34  
35  
36

37 **12 Figure 3. Geographic inequality of all-cause premature mortality, Japan,**  
38  
39 **13 1970-2005.**  
40

41 We show the overall geographic inequality of all-cause mortality across 47 prefectures,  
42  
43 conditional on individual age, occupation, and year. Prefecture-level residuals are  
44  
45 described in odds ratios with the reference being the grand mean of all the prefectures.  
46  
47  
48  
49 Prefectures with a lower and a higher estimate of odds for mortality are filled with blue  
50  
51  
52  
53  
54 and red, respectively. Regarding areas filled with gray, prefecture-level residuals were  
55  
56  
57  
58  
59  
60

1  
2  
3  
4  
5 1 not statistically significant.  
6  
7  
8  
9  
10  
11  
12  
13  
14  
15  
16  
17  
18  
19  
20  
21  
22  
23  
24  
25  
26  
27  
28  
29  
30  
31  
32  
33  
34  
35  
36  
37  
38  
39  
40  
41  
42  
43  
44  
45  
46  
47  
48  
49  
50  
51  
52  
53  
54  
55  
56  
57  
58  
59  
60

For peer review only

1 Table 1. Odds ratios for all-cause premature mortality in each occupation, Japan, 1970-2005<sup>a</sup>

|                                           | Overall |                  | 1970  |                  | 1975  |                  | 1980   |                    |
|-------------------------------------------|---------|------------------|-------|------------------|-------|------------------|--------|--------------------|
|                                           | OR      | (95% CI)         | OR    | (95% CI)         | OR    | (95% CI)         | OR     | (95% CI)           |
| <i>Men</i>                                |         |                  |       |                  |       |                  |        |                    |
| Specialist and technical workers          | 1.31    | (1.30 to 1.33)   | 0.74  | (0.72 to 0.77)   | 0.80  | (0.77 to 0.82)   | 1.18   | (1.14 to 1.21)     |
| Administrative and managerial workers     | 0.97    | (0.96 to 0.98)   | 0.54  | (0.53 to 0.56)   | 0.66  | (0.64 to 0.68)   | 0.76   | (0.74 to 0.78)     |
| Clerical workers                          | 1.20    | (1.19 to 1.21)   | 1.05  | (1.03 to 1.08)   | 1.09  | (1.06 to 1.12)   | 1.18   | (1.15 to 1.21)     |
| Sales workers                             | 1.26    | (1.25 to 1.27)   | 1.25  | (1.23 to 1.28)   | 1.26  | (1.24 to 1.29)   | 1.38   | (1.35 to 1.41)     |
| Service workers                           | 2.22    | (2.19 to 2.24)   | 1.22  | (1.18 to 1.27)   | 1.20  | (1.16 to 1.25)   | 1.93   | (1.86 to 1.99)     |
| Security workers                          | 1.05    | (1.03 to 1.08)   | 0.67  | (0.63 to 0.72)   | 0.76  | (0.72 to 0.81)   | 0.94   | (0.88 to 1.00)     |
| Agriculture, forestry and fishery workers | 1.89    | (1.87 to 1.91)   | 1.34  | (1.32 to 1.37)   | 1.48  | (1.45 to 1.51)   | 1.74   | (1.71 to 1.78)     |
| Transport and communication workers       | 1.29    | (1.28 to 1.31)   | 1.06  | (1.02 to 1.09)   | 0.98  | (0.95 to 1.02)   | 1.17   | (1.13 to 1.21)     |
| Production process and related workers    | 1.00    | Reference        | 1.00  | Reference        | 1.00  | Reference        | 1.00   | Reference          |
| Workers not classifiable by occupation    | 29.61   | (29.28 to 29.94) | 41.44 | (37.93 to 45.28) | 59.25 | (56.07 to 62.61) | 115.11 | (110.66 to 119.75) |
| Non-employed                              | 7.78    | (7.73 to 7.82)   | 5.83  | (5.73 to 5.93)   | 6.18  | (6.07 to 6.28)   | 6.68   | (6.56 to 6.80)     |
| <i>Women</i>                              |         |                  |       |                  |       |                  |        |                    |
| Specialist and technical workers          | 1.85    | (1.81 to 1.89)   | 1.64  | (1.54 to 1.74)   | 1.54  | (1.44 to 1.63)   | 1.88   | (1.77 to 2.00)     |
| Administrative and managerial workers     | 4.91    | (4.76 to 5.06)   | 3.57  | (3.26 to 3.91)   | 3.54  | (3.23 to 3.87)   | 3.17   | (2.88 to 3.50)     |
| Clerical workers                          | 1.23    | (1.20 to 1.25)   | 1.63  | (1.55 to 1.72)   | 1.35  | (1.28 to 1.42)   | 1.45   | (1.38 to 1.53)     |
| Sales workers                             | 1.80    | (1.77 to 1.83)   | 1.35  | (1.29 to 1.41)   | 1.45  | (1.38 to 1.52)   | 1.87   | (1.78 to 1.97)     |
| Service workers                           | 1.65    | (1.62 to 1.68)   | 1.11  | (1.06 to 1.17)   | 1.04  | (0.99 to 1.10)   | 1.77   | (1.68 to 1.86)     |
| Security workers                          | 12.22   | (11.40 to 13.10) | 11.43 | (9.14 to 14.29)  | 9.24  | (7.30 to 11.69)  | 11.57  | (9.07 to 14.76)    |
| Agriculture, forestry and fishery workers | 2.25    | (2.22 to 2.29)   | 1.65  | (1.60 to 1.71)   | 1.88  | (1.80 to 1.95)   | 2.18   | (2.09 to 2.28)     |
| Transport and communication workers       | 6.88    | (6.59 to 7.18)   | 4.01  | (3.53 to 4.55)   | 3.89  | (3.42 to 4.43)   | 7.07   | (6.31 to 7.91)     |
| Production process and related workers    | 1.00    | Reference        | 1.00  | Reference        | 1.00  | Reference        | 1.00   | Reference          |
| Workers not classifiable by occupation    | 42.07   | (41.22 to 42.93) | 41.07 | (35.48 to 47.54) | 14.58 | (13.19 to 16.12) | 110.06 | (103.28 to 117.29) |
| Non-employed                              | 4.81    | (4.75 to 4.88)   | 3.39  | (3.29 to 3.50)   | 3.45  | (3.34 to 3.56)   | 4.48   | (4.32 to 4.65)     |

2 CI; confidence interval, OR; odds ratio

3 <sup>a</sup> We adjusted for age (five year categories) and year in the overall model. We adjusted for only age (five year categories) in other models.

1 Table 1. Odds ratios for all-cause premature mortality in each occupation, Japan, 1970-2005 (cont.)

|  | 1985  |                  | 1990  |                  | 1995  |                  | 2000  |                  | 2005  |                  |
|--|-------|------------------|-------|------------------|-------|------------------|-------|------------------|-------|------------------|
|  | OR    | (95% CI)         |
|  | 1.14  | (1.10 to 1.17)   | 1.25  | (1.21 to 1.28)   | 1.35  | (1.32 to 1.39)   | 2.83  | (2.75 to 2.90)   | 2.50  | (2.43 to 2.57)   |
|  | 1.01  | (0.98 to 1.04)   | 1.04  | (1.01 to 1.07)   | 1.08  | (1.05 to 1.11)   | 2.26  | (2.19 to 2.34)   | 2.50  | (2.41 to 2.60)   |
|  | 1.25  | (1.22 to 1.28)   | 1.40  | (1.37 to 1.44)   | 1.34  | (1.31 to 1.38)   | 1.42  | (1.37 to 1.46)   | 1.07  | (1.03 to 1.11)   |
|  | 1.38  | (1.35 to 1.41)   | 1.26  | (1.23 to 1.29)   | 1.15  | (1.12 to 1.18)   | 1.37  | (1.33 to 1.41)   | 1.27  | (1.23 to 1.31)   |
|  | 1.97  | (1.91 to 2.04)   | 2.64  | (2.56 to 2.72)   | 2.90  | (2.81 to 2.99)   | 3.93  | (3.81 to 4.06)   | 3.97  | (3.84 to 4.11)   |
|  | 1.05  | (0.99 to 1.11)   | 1.28  | (1.21 to 1.36)   | 1.21  | (1.15 to 1.29)   | 1.53  | (1.45 to 1.62)   | 1.77  | (1.68 to 1.87)   |
|  | 1.97  | (1.92 to 2.01)   | 2.21  | (2.16 to 2.27)   | 2.37  | (2.30 to 2.44)   | 3.32  | (3.21 to 3.43)   | 3.12  | (3.00 to 3.24)   |
|  | 1.20  | (1.17 to 1.24)   | 1.33  | (1.29 to 1.37)   | 1.43  | (1.39 to 1.48)   | 1.88  | (1.82 to 1.94)   | 1.92  | (1.85 to 2.00)   |
|  | 1.00  | Reference        |
|  | 49.01 | (47.39 to 50.69) | 34.66 | (33.64 to 35.72) | 54.18 | (52.82 to 55.58) | 52.73 | (51.40 to 54.08) | 9.13  | (8.80 to 9.48)   |
|  | 6.94  | (6.82 to 7.06)   | 8.15  | (8.01 to 8.30)   | 8.59  | (8.44 to 8.74)   | 11.16 | (10.93 to 11.39) | 14.21 | (13.90 to 14.52) |
|  | 1.82  | (1.71 to 1.93)   | 1.85  | (1.74 to 1.96)   | 2.02  | (1.89 to 2.15)   | 2.83  | (2.65 to 3.01)   | 2.63  | (2.45 to 2.82)   |
|  | 3.68  | (3.37 to 4.02)   | 5.16  | (4.77 to 5.58)   | 6.08  | (5.60 to 6.61)   | 10.16 | (9.31 to 11.09)  | 12.21 | (11.07 to 13.47) |
|  | 1.26  | (1.20 to 1.33)   | 1.17  | (1.11 to 1.23)   | 1.32  | (1.25 to 1.40)   | 1.31  | (1.23 to 1.39)   | 1.26  | (1.17 to 1.35)   |
|  | 2.03  | (1.93 to 2.13)   | 1.89  | (1.80 to 1.98)   | 1.94  | (1.83 to 2.05)   | 2.20  | (2.06 to 2.34)   | 2.32  | (2.16 to 2.50)   |
|  | 1.67  | (1.58 to 1.76)   | 1.86  | (1.77 to 1.95)   | 2.21  | (2.09 to 2.33)   | 2.42  | (2.28 to 2.57)   | 2.49  | (2.33 to 2.67)   |
|  | 19.51 | (16.24 to 23.43) | 17.07 | (14.34 to 20.33) | 13.22 | (10.88 to 16.05) | 12.49 | (10.34 to 15.09) | 16.25 | (13.65 to 19.34) |
|  | 2.08  | (1.98 to 2.18)   | 2.10  | (2.00 to 2.20)   | 2.63  | (2.47 to 2.79)   | 3.15  | (2.93 to 3.39)   | 3.42  | (3.14 to 3.73)   |
|  | 7.52  | (6.73 to 8.40)   | 9.54  | (8.59 to 10.61)  | 8.17  | (7.20 to 9.28)   | 9.65  | (8.45 to 11.01)  | 11.54 | (10.06 to 13.24) |
|  | 1.00  | Reference        |
|  | 48.48 | (45.76 to 51.37) | 51.39 | (48.69 to 54.24) | 90.68 | (86.15 to 95.46) | 80.79 | (76.53 to 85.29) | 14.45 | (13.33 to 15.67) |
|  | 4.38  | (4.23 to 4.54)   | 4.46  | (4.30 to 4.62)   | 6.29  | (6.04 to 6.55)   | 7.91  | (7.55 to 8.29)   | 9.62  | (9.10 to 10.16)  |

2

1 Table 2. Adjusted prefecture-level variance for all-cause premature mortality, Japan, 1970-2005 <sup>a</sup>

|                   | Men                       |                  |                          | Women                     |                  |                          |
|-------------------|---------------------------|------------------|--------------------------|---------------------------|------------------|--------------------------|
|                   | Variance (on logit scale) |                  |                          | Variance (on logit scale) |                  |                          |
|                   | Estimate                  | (95% CI)         | Range of OR <sup>b</sup> | Estimate                  | (95% CI)         | Range of OR <sup>b</sup> |
| Overall           | 0.003                     | (0.001 to 0.004) | 0.87 to 1.13             | 0.005                     | (0.003 to 0.007) | 0.84 to 1.11             |
| 1970 <sup>c</sup> | 0.003                     | (0.002 to 0.005) | 0.89 to 1.12             | 0.007                     | (0.004 to 0.010) | 0.79 to 1.14             |
| 1975              | 0.003                     | (0.001 to 0.004) | 0.88 to 1.09             | 0.007                     | (0.004 to 0.010) | 0.82 to 1.19             |
| 1980              | 0.004                     | (0.002 to 0.005) | 0.82 to 1.11             | 0.005                     | (0.003 to 0.008) | 0.85 to 1.15             |
| 1985              | 0.003                     | (0.001 to 0.004) | 0.85 to 1.09             | 0.005                     | (0.002 to 0.007) | 0.86 to 1.13             |
| 1990              | 0.003                     | (0.002 to 0.004) | 0.89 to 1.11             | 0.004                     | (0.002 to 0.006) | 0.88 to 1.10             |
| 1995              | 0.006                     | (0.003 to 0.009) | 0.85 to 1.22             | 0.008                     | (0.004 to 0.012) | 0.80 to 1.15             |
| 2000              | 0.007                     | (0.004 to 0.010) | 0.84 to 1.25             | 0.010                     | (0.005 to 0.015) | 0.76 to 1.15             |
| 2005              | 0.011                     | (0.007 to 0.016) | 0.81 to 1.27             | 0.012                     | (0.007 to 0.017) | 0.75 to 1.18             |

2 CI; confidence interval, OR; odds ratio

3 <sup>a</sup> We adjusted for age (five year categories) and occupations. We further adjusted for year in the overall model.

4 <sup>b</sup> The range of adjusted odds ratios for mortality in each prefecture is shown. The reference is the grand mean of all the prefectures.

5 <sup>c</sup> The variance between 46 prefectures is shown because the data for Okinawa prefecture were not available in 1970.

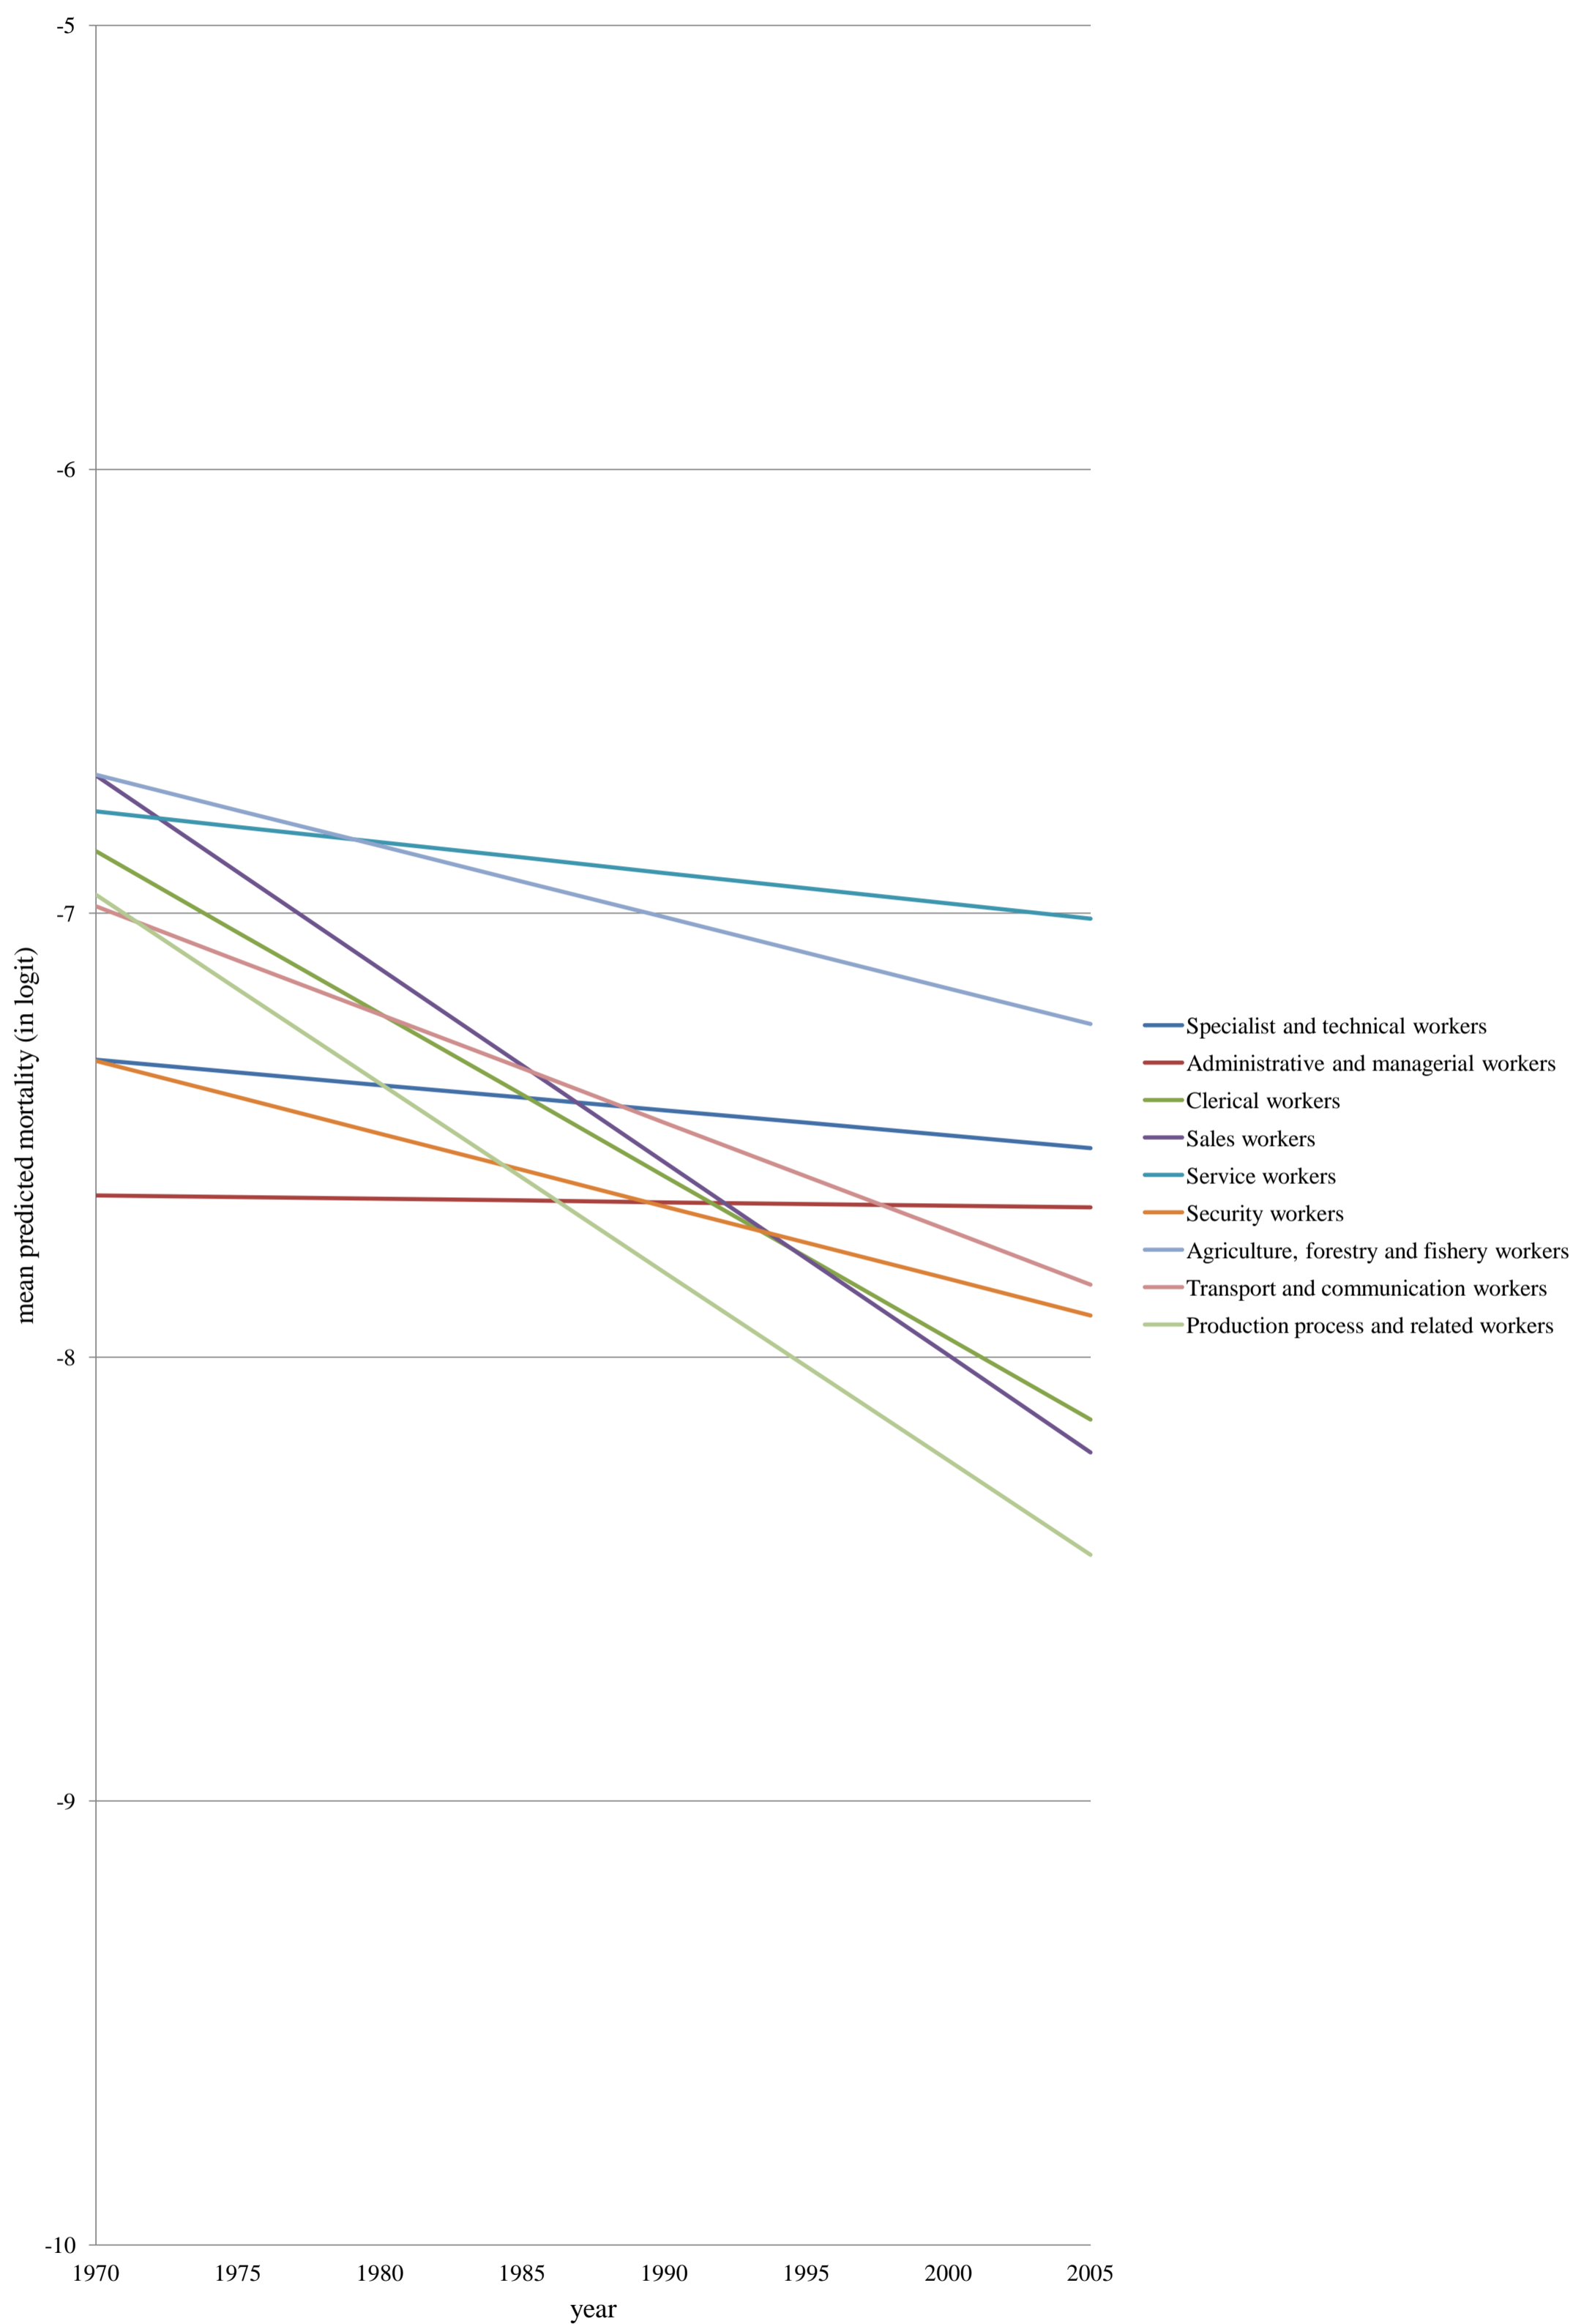







1  
2  
3  
4  
5  
6  
7  
8  
9  
10  
11  
12  
13  
14  
15  
16  
17  
18  
19  
20  
21  
22  
23  
24  
25  
26  
27  
28  
29  
30  
31  
32  
33  
34  
35  
36  
37  
38  
39  
40  
41  
42  
43



## Supplementary Text

### Overview of supplementary analyses

As supplementary analyses, we examined two additional issues to further explore the social and geographic inequalities in premature mortality; (i) the patterns of geographic inequalities in mortality by occupations, and (ii) the presence of contextual effects of prefecture-level socioeconomic status on mortality risk.

### Geographic inequalities in all-cause premature mortality by occupations

#### *Background and aims*

Although we examined the patterns of geographic inequalities in premature mortality for all occupations in the main analysis, the patterns may vary (substantially) according to occupations. Therefore, we examined the occupation-specific geographic inequality in premature mortality for the overall study period. This analysis may further facilitate understanding of the possible pathways of emerging geographic inequalities in Japan.

#### *Methods*

Following the previous report of the Population Census,<sup>1</sup> we summarized the 11 occupations into six groups to increase the statistical power as follows: I. clerical, technical and managerial occupations (i.e., (1) specialist and technical workers, (2) administrative and managerial workers, and (3) clerical workers), II. sales and service occupations (i.e., (4) sales workers, (5) service workers, and (6) security workers), III. agriculture, forestry and fishery occupations (i.e., (7) agriculture, forestry and fishery workers), IV. production and transport occupations (i.e., (8) transport and communication workers and (9) production process and related workers), V. unclassifiable occupations (i.e., (10) workers not classifiable by occupation), and VI. non-employed (i.e., (11) non-employed) (Supplementary Table 1).

In this supplementary analysis, we specified six prefecture-level error terms (at level 3) corresponding to the six occupational groups, conditional on individual age, 11 occupations, and years as fixed terms. We calculated the variance and covariance of these error terms, and we also derived their correlation coefficients to explore the possible differential geographic patterns of mortality by the six occupational groups. Finally, we created maps showing prefecture-level residuals in the same methods as the main analysis.

#### *Results*

We show the results of variance and covariance of prefecture-level residuals among the six occupational groups (Supplementary Table 8). Men and women revealed a similar pattern except for the covariance between sales and service occupations and non-employed (-0.003 and 0.005 in men and women, respectively) and the covariance between agriculture, forestry and fishery occupations

1  
2  
3  
4 and unclassifiable occupations (0.006 and -0.019 in men and women, respectively). In both sexes, the  
5 variances among unclassifiable occupations were much higher than those of other occupational groups  
6 (0.317 and 0.331 in men and women, respectively). Further, excluding unclassifiable occupations and  
7 non-employed, the signs of correlation coefficients were all positive, indicating that the patterns of  
8 geographic inequalities were similar across the remaining four occupational groups. We show these  
9 geographic patterns in both sexes (Supplementary Figures 4 and 5).  
10  
11  
12

## 13 **Contextual effect of prefecture-level socioeconomic status**

### 14 ***Background and aims***

15  
16  
17 Previous studies in Japan have examined possible contextual effects of area-level socioeconomic  
18 status (e.g., income inequality, per-capita income) on self-rated health and health-related behaviors by  
19 using multilevel analysis.<sup>2-4</sup> The relationship between area-level socioeconomic status and mortality  
20 has been also investigated in ecological studies,<sup>5-12</sup> most of which indicated higher mortality in areas  
21 of lower socioeconomic position. Indeed, recent international comparative studies have confirmed an  
22 association between income inequality and health, which included Japan.<sup>13-15</sup> However, no studies  
23 have examined the association between area-level socioeconomic status and premature adult mortality  
24 in Japan, by considering both individual- and area-level socioeconomic indicators. Further, we note  
25 the possibility that contextual effects by area-level disadvantage may have changed after the collapse  
26 of asset bubble in the early 1990s. Therefore, we examined the trends of contextual effects of  
27 prefecture-level socioeconomic status on premature adult mortality.  
28  
29  
30  
31  
32  
33  
34  
35

### 36 ***Methods***

37 We derived prefecture-level socioeconomic status variables from the *National Survey of Family*  
38 *Income and Expenditure*,<sup>16</sup> which has been implemented every five years since the first survey in 1959.  
39 We derived the following three variables for each prefecture and divided them into tertiles; Gini's  
40 coefficient of yearly income, average yearly income, and average savings (Supplementary Table 9).  
41 These variables were calculated among two-or-more-person households. Gini's coefficient of yearly  
42 income was available since 1979, and we imputed the values of 1979 forwardly to 1969 and 1974.  
43 Although household income and savings may follow the skewed distributions, median income or  
44 savings were not available throughout the study period. Note that a previous review article suggested  
45 that the studies in income inequality are more supportive in large areas, e.g., states, regions, and  
46 metropolitan areas, because in that context income inequality serves as a measure of the scale of  
47 social stratification.<sup>17</sup> As Shibuya et al.<sup>2</sup> noted, a prefecture is similar to a state in the United States in  
48 terms of its population size and variations in income inequality.  
49  
50  
51  
52  
53  
54  
55

56 We linked the data set of prefecture-level variables to the data set of the Population Census and the  
57 Vital Statistics one year out, e.g., National Survey of Family Income and Expenditure in 2004 was  
58 linked with the Population Census in 2005 and the Vital Statistics in 2005 fiscal year.  
59  
60

In the analysis, we conducted three-level analyses as an overall model, with cells at level 1, years

1  
2  
3  
4 at level 2, and prefectures at level 3. The prefecture-level socioeconomic status variable was entered  
5 into the model as a level-2 variable separately. Furthermore, to examine the joint effects of income  
6 inequality and average income/savings, we also entered Gini's coefficient and average yearly  
7 income/savings into the model simultaneously. In like manner, to examine the temporal patterns of  
8 contextual effects, we also conducted two-level analysis, with cells at level 1 and prefectures at level 2  
9 separately for each year.  
10  
11  
12

### 13 14 **Results**

15 Overall, we found little evidence of the association between prefecture-level socioeconomic status and  
16 the risk of mortality in both sexes, conditional on individual age and occupation (Supplementary Table  
17 10). Likewise, in year-specific analyses, no clear associations were found although lower average  
18 savings were associated with higher risk of mortality in some years. When we examined the joint  
19 effects of income inequality and average income/savings, no substantial differences were observed  
20 (data not shown).  
21  
22  
23  
24  
25

### 26 27 **Conclusions of supplementary analyses**

28 Excluding unclassifiable occupations and non-employed, the patterns of geographic inequalities were  
29 similar across occupational groups. We found no clear associations between prefecture-level  
30 socioeconomic status and premature mortality risk throughout the period although there is suggestion  
31 of inverse association between average savings and mortality in some years.  
32  
33  
34  
35

### 36 37 **References**

- 38 1. Ministry of Internal Affairs and Communications. Population Census: Explanation of Terms.  
39 <http://www.stat.go.jp/english/data/kokusei/2000/terms.htm#Occupation>.
- 40 2. Shibuya K, Hashimoto H, Yano E. Individual income, income distribution, and self rated health in  
41 Japan: cross sectional analysis of nationally representative sample. *BMJ* 2002;324:16-9.
- 42 3. Fukuda Y, Nakamura K, Takano T. Accumulation of health risk behaviours is associated with lower  
43 socioeconomic status and women's urban residence: a multilevel analysis in Japan. *BMC Public*  
44 *Health* 2005;5:53. doi:10.1186/1471-2458-5-53.
- 45 4. Ichida Y, Kondo K, Hirai H, Hanibuchi T, Yoshikawa G, Murata C. Social capital, income  
46 inequality and self-rated health in Chita peninsula, Japan: a multilevel analysis of older people in  
47 25 communities. *Soc Sci Med* 2009;69:489-99.
- 48 5. Fukuda Y, Nakao H, Yahata Y, Imai H. Are health inequalities increasing in Japan? The trends of  
49 1955 to 2000. *Biosci Trends* 2007;1:38-42.
- 50 6. Fukuda Y, Nakamura K, Takano T. Higher mortality in areas of lower socioeconomic position  
51 measured by a single index of deprivation in Japan. *Public Health* 2007;121:163-73.
- 52 7. Nakaya T, Dorling D. Geographical inequalities of mortality by income in two developed island  
53 countries: a cross-national comparison of Britain and Japan. *Soc Sci Med* 2005;60:2865-75.  
54  
55  
56  
57  
58  
59  
60

- 1  
2  
3  
4  
5  
6  
7  
8  
9  
10  
11  
12  
13  
14  
15  
16  
17  
18  
19  
20  
21  
22  
23  
24  
25  
26  
27  
28  
29  
30  
31  
32  
33  
34  
35  
36  
37  
38  
39  
40  
41  
42  
43  
44  
45  
46  
47  
48  
49  
50  
51  
52  
53  
54  
55  
56  
57  
58  
59  
60
8. Fukuda Y, Nakamura K, Takano T. Cause-specific mortality differences across socioeconomic position of municipalities in Japan, 1973-1977 and 1993-1998: Increased importance of injury and suicide in inequality for ages under 75. *Int J Epidemiol* 2005;34:100-9.
9. Fukuda Y, Umezaki M, Nakamura K, Takano T. Variations in societal characteristics of spatial disease clusters: examples of colon, lung and breast cancer in Japan. *Int J Health Geogr* 2005;4:16. doi:10.1186/1476-072X-4-16.
10. Fukuda Y, Nakamura K, Takano T. Municipal health expectancy in Japan: decreased healthy longevity of older people in socioeconomically disadvantaged areas. *BMC Public Health* 2005;5:65. doi:10.1186/1471-2458-5-65.
11. Fukuda Y, Nakamura K, Takano T. Municipal socioeconomic status and mortality in Japan: sex and age differences, and trends in 1973-1998. *Soc Sci Med* 2004;59:2435-45.
12. Fukuda Y, Nakamura K, Takano T. Wide range of socioeconomic factors associated with mortality among cities in Japan. *Health Promot Int* 2004;19:177-87.
13. Kim D, Kawachi I, Hoorn SV, Ezzati M. Is inequality at the heart of it? Cross-country associations of income inequality with cardiovascular diseases and risk factors. *Soc Sci Med* 2008;66:1719-32.
14. Elgar FJ. Income inequality, trust, and population health in 33 countries. *Am J Public Health* 2010;100:2311-5.
15. Karlsson M, Nilsson T, Lyttkens CH, Leeson G. Income inequality and health: importance of a cross-country perspective. *Soc Sci Med* 2010;70:875-85.
16. Ministry of Internal Affairs and Communications. National Survey of Family Income and Expenditure. <http://www.stat.go.jp/english/data/zensho/index.htm>.
17. Wilkinson RG, Pickett KE. Income inequality and population health: A review and explanation of the evidence. *Soc Sci Med* 2006;62:1768-84.

Supplementary Table 1. The history of the Japan Standard Occupational Classification <sup>a</sup>

| 1st revision, 1970 |                                                     | 2nd revision, 1979 |                                                     | 3rd revision, 1986 |                                                                             | 4th revision, 1997 |                                           |
|--------------------|-----------------------------------------------------|--------------------|-----------------------------------------------------|--------------------|-----------------------------------------------------------------------------|--------------------|-------------------------------------------|
| No.                | Occupation (major group)                            | No.                | Occupation (major group)                            | No.                | Occupation (major group)                                                    | No.                | Occupation (major group) <sup>b</sup>     |
| (1) [1]            | Professional and technical workers                  | (1) [1]            | Professional and technical workers                  | (1) [1]            | Professional and technical workers                                          | (1) [1]            | Specialist and technical workers          |
| (2) [2]            | Managers and officials                              | (2) [2]            | Managers and officials                              | (2) [2]            | Managers and officials                                                      | (2) [2]            | Administrative and managerial workers     |
| (3) [3]            | Clerical and related workers                        | (3) [3]            | Clerical and related workers                        | (3) [3]            | Clerical and related workers                                                | (3) [3]            | Clerical workers                          |
| (4) [4]            | Sales workers                                       | (4) [4]            | Sales workers                                       | (4) [4]            | Sales workers                                                               | (4) [4]            | Sales workers                             |
| (5) [7]            | Farmers, Lumbermen and fishermen                    | (5) [7]            | Agricultural, forestry and fisheries workers        | (5) [5]            | Service workers                                                             | (5) [5]            | Service workers                           |
| (6) [9]            | Workers in mining and quarrying occupations         | (6) [9]            | Mining workers                                      | (6) [6]            | Protective service workers                                                  | (6) [6]            | Security workers                          |
| (7) [8]            | Workers in transport and communications occupations | (7) [8]            | Workers in transport and communications occupations | (7) [7]            | Agricultural, forestry and fisheries workers                                | (7) [7]            | Agriculture, forestry and fishery workers |
| (8) [9]            | Craftsmen, production process workers and labourers | (8) [9]            | Craftsmen, production process workers and labours   | (8) [8]            | Workers in transport and communications occupations                         | (8) [8]            | Transport and communication workers       |
| (9) [6]            | Protective service workers                          | (9) [6]            | Protective service workers                          | (9) [9]            | Craftsmen, mining, production process and construction workers and laborers | (9) [9]            | Production process and related workers    |
| (10) [5]           | Service workers                                     | (10) [5]           | Service workers                                     | (10) [10]          | Workers not classifiable by occupation                                      | (10) [10]          | Workers not classifiable by occupation    |
| (11) [10]          | Unclassifiable                                      | (11) [10]          | Workers not classifiable by occupation              | (11) [11]          | Non-employed <sup>c</sup>                                                   | (11) [11]          | Non-employed <sup>c</sup>                 |
| (12) [11]          | Non-employed <sup>c</sup>                           | (11) [11]          | Non-employed <sup>c</sup>                           |                    |                                                                             |                    |                                           |

<sup>a</sup> We consistently used occupation (major group) of the 4th revision. The number in square brackets is the classification used in this present study.

<sup>b</sup> When showing geographic inequality by occupation, we summarized these 11 occupation into six groups as follows:

- I. Clerical, technical and managerial occupations: (1) specialist and technical workers, (2) administrative and managerial workers, and (3) clerical workers
- II. Sales and service occupations: (4) sales workers, (5) service workers, and (6) security workers
- III. Agriculture, forestry and fishery occupations: (7) agriculture, forestry and fishery workers
- IV. Production and transport occupations: (8) transport and communication workers and (9) production process and related workers
- V. Unclassifiable occupations: (10) workers not classifiable by occupation
- VI. Non-employed: (11) non-employed

<sup>c</sup> Non-employed refers to the sum of unemployed and non-labor force in line with the *Report of Vital Statistics: Occupational and Industrial Aspects*.

**Supplementary Table 2.** Description of data in 47 prefectures, Japan, 1970-2005

|                         | Men           |                  |                                         |         | Women         |                  |                                         |         |
|-------------------------|---------------|------------------|-----------------------------------------|---------|---------------|------------------|-----------------------------------------|---------|
|                         | No. of deaths | Total population | Mortality rate per 100,000 <sup>a</sup> |         | No. of deaths | Total population | Mortality rate per 100,000 <sup>a</sup> |         |
|                         |               |                  |                                         | (SD)    |               |                  |                                         | (SD)    |
| Overall                 | 984,022       | 251,576,351      | 1,569                                   | (6,718) | 532,223       | 259,688,353      | 758                                     | (3,914) |
| Prefectures             |               |                  |                                         |         |               |                  |                                         |         |
| 1 Hokkaido              | 49,247        | 11,489,095       | 1,870                                   | (7,692) | 26,436        | 12,394,724       | 886                                     | (4,366) |
| 2 Aomori                | 15,202        | 2,959,355        | 1,531                                   | (6,760) | 7,282         | 3,248,812        | 471                                     | (2,143) |
| 3 Iwate                 | 13,258        | 2,856,175        | 2,187                                   | (9,429) | 6,959         | 3,067,651        | 864                                     | (4,827) |
| 4 Miyagi                | 17,042        | 4,448,360        | 1,412                                   | (5,469) | 9,137         | 4,625,004        | 728                                     | (3,064) |
| 5 Akita                 | 12,371        | 2,512,525        | 1,410                                   | (5,569) | 6,168         | 2,740,415        | 561                                     | (3,178) |
| 6 Yamagata              | 10,748        | 2,553,156        | 1,863                                   | (8,426) | 5,824         | 2,679,130        | 978                                     | (4,649) |
| 7 Fukushima             | 18,520        | 4,200,931        | 1,368                                   | (4,958) | 9,601         | 4,341,831        | 454                                     | (1,655) |
| 8 Ibaraki               | 23,125        | 5,779,563        | 1,101                                   | (3,644) | 12,135        | 5,665,132        | 511                                     | (2,853) |
| 9 Tochigi               | 16,375        | 3,976,411        | 1,643                                   | (6,942) | 8,590         | 3,941,144        | 876                                     | (3,381) |
| 10 Gunma                | 15,506        | 4,036,944        | 1,704                                   | (6,946) | 8,651         | 4,069,213        | 532                                     | (2,058) |
| 11 Saitama              | 43,148        | 13,129,693       | 1,436                                   | (5,956) | 23,114        | 12,774,631       | 519                                     | (1,419) |
| 12 Chiba                | 39,273        | 11,279,717       | 1,247                                   | (4,401) | 19,925        | 11,073,425       | 652                                     | (3,696) |
| 13 Tokyo                | 91,194        | 25,686,395       | 1,374                                   | (5,119) | 49,601        | 25,677,746       | 598                                     | (1,754) |
| 14 Kanagawa             | 54,947        | 16,940,375       | 1,330                                   | (5,569) | 28,202        | 16,194,532       | 1,053                                   | (5,584) |
| 15 Niigata              | 21,083        | 5,083,511        | 1,945                                   | (7,533) | 10,861        | 5,245,859        | 714                                     | (3,398) |
| 16 Toyama               | 9,238         | 2,300,243        | 1,606                                   | (7,190) | 5,250         | 2,429,822        | 980                                     | (5,406) |
| 17 Ishikawa             | 8,670         | 2,301,490        | 1,655                                   | (7,956) | 5,013         | 2,447,439        | 953                                     | (6,194) |
| 18 Fukui                | 5,611         | 1,643,881        | 1,677                                   | (7,209) | 3,556         | 1,721,279        | 1,391                                   | (7,473) |
| 19 Yamanashi            | 7,183         | 1,720,587        | 1,436                                   | (5,625) | 3,727         | 1,754,097        | 719                                     | (3,804) |
| 20 Nagano               | 15,876        | 4,393,794        | 2,175                                   | (8,828) | 9,505         | 4,551,945        | 853                                     | (4,017) |
| 21 Gifu                 | 14,957        | 4,139,225        | 1,515                                   | (6,609) | 9,222         | 4,333,798        | 913                                     | (4,421) |
| 22 Shizuoka             | 28,057        | 7,639,953        | 1,962                                   | (8,756) | 14,720        | 7,674,935        | 565                                     | (1,736) |
| 23 Aichi                | 46,925        | 14,066,571       | 1,626                                   | (7,368) | 26,699        | 13,817,272       | 764                                     | (2,784) |
| 24 Mie                  | 14,118        | 3,624,980        | 1,408                                   | (5,186) | 7,828         | 3,794,338        | 583                                     | (2,379) |
| 25 Shiga                | 8,125         | 2,428,751        | 1,453                                   | (5,976) | 4,883         | 2,465,170        | 782                                     | (3,805) |
| 26 Kyoto                | 18,723        | 5,109,042        | 1,166                                   | (3,889) | 11,146        | 5,465,224        | 464                                     | (2,094) |
| 27 Osaka                | 73,055        | 18,232,091       | 1,964                                   | (7,462) | 38,671        | 18,808,092       | 1,109                                   | (4,676) |
| 28 Hyogo                | 44,110        | 10,970,009       | 1,940                                   | (7,967) | 23,963        | 11,550,437       | 798                                     | (3,145) |
| 29 Nara                 | 9,755         | 2,621,500        | 1,730                                   | (7,403) | 5,598         | 2,813,039        | 971                                     | (4,423) |
| 30 Wakayama             | 10,006        | 2,169,994        | 1,276                                   | (6,597) | 5,596         | 2,358,333        | 573                                     | (2,872) |
| 31 Tottori              | 5,687         | 1,212,157        | 2,055                                   | (8,746) | 2,862         | 1,295,687        | 695                                     | (3,717) |
| 32 Shimane              | 7,103         | 1,546,077        | 2,051                                   | (8,981) | 3,829         | 1,651,580        | 891                                     | (4,704) |
| 33 Okayama              | 15,296        | 3,828,579        | 1,991                                   | (8,329) | 8,127         | 4,043,112        | 720                                     | (3,298) |
| 34 Hiroshima            | 23,074        | 5,750,006        | 1,708                                   | (6,593) | 12,338        | 6,008,967        | 852                                     | (3,726) |
| 35 Yamaguchi            | 14,671        | 3,127,157        | 2,051                                   | (8,498) | 7,883         | 3,435,624        | 582                                     | (2,276) |
| 36 Tokushima            | 7,871         | 1,661,674        | 711                                     | (1,797) | 4,406         | 1,786,025        | 454                                     | (1,935) |
| 37 Kagawa               | 8,494         | 2,052,654        | 999                                     | (3,529) | 4,743         | 2,182,213        | 551                                     | (3,159) |
| 38 Ehime                | 13,813        | 2,961,350        | 2,209                                   | (8,794) | 7,631         | 3,279,967        | 781                                     | (3,189) |
| 39 Kochi                | 8,686         | 1,627,246        | 1,004                                   | (3,355) | 4,403         | 1,792,884        | 353                                     | (1,777) |
| 40 Fukuoka              | 41,386        | 9,316,985        | 1,349                                   | (5,374) | 22,159        | 10,313,913       | 790                                     | (3,359) |
| 41 Saga                 | 7,618         | 1,664,620        | 1,458                                   | (7,446) | 4,307         | 1,844,827        | 1,057                                   | (6,718) |
| 42 Nagasaki             | 14,563        | 2,995,173        | 1,398                                   | (5,680) | 8,010         | 3,346,375        | 813                                     | (4,295) |
| 43 Kumamoto             | 15,029        | 3,485,422        | 780                                     | (2,080) | 8,554         | 3,916,400        | 623                                     | (2,600) |
| 44 Oita                 | 10,691        | 2,389,418        | 1,658                                   | (6,904) | 6,345         | 2,691,272        | 834                                     | (3,893) |
| 45 Miyazaki             | 10,422        | 2,240,503        | 1,866                                   | (8,416) | 5,606         | 2,496,028        | 1,239                                   | (7,251) |
| 46 Kagoshima            | 16,626        | 3,369,654        | 1,329                                   | (5,321) | 9,565         | 3,795,497        | 859                                     | (3,649) |
| 47 Okinawa <sup>b</sup> | 7,544         | 2,053,359        | 1,046                                   | (5,404) | 3,592         | 2,083,513        | 722                                     | (4,594) |

SD; standard deviation

<sup>a</sup> Mortality rate was calculated on the basis of the means of the proportion of deaths for each prefecture across all cell types.<sup>b</sup> The data for Okinawa prefecture were not available in 1970.

**Supplementary Table 3.** The number (percentage) of total population in each occupation, Japan, 1970-2005

|                                           | 1970       |          | 1975       |          | 1980       |          | 1985       |          | 1990       |          | 1995       |          | 2000       |          | 2005       |          |
|-------------------------------------------|------------|----------|------------|----------|------------|----------|------------|----------|------------|----------|------------|----------|------------|----------|------------|----------|
| <i>Men</i>                                |            |          |            |          |            |          |            |          |            |          |            |          |            |          |            |          |
| Specialist and technical workers          | 1,835,895  | (7.32)   | 2,080,025  | (7.25)   | 2,306,830  | (7.51)   | 3,143,412  | (9.76)   | 3,637,515  | (10.95)  | 3,991,077  | (11.72)  | 4,221,683  | (12.27)  | 3,950,815  | (11.90)  |
| Administrative and managerial workers     | 1,797,390  | (7.17)   | 1,972,340  | (6.88)   | 2,210,783  | (7.19)   | 1,868,101  | (5.80)   | 1,998,511  | (6.01)   | 2,066,172  | (6.07)   | 1,305,093  | (3.79)   | 1,031,316  | (3.11)   |
| Clerical workers                          | 2,914,350  | (11.62)  | 3,674,725  | (12.81)  | 3,637,048  | (11.83)  | 3,857,022  | (11.98)  | 3,895,784  | (11.72)  | 3,906,006  | (11.47)  | 4,077,310  | (11.85)  | 4,093,124  | (12.33)  |
| Sales workers                             | 2,681,490  | (10.69)  | 3,508,340  | (12.23)  | 4,132,015  | (13.44)  | 4,509,884  | (14.00)  | 4,794,455  | (14.43)  | 5,044,836  | (14.82)  | 5,159,661  | (15.00)  | 4,716,064  | (14.21)  |
| Service workers                           | 738,725    | (2.95)   | 984,940    | (3.43)   | 1,027,910  | (3.34)   | 1,123,385  | (3.49)   | 1,202,319  | (3.62)   | 1,270,668  | (3.73)   | 1,381,504  | (4.02)   | 1,441,522  | (4.34)   |
| Security workers                          | 438,955    | (1.75)   | 520,720    | (1.82)   | 567,438    | (1.85)   | 615,053    | (1.91)   | 660,161    | (1.99)   | 706,462    | (2.08)   | 787,325    | (2.29)   | 832,148    | (2.51)   |
| Agriculture, forestry and fishery workers | 3,531,500  | (14.08)  | 2,849,180  | (9.94)   | 2,379,666  | (7.74)   | 2,112,513  | (6.56)   | 1,615,756  | (4.86)   | 1,199,620  | (3.52)   | 899,881    | (2.62)   | 823,066    | (2.48)   |
| Transport and communication workers       | 1,682,400  | (6.71)   | 1,972,390  | (6.88)   | 2,072,133  | (6.74)   | 1,997,137  | (6.2)    | 1,984,890  | (5.97)   | 2,020,393  | (5.93)   | 1,957,847  | (5.69)   | 1,794,551  | (5.41)   |
| Production process and related workers    | 8,428,675  | (33.61)  | 9,645,620  | (33.63)  | 10,682,007 | (34.76)  | 10,644,436 | (33.05)  | 10,985,461 | (33.06)  | 10,945,330 | (32.15)  | 10,762,241 | (31.28)  | 10,451,026 | (31.48)  |
| Workers not classifiable by occupation    | 6,725      | (0.03)   | 13,870     | (0.05)   | 22,474     | (0.07)   | 50,391     | (0.16)   | 115,015    | (0.35)   | 151,362    | (0.44)   | 294,663    | (0.86)   | 502,667    | (1.51)   |
| Non-employed <sup>a</sup>                 | 1,024,357  | (4.08)   | 1,456,032  | (5.08)   | 1,696,114  | (5.52)   | 2,283,403  | (7.09)   | 2,339,703  | (7.04)   | 2,744,327  | (8.06)   | 3,559,611  | (10.35)  | 3,559,611  | (10.72)  |
| Total                                     | 25,080,462 | (100.00) | 28,678,182 | (100.00) | 30,734,418 | (100.00) | 32,204,737 | (100.00) | 33,229,570 | (100.00) | 34,046,253 | (100.00) | 34,406,819 | (100.00) | 33,195,910 | (100.00) |
| <i>Women</i>                              |            |          |            |          |            |          |            |          |            |          |            |          |            |          |            |          |
| Specialist and technical workers          | 800,245    | (3.00)   | 1,121,045  | (3.73)   | 1,507,610  | (4.72)   | 1,891,400  | (5.73)   | 2,250,231  | (6.69)   | 2,684,971  | (7.83)   | 3,094,599  | (8.87)   | 3,459,894  | (9.83)   |
| Administrative and managerial workers     | 86,615     | (0.32)   | 105,985    | (0.35)   | 155,251    | (0.49)   | 171,782    | (0.52)   | 184,219    | (0.55)   | 199,894    | (0.58)   | 142,983    | (0.41)   | 123,283    | (0.35)   |
| Clerical workers                          | 1,694,870  | (6.36)   | 2,753,760  | (9.16)   | 3,369,822  | (10.56)  | 4,248,922  | (12.86)  | 5,155,485  | (15.32)  | 5,748,954  | (16.76)  | 6,289,031  | (18.03)  | 6,422,961  | (18.25)  |
| Sales workers                             | 1,885,440  | (7.07)   | 2,152,320  | (7.16)   | 2,586,857  | (8.11)   | 2,447,212  | (7.41)   | 2,534,197  | (7.53)   | 2,702,863  | (7.88)   | 2,618,387  | (7.51)   | 2,561,132  | (7.28)   |
| Service workers                           | 1,634,865  | (6.13)   | 1,974,925  | (6.57)   | 2,106,305  | (6.60)   | 2,173,931  | (6.58)   | 2,263,285  | (6.73)   | 2,516,848  | (7.34)   | 2,825,178  | (8.10)   | 3,207,147  | (9.11)   |
| Security workers                          | 5,830      | (0.02)   | 8,010      | (0.03)   | 9,876      | (0.03)   | 12,390     | (0.04)   | 16,562     | (0.05)   | 24,289     | (0.07)   | 37,414     | (0.11)   | 43,158     | (0.12)   |
| Agriculture, forestry and fishery workers | 4,558,975  | (17.10)  | 3,154,040  | (10.49)  | 2,471,427  | (7.75)   | 2,029,368  | (6.14)   | 1,478,304  | (4.39)   | 1,055,672  | (3.08)   | 755,524    | (2.17)   | 600,419    | (1.71)   |
| Transport and communication workers       | 99,570     | (0.37)   | 108,500    | (0.36)   | 108,205    | (0.34)   | 96,205     | (0.29)   | 84,717     | (0.25)   | 93,936     | (0.27)   | 92,226     | (0.26)   | 85,394     | (0.24)   |
| Production process and related workers    | 3,546,495  | (13.30)  | 3,691,205  | (12.28)  | 4,456,927  | (13.97)  | 4,911,261  | (14.87)  | 5,158,278  | (15.33)  | 4,862,147  | (14.17)  | 4,664,292  | (13.37)  | 4,228,532  | (12.01)  |
| Workers not classifiable by occupation    | 5,285      | (0.02)   | 34,995     | (0.12)   | 24,186     | (0.08)   | 66,917     | (0.20)   | 89,544     | (0.27)   | 121,135    | (0.35)   | 223,913    | (0.64)   | 327,266    | (0.93)   |
| Non-employed <sup>a</sup>                 | 12,339,091 | (46.29)  | 14,949,973 | (49.74)  | 15,110,843 | (47.36)  | 14,978,370 | (45.35)  | 14,434,745 | (42.90)  | 14,296,062 | (41.67)  | 14,141,088 | (40.54)  | 14,141,088 | (40.17)  |
| Total                                     | 26,657,281 | (100.00) | 30,054,758 | (100.00) | 31,907,309 | (100.00) | 33,027,758 | (100.00) | 33,649,567 | (100.00) | 34,306,771 | (100.00) | 34,884,635 | (100.00) | 35,200,274 | (100.00) |

<sup>a</sup> Non-employed is the sum of unemployed and non-labor force.





**Supplementary Table 5.** Age-adjusted mortality rate per 100,000 in each occupation, Japan, 1970-2005 <sup>a</sup>

|                                           | 1970   | 1975   | 1980   | 1985  | 1990  | 1995  | 2000  | 2005  |
|-------------------------------------------|--------|--------|--------|-------|-------|-------|-------|-------|
| <i>Men</i>                                |        |        |        |       |       |       |       |       |
| Specialist and technical workers          | 340    | 282    | 319    | 257   | 234   | 223   | 312   | 231   |
| Administrative and managerial workers     | 233    | 223    | 192    | 215   | 193   | 170   | 248   | 241   |
| Clerical workers                          | 460    | 366    | 298    | 267   | 253   | 207   | 146   | 95    |
| Sales workers                             | 547    | 444    | 370    | 322   | 246   | 187   | 146   | 113   |
| Service workers                           | 515    | 389    | 488    | 426   | 476   | 442   | 401   | 348   |
| Security workers                          | 295    | 259    | 238    | 226   | 228   | 189   | 161   | 159   |
| Agriculture, forestry and fishery workers | 571    | 489    | 442    | 425   | 384   | 365   | 346   | 287   |
| Transport and communication workers       | 449    | 339    | 328    | 276   | 253   | 230   | 200   | 180   |
| Production process and related workers    | 415    | 327    | 250    | 216   | 181   | 156   | 105   | 89    |
| Workers not classifiable by occupation    | 14,668 | 15,038 | 20,796 | 9,141 | 5,935 | 7,231 | 4,900 | 768   |
| Non-employed <sup>b</sup>                 | 2,669  | 2,226  | 1,891  | 1,648 | 1,774 | 1,533 | 1,289 | 1,313 |
| <i>Women</i>                              |        |        |        |       |       |       |       |       |
| Specialist and technical workers          | 246    | 181    | 146    | 126   | 115   | 90    | 97    | 66    |
| Administrative and managerial workers     | 548    | 452    | 239    | 268   | 337   | 263   | 345   | 306   |
| Clerical workers                          | 234    | 153    | 105    | 83    | 68    | 54    | 39    | 29    |
| Sales workers                             | 197    | 164    | 137    | 135   | 111   | 81    | 68    | 55    |
| Service workers                           | 160    | 117    | 130    | 111   | 111   | 92    | 78    | 60    |
| Security workers                          | 1,615  | 1,027  | 822    | 1,335 | 991   | 508   | 398   | 390   |
| Agriculture, forestry and fishery workers | 256    | 224    | 172    | 148   | 133   | 114   | 103   | 85    |
| Transport and communication workers       | 899    | 585    | 844    | 712   | 808   | 440   | 324   | 278   |
| Production process and related workers    | 145    | 114    | 73     | 67    | 60    | 43    | 32    | 25    |
| Workers not classifiable by occupation    | 4,769  | 1,533  | 6,995  | 3,024 | 2,967 | 3,382 | 2,296 | 325   |
| Non-employed <sup>b</sup>                 | 489    | 387    | 324    | 286   | 256   | 254   | 242   | 222   |

<sup>a</sup> Age-adjusted mortality rates were calculated by the direct method, using the model population of 1985 in Japan as a reference.

<sup>b</sup> Non-employed is the sum of unemployed and non-labor force.



Supplementary Table 7. Adjusted prefecture-level residuals for all-cause premature mortality among women, Japan, 1970-2005

Table with 24 columns: Prefectures, Overall (OR, 95% CI, Rank), 1970 (OR, 95% CI, Rank), 1975 (OR, 95% CI, Rank), 1980 (OR, 95% CI, Rank), 1985 (OR, 95% CI, Rank), 1990 (OR, 95% CI, Rank), 1995 (OR, 95% CI, Rank), 2000 (OR, 95% CI, Rank), 2005 (OR, 95% CI, Rank). Rows list prefectures from Hokkaido to Okinawa.

CI; confidence interval, NA; not available, OR; odds ratio
Prefectures with a lower estimate of odds for all-cause premature mortality are ranked higher. The reference is the grand mean of all the prefectures.

**Supplementary Table 8.** Variance and covariance matrices of prefecture-level variances of each occupation group, Japan, 1970-2005 <sup>a</sup>

|                                                | Men                                            |                                    |                                               |                                      |                                  |                                  | Women                                          |                                    |                                               |                                      |                                  |                                  |
|------------------------------------------------|------------------------------------------------|------------------------------------|-----------------------------------------------|--------------------------------------|----------------------------------|----------------------------------|------------------------------------------------|------------------------------------|-----------------------------------------------|--------------------------------------|----------------------------------|----------------------------------|
|                                                | Clerical, technical and managerial occupations | Sales and service occupations      | Agriculture, forestry and fishery occupations | Production and transport occupations | Unclassifiable occupations       | Non-employed <sup>b</sup>        | Clerical, technical and managerial occupations | Sales and service occupations      | Agriculture, forestry and fishery occupations | Production and transport occupations | Unclassifiable occupations       | Non-employed <sup>b</sup>        |
| Clerical, technical and managerial occupations | 0.005<br>(0.001)<br><i>1.000</i>               |                                    |                                               |                                      |                                  |                                  | 0.008<br>(0.002)<br><i>1.000</i>               |                                    |                                               |                                      |                                  |                                  |
| Sales and service occupations                  | 0.006<br>(0.002)<br><i>0.716</i>               | 0.014<br>(0.003)<br><i>1.000</i>   |                                               |                                      |                                  |                                  | 0.003<br>(0.002)<br><i>0.345</i>               | 0.010<br>(0.002)<br><i>1.000</i>   |                                               |                                      |                                  |                                  |
| Agriculture, forestry and fishery occupations  | 0.002<br>(0.001)<br><i>0.303</i>               | 0.005<br>(0.002)<br><i>0.506</i>   | 0.006<br>(0.001)<br><i>1.000</i>              |                                      |                                  |                                  | 0.002<br>(0.002)<br><i>0.176</i>               | 0.004<br>(0.002)<br><i>0.393</i>   | 0.013<br>(0.003)<br><i>1.000</i>              |                                      |                                  |                                  |
| Production and transport occupations           | 0.006<br>(0.002)<br><i>0.731</i>               | 0.012<br>(0.003)<br><i>0.920</i>   | 0.004<br>(0.002)<br><i>0.484</i>              | 0.013<br>(0.003)<br><i>1.000</i>     |                                  |                                  | 0.004<br>(0.002)<br><i>0.472</i>               | 0.006<br>(0.002)<br><i>0.544</i>   | 0.004<br>(0.002)<br><i>0.308</i>              | 0.011<br>(0.003)<br><i>1.000</i>     |                                  |                                  |
| Unclassifiable occupations                     | -0.007<br>(0.007)<br><i>-0.168</i>             | -0.003<br>(0.010)<br><i>-0.051</i> | 0.006<br>(0.007)<br><i>0.139</i>              | -0.005<br>(0.010)<br><i>-0.078</i>   | 0.317<br>(0.066)<br><i>1.000</i> |                                  | -0.022<br>(0.009)<br><i>-0.440</i>             | -0.014<br>(0.009)<br><i>-0.247</i> | -0.019<br>(0.011)<br><i>-0.297</i>            | -0.014<br>(0.010)<br><i>-0.244</i>   | 0.331<br>(0.070)<br><i>1.000</i> |                                  |
| Non-employed <sup>b</sup>                      | -0.001<br>(0.001)<br><i>-0.226</i>             | -0.003<br>(0.001)<br><i>-0.387</i> | -0.0002<br>(0.001)<br><i>-0.030</i>           | -0.003<br>(0.001)<br><i>-0.358</i>   | 0.006<br>(0.007)<br><i>0.144</i> | 0.006<br>(0.001)<br><i>1.000</i> | -0.002<br>(0.001)<br><i>-0.198</i>             | 0.005<br>(0.002)<br><i>0.508</i>   | -0.002<br>(0.002)<br><i>-0.203</i>            | -0.001<br>(0.002)<br><i>-0.112</i>   | 0.014<br>(0.008)<br><i>0.262</i> | 0.008<br>(0.002)<br><i>1.000</i> |

<sup>a</sup> The number in parentheses is a standard error of the corresponding variances and covariances. The italicized numbers are correlation coefficients.

<sup>b</sup> Non-employed is the sum of unemployed and non-labor force.



**Supplementary Table 10.** Odds ratios for all-cause premature mortality of prefecture-level socioeconomic status variables, Japan, 1970-2005 <sup>a</sup>

|                                                  | Overall |                | 1970 <sup>b</sup> |                | 1975 <sup>b</sup> |                | 1980 |                | 1985 |                | 1990 |                | 1995 |                | 2000 |                | 2005 |                |
|--------------------------------------------------|---------|----------------|-------------------|----------------|-------------------|----------------|------|----------------|------|----------------|------|----------------|------|----------------|------|----------------|------|----------------|
|                                                  | OR      | (95% CI)       | OR                | (95% CI)       | OR                | (95% CI)       | OR   | (95% CI)       | OR   | (95% CI)       | OR   | (95% CI)       | OR   | (95% CI)       | OR   | (95% CI)       | OR   | (95% CI)       |
| <i>Men</i>                                       |         |                |                   |                |                   |                |      |                |      |                |      |                |      |                |      |                |      |                |
| Gini's coefficient of yearly income <sup>c</sup> |         |                |                   |                |                   |                |      |                |      |                |      |                |      |                |      |                |      |                |
| Low                                              | 1.00    | Reference      | 1.00              | Reference      | 1.00              | Reference      | 1.00 | Reference      | 1.00 | Reference      | 1.00 | Reference      | 1.00 | Reference      | 1.00 | Reference      | 1.00 | Reference      |
| Middle                                           | 1.01    | (0.99 to 1.03) | 1.03              | (0.98 to 1.07) | 1.03              | (0.99 to 1.07) | 1.01 | (0.97 to 1.06) | 1.00 | (0.97 to 1.04) | 1.03 | (0.99 to 1.07) | 0.99 | (0.93 to 1.04) | 1.02 | (0.96 to 1.08) | 0.99 | (0.92 to 1.07) |
| High                                             | 1.01    | (0.98 to 1.03) | 1.03              | (0.99 to 1.07) | 1.01              | (0.97 to 1.05) | 0.99 | (0.95 to 1.04) | 0.98 | (0.94 to 1.01) | 0.99 | (0.95 to 1.03) | 1.00 | (0.94 to 1.06) | 0.98 | (0.93 to 1.05) | 0.98 | (0.91 to 1.06) |
| Average yearly income <sup>c</sup>               |         |                |                   |                |                   |                |      |                |      |                |      |                |      |                |      |                |      |                |
| High                                             | 1.00    | Reference      | 1.00              | Reference      | 1.00              | Reference      | 1.00 | Reference      | 1.00 | Reference      | 1.00 | Reference      | 1.00 | Reference      | 1.00 | Reference      | 1.00 | Reference      |
| Middle                                           | 0.99    | (0.97 to 1.02) | 0.99              | (0.95 to 1.03) | 1.04              | (1.00 to 1.08) | 1.05 | (1.00 to 1.09) | 0.99 | (0.95 to 1.03) | 1.00 | (0.96 to 1.04) | 1.05 | (0.99 to 1.11) | 1.07 | (1.01 to 1.13) | 0.99 | (0.91 to 1.07) |
| Low                                              | 0.99    | (0.96 to 1.02) | 1.04              | (1.00 to 1.08) | 1.05              | (1.01 to 1.08) | 1.04 | (0.99 to 1.09) | 0.98 | (0.94 to 1.02) | 0.96 | (0.92 to 1.00) | 1.01 | (0.96 to 1.07) | 1.04 | (0.98 to 1.10) | 1.03 | (0.96 to 1.11) |
| Average savings <sup>c</sup>                     |         |                |                   |                |                   |                |      |                |      |                |      |                |      |                |      |                |      |                |
| High                                             | 1.00    | Reference      | 1.00              | Reference      | 1.00              | Reference      | 1.00 | Reference      | 1.00 | Reference      | 1.00 | Reference      | 1.00 | Reference      | 1.00 | Reference      | 1.00 | Reference      |
| Middle                                           | 1.00    | (0.97 to 1.02) | 1.04              | (1.00 to 1.08) | 1.04              | (1.00 to 1.08) | 1.02 | (0.97 to 1.07) | 1.02 | (0.98 to 1.06) | 0.99 | (0.95 to 1.03) | 1.05 | (0.99 to 1.11) | 1.07 | (1.01 to 1.13) | 1.03 | (0.95 to 1.11) |
| Low                                              | 1.01    | (0.98 to 1.05) | 1.07              | (1.03 to 1.12) | 1.05              | (1.01 to 1.09) | 1.02 | (0.98 to 1.07) | 0.99 | (0.95 to 1.03) | 0.97 | (0.93 to 1.01) | 1.04 | (0.98 to 1.10) | 1.07 | (1.01 to 1.14) | 1.08 | (1.00 to 1.16) |
| <i>Women</i>                                     |         |                |                   |                |                   |                |      |                |      |                |      |                |      |                |      |                |      |                |
| Gini's coefficient of yearly income <sup>c</sup> |         |                |                   |                |                   |                |      |                |      |                |      |                |      |                |      |                |      |                |
| Low                                              | 1.00    | Reference      | 1.00              | Reference      | 1.00              | Reference      | 1.00 | Reference      | 1.00 | Reference      | 1.00 | Reference      | 1.00 | Reference      | 1.00 | Reference      | 1.00 | Reference      |
| Middle                                           | 1.00    | (0.97 to 1.02) | 0.98              | (0.93 to 1.05) | 1.01              | (0.95 to 1.08) | 1.00 | (0.95 to 1.05) | 1.04 | (0.99 to 1.09) | 1.02 | (0.97 to 1.07) | 0.97 | (0.90 to 1.03) | 0.96 | (0.89 to 1.03) | 0.99 | (0.91 to 1.07) |
| High                                             | 1.01    | (0.98 to 1.04) | 1.01              | (0.95 to 1.07) | 1.04              | (0.98 to 1.11) | 1.04 | (0.98 to 1.10) | 1.05 | (1.00 to 1.10) | 1.02 | (0.97 to 1.07) | 0.99 | (0.93 to 1.06) | 0.99 | (0.92 to 1.07) | 1.00 | (0.93 to 1.09) |
| Average yearly income <sup>c</sup>               |         |                |                   |                |                   |                |      |                |      |                |      |                |      |                |      |                |      |                |
| High                                             | 1.00    | Reference      | 1.00              | Reference      | 1.00              | Reference      | 1.00 | Reference      | 1.00 | Reference      | 1.00 | Reference      | 1.00 | Reference      | 1.00 | Reference      | 1.00 | Reference      |
| Middle                                           | 1.01    | (0.98 to 1.04) | 1.09              | (1.03 to 1.15) | 1.07              | (1.01 to 1.13) | 1.01 | (0.96 to 1.06) | 1.04 | (0.99 to 1.10) | 1.01 | (0.97 to 1.07) | 1.00 | (0.94 to 1.07) | 1.06 | (0.99 to 1.14) | 0.96 | (0.89 to 1.04) |
| Low                                              | 1.02    | (0.99 to 1.06) | 1.10              | (1.05 to 1.16) | 1.09              | (1.04 to 1.16) | 1.05 | (0.99 to 1.11) | 1.04 | (0.98 to 1.09) | 1.02 | (0.97 to 1.08) | 1.04 | (0.98 to 1.12) | 1.04 | (0.97 to 1.12) | 1.04 | (0.96 to 1.13) |
| Average savings <sup>c</sup>                     |         |                |                   |                |                   |                |      |                |      |                |      |                |      |                |      |                |      |                |
| High                                             | 1.00    | Reference      | 1.00              | Reference      | 1.00              | Reference      | 1.00 | Reference      | 1.00 | Reference      | 1.00 | Reference      | 1.00 | Reference      | 1.00 | Reference      | 1.00 | Reference      |
| Middle                                           | 1.00    | (0.97 to 1.03) | 1.09              | (1.03 to 1.15) | 1.05              | (0.99 to 1.12) | 1.01 | (0.96 to 1.07) | 1.02 | (0.96 to 1.07) | 1.08 | (1.03 to 1.13) | 1.03 | (0.96 to 1.10) | 1.05 | (0.98 to 1.13) | 1.01 | (0.93 to 1.09) |
| Low                                              | 1.02    | (0.98 to 1.06) | 1.08              | (1.02 to 1.14) | 1.04              | (0.98 to 1.11) | 1.02 | (0.96 to 1.07) | 1.01 | (0.96 to 1.07) | 1.03 | (0.98 to 1.07) | 1.06 | (0.99 to 1.13) | 1.08 | (1.00 to 1.16) | 1.05 | (0.97 to 1.14) |

CI; confidence interval, OR; odds ratio

<sup>a</sup> These odds ratios were adjusted for age, occupations, and year (only in the overall model). Prefecture-level variables were adjusted for separately.

<sup>b</sup> Gini's coefficients of yearly income were not available in these models, and we imputed the values of the 1980 model to them.

<sup>c</sup> These variables were calculated among two-or-more-person households.

1  
2  
3  
4  
5  
6  
7  
8  
9  
10  
11  
12  
13  
14  
15  
16  
17  
18  
19  
20  
21  
22  
23  
24  
25  
26  
27  
28  
29  
30  
31  
32  
33  
34  
35  
36  
37  
38  
39  
40  
41  
42  
43  
44  
45  
46  
47



Supplementary Figure 1. A blank map of Japan.





**Supplementary Figure 2.** Geographic and temporal variation in all-cause premature mortality among men, Japan.

1  
2  
3  
4  
5  
6  
7  
8  
9  
10  
11  
12  
13  
14  
15  
16  
17  
18  
19  
20  
21  
22  
23  
24  
25  
26  
27  
28  
29  
30  
31  
32  
33  
34  
35  
36  
37  
38  
39  
40  
41  
42  
43  
44  
45  
46  
47

1  
2  
3  
4  
5  
6  
7  
8  
9  
10  
11  
12  
13  
14  
15  
16  
17  
18  
19  
20  
21  
22  
23  
24  
25  
26  
27  
28  
29  
30  
31  
32  
33  
34  
35  
36  
37  
38  
39  
40  
41  
42  
43  
44  
45  
46  
47



Supplementary Figure 3. Geographic and temporal variation in all-cause premature mortality among women, Japan.



**Supplementary Figure 4.** Geographic inequality of all-cause premature mortality by occupational groups among men, Japan, 1970-2005.

1  
2  
3  
4  
5  
6  
7  
8  
9  
10  
11  
12  
13  
14  
15  
16  
17  
18  
19  
20  
21  
22  
23  
24  
25  
26  
27  
28  
29  
30  
31  
32  
33  
34  
35  
36  
37  
38  
39  
40  
41  
42  
43  
44  
45  
46  
47

1  
2  
3  
4  
5  
6  
7  
8  
9  
10  
11  
12  
13  
14  
15  
16  
17  
18  
19  
20  
21  
22  
23  
24  
25  
26  
27  
28  
29  
30  
31  
32  
33  
34  
35  
36  
37  
38  
39  
40  
41  
42  
43  
44  
45  
46  
47



Supplementary Figure 5. Geographic inequality of all-cause premature mortality by occupational groups among women, Japan, 1970-2005.

## Legends of Supplementary Figures

### Supplementary Figure 1. A blank map of Japan.

We show the locations of 47 prefectures in Japan.

### Supplementary Figure 2. Geographic and temporal variation in all-cause premature mortality among men, Japan.

We show year-specific geographic inequality of all-cause mortality across 47 prefectures, conditional on individual age and occupation. (The data for Okinawa prefecture were not available in 1970.) Prefecture-level residuals are described in odds ratios with the reference being the grand mean of all the prefectures. Prefectures with a lower and a higher estimate of odds for mortality are filled with blue and red, respectively. Regarding areas filled with gray, prefecture-level residuals were not statistically significant.

### Supplementary Figure 3. Geographic and temporal variation in all-cause premature mortality among women, Japan.

We show year-specific geographic inequality of all-cause mortality across 47 prefectures, conditional on individual age and occupation. (The data for Okinawa prefecture were not available in 1970.) Prefecture-level residuals are described in odds ratios with the reference being the grand mean of all the prefectures. Prefectures with a lower and a higher estimate of odds for mortality are filled with blue and red, respectively. Regarding areas filled with gray, prefecture-level residuals were not statistically significant.

### Supplementary Figure 4. Geographic inequality of all-cause premature mortality by occupational groups among men, Japan, 1970-2005.

We show the geographic inequality of all-cause mortality across 47 prefectures for the six collapsed occupational groups, conditional on individual age, occupation, and year. Prefecture-level residuals are described in odds ratios with the reference being the grand mean of all the prefectures. Prefectures with a lower and a higher estimate of odds for mortality are filled with blue and red, respectively. Regarding areas filled with gray, prefecture-level residuals were not statistically significant.

### Supplementary Figure 5. Geographic inequality of all-cause premature mortality by occupational groups among women, Japan, 1970-2005.

We show the geographic inequality of all-cause mortality across 47 prefectures for the six collapsed occupational groups, conditional on individual age, occupation, and year. Prefecture-level residuals are described in odds ratios with the reference being the grand mean of all the prefectures. Prefectures with a lower and a higher estimate of odds for mortality are filled with blue and red, respectively. Regarding areas filled with gray, prefecture-level residuals were not statistically significant.

1 STROBE Statement—Checklist of items that should be included in reports of *cohort studies*

|                              | Item No | Recommendation                                                                                                                                                                                    |     |
|------------------------------|---------|---------------------------------------------------------------------------------------------------------------------------------------------------------------------------------------------------|-----|
| <b>Title and abstract</b>    | 1       | (a) Indicate the study's design with a commonly used term in the title or the abstract                                                                                                            | Yes |
|                              |         | (b) Provide in the abstract an informative and balanced summary of what was done and what was found                                                                                               | Yes |
| <b>Introduction</b>          |         |                                                                                                                                                                                                   |     |
| Background/rationale         | 2       | Explain the scientific background and rationale for the investigation being reported                                                                                                              | Yes |
| Objectives                   | 3       | State specific objectives, including any prespecified hypotheses                                                                                                                                  | Yes |
| <b>Methods</b>               |         |                                                                                                                                                                                                   |     |
| Study design                 | 4       | Present key elements of study design early in the paper                                                                                                                                           | Yes |
| Setting                      | 5       | Describe the setting, locations, and relevant dates, including periods of recruitment, exposure, follow-up, and data collection                                                                   | Yes |
| Participants                 | 6       | (a) Give the eligibility criteria, and the sources and methods of selection of participants. Describe methods of follow-up                                                                        | Yes |
|                              |         | (b) For matched studies, give matching criteria and number of exposed and unexposed                                                                                                               | NA  |
| Variables                    | 7       | Clearly define all outcomes, exposures, predictors, potential confounders, and effect modifiers. Give diagnostic criteria, if applicable                                                          | Yes |
| Data sources/<br>measurement | 8*      | For each variable of interest, give sources of data and details of methods of assessment (measurement). Describe comparability of assessment methods if there is more than one group              | NA  |
| Bias                         | 9       | Describe any efforts to address potential sources of bias                                                                                                                                         | Yes |
| Study size                   | 10      | Explain how the study size was arrived at                                                                                                                                                         | NA  |
| Quantitative variables       | 11      | Explain how quantitative variables were handled in the analyses. If applicable, describe which groupings were chosen and why                                                                      | Yes |
| Statistical methods          | 12      | (a) Describe all statistical methods, including those used to control for confounding                                                                                                             | Yes |
|                              |         | (b) Describe any methods used to examine subgroups and interactions                                                                                                                               | Yes |
|                              |         | (c) Explain how missing data were addressed                                                                                                                                                       | NA  |
|                              |         | (d) If applicable, explain how loss to follow-up was addressed                                                                                                                                    | NA  |
|                              |         | (e) Describe any sensitivity analyses                                                                                                                                                             | Yes |
| <b>Results</b>               |         |                                                                                                                                                                                                   |     |
| Participants                 | 13*     | (a) Report numbers of individuals at each stage of study—eg numbers potentially eligible, examined for eligibility, confirmed eligible, included in the study, completing follow-up, and analysed | Yes |
|                              |         | (b) Give reasons for non-participation at each stage                                                                                                                                              | NA  |
|                              |         | (c) Consider use of a flow diagram                                                                                                                                                                | NA  |
| Descriptive data             | 14*     | (a) Give characteristics of study participants (eg demographic, clinical, social) and information on exposures and potential confounders                                                          | Yes |
|                              |         | (b) Indicate number of participants with missing data for each variable of interest                                                                                                               | NA  |
|                              |         | (c) Summarise follow-up time (eg, average and total amount)                                                                                                                                       | NA  |
| Outcome data                 | 15*     | Report numbers of outcome events or summary measures over time                                                                                                                                    | Yes |
| Main results                 | 16      | (a) Give unadjusted estimates and, if applicable, confounder-adjusted estimates and their precision (eg, 95% confidence interval). Make clear which                                               | Yes |

|                          |    |                                                                                                                                                                            |     |
|--------------------------|----|----------------------------------------------------------------------------------------------------------------------------------------------------------------------------|-----|
|                          |    | confounders were adjusted for and why they were included                                                                                                                   |     |
|                          |    | (b) Report category boundaries when continuous variables were categorized                                                                                                  | Yes |
|                          |    | (c) If relevant, consider translating estimates of relative risk into absolute risk for a meaningful time period                                                           | Yes |
| Other analyses           | 17 | Report other analyses done—eg analyses of subgroups and interactions, and sensitivity analyses                                                                             | Yes |
| <b>Discussion</b>        |    |                                                                                                                                                                            |     |
| Key results              | 18 | Summarise key results with reference to study objectives                                                                                                                   | Yes |
| Limitations              | 19 | Discuss limitations of the study, taking into account sources of potential bias or imprecision. Discuss both direction and magnitude of any potential bias                 | Yes |
| Interpretation           | 20 | Give a cautious overall interpretation of results considering objectives, limitations, multiplicity of analyses, results from similar studies, and other relevant evidence | Yes |
| Generalisability         | 21 | Discuss the generalisability (external validity) of the study results                                                                                                      | Yes |
| <b>Other information</b> |    |                                                                                                                                                                            |     |
| Funding                  | 22 | Give the source of funding and the role of the funders for the present study and, if applicable, for the original study on which the present article is based              | Yes |

\*Give information separately for exposed and unexposed groups.

**Note:** An Explanation and Elaboration article discusses each checklist item and gives methodological background and published examples of transparent reporting. The STROBE checklist is best used in conjunction with this article (freely available on the Web sites of PLoS Medicine at <http://www.plosmedicine.org/>, Annals of Internal Medicine at <http://www.annals.org/>, and Epidemiology at <http://www.epidem.com/>). Information on the STROBE Initiative is available at <http://www.strobe-statement.org>.
