# Supplementary figures and images for: Social and geographic inequalities in premature adult mortality in Japan: a multilevel observational study from 1970 to 2005
Source: PubMed Central journal article supplement — BMJ Open. 2012 Mar 2;2(2):e000425. doi: 10.1136/bmjopen-2011-000425 (PMC3293144; doi:10.1136/bmjopen-2011-000425), 2012-03-02

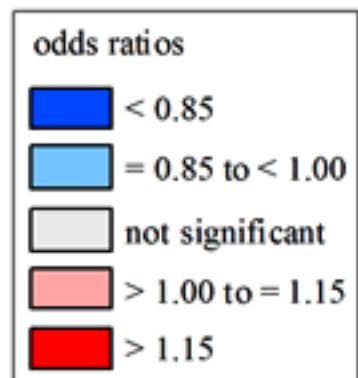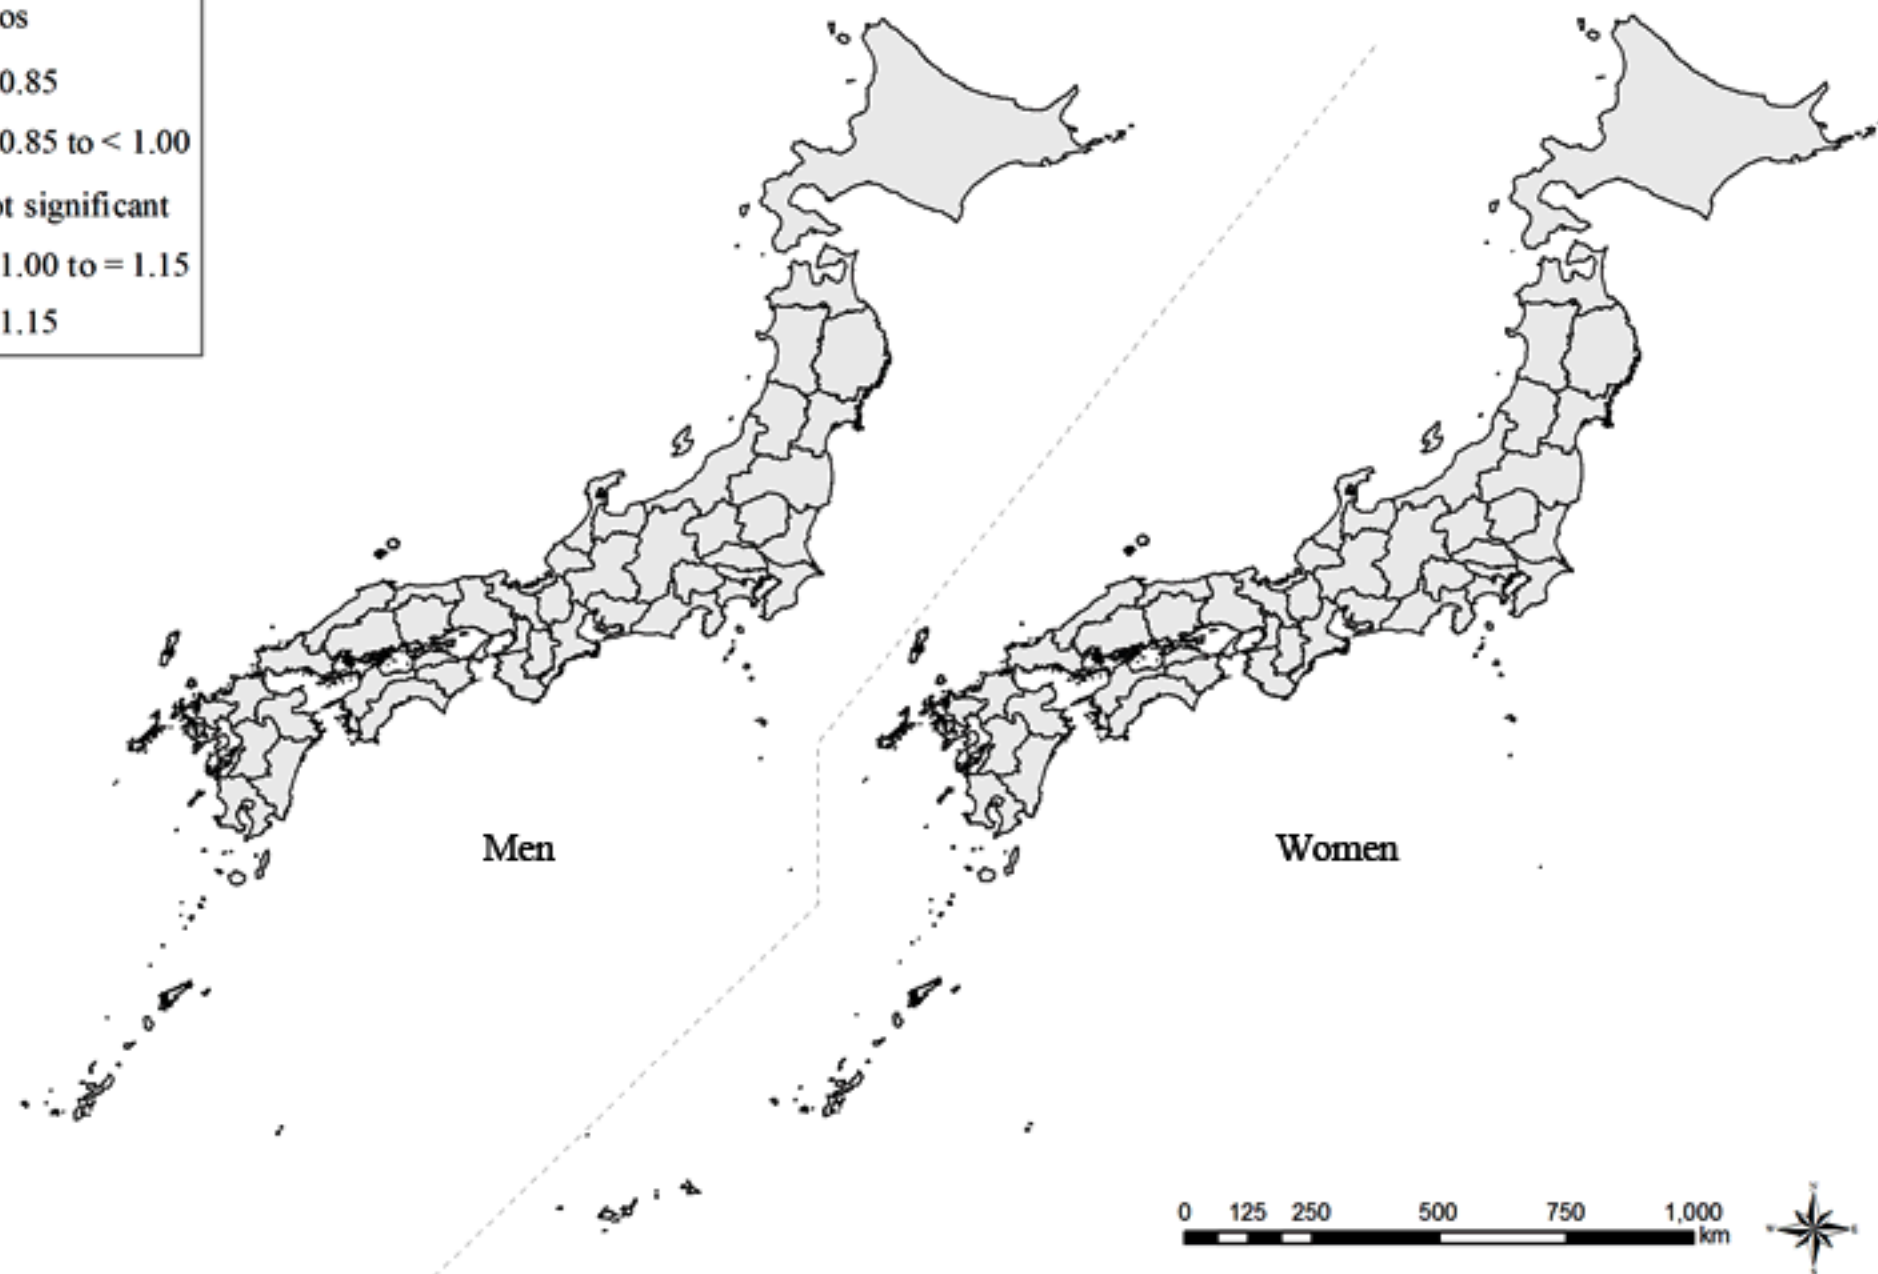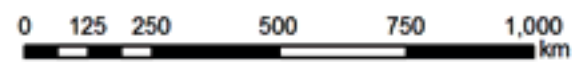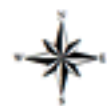

**Geographic and temporal variation in all-cause mortality, Japan**

Supplement: bmjopen-2011-000425-s4.pdf [file bmjopen-2011-000425-s4.pdf]
